# Supplementary material for: Combining Next-Generation Sequencing Strategies for Rapid Molecular Resource Development from an Invasive Aphid Species, Aphis glycines
Source: PLoS One. 2010 Jun 29;5(6):e11370. doi: 10.1371/journal.pone.0011370 (PMC2894077; doi:10.1371/journal.pone.0011370)
Supplement: Table S1 — Gene Ontology assignment for Aphis glycines B1 transcript sequences (0.61 MB XLS) [file pone.0011370.s002.xls]

## Sheet: GO
A. glycines sequence Name	GO terms
ESTAGB1WB000001	C:cell part
ESTAGB1WB000002	C:cytoplasm; F:hydrolase activity; P:regulation of translational termination; C:nucleus
ESTAGB1WB000011	P:axon ensheathment; P:central complex development; P:axon extension; C:lateral plasma membrane; P:regulation of tube size, open tracheal system; P:establishment of endothelial blood-brain barrier; F:calcium ion binding; P:mushroom body development; P:septate junction assembly; P:synapse organization; P:nerve maturation; P:neuron adhesion; C:pleated septate junction; P:imaginal disc morphogenesis…
ESTAGB1WB000015	F:damaged DNA binding; F:nucleotide binding; P:nucleotide-excision repair; C:nucleus
ESTAGB1WB000025	P:viral genome replication; P:regulation of transcription from RNA polymerase II promoter; F:nucleic acid binding; C:nucleolus; F:protein binding; F:transcription elongation regulator activity; F:RNA polymerase II transcription factor activity; C:transcription factor complex
ESTAGB1WB000026	C:cytoplasm; P:deoxyribonucleotide catabolic process; F:deoxyribose-phosphate aldolase activity; P:pentose-phosphate shunt
ESTAGB1WB000034	F:structural constituent of cuticle
ESTAGB1WB000037	F:ATP binding; P:response to stress
ESTAGB1WB000038	F:structural constituent of cuticle
ESTAGB1WB000041	C:cytoskeleton; C:cytoplasm; F:ATP binding; F:protein binding
ESTAGB1WB000042	F:structural constituent of cuticle
ESTAGB1WB000056	F:structural constituent of cuticle
ESTAGB1WB000058	C:endosome; F:protein binding; P:transport; P:cellular process; C:membrane
ESTAGB1WB000067	F:structural constituent of cuticle
ESTAGB1WB000073	F:L-malate dehydrogenase activity; F:binding; P:oxidation reduction; P:malate metabolic process; P:cellular carbohydrate metabolic process; P:glycolysis; C:mitochondrial matrix; C:lipid particle; P:pyruvate metabolic process; P:reductive tricarboxylic acid cycle; P:glyoxylate metabolic process
ESTAGB1WB000076	C:cytosol; P:negative regulation of ubiquitin-protein ligase activity during mitotic cell cycle; F:endopeptidase activity; C:nucleolus; C:proteasome regulatory particle; P:anaphase-promoting complex-dependent proteasomal ubiquitin-dependent protein catabolic process; F:ATP binding; F:ATPase activity; P:positive regulation of ubiquitin-protein ligase activity during mitotic cell cycle
ESTAGB1WB000084	F:receptor activity; F:kinase activity; P:signal transduction
ESTAGB1WB000085	F:molecular_function; C:signalosome; C:cytoplasm; P:biological_process; C:cellular_component; C:nucleus
ESTAGB1WB000086	F:helicase activity; F:nucleotide binding
ESTAGB1WB000087	C:mitochondrial matrix
ESTAGB1WB000088	P:sensory organ development; F:metal ion binding; P:border follicle cell migration; P:anti-apoptosis; P:antennal morphogenesis; P:protein ubiquitination; F:protein binding; P:spermatid nucleus differentiation
ESTAGB1WB000089	P:apoptosis
ESTAGB1WB000091	F:receptor activity; C:integral to membrane
ESTAGB1WB000092	F:binding; P:salivary gland cell autophagic cell death
ESTAGB1WB000095	F:myosin heavy chain binding; F:calcium ion binding
ESTAGB1WB000103	C:heterogeneous nuclear ribonucleoprotein complex; F:mRNA binding
ESTAGB1WB000106	C:integral to membrane
ESTAGB1WB000107	F:calcium ion binding; C:muscle myosin complex
ESTAGB1WB000110	F:sugar binding; P:central nervous system development; P:protein folding; C:endoplasmic reticulum lumen; F:calcium ion binding; F:unfolded protein binding; F:zinc ion binding; P:olfactory behavior
ESTAGB1WB000111	P:leg segmentation; P:uracil catabolic process; P:leg disc development; F:glutamate decarboxylase activity; P:visual behavior; F:aspartate 1-decarboxylase activity; P:pigmentation during development; P:beta-alanine biosynthetic process; F:pyridoxal phosphate binding; P:aspartate metabolic process; P:taurine metabolic process; P:alanine biosynthetic process
ESTAGB1WB000114	C:mitochondrial large ribosomal subunit
ESTAGB1WB000118	C:ribosome; F:structural constituent of ribosome; P:translation; P:ribosome biogenesis
ESTAGB1WB000126	F:zinc ion binding; P:chromatin silencing; F:protein binding; F:specific RNA polymerase II transcription factor activity; C:transcription factor complex; P:regulation of transcription from RNA polymerase II promoter
ESTAGB1WB000130	F:metal ion binding; F:phosphoprotein phosphatase activity; P:protein amino acid dephosphorylation
ESTAGB1WB000133	P:modification-dependent protein catabolic process; C:cellular_component
ESTAGB1WB000135	F:structural constituent of cuticle
ESTAGB1WB000136	F:metal ion binding; C:nucleus; F:protein binding
ESTAGB1WB000137	F:DNA binding; C:polytene chromosome; F:6-phosphofructokinase activity; C:6-phosphofructokinase complex; P:chromatin remodeling; P:glycolysis; C:nucleus; F:nucleotide binding; P:fructose metabolic process; P:galactose metabolic process; P:mannose metabolic process; P:gluconeogenesis; P:pentose-phosphate shunt
ESTAGB1WB000139	P:neurotransmitter receptor metabolic process; P:glutamine biosynthetic process; F:ATP binding; P:synaptogenesis; F:glutamate-ammonia ligase activity; P:glutamate catabolic process; C:cytoplasm; P:peptidoglycan biosynthetic process
ESTAGB1WB000140	P:translation; C:ribosome; F:ATP-dependent RNA helicase activity; F:nucleic acid binding; F:structural constituent of ribosome; F:ATP binding; P:nuclear mRNA splicing, via spliceosome; F:RNA splicing factor activity, transesterification mechanism; C:U12-type prespliceosome; P:ribosome biogenesis
ESTAGB1WB000141	F:receptor activity; P:regulation of tube length, open tracheal system; F:chitin binding; C:extracellular region; F:chitin deacetylase activity; P:chitin metabolic process; P:signal transduction
ESTAGB1WB000142	P:response to stress; P:response to heat
ESTAGB1WB000145	P:response to heat
ESTAGB1WB000146	P:response to stress
ESTAGB1WB000147	F:transferase activity; P:isoprenoid biosynthetic process
ESTAGB1WB000149	P:mitochondrial electron transport, cytochrome c to oxygen; C:lipid particle; C:mitochondrial respiratory chain complex IV; F:cytochrome-c oxidase activity; P:proton transport
ESTAGB1WB000151	F:NAD or NADH binding; C:lipid particle; C:mitochondrial matrix; P:oxidation reduction; F:magnesium ion binding; P:tricarboxylic acid cycle; F:isocitrate dehydrogenase (NAD+) activity
ESTAGB1WB000154	C:ATP-binding cassette (ABC) transporter complex; C:integral to membrane; F:ATPase activity; F:ATP binding; F:transporter activity; P:transport
ESTAGB1WB000158	F:FK506 binding; P:protein folding; F:protein binding; C:membrane fraction; P:muscle contraction; C:cytosol; C:sarcoplasmic reticulum membrane; P:cytokine-mediated signaling pathway; F:peptidyl-prolyl cis-trans isomerase activity; P:negative regulation of protein amino acid phosphorylation; P:release of sequestered calcium ion into cytosol; P:response to caffeine; P:T cell proliferation
ESTAGB1WB000160	P:mitotic spindle elongation; C:cytoplasm; F:RNA binding
ESTAGB1WB000164	C:cytoplasm; C:heterotrimeric G-protein complex; F:signal transducer activity; P:phototransduction; P:G-protein coupled receptor protein signaling pathway; C:rhabdomere; F:GTPase activity
ESTAGB1WB000166	P:peristalsis; C:mitochondrion; P:spermatogenesis; P:larval locomotory behavior
ESTAGB1WB000168	F:binding; P:metabolic process; F:catalytic activity
ESTAGB1WB000170	C:eukaryotic translation initiation factor 3 complex; F:translation initiation factor activity; P:camera-type eye development; P:embryonic viscerocranium morphogenesis; C:ribosome; P:regulation of translational initiation
ESTAGB1WB000171	C:extracellular region; F:bacterial binding; P:regulation of innate immune response
ESTAGB1WB000172	C:ribosome
ESTAGB1WB000176	F:nutrient reservoir activity
ESTAGB1WB000178	C:mitochondrial respiratory chain complex IV; F:cytochrome-c oxidase activity; P:mitochondrial electron transport, cytochrome c to oxygen; P:proton transport
ESTAGB1WB000182	P:acute-phase response; P:hyaluronan metabolic process; F:serine-type endopeptidase inhibitor activity; C:extracellular region
ESTAGB1WB000185	P:biological_process; P:melanosome organization; F:protein binding; C:cellular_component
ESTAGB1WB000192	F:RNA binding; C:intracellular; P:RNA processing
ESTAGB1WB000195	F:nucleic acid binding; F:kinase activity; F:zinc ion binding; C:intracellular
ESTAGB1WB000196	F:ATP binding; P:response to stress; F:nucleotide binding
ESTAGB1WB000198	P:axonogenesis
ESTAGB1WB000201	F:hydrogen ion transmembrane transporter activity; C:mitochondrial proton-transporting ATP synthase complex, coupling factor F(o); P:ATP synthesis coupled proton transport; C:lipid particle
ESTAGB1WB000206	P:cell adhesion; C:membrane; F:protein binding; C:anchored to membrane; C:plasma membrane
ESTAGB1WB000208	C:cytoplasmic membrane-bounded vesicle; P:establishment of localization in cell; P:protein transport
ESTAGB1WB000211	P:methylation; F:methyltransferase activity
ESTAGB1WB000212	C:membrane part
ESTAGB1WB000217	C:eukaryotic translation initiation factor 3 complex; C:fibrillar center; C:nucleoplasm; F:protein binding; F:translation initiation factor activity; C:ribosome; P:regulation of translational initiation
ESTAGB1WB000222	F:binding; C:nuclear pore; C:cytoplasm; P:protein import into nucleus, docking; P:intracellular protein transport; C:nucleus; F:protein transporter activity
ESTAGB1WB000224	C:membrane; F:receptor activity; F:calcium ion binding; F:transferase activity; P:signal transduction
ESTAGB1WB000226	F:translation initiation factor activity; C:ribosome; P:regulation of translational initiation
ESTAGB1WB000228	P:response to oxidative stress; P:glyoxylate cycle; C:cytosol; P:response to steroid hormone stimulus; C:peroxisome; C:soluble fraction; F:manganese ion binding; P:female gonad development; P:oxidation reduction; P:glutathione metabolic process; F:NAD or NADH binding; F:isocitrate dehydrogenase (NADP+) activity; F:magnesium ion binding; P:response to organic cyclic substance; P:isocitrate metabol…
ESTAGB1WB000230	P:mitotic spindle elongation; C:eukaryotic 43S preinitiation complex; P:smoothened signaling pathway; F:RNA binding; F:translation initiation factor activity; C:cytosol; P:phagocytosis, engulfment; C:ribosome; P:regulation of translational initiation
ESTAGB1WB000233	F:transcription corepressor activity; P:negative regulation of transcription, DNA-dependent; C:Sin3 complex; C:transcription factor complex
ESTAGB1WB000235	F:binding; P:developmental process; C:intracellular part
ESTAGB1WB000240	P:cellular iron ion homeostasis; F:ferrous iron binding; F:oxidoreductase activity; C:Golgi apparatus; F:ferric iron binding; C:intracellular ferritin complex; P:iron ion transport
ESTAGB1WB000242	P:protein folding; F:endopeptidase activity; C:proteasome regulatory particle, base subcomplex; F:ATPase activity; F:protein binding; F:ATP binding; P:proteolysis; C:nucleus; C:cytosol
ESTAGB1WB000243	F:aminoacyl-tRNA ligase activity; P:tRNA aminoacylation for protein translation
ESTAGB1WB000244	F:transcription regulator activity; F:nucleic acid binding; P:regulation of transcription; F:zinc ion binding
ESTAGB1WB000245	C:cytoskeleton; P:regulation of cell shape; P:cortical actin cytoskeleton organization; P:positive regulation of growth rate; P:embryonic development ending in birth or egg hatching; P:cell projection assembly; P:phagocytosis, engulfment; P:actin filament polymerization
ESTAGB1WB000253	F:transferase activity; P:metabolic process; F:N-acetyltransferase activity
ESTAGB1WB000255	F:binding
ESTAGB1WB000258	P:leukotriene biosynthetic process; F:aminopeptidase activity; P:proteolysis; F:leukotriene-A4 hydrolase activity; F:zinc ion binding; F:metallopeptidase activity
ESTAGB1WB000260	P:neuropeptide signaling pathway; F:ecdysis-triggering hormone activity; P:ecdysis, chitin-based cuticle
ESTAGB1WB000262	F:oxidoreductase activity; F:iron ion binding
ESTAGB1WB000265	P:nicotinamide riboside catabolic process; F:transferase activity, transferring glycosyl groups
ESTAGB1WB000269	F:aminoacyl-tRNA ligase activity; P:tRNA aminoacylation for protein translation; F:nucleotide binding
ESTAGB1WB000276	P:regulation of alternative nuclear mRNA splicing, via spliceosome; C:nuclear speck; P:nervous system development
ESTAGB1WB000281	P:system development; C:membrane
ESTAGB1WB000282	F:heme binding; P:oxidation reduction; F:monooxygenase activity; F:electron carrier activity; P:electron transport chain
ESTAGB1WB000287	F:oxidoreductase activity; P:oxidation reduction
ESTAGB1WB000288	P:hemopoiesis; P:protein export from nucleus; C:mitochondrial nucleoid; C:cell surface; F:enzyme binding; P:anti-apoptosis; F:oxidoreductase activity; F:ATP binding; F:ATPase activity; P:metabolic process; F:unfolded protein binding
ESTAGB1WB000294	C:integral to membrane; C:mitochondrial inner membrane; F:ATPase activity, coupled to transmembrane movement of substances; P:heme transport; P:iron-sulfur cluster assembly; C:ATP-binding cassette (ABC) transporter complex; F:heme transporter activity; F:ATP binding
ESTAGB1WB000300	P:response to virus; F:protein transporter activity; C:protein complex; P:protein localization in nucleus; P:protein export from nucleus; C:intracellular non-membrane-bounded organelle; F:protein binding; C:membrane part; P:regulation of protein catabolic process; C:endomembrane system; P:regulation of centrosome duplication; C:nucleoplasm; C:cytoplasm
ESTAGB1WB000302	P:translation; C:cytoplasm; P:regulation of translational initiation; F:translation initiation factor activity; C:eukaryotic translation initiation factor 3 complex
ESTAGB1WB000310	C:intracellular; F:GTP binding
ESTAGB1WB000311	C:cytoskeleton; P:regulation of actin filament polymerization
ESTAGB1WB000313	F:transcription regulator activity; F:protein binding; C:brahma complex; P:positive regulation of transcription, DNA-dependent
ESTAGB1WB000327	C:cytoplasm; C:soluble fraction; F:nucleic acid binding; P:aspartyl-tRNA aminoacylation; F:asparagine-tRNA ligase activity; F:ATP binding; P:asparaginyl-tRNA aminoacylation; F:aspartate-tRNA ligase activity; P:alanine metabolic process; P:aspartate metabolic process
ESTAGB1WB000329	F:hyalurononglucosaminidase activity; P:metabolic process; F:hydrolase activity; F:hydrolase activity, acting on glycosyl bonds
ESTAGB1WB000335	F:guanyl-nucleotide exchange factor activity; C:intracellular; P:regulation of small GTPase mediated signal transduction; P:regulation of GTPase activity
ESTAGB1WB000342	F:specific transcriptional repressor activity; P:protein amino acid phosphorylation; P:R8 cell fate specification; P:sister chromatid segregation; P:regulation of cell shape; F:protein kinase binding; P:imaginal disc growth; F:oxidoreductase activity; P:cell division; P:DNA damage response, signal transduction by p53 class mediator resulting in induction of apoptosis; P:regulation of actin filame…
ESTAGB1WB000343	C:intracellular membrane-bounded organelle; P:primary metabolic process; C:cytoplasmic part; P:cellular metabolic process
ESTAGB1WB000346	F:actin binding
ESTAGB1WB000348	P:glycosaminoglycan biosynthetic process; C:Golgi medial cisterna; F:UDP-galactose:beta-N-acetylglucosamine beta-1,3-galactosyltransferase activity; C:membrane
ESTAGB1WB000349	C:cytosol; P:positive regulation of growth rate; P:embryonic development ending in birth or egg hatching; C:RNA-induced silencing complex; F:hydrolase activity; C:nucleus; P:gene silencing by miRNA
ESTAGB1WB000353	P:mitotic spindle elongation; F:structural constituent of ribosome; F:protein binding; C:cytosolic large ribosomal subunit; P:translation; P:ribosome biogenesis
ESTAGB1WB000354	P:regulation of cell shape; F:protein kinase activity; P:mRNA stabilization; F:ATP binding; P:cell adhesion; C:cytoplasm; C:nucleus; P:protein amino acid phosphorylation
ESTAGB1WB000357	C:Golgi cisterna membrane; F:transferase activity, transferring hexosyl groups
ESTAGB1WB000359	P:proteolysis; F:serine-type endopeptidase activity; F:catalytic activity; F:peptidase activity
ESTAGB1WB000378	F:DNA-directed RNA polymerase activity; P:regulation of actin filament polymerization; C:Arp2/3 protein complex; P:regulation of cell shape; P:cortical actin cytoskeleton organization; F:actin binding; C:cytoplasm; P:cell projection assembly; C:nucleolus; P:purine base metabolic process; P:pyrimidine base metabolic process; P:transcription, DNA-dependent
ESTAGB1WB000383	F:binding; F:transferase activity; P:metabolic process; F:catalytic activity
ESTAGB1WB000384	P:DNA recombination; P:DNA repair; P:cell growth; F:5'-3' exoribonuclease activity; C:nucleolus; F:metal ion binding; P:spermatogenesis; F:protein binding; P:microtubule-based process; P:transcription; P:regulation of RNA metabolic process
ESTAGB1WB000385	P:axonogenesis; F:molecular_function; C:cellular_component
ESTAGB1WB000386	F:nucleic acid binding; C:intracellular
ESTAGB1WB000390	C:guanylate cyclase complex, soluble; F:guanylate cyclase activity; F:metal ion binding; P:nitric oxide mediated signal transduction; F:receptor activity; F:nucleotide binding; P:blood circulation; P:purine base metabolic process; P:cGMP biosynthetic process; P:GTP metabolic process
ESTAGB1WB000393	C:flotillin complex
ESTAGB1WB000397	P:cell cycle arrest; P:gastrulation; P:cyclin catabolic process; C:cullin-RING ubiquitin ligase complex; F:ubiquitin protein ligase binding; P:trophectodermal cellular morphogenesis; P:induction of apoptosis by intracellular signals; P:G1/S transition of mitotic cell cycle; P:positive regulation of cell proliferation; F:cyclin binding; C:Golgi apparatus; C:nucleus
ESTAGB1WB000400	F:metal ion binding; F:hydrolase activity, acting on carbon-nitrogen (but not peptide) bonds, in linear amidines
ESTAGB1WB000423	C:nucleolus; P:RNA splicing; F:nucleic acid binding; C:small nucleolar ribonucleoprotein complex; F:RNA splicing factor activity, transesterification mechanism; F:protein binding; P:rRNA processing
ESTAGB1WB000425	C:integral to membrane; C:mitochondrial membrane
ESTAGB1WB000426	C:cytoskeleton; P:cellular process
ESTAGB1WB000428	C:lipid particle; F:4 iron, 4 sulfur cluster binding; F:aconitate hydratase activity; C:mitochondrion; P:reductive tricarboxylic acid cycle; P:glyoxylate metabolic process
ESTAGB1WB000432	P:rRNA processing; P:methylation; F:methyltransferase activity
ESTAGB1WB000450	C:cytosol; C:eukaryotic translation initiation factor 2B complex; F:enzyme regulator activity; F:translation initiation factor activity; C:ribosome; P:regulation of translational initiation
ESTAGB1WB000461	P:proteolysis; F:cysteine-type peptidase activity
ESTAGB1WB000465	F:binding; F:catalytic activity
ESTAGB1WB000466	F:zinc ion binding; F:nucleic acid binding
ESTAGB1WB000467	F:metal ion binding; P:protein processing; C:mitochondrial matrix; F:catalytic activity
ESTAGB1WB000470	F:tetracycline:hydrogen antiporter activity; P:response to antibiotic; C:integral to membrane; C:membrane; P:tetracycline transport; F:transporter activity; P:transport
ESTAGB1WB000476	F:binding
ESTAGB1WB000477	P:ubiquinone biosynthetic process; F:transferase activity
ESTAGB1WB000478	F:metal ion binding; P:oxidation reduction; F:electron carrier activity; F:oxidoreductase activity; F:heme binding; F:iron ion binding; F:monooxygenase activity; F:quinine 3-monooxygenase activity
ESTAGB1WB000479	F:catalytic activity
ESTAGB1WB000487	P:bicoid mRNA localization; P:regulation of pole plasm oskar mRNA localization; C:cytoplasm
ESTAGB1WB000497	C:extracellular region; F:chitin binding; F:chitin deacetylase activity; F:receptor activity; P:chitin metabolic process; P:signal transduction
ESTAGB1WB000500	P:activation of MAPKK activity; C:late endosome; F:kinase activator activity; F:protein binding
ESTAGB1WB000501	F:molecular_function; C:cellular_component
ESTAGB1WB000507	F:nucleic acid binding; P:imaginal disc-derived wing morphogenesis; F:zinc ion binding; C:intracellular; C:nucleus
ESTAGB1WB000516	F:hydrolase activity, hydrolyzing O-glycosyl compounds; F:binding; P:carbohydrate metabolic process
ESTAGB1WB000524	F:molecular_function; P:biological_process
ESTAGB1WB000531	F:zinc ion binding; F:ATP-dependent DNA helicase activity; P:nucleosome mobilization; P:chromatin assembly or disassembly; P:muscle organ development; F:transcription repressor activity; F:DNA binding; F:ATP binding; C:polytene chromosome; C:NuRD complex; F:nucleosome binding; C:chromatin; F:protein binding; P:dendrite morphogenesis; C:replication fork; P:negative regulation of transcription
ESTAGB1WB000532	F:nucleic acid binding; P:nucleobase, nucleoside, nucleotide and nucleic acid metabolic process; C:nuclear exosome (RNase complex); P:RNA processing; C:intracellular; F:3'-5' exonuclease activity
ESTAGB1WB000534	C:Golgi apparatus; P:transport; C:cytoplasmic vesicle
ESTAGB1WB000535	P:primary sex determination, soma; P:regulation of alternative nuclear mRNA splicing, via spliceosome; F:RNA splicing factor activity, transesterification mechanism; C:nucleus
ESTAGB1WB000542	P:cytokinesis; F:GTPase activity; F:GTP binding
ESTAGB1WB000543	C:mitochondrial large ribosomal subunit; F:structural constituent of ribosome; P:translation; P:ribosome biogenesis
ESTAGB1WB000545	C:nucleus; P:response to stress
ESTAGB1WB000556	P:cellular process; F:protein binding
ESTAGB1WB000557	C:cytoplasm; P:biological regulation; P:nervous system development; P:cellular process
ESTAGB1WB000559	F:transporter activity; C:intracellular; P:transport
ESTAGB1WB000564	F:molecular_function; F:binding; P:biological_process
ESTAGB1WB000576	P:mitotic cell cycle; F:metal ion binding; F:protein tyrosine/serine/threonine phosphatase activity; P:protein amino acid dephosphorylation
ESTAGB1WB000579	F:long-chain-enoyl-CoA hydratase activity; F:acetyl-CoA C-acyltransferase activity; C:mitochondrial inner membrane; C:fatty acid beta-oxidation multienzyme complex; F:NAD or NADH binding; F:3-hydroxyacyl-CoA dehydrogenase activity; P:fatty acid beta-oxidation; P:response to drug; F:long-chain-3-hydroxyacyl-CoA dehydrogenase activity; F:enoyl-CoA hydratase activity; P:isoleucine catabolic process;…
ESTAGB1WB000586	C:ribosome; F:structural constituent of ribosome; P:translation; C:mitochondrion; P:ribosome biogenesis
ESTAGB1WB000587	F:nucleic acid binding; F:helicase activity; F:ATP binding; F:nucleotide binding; F:hydrolase activity; F:ATP-dependent helicase activity
ESTAGB1WB000589	P:regulation of transcription from RNA polymerase II promoter; F:RNA polymerase II transcription mediator activity; C:transcription factor complex
ESTAGB1WB000590	F:copper uptake transmembrane transporter activity; C:integral to membrane; P:response to metal ion; F:copper ion transmembrane transporter activity; P:copper ion transport
ESTAGB1WB000595	P:cellular alcohol metabolic process; F:oxidoreductase activity, acting on CH-OH group of donors; F:FAD binding
ESTAGB1WB000602	C:mitochondrion; P:protein transport
ESTAGB1WB000611	F:Notch binding; P:regulation of R8 cell spacing in compound eye; P:negative regulation of neurogenesis; P:dorsal/ventral lineage restriction, imaginal disc; C:endocytic vesicle; P:actin filament organization; P:negative regulation of terminal cell fate specification, open tracheal system; P:ectodermal cell fate specification; P:mesodermal cell fate specification; P:immune response; P:oocyte ante…
ESTAGB1WB000630	C:ribosome; F:structural constituent of ribosome; P:translation; P:ribosome biogenesis
ESTAGB1WB000652	C:membrane; P:spermatogenesis
ESTAGB1WB000656	F:structural constituent of cuticle
ESTAGB1WB000665	P:translation; C:cytoplasm; F:translation initiation factor activity; P:regulation of translational initiation; C:eukaryotic translation initiation factor 3 complex
ESTAGB1WB000671	F:translation elongation factor activity; F:mRNA binding; C:transcriptional repressor complex; P:negative regulation of transcription; C:ribosome; P:regulation of translational elongation
ESTAGB1WB000674	F:metal ion binding; P:oxidation reduction; F:ecdysone 20-monooxygenase activity; F:oxidoreductase activity; F:electron carrier activity; F:heme binding; F:iron ion binding; F:monooxygenase activity
ESTAGB1WB000675	P:apoptosis; F:ATP-dependent RNA helicase activity; F:nucleic acid binding; P:establishment of cell polarity; P:nervous system development; F:ATP binding; C:nucleus; F:zinc ion binding
ESTAGB1WB000676	P:central nervous system development; P:nuclear migration; P:terminal branching, open tracheal system; P:compound eye morphogenesis; P:chitin-based cuticle development; F:protein binding; C:nuclear envelope; P:digestive tract morphogenesis; C:lipid particle; P:gonad morphogenesis; C:intermediate filament; P:mitotic nuclear envelope reassembly
ESTAGB1WB000682	C:integral to membrane; F:hydrolase activity; C:membrane; P:biological_process
ESTAGB1WB000686	F:GTP binding; F:protein binding; P:cell cycle; C:centrosome; F:GTPase inhibitor activity; P:small GTPase mediated signal transduction; P:tubulin complex assembly; C:mitochondrial outer membrane translocase complex
ESTAGB1WB000688	P:sphingolipid metabolic process; F:hydrolase activity; C:membrane
ESTAGB1WB000702	F:chitin binding; P:chitin metabolic process; C:extracellular region
ESTAGB1WB000709	F:helicase activity; F:binding
ESTAGB1WB000711	P:biological_process; C:ribosome
ESTAGB1WB000719	P:regulation of alternative nuclear mRNA splicing, via spliceosome; F:RNA binding; C:nucleus
ESTAGB1WB000726	C:cytoplasm; C:nucleus; F:protein binding; P:cell proliferation
ESTAGB1WB000736	F:nucleic acid binding; F:nucleotide binding
ESTAGB1WB000738	C:intracellular membrane-bounded organelle; C:cytoplasmic part
ESTAGB1WB000754	F:zinc ion binding; C:mitochondrial inner membrane; P:modification-dependent protein catabolic process; P:spermatogenesis; F:ubiquitin-protein ligase activity; P:protein ubiquitination; F:protein binding; F:heme binding; P:regulation of mitotic metaphase/anaphase transition; C:anaphase-promoting complex
ESTAGB1WB000757	C:mitochondrial inner membrane; F:transmembrane transporter activity; P:proton transport
ESTAGB1WB000759	C:cytoplasm; F:chromatin binding; F:protein binding; C:nuclear chromatin
ESTAGB1WB000763	F:binding; P:cytokinesis, completion of separation; F:protein kinase activity; P:cytokinesis, contractile ring formation; P:regulation of actin cytoskeleton organization; P:cytokinesis after mitosis; C:contractile ring; P:establishment or maintenance of chromatin architecture
ESTAGB1WB000765	F:ubiquitin protein ligase binding; C:cullin-RING ubiquitin ligase complex; P:ubiquitin-dependent protein catabolic process
ESTAGB1WB000769	P:proteasome assembly; P:RNA elongation from RNA polymerase II promoter; F:proteasome activator activity; C:proteasome activator complex
ESTAGB1WB000771	C:retromer complex; P:protein transport; C:cytoplasm; P:vacuolar transport
ESTAGB1WB000775	F:nucleic acid binding; F:helicase activity; F:ATP binding
ESTAGB1WB000777	F:protein binding
ESTAGB1WB000779	P:lipid metabolic process
ESTAGB1WB000780	F:FAD binding; P:oxidation reduction; F:acyl-CoA dehydrogenase activity; F:electron carrier activity; P:electron transport chain
ESTAGB1WB000793	F:binding
ESTAGB1WB000798	P:mitotic cell cycle; P:regulation of DNA replication initiation; P:DNA unwinding during replication; P:regulation of transcription; C:MCM complex; P:cell division; F:DNA binding; F:ATP binding; C:chromatin; F:ATPase activity; F:protein binding; P:negative regulation of apoptosis; F:chromatin binding
ESTAGB1WB000800	F:GTPase activator activity; P:regulation of small GTPase mediated signal transduction; P:small GTPase mediated signal transduction; P:signal transduction; F:Ras GTPase activator activity; F:protein binding; C:intracellular
ESTAGB1WB000805	C:Golgi apparatus; F:protein binding; P:microtubule-based process; C:cytoplasmic dynein complex; F:microtubule motor activity; C:microtubule
ESTAGB1WB000809	C:mitochondrion
ESTAGB1WB000815	P:translation; F:ligase activity
ESTAGB1WB000817	P:metabolic process; F:N-acetyltransferase activity
ESTAGB1WB000819	P:regulation of alternative nuclear mRNA splicing, via spliceosome; C:nucleus; C:cytosol
ESTAGB1WB000830	F:binding
ESTAGB1WB000831	P:ventral cord development; P:Wnt receptor signaling pathway; P:establishment of endothelial blood-brain barrier; F:signal transducer activity; P:G-protein coupled receptor protein signaling pathway; P:heart development; P:septate junction assembly; C:heterotrimeric G-protein complex; P:cortical actin cytoskeleton organization; P:asymmetric cell division; F:GTPase activity; P:establishment of ima…
ESTAGB1WB000833	F:binding; P:metabolic process; F:catalytic activity
ESTAGB1WB000834	C:integral to membrane; C:membrane
ESTAGB1WB000837	C:intracellular; F:GTP binding
ESTAGB1WB000838	F:ATP-dependent DNA helicase activity; F:single-stranded DNA specific endodeoxyribonuclease activity; P:DNA replication; F:DNA binding; F:ATP binding; C:replication fork; P:DNA catabolic process
ESTAGB1WB000839	P:carbohydrate metabolic process; F:malate dehydrogenase activity; F:oxidoreductase activity, acting on the CH-OH group of donors, NAD or NADP as acceptor; P:tricarboxylic acid cycle
ESTAGB1WB000843	P:proteolysis; F:serine-type endopeptidase activity; C:cytoplasm; F:serine-type peptidase activity; F:hydrolase activity
ESTAGB1WB000847	P:nucleotide-excision repair, DNA damage removal; P:cell cycle checkpoint; F:damaged DNA binding; F:protein binding; C:nucleoplasm; C:cytoplasm; P:protein ubiquitination during ubiquitin-dependent protein catabolic process
ESTAGB1WB000855	F:transcription activator activity; F:protein binding; F:transcription factor activity; C:cyclin-dependent protein kinase activating kinase holoenzyme complex; C:cytoplasm; P:transcription from RNA polymerase II promoter; P:positive regulation of transcription; C:transcription factor complex
ESTAGB1WB000862	C:clathrin coat of coated pit; P:synaptic vesicle coating; C:clathrin coat of synaptic vesicle; C:clathrin coat of trans-Golgi network vesicle; P:neurotransmitter secretion; F:protein binding; P:intracellular protein transport; F:structural molecule activity; C:lipid particle; P:dsRNA transport
ESTAGB1WB000863	P:metabolic process; F:catalytic activity
ESTAGB1WB000865	C:cytoplasm; F:polyubiquitin binding; F:ATPase binding; C:proteasome complex
ESTAGB1WB000876	F:protein binding; P:multicellular organismal development; C:intracellular part
ESTAGB1WB000877	F:hydrolase activity
ESTAGB1WB000878	F:nucleic acid binding; C:nucleolus; P:regulation of transcription, DNA-dependent; C:nuclear speck; F:protein domain specific binding
ESTAGB1WB000883	F:methyltransferase activity; F:transferase activity
ESTAGB1WB000885	P:ubiquitin-dependent protein catabolic process; F:ubiquitin thiolesterase activity; P:protein deubiquitination
ESTAGB1WB000889	F:nuclease activity; C:nuclear part; C:exosome (RNase complex)
ESTAGB1WB000899	P:transport; F:ADP-ribosylation factor binding; P:cellular process; C:membrane; C:trans-Golgi network
ESTAGB1WB000911	F:ATP binding; F:ATPase activity; F:nucleotide binding; C:membrane; F:ATPase activity, coupled to transmembrane movement of substances; F:nucleoside-triphosphatase activity; F:transporter activity; P:transport
ESTAGB1WB000915	C:mitochondrial inner membrane; F:metalloendopeptidase activity; F:ATP binding; C:integral to membrane; F:nucleoside-triphosphatase activity; P:proteolysis; F:zinc ion binding
ESTAGB1WB000916	F:protein binding
ESTAGB1WB000921	P:cellular process
ESTAGB1WB000927	F:ligase activity; P:cellular amino acid biosynthetic process
ESTAGB1WB000932	F:retinoid X receptor binding; P:vasculature development; C:cytoplasm; P:anti-apoptosis; P:organelle organization; P:response to hormone stimulus; C:chromosome passenger complex; P:positive regulation of cell cycle; C:transcription factor complex; P:signal transduction
ESTAGB1WB000935	F:aspartate-tRNA ligase activity; F:nucleotide binding; P:aspartyl-tRNA aminoacylation; P:alanine metabolic process; P:aspartate metabolic process
ESTAGB1WB000936	F:molecular_function; C:cellular_component
ESTAGB1WB000944	F:tubulin-tyrosine ligase activity; P:protein modification process
ESTAGB1WB000954	C:lamellipodium; P:actin filament reorganization during cell cycle; P:phagocytosis, engulfment; P:regulation of actin filament polymerization; P:cytoplasmic transport, nurse cell to oocyte; F:actin binding; C:Arp2/3 protein complex; P:pseudocleavage during syncytial blastoderm formation; P:axonal fasciculation; P:ovarian ring canal stabilization; F:ATP binding; F:structural constituent of cytoske…
ESTAGB1WB000961	F:gamma-glutamyltransferase activity
ESTAGB1WB000963	F:calcium ion binding; F:calcium-dependent phospholipid binding
ESTAGB1WB000966	P:signal transduction; P:dsRNA transport
ESTAGB1WB000969	P:modification-dependent protein catabolic process; P:regulation of ubiquitin-protein ligase activity during mitotic cell cycle; F:protein binding; C:intracellular part
ESTAGB1WB000971	C:ATP-binding cassette (ABC) transporter complex; F:ATPase activity; F:ATP binding; F:transporter activity; P:transport
ESTAGB1WB000980	F:metal ion binding; F:inositol tetrakisphosphate 1-kinase activity; C:intracellular; F:ATP binding; P:signal transduction; P:inositol trisphosphate metabolic process; F:inositol-1,3,4-trisphosphate 5/6-kinase activity
ESTAGB1WB000983	C:membrane
ESTAGB1WB000988	P:regulation of cell shape; P:compound eye morphogenesis; P:actin filament reorganization during cell cycle; P:phagocytosis, engulfment; P:axonal fasciculation; P:cortical actin cytoskeleton organization; F:actin binding; P:ovarian ring canal stabilization; P:cell projection assembly
ESTAGB1WB000989	P:tracheal outgrowth, open tracheal system; P:imaginal disc-derived wing morphogenesis; F:enzyme binding; P:torso signaling pathway; P:determination of anterior/posterior axis, embryo; C:cytoplasm; C:apical part of cell; C:plasma membrane; P:compound eye photoreceptor cell differentiation
ESTAGB1WB001004	F:RNA binding; F:exonuclease activity; C:nuclear exosome (RNase complex); P:RNA processing; F:3'-5'-exoribonuclease activity; C:cellular_component
ESTAGB1WB001006	F:transcription regulator activity; F:metal ion binding; P:cell redox homeostasis; F:protein complex binding; C:intracellular organelle part; C:cytoplasmic part; F:nuclease activity; C:nucleus; P:response to DNA damage stimulus; P:regulation of transcription
ESTAGB1WB001009	F:protein binding; C:intracellular part
ESTAGB1WB001013	P:DNA repair; F:zinc ion binding; F:endonuclease activity; F:protein binding; F:nuclease activity; C:intracellular
ESTAGB1WB001018	P:response to oxidative stress; F:protein binding; F:heme binding; F:peroxidase activity; P:metabolic process; P:peroxidase reaction
ESTAGB1WB001026	C:integral to membrane
ESTAGB1WB001032	P:translation; C:mitochondrial large ribosomal subunit; F:P-P-bond-hydrolysis-driven protein transmembrane transporter activity; C:mitochondrial inner membrane presequence translocase complex; P:intracellular protein transport; C:chloroplast envelope
ESTAGB1WB001035	F:binding
ESTAGB1WB001041	P:regulation of biological quality; F:oxidoreductase activity, acting on NADH or NADPH; F:binding; P:response to chemical stimulus; C:cytoplasmic part; P:cellular metabolic process
ESTAGB1WB001053	F:chitinase activity; P:chitin catabolic process; F:cation binding; F:chitin binding; C:extracellular region; P:cell wall macromolecule catabolic process
ESTAGB1WB001054	P:mitochondrion inheritance; C:cytosol; C:mitochondrion; P:salivary gland cell autophagic cell death; P:mitotic chromosome condensation; P:centrosome separation; P:spindle assembly involved in male meiosis
ESTAGB1WB001062	F:nucleoside-triphosphatase activity; P:protein refolding; P:protein targeting to mitochondrion; P:response to heat; F:ATP binding; C:mitochondrial matrix; F:unfolded protein binding; P:'de novo' protein folding; P:protein catabolic process; C:lipid particle; C:nucleus
ESTAGB1WB001066	C:cell part
ESTAGB1WB001074	C:holo TFIIH complex; F:general RNA polymerase II transcription factor activity; P:regulation of transcription from RNA polymerase II promoter
ESTAGB1WB001078	P:integrin-mediated signaling pathway; F:calcium ion binding
ESTAGB1WB001084	F:hydrolase activity, hydrolyzing O-glycosyl compounds; C:cytoplasmic membrane-bounded vesicle; P:carbohydrate metabolic process
ESTAGB1WB001087	F:protein binding; P:snRNA processing; C:integrator complex
ESTAGB1WB001091	C:integral to membrane; P:bile acid metabolic process; P:glucosylceramide catabolic process; P:O-glycoside catabolic process; F:glucosylceramidase activity; F:beta-glucosidase activity; P:nitrogen compound metabolic process
ESTAGB1WB001098	P:head involution; P:negative regulation of growth; P:cell death; P:regulation of signal transduction
ESTAGB1WB001101	F:protein binding
ESTAGB1WB001104	C:cytoplasm; C:nucleus; F:zinc ion binding; F:protein binding
ESTAGB1WB001108	P:RNA processing; C:intracellular
ESTAGB1WB001114	F:protein binding
ESTAGB1WB001115	F:1-acylglycerol-3-phosphate O-acyltransferase activity; F:acyltransferase activity; F:transferase activity; P:metabolic process; P:phospholipid biosynthetic process; C:membrane
ESTAGB1WB001117	F:hydrolase activity
ESTAGB1WB001120	F:RNA binding; P:cystoblast division; P:regulation of cell cycle; P:regulation of alternative nuclear mRNA splicing, via spliceosome; P:mRNA splice site selection; C:nucleus
ESTAGB1WB001125	P:nucleotide metabolic process; F:potassium ion binding; P:oxidation reduction; F:GMP reductase activity; P:purine base metabolic process
ESTAGB1WB001128	P:metal ion transport; C:membrane; F:metal ion transmembrane transporter activity; F:protein binding
ESTAGB1WB001133	F:molecular_function; C:cellular_component
ESTAGB1WB001140	F:binding
ESTAGB1WB001141	F:receptor activity
ESTAGB1WB001155	F:hydrolase activity; F:transferase activity
ESTAGB1WB001162	C:protein complex; C:intracellular part
ESTAGB1WB001167	P:determination of adult life span; P:synaptic vesicle coating; P:regulation of alternative nuclear mRNA splicing, via spliceosome; C:synaptic vesicle; C:clathrin adaptor complex; P:ommochrome biosynthetic process; P:neurotransmitter secretion; F:protein binding; P:intracellular protein transport; P:lysosome organization; C:Golgi apparatus; C:nucleus
ESTAGB1WB001170	P:neuropeptide signaling pathway; C:extracellular region
ESTAGB1WB001174	P:aerobic respiration; C:mitochondrial inner membrane; F:copper ion binding; F:electron carrier activity; F:heme binding; C:integral to membrane; F:cytochrome-c oxidase activity; P:electron transport chain; P:mitochondrial electron transport, cytochrome c to oxygen; P:proton transport; C:respiratory chain complex IV
ESTAGB1WB001192	F:GTP binding; F:protein binding; F:GTPase activity
ESTAGB1WB001197	F:hydrolase activity, acting on ester bonds; C:cytoplasmic vesicle
ESTAGB1WB001198	C:cytosol; P:mitotic sister chromatid segregation; P:negative regulation of ubiquitin-protein ligase activity during mitotic cell cycle; C:nucleolus; P:anaphase-promoting complex-dependent proteasomal ubiquitin-dependent protein catabolic process; C:kinetochore; F:protein binding; P:cell proliferation; P:mitotic cell cycle checkpoint
ESTAGB1WB001216	F:sequence-specific DNA binding; F:transcription factor activity; F:zinc ion binding; P:regulation of transcription, DNA-dependent; C:transcription factor complex
ESTAGB1WB001217	F:calcium ion binding
ESTAGB1WB001224	C:cytoplasm; F:transcription regulator activity; P:regulation of transcription; F:protein binding; C:nucleus
ESTAGB1WB001229	P:small GTPase mediated signal transduction
ESTAGB1WB001230	C:nuclear lumen; F:transcription regulator activity; P:positive regulation of gene expression; F:protein binding; F:DNA binding; P:regulation of transcription; P:cell cycle
ESTAGB1WB001233	F:molecular_function; C:cellular_component
ESTAGB1WB001235	P:mRNA cleavage; C:cytosol; C:mRNA cap binding complex; P:spliceosomal snRNP biogenesis; C:nuclear cap binding complex; P:positive regulation of mRNA 3'-end processing; F:RNA cap binding; F:protein binding; C:nucleoplasm
ESTAGB1WB001237	P:maintenance of DNA methylation; F:zinc ion binding; P:gene silencing; C:centromeric heterochromatin; F:transcription repressor activity; F:DNA binding; F:protein binding; C:replication fork; P:regulation of cell proliferation; P:negative regulation of transcription, DNA-dependent; F:DNA (cytosine-5-)-methyltransferase activity; C:transcriptional repressor complex; P:methionine metabolic process
ESTAGB1WB001247	F:carnitine O-palmitoyltransferase activity; F:ATP binding; C:mitochondrion; P:fatty acid metabolic process; P:acyl-carrier-protein biosynthetic process; P:glycerolipid metabolic process
ESTAGB1WB001250	F:protein binding; P:insulin-like growth factor receptor signaling pathway
ESTAGB1WB001254	P:positive regulation of NFAT protein import into nucleus; F:protein transmembrane transporter activity; C:nuclear pore
ESTAGB1WB001263	P:TMP biosynthetic process; P:nucleoside diphosphate phosphorylation; F:thymidine kinase activity; C:mitochondrion; P:pyrimidine base metabolic process
ESTAGB1WB001264	F:kinase activity; C:membrane; C:membrane fraction; C:perinuclear region of cytoplasm; C:Golgi apparatus; F:zinc ion binding; F:protein binding; P:transport
ESTAGB1WB001272	P:olfactory learning
ESTAGB1WB001273	F:aldehyde dehydrogenase (NAD) activity; P:oxidation reduction; C:mitochondrion; P:gluconeogenesis; P:glycolysis; P:arginine metabolic process; P:histidine metabolic process; P:isoleucine catabolic process; P:leucine catabolic process; P:lysine catabolic process; P:proline metabolic process; P:tryptophan metabolic process; P:valine catabolic process; P:fatty acid metabolic process; P:bile acid bi…
ESTAGB1WB001280	F:GTP binding; C:protein complex; P:protein polymerization; F:nucleotide binding
ESTAGB1WB001282	P:mitotic cell cycle; F:phosphoprotein phosphatase activity; P:protein amino acid dephosphorylation
ESTAGB1WB001287	P:response to oxidative stress; F:iron ion binding; F:peroxidase activity; P:metabolic process; P:peroxidase reaction
ESTAGB1WB001292	F:transferase activity; P:metabolic process; F:N-acetyltransferase activity
ESTAGB1WB001298	P:embryonic skeletal system morphogenesis; P:embryonic hindlimb morphogenesis; P:embryonic forelimb morphogenesis; P:positive regulation of transcription from RNA polymerase II promoter; P:regulation of apoptosis; C:transcription factor complex; P:muscle organ development; F:sequence-specific DNA binding; F:transcription factor activity; F:protein heterodimerization activity; P:palate development…
ESTAGB1WB001301	C:polytene chromosome chromocenter; F:mRNA 3'-UTR binding; P:chromosome condensation; P:chromosome segregation; P:positive regulation of translation; P:heterochromatin formation; C:heterochromatin; F:single-stranded DNA binding; C:ribonucleoprotein complex; C:lipid particle; C:nucleus; F:satellite DNA binding
ESTAGB1WB001309	F:transporter activity; C:intracellular; P:transport
ESTAGB1WB001312	P:metabolic process; F:oxidoreductase activity, acting on the CH-CH group of donors; C:lipid particle
ESTAGB1WB001322	F:nucleic acid binding; F:methyltransferase activity; F:nucleotide binding; P:metabolic process
ESTAGB1WB001328	C:mitochondrial large ribosomal subunit
ESTAGB1WB001329	P:defense response to bacterium; P:cytokine-mediated signaling pathway; P:response to oxidative stress; F:electron carrier activity; F:heme binding; P:oxidation reduction; F:calcium ion binding; F:peroxidase activity; P:cuticle development; C:integral to membrane; F:FAD binding; P:response to cAMP; P:electron transport chain; P:peroxidase reaction
ESTAGB1WB001330	F:chromatin binding; C:chromatin; P:chromatin assembly or disassembly; C:nucleus
ESTAGB1WB001334	F:binding
ESTAGB1WB001337	F:chaperone binding; F:ATP binding
ESTAGB1WB001338	F:transcription factor binding; F:protein homodimerization activity; P:negative regulation of transcription, DNA-dependent; C:cytoplasm; C:transcription factor complex
ESTAGB1WB001344	C:cytoplasmic part; F:binding; C:intracellular membrane-bounded organelle
ESTAGB1WB001345	F:snoRNA binding; P:rRNA pseudouridine synthesis; C:small nucleolar ribonucleoprotein complex; C:nucleus; F:rRNA pseudouridylation guide activity
ESTAGB1WB001348	P:cellular alcohol metabolic process; F:oxidoreductase activity, acting on CH-OH group of donors; F:FAD binding
ESTAGB1WB001349	C:polytene chromosome puff; F:nucleic acid binding; C:polytene chromosome interband; P:fertilization, exchange of chromosomal proteins; P:imaginal disc-derived wing morphogenesis; F:helicase activity; P:oogenesis
ESTAGB1WB001353	C:spliceosome complex; P:anti-apoptosis; F:fibroblast growth factor binding
ESTAGB1WB001361	C:cytoskeleton; P:regulation of actin filament polymerization; F:actin binding
ESTAGB1WB001362	F:metal ion binding; F:zinc ion binding; F:protein binding; C:intracellular
ESTAGB1WB001368	P:regulation of transcription, DNA-dependent; F:molecular_function; C:endoplasmic reticulum; P:regulation of transcription; F:zinc ion binding; F:transcription factor activity; C:nucleus
ESTAGB1WB001372	P:positive regulation of growth rate; P:determination of adult life span; P:embryonic development ending in birth or egg hatching; P:positive regulation of endocytosis; P:reduction of cytosolic calcium ion concentration; F:ATPase activity, coupled to transmembrane movement of ions, phosphorylative mechanism; F:calcium ion transmembrane transporter activity; P:nematode larval development; P:calciu…
ESTAGB1WB001374	C:eukaryotic translation initiation factor 3 complex; P:regulation of translational initiation; F:translation initiation factor activity; C:ribosome
ESTAGB1WB001382	F:transmembrane receptor activity; C:integral to membrane; C:membrane; F:G-protein coupled receptor activity; P:neuropeptide signaling pathway; P:cell surface receptor linked signal transduction; P:signal transduction; F:receptor activity; F:signal transducer activity; F:protein binding; P:G-protein coupled receptor protein signaling pathway; C:plasma membrane
ESTAGB1WB001391	P:axon extension
ESTAGB1WB001398	F:GTP binding; F:nucleotide binding; C:intracellular
ESTAGB1WB001404	P:cytoskeletal anchoring at plasma membrane; P:establishment or maintenance of cell polarity; C:cell-substrate junction; C:catenin complex; F:cadherin binding; P:cell adhesion; P:oocyte localization during germarium-derived egg chamber formation; F:actin binding; C:actin cytoskeleton; F:structural molecule activity; C:spot adherens junction
ESTAGB1WB001406	C:mitochondrion; P:biological_process
ESTAGB1WB001414	C:cytoplasm; P:negative regulation of signal transduction
ESTAGB1WB001426	C:cytoplasm; C:soluble fraction; P:isoleucyl-tRNA aminoacylation; F:isoleucine-tRNA ligase activity; F:nucleotide binding; P:isoleucine biosynthetic process; P:leucine biosynthetic process; P:valine biosynthetic process
ESTAGB1WB001428	P:axon guidance; P:female meiosis chromosome segregation; F:microtubule binding; P:negative regulation of axon extension; F:actin filament binding; C:tubulin complex
ESTAGB1WB001435	C:integral to membrane
ESTAGB1WB001438	C:intracellular part
ESTAGB1WB001448	P:histone methylation; C:cytoplasm; F:protein-arginine omega-N asymmetric methyltransferase activity; P:peptidyl-arginine methylation, to asymmetrical-dimethyl arginine; F:histone methyltransferase activity; F:protein-arginine omega-N monomethyltransferase activity
ESTAGB1WB001449	F:binding; P:metabolic process; F:catalytic activity
ESTAGB1WB001454	C:nucleolus; P:mRNA polyadenylation; F:RNA binding; F:protein binding; P:nuclear mRNA splicing, via spliceosome; P:mRNA cleavage; F:nucleotide binding
ESTAGB1WB001468	F:3-hydroxyacyl-CoA dehydrogenase activity; P:oxidation reduction; F:coenzyme binding; C:mitochondrion; P:isoleucine catabolic process; P:leucine catabolic process; P:lysine catabolic process; P:tryptophan metabolic process; P:valine catabolic process; P:fatty acid biosynthetic process; P:benzoate metabolic process
ESTAGB1WB001469	F:oxidoreductase activity, acting on CH-OH group of donors; P:cellular alcohol metabolic process; F:FAD binding
ESTAGB1WB001471	F:transferase activity, transferring glycosyl groups; C:cell part
ESTAGB1WB001478	P:peptidyl-lysine modification to hypusine
ESTAGB1WB001485	F:cytoskeletal protein binding; P:regulation of synapse organization; C:cytoplasmic part
ESTAGB1WB001489	F:metal ion binding; F:oxidoreductase activity; C:cell part
ESTAGB1WB001490	C:cytoplasm; P:dendrite morphogenesis; P:microtubule-based movement; C:dynein complex; F:motor activity; P:mushroom body development; F:ATPase activity, coupled; C:microtubule
ESTAGB1WB001496	F:binding
ESTAGB1WB001500	F:binding
ESTAGB1WB001511	F:G-protein coupled receptor activity; P:phototransduction; P:protein-chromophore linkage; P:G-protein coupled receptor protein signaling pathway; F:photoreceptor activity; C:integral to membrane
ESTAGB1WB001513	F:metal ion binding
ESTAGB1WB001517	F:peptidase activity; F:extracellular matrix structural constituent; P:extracellular matrix organization; C:proteinaceous extracellular matrix
ESTAGB1WB001519	F:signal transducer activity; P:positive regulation of I-kappaB kinase/NF-kappaB cascade; F:nucleoside-diphosphatase activity; C:endoplasmic reticulum membrane; P:ribonucleoside diphosphate catabolic process
ESTAGB1WB001545	F:molecular_function; C:cellular_component
ESTAGB1WB001556	F:nucleic acid binding; F:nucleotide binding; F:RNA helicase activity
ESTAGB1WB001557	F:DNA-directed RNA polymerase activity; F:4-hydroxybenzoate octaprenyltransferase activity; P:determination of adult life span; P:polyprenol biosynthetic process; C:mitochondrial inner membrane; P:transcription from RNA polymerase III promoter; P:ubiquinone biosynthetic process; C:DNA-directed RNA polymerase III complex; C:nucleolus; P:purine base metabolic process; P:pyrimidine base metabolic pr…
ESTAGB1WB001569	P:regulation of cellular process
ESTAGB1WB001588	F:metal ion binding
ESTAGB1WB001590	F:RNA polymerase II transcription mediator activity; P:transcription; P:regulation of transcription; C:nucleus
ESTAGB1WB001595	C:chromosomal part; F:binding; F:catalytic activity
ESTAGB1WB001597	P:proteolysis; F:serine-type endopeptidase activity; C:plasma membrane
ESTAGB1WB001598	F:structural constituent of ribosome; C:small ribosomal subunit; P:translation; P:ribosome biogenesis
ESTAGB1WB001601	C:microtubule organizing center; P:actin filament organization; F:actin binding; P:cell motility; C:nucleus; C:actin cytoskeleton; C:cell projection
ESTAGB1WB001602	C:membrane; F:glucose transmembrane transporter activity; P:glucose transport
ESTAGB1WB001607	F:mRNA 5'-UTR binding; C:nucleoplasm; P:regulation of nuclear mRNA splicing, via spliceosome; F:nucleotide binding; F:mRNA 3'-UTR binding; P:regulation of pole plasm oskar mRNA localization; P:positive regulation of translation; C:nucleolus; P:negative regulation of oskar mRNA translation; P:border follicle cell migration; C:ribonucleoprotein complex
ESTAGB1WB001608	P:positive regulation of growth rate; P:embryonic development ending in birth or egg hatching; P:nematode larval development; F:nucleotide binding; F:aminoacyl-tRNA ligase activity; P:tRNA aminoacylation for protein translation
ESTAGB1WB001609	F:protein binding; P:transcription
ESTAGB1WB001611	P:response to hypoxia; P:localization; C:cytosol; F:RNA binding; F:calcium ion binding; F:virion binding; P:anti-apoptosis; C:microsome; C:endoplasmic reticulum lumen; F:low-density lipoprotein receptor binding; C:perinuclear region of cytoplasm; C:endoplasmic reticulum membrane; C:virion; P:signal transduction
ESTAGB1WB001613	C:eukaryotic translation initiation factor 3 complex; F:translation initiation factor activity; C:ribosome; P:regulation of translational initiation
ESTAGB1WB001628	P:DNA replication; F:ATP binding; P:DNA replication initiation; F:nucleotide binding; F:nucleoside-triphosphatase activity; F:DNA binding; C:nucleus
ESTAGB1WB001630	F:dipeptidyl-peptidase activity
ESTAGB1WB001631	P:posterior midgut invagination; F:signal transducer activity; P:G-protein coupled receptor protein signaling pathway; P:regulation of embryonic cell shape; C:heterotrimeric G-protein complex; F:GTPase activity; P:ventral furrow formation; F:GTP binding
ESTAGB1WB001634	F:binding; F:hydrolase activity; C:intracellular part
ESTAGB1WB001636	P:ubiquitin-dependent protein catabolic process; P:regulation of synaptic transmission; P:regulation of cell cycle; C:cullin-RING ubiquitin ligase complex; F:ubiquitin protein ligase binding; P:negative regulation of synaptic growth at neuromuscular junction; C:anaphase-promoting complex
ESTAGB1WB001648	P:germ cell migration; P:isoprenoid biosynthetic process; P:embryonic heart tube development; F:transferase activity
ESTAGB1WB001651	C:integral to membrane; P:cAMP biosynthetic process; C:membrane; F:adenylate cyclase activity; P:transport
ESTAGB1WB001652	F:ligase activity; P:protein modification process; P:protein ubiquitination; P:modification-dependent protein catabolic process; C:intracellular; F:ubiquitin-protein ligase activity; F:acid-amino acid ligase activity; F:metal ion binding; F:binding
ESTAGB1WB001659	P:regulation of actin filament polymerization; C:cytoskeleton; F:ATP binding; C:cell projection; F:actin binding; C:cytoplasm
ESTAGB1WB001665	F:binding; F:peptidyl-prolyl cis-trans isomerase activity
ESTAGB1WB001673	C:polytene chromosome chromocenter
ESTAGB1WB001674	F:voltage-gated potassium channel activity; C:membrane; P:potassium ion transport; F:ion channel activity; F:protein binding; C:voltage-gated potassium channel complex
ESTAGB1WB001675	C:eukaryotic translation initiation factor 4F complex; F:protein binding; P:regulation of translational initiation; F:RNA cap binding
ESTAGB1WB001681	F:translation initiation factor activity; P:myelination; P:response to glucose stimulus; C:eukaryotic translation initiation factor 2B complex; F:guanyl-nucleotide exchange factor activity; P:response to heat; P:ovarian follicle development; P:response to peptide hormone stimulus; P:oligodendrocyte development; P:negative regulation of translational initiation in response to stress; F:translation…
ESTAGB1WB001684	C:transcription factor complex; P:negative regulation of transcription from RNA polymerase II promoter; F:transcription corepressor activity; F:ATPase activity; P:regulation of RNA polymerase II transcriptional preinitiation complex assembly; P:interspecies interaction between organisms; P:positive regulation of transcription, DNA-dependent; C:cytoplasm; P:DNA methylation
ESTAGB1WB001685	F:aminoacyl-tRNA ligase activity; P:tRNA aminoacylation for protein translation
ESTAGB1WB001692	F:ubiquitin thiolesterase activity; F:histone binding; P:histone deubiquitination; C:chromatin remodeling complex; F:metallopeptidase activity; F:ubiquitin-specific protease activity; F:transcription coactivator activity; P:positive regulation of transcription, DNA-dependent; P:ubiquitin-dependent protein catabolic process; C:transcription factor complex
ESTAGB1WB001708	F:nucleoside-triphosphatase activity; P:wing disc dorsal/ventral pattern formation; P:spermatid development; C:mitochondrial outer membrane; F:ATP binding; C:endoplasmic reticulum
ESTAGB1WB001718	C:cytoplasm; P:regulation of phosphorylation; F:protein binding
ESTAGB1WB001720	F:acyl-CoA dehydrogenase activity; P:response to starvation; P:carnitine metabolic process; P:liver development; P:cardiac muscle cell differentiation; P:response to cold; P:oxidation reduction; P:response to nutrient; F:electron carrier activity; P:response to glucocorticoid stimulus; P:fatty acid beta-oxidation; P:post-embryonic development; P:response to copper ion; F:isomerase activity; C:mit…
ESTAGB1WB001723	C:plasma membrane; F:beta-N-acetylglucosaminidase activity; P:carbohydrate metabolic process
ESTAGB1WB001724	F:protein binding; P:cellular biopolymer metabolic process; P:cell cycle; P:response to DNA damage stimulus; P:primary metabolic process
ESTAGB1WB001728	F:aminoacyl-tRNA ligase activity; P:tRNA aminoacylation for protein translation; F:nucleotide binding
ESTAGB1WB001732	P:lipopolysaccharide biosynthetic process
ESTAGB1WB001739	F:sequence-specific DNA binding; F:ecdysteroid hormone receptor activity; F:transcription factor activity; F:steroid binding; F:zinc ion binding; P:regulation of transcription, DNA-dependent; P:signal transduction; C:transcription factor complex
ESTAGB1WB001740	F:methyltransferase activity; F:transferase activity; P:metabolic process
ESTAGB1WB001741	F:CTP synthase activity; P:pyrimidine nucleotide biosynthetic process; F:nucleotide binding; P:pyrimidine base metabolic process
ESTAGB1WB001743	P:biological_process
ESTAGB1WB001745	C:mitochondrial inner membrane; C:integral to membrane; F:binding; P:transport; F:transmembrane transporter activity
ESTAGB1WB001750	P:imaginal disc-derived wing vein morphogenesis; P:hindgut morphogenesis; P:establishment of ommatidial polarity; C:cytoplasm; P:instar larval development; F:transcription activator activity; P:brain development; P:positive regulation of growth; F:sequence-specific DNA binding; F:motor activity; F:transcription factor activity; P:post-embryonic appendage morphogenesis; P:negative regulation of ge…
ESTAGB1WB001754	C:ribosome
ESTAGB1WB001766	P:DNA replication; C:nucleoplasm
ESTAGB1WB001778	F:binding
ESTAGB1WB001786	P:small GTPase mediated signal transduction; P:salivary gland cell autophagic cell death; P:endosome to lysosome transport; F:receptor activity; F:sphingomyelin phosphodiesterase activity; C:late endosome; P:endocytosis; F:GTPase activity; C:lipid particle; P:protein transport; F:GTP binding; P:dsRNA transport; P:glycosphingolipid metabolic process
ESTAGB1WB001795	F:DNA binding; F:protein binding; C:brahma complex; P:positive regulation of transcription, DNA-dependent
ESTAGB1WB001798	F:RNA binding
ESTAGB1WB001807	P:establishment or maintenance of chromatin architecture; F:nucleic acid binding; C:intracellular organelle; F:methyltransferase activity
ESTAGB1WB001811	P:inositol and derivative phosphorylation; F:calmodulin binding; F:calcium-dependent protein binding; F:inositol trisphosphate 3-kinase activity
ESTAGB1WB001819	C:intracellular; F:Rab GTPase activator activity; P:regulation of Rab GTPase activity
ESTAGB1WB001822	C:cytoplasm; P:inositol phosphate-mediated signaling; P:cellular water homeostasis; C:inclusion body; F:iron ion binding; P:oxidation reduction; F:aldo-keto reductase activity; P:membrane organization; F:oxidoreductase activity, acting on NADH or NADPH; P:inositol catabolic process; F:inositol oxygenase activity
ESTAGB1WB001828	F:acyltransferase activity; P:acyl-carrier-protein biosynthetic process
ESTAGB1WB001830	P:DNA metabolic process; F:DNA binding; C:intracellular organelle part; F:hydrolase activity; C:nucleus; P:response to DNA damage stimulus
ESTAGB1WB001842	P:dsRNA transport; P:intracellular transport; F:binding; P:determination of adult life span
ESTAGB1WB001846	F:binding; P:metabolic process; F:catalytic activity; P:cellular metabolic process; F:coenzyme binding
ESTAGB1WB001864	P:phosphate transport; F:high affinity inorganic phosphate:sodium symporter activity; F:inorganic phosphate transmembrane transporter activity; C:integral to membrane; P:cation transport
ESTAGB1WB001866	P:regulation of cell shape; F:protein binding; P:compound eye retinal cell programmed cell death; P:Wnt receptor signaling pathway; P:neuroblast fate commitment; P:heart development; P:oocyte localization during germarium-derived egg chamber formation; P:branch fusion, open tracheal system; P:cuticle pattern formation; C:zonula adherens; P:zonula adherens assembly; C:cytoplasm; F:transcription ac…
ESTAGB1WB001869	P:RNA splicing; C:spliceosome complex; F:protein binding; P:mRNA processing
ESTAGB1WB001872	P:modification-dependent protein catabolic process; P:protein modification process; C:intracellular; F:acid-amino acid ligase activity; F:protein binding
ESTAGB1WB001874	F:protein binding
ESTAGB1WB001881	C:cytoskeleton; C:nucleoplasm; F:protein binding; C:focal adhesion
ESTAGB1WB001889	P:gene silencing by miRNA; P:RNA interference
ESTAGB1WB001897	F:transition metal ion binding; F:oxidoreductase activity; F:transcription activator activity; F:protein binding; F:transcription factor activity; C:cyclin-dependent protein kinase activating kinase holoenzyme complex; C:cytoplasm; P:transcription from RNA polymerase II promoter; P:positive regulation of transcription; C:transcription factor complex
ESTAGB1WB001910	F:RNA binding; F:exonuclease activity; P:RNA processing; F:3'-5'-exoribonuclease activity
ESTAGB1WB001912	P:carbohydrate metabolic process; F:hydrolase activity, hydrolyzing O-glycosyl compounds; F:cation binding
ESTAGB1WB001915	P:primary metabolic process; P:cobalamin transport; P:nitrogen compound metabolic process; P:cellular metabolic process; F:cobalamin binding
ESTAGB1WB001923	P:sensory organ development; F:metal ion binding; P:oxidation reduction; F:oxidoreductase activity; F:electron carrier activity; F:heme binding; F:iron ion binding; F:monooxygenase activity
ESTAGB1WB001934	P:enucleate erythrocyte development; C:nuclear matrix; P:negative regulation of myeloid cell apoptosis; P:erythrocyte maturation; P:cytoskeleton organization; P:cell division; C:membrane fraction; P:cell adhesion; F:actin binding; C:spindle; C:contractile ring; C:integral to plasma membrane; P:regulation of mitotic cell cycle
ESTAGB1WB001935	F:receptor activity; P:signal transduction
ESTAGB1WB001939	P:cell redox homeostasis; F:electron carrier activity; F:protein disulfide oxidoreductase activity; P:electron transport chain
ESTAGB1WB001948	C:cell part
ESTAGB1WB001958	F:binding; C:mitochondrial inner membrane; P:phosphate transport; C:lipid particle; F:phosphate transmembrane transporter activity; P:wing disc dorsal/ventral pattern formation; C:integral to membrane
ESTAGB1WB001959	F:binding; P:monosaccharide metabolic process; F:oxidoreductase activity; P:oxidation reduction; C:cell part
ESTAGB1WB001965	F:general RNA polymerase II transcription factor activity; C:nucleus
ESTAGB1WB001967	F:structural constituent of cuticle
ESTAGB1WB001971	C:cytoplasm; F:NAD or NADH binding; P:oxidation reduction; P:glycolysis; F:glyceraldehyde-3-phosphate dehydrogenase (phosphorylating) activity; P:gluconeogenesis
ESTAGB1WB001972	F:translation elongation factor activity; C:mitochondrial inner membrane; C:mitochondrial nucleoid; F:transferase activity; F:protein binding; P:microtubule-based process; F:nucleotide binding; C:ribosome; P:regulation of translational elongation
ESTAGB1WB001982	F:metal ion binding; F:zinc ion binding; F:protein binding; C:intracellular
ESTAGB1WB001987	C:gap junction
ESTAGB1WB001989	C:membrane
ESTAGB1WB001990	F:oxidoreductase activity; P:lipid biosynthetic process
ESTAGB1WB001991	P:regulation of cell shape; P:establishment or maintenance of cell polarity; P:compound eye retinal cell programmed cell death; C:catenin complex; P:Wnt receptor signaling pathway; P:heart development; P:oocyte localization during germarium-derived egg chamber formation; F:cadherin binding; P:germ-line stem cell division; P:cytoskeletal anchoring at plasma membrane; P:branch fusion, open tracheal…
ESTAGB1WB001993	P:very-long-chain fatty acid metabolic process; C:integral to membrane
ESTAGB1WB001994	F:binding; F:lysophospholipase activity; F:hydrolase activity; F:sugar binding
ESTAGB1WB001997	F:hydrolase activity, hydrolyzing O-glycosyl compounds; P:carbohydrate metabolic process; P:metabolic process; F:hydrolase activity; F:catalytic activity; F:hydrolase activity, acting on glycosyl bonds; F:cation binding
ESTAGB1WB002000	C:integral to membrane
ESTAGB1WB002001	F:metal ion binding; C:membrane part; P:electron transport chain
ESTAGB1WB002003	F:binding; P:metabolic process; F:catalytic activity
ESTAGB1WB002005	F:structural constituent of ribosome; C:cytosolic large ribosomal subunit; P:translational elongation; P:ribosome biogenesis
ESTAGB1WB002014	F:transcription coactivator activity; C:nucleus
ESTAGB1WB002017	C:mitochondrial respiratory chain complex IV; F:cytochrome-c oxidase activity; P:mitochondrial electron transport, cytochrome c to oxygen; P:proton transport
ESTAGB1WB002018	F:GTP binding; F:translation release factor activity; C:cytosol; F:GTPase activity; C:ribosome; ; P:regulation of translational termination; C:translation release factor complex
ESTAGB1WB002024	F:hydrolase activity
ESTAGB1WB002030	C:microtubule associated complex; F:acyltransferase activity; F:protein binding; P:acyl-carrier-protein biosynthetic process
ESTAGB1WB002032	F:calcium ion binding
ESTAGB1WB002041	F:lipoic acid binding; C:glycine cleavage complex; C:mitochondrion; P:glycine decarboxylation via glycine cleavage system
ESTAGB1WB002050	P:proton-transporting ATP synthase complex assembly; F:protein binding
ESTAGB1WB002054	P:cellular alcohol metabolic process; F:oxidoreductase activity, acting on CH-OH group of donors; F:FAD binding
ESTAGB1WB002060	P:protein folding; F:unfolded protein binding; F:ATP binding; P:response to stress
ESTAGB1WB002061	P:carbohydrate metabolic process; F:catalytic activity; F:cation binding
ESTAGB1WB002062	F:glutaryl-CoA dehydrogenase activity; C:mitochondrial inner membrane; P:acyl-CoA biosynthetic process; F:protein binding; P:fatty acid oxidation; F:FAD binding; P:electron transport chain; P:lysine catabolic process; P:tryptophan metabolic process; P:benzoate metabolic process
ESTAGB1WB002063	F:molecular_function; F:hydrolase activity; F:catalytic activity; P:biological_process; C:cellular_component
ESTAGB1WB002064	F:ATP binding; F:ATPase activity; F:nucleotide binding; F:nucleoside-triphosphatase activity
ESTAGB1WB002065	C:membrane; F:metal ion binding; F:holocytochrome-c synthase activity; C:mitochondrion; P:chlorophyll metabolic process
ESTAGB1WB002074	F:GTPase activator activity; C:membrane
ESTAGB1WB002078	F:sugar binding
ESTAGB1WB002082	C:membrane; F:ion channel activity; P:ion transport
ESTAGB1WB002087	F:zinc ion binding; F:ubiquitin-protein ligase activity; F:protein binding
ESTAGB1WB002088	P:pole cell formation; P:RNA interference, siRNA loading onto RISC; F:protein binding; C:RNA-induced silencing complex; P:dsRNA transport; P:germ-line stem cell division; C:cytoplasm; F:nucleic acid binding; P:segment polarity determination; P:mitotic cell cycle, embryonic; F:bidentate ribonuclease III activity; P:pre-microRNA processing; C:nucleus; P:RNA interference, production of siRNA; P:regu…
ESTAGB1WB002098	F:metal ion binding; F:zinc ion binding; F:protein binding; C:intracellular
ESTAGB1WB002099	F:signal transducer activity; P:signal transduction; F:transcription factor activity; P:regulation of transcription, DNA-dependent; C:transcription factor complex
ESTAGB1WB002101	F:uridine kinase activity; F:ATP binding; F:phosphotransferase activity, alcohol group as acceptor; P:pyrimidine base metabolic process
ESTAGB1WB002102	F:integrase activity; P:DNA integration; C:membrane; F:transporter activity; P:transport
ESTAGB1WB002105	F:hydrolase activity
ESTAGB1WB002110	F:transferase activity
ESTAGB1WB002117	C:integral to membrane; F:cationic amino acid transmembrane transporter activity; P:amino acid transport; P:growth; F:amino acid transmembrane transporter activity; P:lipid metabolic process; P:cation transport; P:polyamine transport
ESTAGB1WB002120	F:binding; F:kinase activity
ESTAGB1WB002127	F:RNA binding; P:RNA modification; P:pseudouridine synthesis; F:pseudouridine synthase activity
ESTAGB1WB002129	F:RNA binding; F:binding
ESTAGB1WB002131	C:microfibril
ESTAGB1WB002132	P:regulation of transcription; C:nucleus
ESTAGB1WB002135	P:regulation of endocytosis; C:clathrin coat of endocytic vesicle
ESTAGB1WB002136	C:cytoplasm; P:protein localization; F:protein kinase A binding; P:compound eye cone cell differentiation; C:integral to membrane
ESTAGB1WB002139	P:regulation of transcription, DNA-dependent; P:organ morphogenesis; P:myeloid cell differentiation; F:protein binding; P:signal transduction; C:nucleus
ESTAGB1WB002144	C:mitochondrial large ribosomal subunit; F:structural constituent of ribosome; F:RNA binding; P:translation; P:ribosome biogenesis
ESTAGB1WB002153	P:nuclear export; C:Cajal body; F:GTP binding; C:endoplasmic reticulum
ESTAGB1WB002159	F:catalytic activity
ESTAGB1WB002160	P:cell redox homeostasis; C:endoplasmic reticulum; F:isomerase activity; C:lipid particle
ESTAGB1WB002161	P:apoptosis; F:protein serine/threonine kinase activity; F:calcium ion binding; F:ATP binding; P:positive regulation of JNK cascade; P:protein amino acid phosphorylation; P:serine family amino acid metabolic process
ESTAGB1WB002166	F:binding
ESTAGB1WB002169	F:beta-ureidopropionase activity; P:pyrimidine base metabolic process; P:pantothenate biosynthetic process; P:beta-alanine metabolic process
ESTAGB1WB002172	P:lipid metabolic process
ESTAGB1WB002174	P:translation
ESTAGB1WB002179	F:nucleotide binding
ESTAGB1WB002182	C:integral to membrane
ESTAGB1WB002185	F:gamma-glutamyltransferase activity
ESTAGB1WB002191	P:transcription
ESTAGB1WB002193	C:nucleus
ESTAGB1WB002196	P:nucleotide catabolic process; F:metal ion binding; F:hydrolase activity, acting on ester bonds; F:nucleotide binding; F:hydrolase activity
ESTAGB1WB002197	C:cytoplasm; P:fibroblast growth factor receptor signaling pathway; P:Ras protein signal transduction
ESTAGB1WB002198	P:regulation of transcription
ESTAGB1WB002199	C:cytoplasm; C:microsome; F:binding; F:carbonyl reductase (NADPH) activity; P:leukotriene metabolic process; P:prostaglandin metabolic process
ESTAGB1WB002200	P:negative regulation of transforming growth factor beta receptor signaling pathway; P:olfactory learning; P:germarium-derived female germ-line cyst encapsulation; P:regulation of proteolysis; P:oocyte localization during germarium-derived egg chamber formation; P:negative regulation of nurse cell apoptosis; F:phosphoprotein binding; P:dorsal appendage formation; P:ovarian follicle cell stalk for…
ESTAGB1WB002208	C:FHF complex; P:apoptosis; P:endosome to lysosome transport; P:regulation of protein metabolic process; P:post-translational protein modification; P:early endosome to late endosome transport; P:endosome organization; F:small conjugating protein ligase activity; P:protein transport; P:lysosome organization; C:plasma membrane
ESTAGB1WB002217	P:regulation of transcription; F:zinc ion binding; F:transcription regulator activity; C:nucleus
ESTAGB1WB002219	F:motor activity
ESTAGB1WB002239	F:oxidoreductase activity
ESTAGB1WB002252	C:ribosome; F:structural constituent of ribosome; P:translation; P:ribosome biogenesis
ESTAGB1WB002270	P:gene silencing by miRNA
ESTAGB1WB002274	P:positive regulation of growth rate; C:nucleosome; P:embryonic development ending in birth or egg hatching; P:regulation of cell shape; F:DNA binding; P:body morphogenesis; P:cell adhesion; P:nematode larval development; P:nucleosome assembly; C:Barr body
ESTAGB1WB002277	C:nucleosome; F:DNA binding; P:nucleosome assembly; C:nucleus
ESTAGB1WB002278	F:translation elongation factor activity; C:eukaryotic translation elongation factor 1 complex; C:ribosome; P:regulation of translational elongation
ESTAGB1WB002279	C:intracellular organelle
ESTAGB1WB002282	C:cytoskeleton; C:cytoplasm; F:ATP binding; F:protein binding
ESTAGB1WB002283	F:nucleic acid binding; F:protein binding; C:nucleus; P:nuclear mRNA splicing, via spliceosome; F:nucleotide binding
ESTAGB1WB002304	P:anti-apoptosis; P:negative regulation of apoptosis; C:oligosaccharyltransferase complex; F:transferase activity; C:plasma membrane
ESTAGB1WB002310	F:hydrolase activity
ESTAGB1WB002311	C:cellular_component
ESTAGB1WB002315	C:intracellular part
ESTAGB1WB002320	P:protein heterooligomerization; P:cellularization; C:synaptosome; F:GTP binding; F:actin binding; F:microtubule binding; P:mitosis; F:ubiquitin protein ligase binding; P:vesicle docking during exocytosis; C:intercellular bridge; P:vesicle targeting; C:septin complex; C:nucleus; P:positive regulation of apoptosis; P:cytokinesis; C:tubulin complex
ESTAGB1WB002329	C:cytoplasm; P:nematode larval development; F:endopeptidase activity; C:proteasome regulatory particle, base subcomplex; F:ATPase activity; F:ATP binding; P:reproduction; P:embryonic development ending in birth or egg hatching; P:cellular process; P:proteolysis; C:nucleus
ESTAGB1WB002330	P:histone H4 acetylation; P:positive regulation of transcription; F:protein binding; C:histone acetyltransferase complex; P:negative regulation of growth; P:negative regulation of cell proliferation; F:metal ion binding; P:histone H3 acetylation; P:DNA replication
ESTAGB1WB002334	P:mitotic spindle elongation; F:structural constituent of ribosome; C:lipid particle; P:multicellular organismal development; C:cytosolic small ribosomal subunit; C:nucleus; P:translation; P:ribosome biogenesis
ESTAGB1WB002335	C:cytoplasm; P:modification-dependent protein catabolic process; P:autophagy; P:protein transport
ESTAGB1WB002338	C:phosphopyruvate hydratase complex; C:lipid particle; F:phosphopyruvate hydratase activity; F:magnesium ion binding; P:glycolysis; P:tryptophan biosynthetic process; P:gluconeogenesis; P:tyrosine biosynthetic process; P:L-phenylalanine biosynthetic process
ESTAGB1WB002339	P:epithelial cell migration, open tracheal system; P:nucleoside diphosphate phosphorylation; P:peptidyl-serine phosphorylation; F:nucleoside diphosphate kinase activity; F:microtubule binding; C:nuclear microtubule; P:UTP biosynthetic process; F:ATP binding; P:microtubule-based process; F:magnesium ion binding; P:mitosis; P:GTP biosynthetic process; P:protein amino acid autophosphorylation; P:CTP…
ESTAGB1WB002340	P:proteolysis; P:regulation of catalytic activity; F:cysteine-type endopeptidase activity
ESTAGB1WB002341	P:metabolic process; F:catalytic activity
ESTAGB1WB002343	C:intracellular
ESTAGB1WB002344	P:mitotic spindle elongation; F:translation initiation factor activity; C:eukaryotic translation initiation factor 4F complex; P:dorsal/ventral axis specification; C:cytosol; F:mRNA binding; P:imaginal disc growth; P:regulation of alternative nuclear mRNA splicing, via spliceosome; P:DNA unwinding during replication; P:instar larval development; F:RNA cap binding; F:ATP binding; F:single-stranded…
ESTAGB1WB002347	F:xenobiotic-transporting ATPase activity; F:nucleotide binding; P:multidrug transport
ESTAGB1WB002349	P:cytoskeleton organization; F:protein binding; C:actin filament; P:heart development; P:positive regulation of NFAT protein import into nucleus; F:glucuronosyltransferase activity; P:maintenance of protein location in cell; P:phagocytosis, engulfment; P:sperm individualization; P:heparan sulfate proteoglycan biosynthetic process; C:Ino80 complex; C:lipid particle; P:chondroitin sulfate biosynthe…
ESTAGB1WB002350	F:translation elongation factor activity; F:GTP binding; C:eukaryotic translation elongation factor 1 complex; C:lipid particle; F:GTPase activity; C:ribosome; P:regulation of translational elongation
ESTAGB1WB002354	P:protein folding
ESTAGB1WB002357	F:binding; C:mitochondrial inner membrane; P:response to mechanical stimulus; P:ADP transport; C:lipid particle; F:ATP:ADP antiporter activity; C:integral to membrane; P:ATP transport
ESTAGB1WB002360	F:ATP binding; P:response to stress; C:nucleus
ESTAGB1WB002362	C:cell part
ESTAGB1WB002363	C:cytoplasm; F:hydrolase activity; P:regulation of translational termination; C:nucleus
ESTAGB1WB002372	P:axon ensheathment; P:central complex development; P:axon extension; C:lateral plasma membrane; P:regulation of tube size, open tracheal system; P:establishment of endothelial blood-brain barrier; F:calcium ion binding; P:mushroom body development; P:septate junction assembly; P:synapse organization; P:nerve maturation; P:neuron adhesion; C:pleated septate junction; P:imaginal disc morphogenesis…
ESTAGB1WB002376	F:damaged DNA binding; F:nucleotide binding; P:nucleotide-excision repair; C:nucleus
ESTAGB1WB002386	P:viral genome replication; P:regulation of transcription from RNA polymerase II promoter; F:nucleic acid binding; C:nucleolus; F:protein binding; F:transcription elongation regulator activity; F:RNA polymerase II transcription factor activity; C:transcription factor complex
ESTAGB1WB002387	C:cytoplasm; P:deoxyribonucleotide catabolic process; F:deoxyribose-phosphate aldolase activity; P:pentose-phosphate shunt
ESTAGB1WB002395	F:structural constituent of cuticle
ESTAGB1WB002398	F:ATP binding; P:response to stress
ESTAGB1WB002399	F:structural constituent of cuticle
ESTAGB1WB002402	C:cytoskeleton; C:cytoplasm; F:ATP binding; F:protein binding
ESTAGB1WB002403	F:structural constituent of cuticle
ESTAGB1WB002417	F:structural constituent of cuticle
ESTAGB1WB002419	C:endosome; F:protein binding; P:transport; P:cellular process; C:membrane
ESTAGB1WB002428	F:structural constituent of cuticle
ESTAGB1WB002435	P:proteasomal ubiquitin-dependent protein catabolic process; C:cytosol; C:proteasome regulatory particle, base subcomplex; F:endopeptidase activity; F:thyrotropin-releasing hormone receptor binding; F:ATP binding; F:ATPase activity; F:transcription factor binding; P:signal transduction; C:transcription factor complex
ESTAGB1WB002442	F:structural constituent of ribosome; C:lipid particle; F:RNA binding; C:cytosolic small ribosomal subunit; P:translation; P:ribosome biogenesis
ESTAGB1WB002444	F:molecular_function; C:signalosome; C:cytoplasm; P:biological_process; C:nucleus; C:cellular_component
ESTAGB1WB002445	F:nucleic acid binding; F:ATP binding; F:ATP-dependent helicase activity
ESTAGB1WB002446	F:helicase activity; F:nucleotide binding
ESTAGB1WB002454	P:mitotic spindle elongation; F:structural constituent of ribosome; C:cytosolic large ribosomal subunit; P:translation; P:ribosome biogenesis
ESTAGB1WB002455	C:polytene chromosome puff; F:RNA binding; P:regulation of alternative nuclear mRNA splicing, via spliceosome; C:chromatin; C:ribonucleoprotein complex; C:omega speckle
ESTAGB1WB002457	C:integral to membrane
ESTAGB1WB002463	C:ribosome; F:structural constituent of ribosome; P:translation; P:ribosome biogenesis
ESTAGB1WB002472	P:modification-dependent protein catabolic process; C:cellular_component
ESTAGB1WB002473	F:structural constituent of cuticle
ESTAGB1WB002476	P:regulation of tube length, open tracheal system; F:chitin binding; C:extracellular region; F:chitin deacetylase activity; P:chitin metabolic process
ESTAGB1WB002478	C:nuclear envelope; C:integral to membrane
ESTAGB1WB002481	P:response to heat
ESTAGB1WB002483	P:mitochondrial electron transport, cytochrome c to oxygen; C:lipid particle; C:mitochondrial respiratory chain complex IV; F:cytochrome-c oxidase activity; P:proton transport
ESTAGB1WB002485	F:NAD or NADH binding; C:lipid particle; C:mitochondrial matrix; P:oxidation reduction; F:magnesium ion binding; P:tricarboxylic acid cycle; F:isocitrate dehydrogenase (NAD+) activity
ESTAGB1WB002486	F:NAD or NADH binding; P:oxidation reduction; F:magnesium ion binding; P:tricarboxylic acid cycle; F:isocitrate dehydrogenase (NAD+) activity; C:mitochondrion
ESTAGB1WB002487	F:structural constituent of ribosome; C:lipid particle; C:cytosolic small ribosomal subunit; P:translation; P:ribosome biogenesis
ESTAGB1WB002492	P:mitotic spindle elongation; C:cytoplasm; F:RNA binding
ESTAGB1WB002496	F:binding; P:metabolic process; F:catalytic activity
ESTAGB1WB002498	C:eukaryotic translation initiation factor 3 complex; F:translation initiation factor activity; P:camera-type eye development; P:embryonic viscerocranium morphogenesis; C:ribosome; P:regulation of translational initiation
ESTAGB1WB002499	C:extracellular region; F:bacterial binding; P:regulation of innate immune response
ESTAGB1WB002511	F:ATP binding; P:response to stress; F:nucleotide binding
ESTAGB1WB002530	F:isocitrate dehydrogenase (NADP+) activity; P:oxidation reduction; P:isocitrate metabolic process; F:NAD or NADH binding; F:magnesium ion binding; P:glutathione metabolic process; P:reductive tricarboxylic acid cycle
ESTAGB1WB002532	P:mitotic spindle elongation; C:eukaryotic 43S preinitiation complex; P:smoothened signaling pathway; F:RNA binding; F:translation initiation factor activity; C:cytosol; P:phagocytosis, engulfment; C:ribosome; P:regulation of translational initiation
ESTAGB1WB002540	F:endopeptidase activity; C:proteasome regulatory particle; F:ATP binding; F:nucleoside-triphosphatase activity; P:proteolysis; C:nucleus; C:cytosol
ESTAGB1WB002548	C:extracellular region; P:neuropeptide signaling pathway; F:ecdysis-triggering hormone activity; P:eclosion; F:eclosion hormone activity; P:adult behavior; P:ecdysis, chitin-based cuticle
ESTAGB1WB002560	P:hemopoiesis; P:protein export from nucleus; C:mitochondrial nucleoid; C:cell surface; F:enzyme binding; P:anti-apoptosis; F:oxidoreductase activity; F:ATP binding; F:ATPase activity; P:metabolic process; F:unfolded protein binding
ESTAGB1WB002563	F:zinc ion binding; C:intracellular; F:protein binding
ESTAGB1WB002564	F:zinc ion binding; C:intracellular; F:protein binding
ESTAGB1WB002579	P:mitotic spindle elongation; F:structural constituent of ribosome; F:protein binding; C:cytosolic large ribosomal subunit; P:translation; P:ribosome biogenesis
ESTAGB1WB002583	P:DNA recombination; P:DNA repair; P:cell growth; F:zinc ion binding; F:nucleic acid binding; F:5'-3' exoribonuclease activity; C:nucleolus; P:regulation of transcription; P:spermatogenesis; F:protein binding; P:microtubule-based process; P:transcription termination; P:mRNA processing; P:regulation of RNA metabolic process
ESTAGB1WB002596	P:ubiquinone biosynthetic process; F:methyltransferase activity
ESTAGB1WB002601	F:nucleic acid binding; P:imaginal disc-derived wing morphogenesis; F:zinc ion binding; C:intracellular; C:nucleus
ESTAGB1WB002610	P:cellular alcohol metabolic process; F:oxidoreductase activity, acting on CH-OH group of donors; F:FAD binding
ESTAGB1WB002623	F:zinc ion binding; F:calcium ion binding; F:metalloendopeptidase activity; P:proteolysis; C:proteinaceous extracellular matrix
ESTAGB1WB002624	F:nucleic acid binding; F:ATP binding; F:ATP-dependent helicase activity
ESTAGB1WB002634	C:protein complex; P:regulation of JAK-STAT cascade; F:protein kinase binding; P:transcription; C:nucleus
ESTAGB1WB002636	P:cholesterol homeostasis; P:protein amino acid phosphorylation; P:positive regulation of cell cycle; F:AMP-activated protein kinase activity; P:serine family amino acid metabolic process
ESTAGB1WB002653	P:transport; F:ADP-ribosylation factor binding; P:cellular process; C:membrane; C:trans-Golgi network
ESTAGB1WB002655	P:cellular process
ESTAGB1WB002664	C:membrane
ESTAGB1WB002669	P:DNA repair; F:lyase activity; F:endonuclease activity; F:metal ion binding; P:cell redox homeostasis; F:protein complex binding; C:centrosome; F:DNA binding; F:oxidoreductase activity; F:3'-5' exonuclease activity; F:phosphoric diester hydrolase activity; P:regulation of DNA binding; C:perinuclear region of cytoplasm; F:transcription coactivator activity; C:transcription factor complex; P:posit…
ESTAGB1WB002678	C:holo TFIIH complex; F:general RNA polymerase II transcription factor activity; P:regulation of transcription from RNA polymerase II promoter
ESTAGB1WB002683	F:binding
ESTAGB1WB002686	P:chromatin modification; F:zinc ion binding; P:regulation of transcription; F:histone-lysine N-methyltransferase activity; F:DNA binding; C:nucleus; P:protein amino acid methylation; P:lysine catabolic process
ESTAGB1WB002693	F:sequence-specific DNA binding; F:transcription factor activity; F:zinc ion binding; P:regulation of transcription, DNA-dependent; C:transcription factor complex
ESTAGB1WB002694	F:specific transcriptional repressor activity; P:positive regulation of transcription; F:histone binding; C:Cajal body; P:myoblast differentiation; C:nucleolus; F:transcription coactivator activity; P:DNA damage checkpoint; P:regulation of transcription of G1/S-phase of mitotic cell cycle; F:transcription factor activity; P:establishment of protein localization; P:negative regulation of transcrip…
ESTAGB1WB002698	F:kinase activity; C:membrane; C:membrane fraction; C:perinuclear region of cytoplasm; C:Golgi apparatus; F:zinc ion binding; F:protein binding; P:transport
ESTAGB1WB002699	F:sequence-specific DNA binding; F:transcription factor activity; P:regulation of transcription, DNA-dependent; C:transcription factor complex
ESTAGB1WB002702	C:polytene chromosome puff; F:nucleic acid binding; C:polytene chromosome interband; P:fertilization, exchange of chromosomal proteins; P:imaginal disc-derived wing morphogenesis; F:helicase activity; P:oogenesis
ESTAGB1WB002712	C:cytoplasm; P:negative regulation of signal transduction
ESTAGB1WB002718	P:axon midline choice point recognition; P:negative regulation of microtubule depolymerization; F:phosphatidylinositol-4,5-bisphosphate binding; P:spectrosome organization; P:plasma membrane organization; C:spectrosome; F:actin binding; F:microtubule binding; C:lateral plasma membrane; C:axon; P:fusome organization; P:long-term strengthening of neuromuscular junction; C:apicolateral plasma membra…
ESTAGB1WB002719	F:monooxygenase activity; F:iron ion binding; C:cell part; P:metabolic process
ESTAGB1WB002729	F:transcription coactivator activity; P:regulation of transcription from RNA polymerase II promoter; F:RNA polymerase II transcription factor activity; P:transcription initiation from RNA polymerase II promoter; C:transcription factor complex; P:positive regulation of transcription
ESTAGB1WB002730	F:substrate-specific transmembrane transporter activity; C:integral to membrane; P:transmembrane transport
ESTAGB1WB002744	C:cytoplasm; P:regulation of phosphorylation; F:protein binding
ESTAGB1WB002758	C:cell part
ESTAGB1WB002765	F:binding; P:phosphate transport; C:mitochondrial envelope; F:phosphate transmembrane transporter activity; C:integral to membrane
ESTAGB1WB002766	P:oxidation reduction; F:oxidoreductase activity; F:binding
ESTAGB1WB002767	P:oxidation reduction; F:oxidoreductase activity; F:binding
ESTAGB1WB002773	P:protein folding; F:peptide binding; C:cytoplasm; F:peptidyl-prolyl cis-trans isomerase activity
ESTAGB1WB002776	F:general RNA polymerase II transcription factor activity; C:transcription factor complex; P:regulation of transcription from RNA polymerase II promoter
ESTAGB1WB002779	F:structural constituent of cuticle
ESTAGB1WB002781	F:structural constituent of cuticle
ESTAGB1WB002785	F:zinc ion binding; C:intracellular
ESTAGB1WB002801	P:hydrogen peroxide catabolic process; P:cell redox homeostasis; F:glutathione peroxidase activity; F:thioredoxin peroxidase activity; C:cytosol; P:glutathione metabolic process; P:peroxidase reaction
ESTAGB1WB002804	F:zinc ion binding; C:intracellular
ESTAGB1WB002815	C:mitochondrial inner membrane
ESTAGB1WB002816	C:mitochondrial inner membrane
ESTAGB1WB002817	P:fatty acid biosynthetic process; P:pheromone biosynthetic process; F:stearoyl-CoA 9-desaturase activity; C:lipid particle; F:iron ion binding; P:oxidation reduction; C:integral to membrane; P:cuticle hydrocarbon biosynthetic process
ESTAGB1WB002818	P:fatty acid biosynthetic process; P:pheromone biosynthetic process; F:stearoyl-CoA 9-desaturase activity; C:lipid particle; F:iron ion binding; P:oxidation reduction; C:integral to membrane; P:cuticle hydrocarbon biosynthetic process
ESTAGB1WB002819	P:regulation of cell shape; P:establishment or maintenance of cell polarity; P:compound eye retinal cell programmed cell death; C:catenin complex; P:Wnt receptor signaling pathway; P:heart development; P:oocyte localization during germarium-derived egg chamber formation; F:cadherin binding; P:germ-line stem cell division; P:cytoskeletal anchoring at plasma membrane; P:branch fusion, open tracheal…
ESTAGB1WB002822	P:very-long-chain fatty acid metabolic process; P:fatty acid biosynthetic process; C:integral to membrane
ESTAGB1WB002823	C:integral to membrane
ESTAGB1WB002825	F:lysophospholipase activity; F:hydrolase activity; F:sugar binding
ESTAGB1WB002834	C:integral to membrane
ESTAGB1WB002835	C:integral to membrane
ESTAGB1WB002855	P:carbohydrate metabolic process; F:catalytic activity; F:cation binding
ESTAGB1WB002856	P:carbohydrate metabolic process; F:catalytic activity; F:cation binding
ESTAGB1WB002871	F:binding; F:aminoacylase activity; C:cytosol; P:primary metabolic process; P:urea cycle intermediate metabolic process
ESTAGB1WB002891	F:RNA binding; F:exonuclease activity; C:nuclear exosome (RNase complex)
ESTAGB1WB002893	P:apoptosis; F:protein kinase activity; F:calcium ion binding; P:positive regulation of JNK cascade
ESTAGB1WB002897	P:pyrimidine base catabolic process; F:beta-ureidopropionase activity; P:pantothenate biosynthetic process; P:beta-alanine metabolic process
ESTAGB1WB002898	C:cytoplasm; F:beta-ureidopropionase activity; F:zinc ion binding; P:pyrimidine base metabolic process; P:pantothenate biosynthetic process; P:beta-alanine metabolic process
ESTAGB1WB002899	P:positive regulation of signal transduction; P:translation; F:nucleic acid binding; P:SREBP-mediated signaling pathway; C:cytoplasm; P:protein amino acid phosphorylation
ESTAGB1WB002902	C:cytoplasm; P:signal transduction; F:GTP binding
ESTAGB1WB002903	C:intracellular; F:GTP binding
ESTAGB1WB002904	C:intracellular; F:GTP binding
ESTAGB1WB002906	F:metal ion binding
ESTAGB1WB002911	F:gamma-glutamyltransferase activity
ESTAGB1WB002914	P:response to copper ion
ESTAGB1WB002915	P:regulation of transcription; F:protein binding
ESTAGB1WB002925	F:motor activity
ESTAGB1WB002932	P:synaptic vesicle coating; C:synaptic vesicle; C:membrane coat; P:dsRNA transport
ESTAGB1WB002941	P:positive regulation of growth rate; C:nucleosome; P:embryonic development ending in birth or egg hatching; P:regulation of cell shape; F:DNA binding; P:body morphogenesis; P:cell adhesion; P:nematode larval development; P:nucleosome assembly; C:Barr body
ESTAGB1WB002943	C:nucleosome; F:DNA binding; P:nucleosome assembly; C:Barr body
ESTAGB1WB002946	C:cytoplasm; C:cytoskeleton; C:lamellipodium; F:actin binding; C:focal adhesion; P:cell adhesion; C:nucleus
ESTAGB1WB002950	P:translational elongation; F:translation elongation factor activity; P:translation; C:eukaryotic translation elongation factor 1 complex
ESTAGB1WB002951	P:translation
ESTAGB1WB002953	F:translation elongation factor activity; C:eukaryotic translation elongation factor 1 complex; C:ribosome; P:regulation of translational elongation
ESTAGB1WB002955	C:intracellular organelle
ESTAGB1WB002962	C:cytoskeleton; C:cytoplasm; F:ATP binding; F:protein binding
ESTAGB1WB002971	F:oxidoreductase activity; F:iron ion binding; P:oxidation reduction; C:membrane part; C:mitochondrion; P:generation of precursor metabolites and energy
ESTAGB1WB002990	F:hydrolase activity, hydrolyzing O-glycosyl compounds; P:carbohydrate metabolic process
ESTAGB1WB002991	P:carbohydrate metabolic process; F:hydrolase activity, hydrolyzing O-glycosyl compounds
ESTAGB1WB003018	F:zinc ion binding; F:protein binding
ESTAGB1WB003019	F:zinc ion binding; C:histone acetyltransferase complex; P:negative regulation of growth; P:negative regulation of transcription, DNA-dependent; P:negative regulation of cell proliferation; P:cell cycle arrest; P:DNA damage response, signal transduction by p53 class mediator resulting in transcription of p21 class mediator; F:transcription coactivator activity; P:histone H4-K12 acetylation; P:his…
ESTAGB1WB003020	P:DNA replication; F:metal ion binding; P:positive regulation of apoptosis
ESTAGB1WB003021	F:protein binding; F:metal ion binding
ESTAGB1WB003022	P:negative regulation of growth; P:DNA replication; P:negative regulation of cell proliferation; P:histone H3 acetylation; F:protein binding; C:histone acetyltransferase complex; P:positive regulation of transcription
ESTAGB1WB003030	P:transport; P:cellular catabolic process
ESTAGB1WB003031	C:cytoplasm; P:modification-dependent protein catabolic process; P:autophagy; P:protein transport
ESTAGB1WB003036	C:M band; P:negative regulation of cell growth; C:phosphopyruvate hydratase complex; P:negative regulation of transcription from RNA polymerase II promoter; F:transcription corepressor activity; F:transcription factor activity; F:magnesium ion binding; P:glycolysis; F:serine-type endopeptidase activity; F:phosphopyruvate hydratase activity; C:plasma membrane; C:transcription factor complex; P:try…
ESTAGB1WB003038	P:epithelial cell migration, open tracheal system; P:nucleoside diphosphate phosphorylation; P:peptidyl-serine phosphorylation; F:nucleoside diphosphate kinase activity; F:microtubule binding; C:nuclear microtubule; P:UTP biosynthetic process; F:ATP binding; P:microtubule-based process; F:magnesium ion binding; P:mitosis; P:GTP biosynthetic process; P:protein amino acid autophosphorylation; P:CTP…
ESTAGB1WB003040	P:proteolysis; P:regulation of catalytic activity; F:cysteine-type endopeptidase activity
ESTAGB1WB003041	P:proteolysis; P:regulation of catalytic activity; F:cysteine-type endopeptidase activity
ESTAGB1WB003043	P:proteolysis; P:regulation of catalytic activity; F:cysteine-type endopeptidase activity
ESTAGB1WB003044	P:carbohydrate metabolic process; F:hydrolase activity, hydrolyzing O-glycosyl compounds; F:cation binding
ESTAGB1WB003045	P:carbohydrate metabolic process; F:hydrolase activity, hydrolyzing O-glycosyl compounds; F:cation binding
ESTAGB1WB003049	F:ATP binding; F:ATP-dependent helicase activity; F:translation initiation factor activity; C:ribosome; P:regulation of translational initiation
ESTAGB1WB003051	F:ATP-dependent helicase activity; F:actin binding; P:cytoskeleton organization; F:ATP binding; F:translation initiation factor activity; C:actin cytoskeleton; C:ribosome; P:regulation of translational initiation
ESTAGB1WB003052	F:nucleic acid binding; F:ATP binding; F:ATP-dependent helicase activity
ESTAGB1WB003054	P:mitotic spindle elongation; F:translation initiation factor activity; C:eukaryotic translation initiation factor 4F complex; P:dorsal/ventral axis specification; C:cytosol; F:mRNA binding; P:imaginal disc growth; P:regulation of alternative nuclear mRNA splicing, via spliceosome; P:DNA unwinding during replication; P:instar larval development; F:RNA cap binding; F:ATP binding; F:single-stranded…
ESTAGB1WB003062	P:protein amino acid phosphorylation; F:ATPase activity, coupled to transmembrane movement of substances; F:protein kinase activity; P:transport; F:ATP binding; C:integral to membrane
ESTAGB1WB003064	F:ATPase activity, coupled to transmembrane movement of substances; P:transport; F:ATP binding; C:integral to membrane; C:ATP-binding cassette (ABC) transporter complex
ESTAGB1WB003065	F:ATPase activity, coupled to transmembrane movement of substances; P:transport; F:ATP binding; C:integral to membrane
ESTAGB1WB003066	F:ATPase activity, coupled to transmembrane movement of substances; P:transport; F:ATP binding; C:integral to membrane
ESTAGB1WB003069	C:cytoskeleton; C:cytoplasm; F:ATP binding; F:protein binding
ESTAGB1WB003070	C:Ino80 complex; P:maintenance of protein location in cell; P:sperm individualization; P:cytokinesis; P:cytoskeleton organization; P:phagocytosis, engulfment; F:ATP binding; F:protein binding; C:actin filament; C:lipid particle
ESTAGB1WB003073	F:glucuronosyltransferase activity; P:positive regulation of NFAT protein import into nucleus; P:cytokinesis; P:cytoskeleton organization; P:heart development; P:heparan sulfate proteoglycan biosynthetic process; F:ATP binding; F:protein binding; F:structural constituent of cytoskeleton; C:actin filament; C:lipid particle; P:chondroitin sulfate biosynthetic process
ESTAGB1WB003074	C:cytoskeleton; C:cytoplasm; F:ATP binding; F:protein binding
ESTAGB1WB003098	C:membrane; P:amino acid transport; P:growth; F:amino acid transmembrane transporter activity
ESTAGB1WB003111	C:mitochondrial inner membrane; C:integral to membrane; F:binding; P:transport; F:transporter activity
ESTAGB1WB003128	P:sleep; F:ATPase activity; C:lipid particle; P:RNA interference; F:ATP binding; C:endoplasmic reticulum; P:response to heat
ESTAGB1WB003249	F:oxidoreductase activity; C:respiratory chain; F:electron carrier activity; F:iron ion binding; P:transport; C:integral to membrane; P:respiratory electron transport chain; C:mitochondrion; P:electron transport chain
ESTAGB1WB003328	P:mitochondrion organization; C:mitochondrion
ESTAGB1WB003334	F:chromatin binding; C:chromatin; P:chromatin assembly or disassembly; C:nucleus
ESTAGB1WB003336	C:mitochondrion
ESTAGB1WB003337	F:dopachrome isomerase activity; F:cytokine activity; C:extracellular space; C:extracellular region; F:isomerase activity
ESTAGB1WB003342	P:nematode larval development; F:ATP-dependent helicase activity; F:nucleic acid binding; P:positive regulation of growth rate; F:ATP binding; P:embryonic development ending in birth or egg hatching
ESTAGB1WB003345	C:mitochondrial respiratory chain complex III; C:lipid particle; F:iron ion binding; P:mitochondrial electron transport, ubiquinol to cytochrome c; F:electron transporter, transferring electrons within CoQH2-cytochrome c reductase complex activity; P:electron transport chain
ESTAGB1WB003347	P:response to hypoxia; P:female meiosis chromosome segregation; P:mesoderm development; P:distributive segregation; F:protein serine/threonine kinase activity; P:mitotic centrosome separation; P:meiotic metaphase I plate congression; P:mitotic cell cycle spindle assembly checkpoint; F:ATP binding; P:achiasmate meiosis I; P:glycolysis; F:fructose-bisphosphate aldolase activity; P:protein amino aci…
ESTAGB1WB003354	F:binding
ESTAGB1WB003356	F:receptor activity; P:signal transduction
ESTAGB1WB003366	F:structural constituent of cuticle
ESTAGB1WB003369	P:cellular carbohydrate metabolic process; F:ATP citrate synthase activity; F:ATP binding; F:succinate-CoA ligase (ADP-forming) activity; P:reductive tricarboxylic acid cycle; C:succinate-CoA ligase complex
ESTAGB1WB003378	P:autophagic cell death; F:cysteine-type endopeptidase activity; P:proteolysis
ESTAGB1WB003379	F:acyltransferase activity; P:acyl-carrier-protein biosynthetic process
ESTAGB1WB003388	P:DNA replication initiation
ESTAGB1WB003412	F:transferase activity; F:retinol dehydratase activity
ESTAGB1WB003414	F:structural constituent of ribosome; C:large ribosomal subunit; P:translation; P:ribosome biogenesis
ESTAGB1WB003421	P:salivary gland cell autophagic cell death; P:autophagy
ESTAGB1WB003422	C:mitochondrial small ribosomal subunit; F:structural constituent of ribosome; P:ribosome biogenesis
ESTAGB1WB003427	P:cellular carbohydrate metabolic process; C:mitochondrial matrix; F:citrate (Si)-synthase activity; P:tricarboxylic acid cycle; P:glyoxylate metabolic process
ESTAGB1WB003435	C:cytosol; F:enoyl-[acyl-carrier-protein] reductase (NADPH, B-specific) activity; F:[acyl-carrier-protein] S-malonyltransferase activity; F:oleoyl-[acyl-carrier-protein] hydrolase activity; F:protein binding; F:3-oxoacyl-[acyl-carrier-protein] reductase activity; F:3-oxoacyl-[acyl-carrier-protein] synthase activity; C:Golgi apparatus; F:[acyl-carrier-protein] S-acetyltransferase activity; C:fatty…
ESTAGB1WB003436	P:oxidation reduction; F:binding; F:oxidoreductase activity; P:metabolic process; F:catalytic activity
ESTAGB1WB003437	F:structural constituent of cuticle
ESTAGB1WB003439	F:translation release factor activity; P:translational termination
ESTAGB1WB003442	C:integral to membrane
ESTAGB1WB003444	P:olfactory behavior; C:lipid particle
ESTAGB1WB003445	F:transition metal ion binding; C:membrane part; C:mitochondrion; P:electron transport chain
ESTAGB1WB003456	P:response to radiation; P:wing disc dorsal/ventral pattern formation; C:germline ring canal; P:germarium-derived oocyte fate determination; P:regulation of mitosis; F:monooxygenase activity; F:protein kinase C inhibitor activity; P:oocyte microtubule cytoskeleton polarization; P:DNA damage checkpoint; F:protein domain specific binding; P:nonassociative learning; C:chromosome; P:mitotic cell cycl…
ESTAGB1WB003460	P:regulation of cell shape; P:myoblast fusion; F:actin binding; P:cell adhesion; C:contractile fiber
ESTAGB1WB003465	P:vesicle-mediated transport; F:NAD(P)H oxidase activity; P:neuromuscular junction development; F:calcium ion binding; C:synaptic vesicle; P:oxidation reduction; P:synaptic transmission; F:calcium sensitive guanylate cyclase activator activity
ESTAGB1WB003467	F:transporter activity; C:intracellular; P:transport
ESTAGB1WB003468	P:protein folding; P:response to stress; C:mitochondrial matrix; F:ATP binding
ESTAGB1WB003471	P:oxidation reduction; F:binding; F:oxidoreductase activity; P:metabolic process; F:catalytic activity
ESTAGB1WB003472	F:oxidoreductase activity
ESTAGB1WB003481	F:hydrogen ion transmembrane transporter activity; C:mitochondrial proton-transporting ATP synthase complex, coupling factor F(o); P:ATP synthesis coupled proton transport
ESTAGB1WB003488	F:binding; P:metabolic process; F:catalytic activity
ESTAGB1WB003489	F:adenylate kinase activity; F:purine ribonucleotide binding; C:mitochondrion; P:purine base metabolic process; P:ATP metabolic process
ESTAGB1WB003502	C:mitochondrial large ribosomal subunit; F:structural constituent of ribosome; P:ribosome biogenesis
ESTAGB1WB003505	P:cytokinesis, contractile ring formation; P:mushroom body development; P:axonogenesis; P:leg segmentation; P:female gonad development; P:establishment of ommatidial polarity; P:actin filament polymerization; P:establishment of imaginal disc-derived wing hair orientation; F:actin binding; C:intracellular; P:regulation of lamellipodium assembly; P:border follicle cell migration; P:actin filament d…
ESTAGB1WB003519	F:structural constituent of cuticle
ESTAGB1WB003520	P:intracellular signaling cascade; F:nucleic acid binding; P:activation of protein kinase C activity by G-protein coupled receptor protein signaling pathway; F:diacylglycerol kinase activity; P:phospholipid catabolic process; P:glycerolipid metabolic process
ESTAGB1WB003522	P:striated muscle contraction; F:ATP binding; F:actin binding; F:nucleotide binding; F:motor activity; C:striated muscle thick filament; C:myosin complex
ESTAGB1WB003532	F:carboxylesterase activity
ESTAGB1WB003533	F:hydrolase activity; F:carboxylesterase activity
ESTAGB1WB003534	F:transferase activity
ESTAGB1WB003538	F:translation initiation factor activity; P:phagocytosis, engulfment; C:ribosome; P:regulation of translational initiation
ESTAGB1WB003540	F:protein transporter activity; P:embryonic development ending in birth or egg hatching; P:synaptic vesicle coating; C:clathrin coat of trans-Golgi network vesicle; C:synaptic vesicle; P:growth; P:reproduction; C:clathrin adaptor complex; P:nematode larval development; F:protein binding; P:locomotion; P:intracellular protein transport
ESTAGB1WB003541	F:NAD or NADH binding; F:glycerol-3-phosphate dehydrogenase (NAD+) activity; P:oxidation reduction; P:glycerol-3-phosphate catabolic process; C:glycerol-3-phosphate dehydrogenase complex; F:protein homodimerization activity; P:glycerolipid metabolic process
ESTAGB1WB003550	C:intracellular part
ESTAGB1WB003555	C:cytoplasm
ESTAGB1WB003556	P:metabolic process; F:hydrolase activity
ESTAGB1WB003557	F:nucleic acid binding; F:ATP binding; F:ATP-dependent helicase activity
ESTAGB1WB003567	C:mitochondrial small ribosomal subunit; F:structural constituent of ribosome; P:ribosome biogenesis
ESTAGB1WB003568	F:protein binding
ESTAGB1WB003570	C:integral to membrane
ESTAGB1WB003573	C:lysosomal membrane; C:integral to membrane; F:protein binding; P:transport
ESTAGB1WB003584	P:regulation of transcription from RNA polymerase II promoter; C:nucleolus; C:transcription factor complex; F:single-stranded DNA binding; F:transcription coactivator activity; P:positive regulation of transcription
ESTAGB1WB003585	F:pyruvate carboxylase activity; P:gluconeogenesis; C:lipid particle; C:mitochondrial matrix; F:ATP binding; F:biotin binding; P:tricarboxylic acid cycle; P:alanine metabolic process; P:aspartate metabolic process
ESTAGB1WB003588	F:NAD or NADH binding; C:lipid particle; F:isocitrate dehydrogenase (NADP+) activity; P:oxidation reduction; F:magnesium ion binding; P:isocitrate metabolic process; C:mitochondrion; P:glyoxylate cycle; P:glutathione metabolic process; P:reductive tricarboxylic acid cycle
ESTAGB1WB003601	P:leg disc development; P:negative regulation of antimicrobial humoral response; F:transcription corepressor activity; F:single-stranded DNA binding; C:transcription factor complex; P:negative regulation of transcription
ESTAGB1WB003613	F:transferase activity
ESTAGB1WB003618	C:ribosome; F:structural constituent of ribosome; P:ribosome biogenesis; P:translational elongation
ESTAGB1WB003625	F:nucleic acid binding; F:RNA splicing factor activity, transesterification mechanism; C:nucleus; P:nuclear mRNA splicing, via spliceosome
ESTAGB1WB003626	F:nucleic acid binding; P:regulation of alternative nuclear mRNA splicing, via spliceosome; F:protein binding; C:omega speckle
ESTAGB1WB003628	F:protein binding
ESTAGB1WB003629	F:protein binding
ESTAGB1WB003640	F:kinase activity; F:zinc ion binding; F:protein binding
ESTAGB1WB003641	C:cytoplasm; P:spermatogenesis; F:ATP-dependent helicase activity; F:DNA binding; C:plasma membrane; F:RNA binding; P:multicellular organismal development; F:ATP binding; C:nucleus
ESTAGB1WB003642	C:clathrin coat of trans-Golgi network vesicle; P:vesicle-mediated transport; F:structural molecule activity; P:intracellular protein transport; F:protein binding; C:clathrin coat of coated pit
ESTAGB1WB003643	P:vesicle-mediated transport; C:clathrin coat of coated pit; F:calcium ion binding; C:clathrin coat of trans-Golgi network vesicle; F:protein binding; P:intracellular protein transport; F:structural molecule activity
ESTAGB1WB003650	F:molecular_function; C:integral to membrane; C:endoplasmic reticulum; C:membrane; C:cellular_component
ESTAGB1WB003651	P:response to chemical stimulus
ESTAGB1WB003661	C:intracellular; P:transport; F:transporter activity
ESTAGB1WB003663	P:tRNA aminoacylation for protein translation
ESTAGB1WB003668	P:regulation of circadian sleep/wake cycle, sleep; P:protein amino acid phosphorylation; P:cAMP-mediated signaling; P:anterior/posterior pattern formation, imaginal disc; P:oocyte microtubule cytoskeleton polarization; F:protein binding; P:behavioral response to ethanol; P:memory; P:olfactory learning; P:regulation of pole plasm oskar mRNA localization; P:locomotor rhythm; C:cAMP-dependent protei…
ESTAGB1WB003672	F:alpha-glucosidase activity; F:cation binding; P:starch metabolic process; P:sucrose metabolic process; P:galactose metabolic process; C:alpha-glucosidase II complex
ESTAGB1WB003673	C:integral to membrane; P:amino acid transport
ESTAGB1WB003678	C:cytosol; C:proteasome regulatory particle, lid subcomplex; P:cellular process; P:proteolysis; F:endopeptidase activity
ESTAGB1WB003680	F:cytochrome-c oxidase activity
ESTAGB1WB003685	P:cell migration; P:positive regulation of growth rate; F:sterol transporter activity; P:ecdysis, collagen and cuticulin-based cuticle; C:endocytic vesicle; P:sterol transport; P:body morphogenesis; P:nematode larval development; P:positive regulation of locomotion; C:apical plasma membrane; P:morphogenesis of an epithelium; P:positive regulation of multicellular organism growth
ESTAGB1WB003686	P:metabolic process; F:N-acetyltransferase activity
ESTAGB1WB003689	P:regionalization; C:microtubule cytoskeleton; P:actin cytoskeleton organization; P:anatomical structure formation; C:cytoplasmic part; P:organ development; C:cytoskeletal part
ESTAGB1WB003693	F:transcription regulator activity; P:regulation of transcription
ESTAGB1WB003696	P:muscle organ development; F:GTP binding; F:GTP-dependent protein binding; C:intracellular; C:plasma membrane; P:Ras protein signal transduction; P:actin cytoskeleton organization; F:GTPase activity
ESTAGB1WB003700	P:cellular process; P:multicellular organismal development; C:proteinaceous extracellular matrix
ESTAGB1WB003703	F:6-phosphofructo-2-kinase activity; C:6-phosphofructo-2-kinase/fructose-2,6-biphosphatase 1 complex; P:protein kinase cascade; F:fructose-2,6-bisphosphate 2-phosphatase activity; F:identical protein binding; F:nucleotide binding; P:glycolysis; P:gluconeogenesis; P:fructose 2,6-bisphosphate metabolic process; P:mannose metabolic process
ESTAGB1WB003704	P:lipid metabolic process; F:hydrolase activity, acting on glycosyl bonds; F:protein binding; C:cell part; P:cellular process
ESTAGB1WB003705	F:transferase activity
ESTAGB1WB003713	P:dendrite development; C:recycling endosome; F:protein binding; P:ruffle organization; P:cell adhesion; C:membrane fraction; F:GTP binding; P:protein transport; C:Golgi apparatus; C:ruffle; P:apoptosis; C:early endosome; P:negative regulation of receptor-mediated endocytosis; P:regulation of Rac protein signal transduction; P:cell motility; P:positive regulation of actin filament polymerization;…
ESTAGB1WB003715	P:salivary gland cell autophagic cell death; P:autophagy
ESTAGB1WB003717	F:metal ion binding; F:nuclease activity
ESTAGB1WB003723	F:molecular_function; P:biological_process; F:protein binding; C:cellular_component
ESTAGB1WB003727	F:ATP-dependent DNA helicase activity; P:nucleosome mobilization; P:chromatin assembly or disassembly; P:muscle organ development; F:transcription repressor activity; F:DNA binding; C:polytene chromosome; C:NuRD complex; F:nucleosome binding; P:dendrite morphogenesis; C:replication fork; P:negative regulation of transcription; C:chromatin
ESTAGB1WB003730	C:extracellular region; F:chitin binding; P:chitin metabolic process
ESTAGB1WB003734	F:ligase activity
ESTAGB1WB003736	F:general RNA polymerase II transcription factor activity; C:transcription factor complex; P:regulation of transcription from RNA polymerase II promoter
ESTAGB1WB003738	C:mitochondrial small ribosomal subunit; F:structural constituent of ribosome; P:ribosome biogenesis
ESTAGB1WB003740	F:transferase activity, transferring acyl groups other than amino-acyl groups
ESTAGB1WB003741	F:molecular_function; P:biological_process
ESTAGB1WB003744	C:intracellular; F:DNA binding; F:protein binding; F:transferase activity
ESTAGB1WB003747	F:carboxylesterase activity
ESTAGB1WB003751	P:metabolic process; F:catalytic activity; F:binding; C:lipid particle
ESTAGB1WB003755	P:sequestering of triglyceride; F:phosphatidylinositol-5-phosphate binding; P:insulin receptor signaling pathway; P:R8 cell fate specification; P:peripheral nervous system development; F:specific transcriptional repressor activity; P:ectoderm development; C:plasma membrane; P:negative regulation of transcription; C:transcriptional repressor complex
ESTAGB1WB003757	F:nucleotidyltransferase activity
ESTAGB1WB003759	F:binding; C:cytoplasm; F:translation initiation factor activity; P:RNA metabolic process; F:protein binding; C:cellular_component
ESTAGB1WB003762	C:mitochondrial electron transfer flavoprotein complex; C:lipid particle; F:electron carrier activity; P:oxidative phosphorylation; P:electron transport chain
ESTAGB1WB003767	P:protein folding; C:chaperonin-containing T-complex; C:lipid particle; P:mitotic spindle organization; F:ATP binding; F:unfolded protein binding; F:ATPase activity, coupled; P:centriole replication
ESTAGB1WB003769	P:nucleus localization; P:mitochondrion localization; P:ER localization
ESTAGB1WB003773	F:hydrogen-exporting ATPase activity, phosphorylative mechanism; F:hydrogen ion transporting ATP synthase activity, rotational mechanism; C:vacuolar proton-transporting V-type ATPase, V1 domain; P:ATP synthesis coupled proton transport; F:ATP binding; F:proton-transporting ATPase activity, rotational mechanism; C:proton-transporting ATP synthase complex
ESTAGB1WB003774	C:mitochondrion
ESTAGB1WB003776	C:cytoplasm; C:nuclear pore; F:protein binding; F:protein transporter activity; P:NLS-bearing substrate import into nucleus
ESTAGB1WB003781	F:hydrogen-exporting ATPase activity, phosphorylative mechanism; F:hydrogen ion transporting ATP synthase activity, rotational mechanism; C:mitochondrial proton-transporting ATP synthase complex, catalytic core F(1); P:ATP synthesis coupled proton transport; F:ATP binding; F:proton-transporting ATPase activity, rotational mechanism; C:lipid particle
ESTAGB1WB003785	C:intracellular
ESTAGB1WB003788	C:filopodium; P:apical protein localization; C:extrinsic to membrane; P:establishment or maintenance of epithelial cell apical/basal polarity; C:stereocilium; C:ruffle; P:microvillus assembly; C:cytoskeleton; C:adherens junction; F:actin binding; P:cell migration involved in gastrulation; C:lamellipodium; C:cytoplasm; C:apical part of cell; P:actin filament capping
ESTAGB1WB003791	C:sarcoplasmic reticulum; F:calcium-transporting ATPase activity; F:calcium ion binding; C:integral to membrane; P:ATP biosynthetic process; F:ATP binding; P:calcium ion transport; F:magnesium ion binding
ESTAGB1WB003812	P:cellular process; F:nucleotide binding
ESTAGB1WB003815	C:mitochondrial large ribosomal subunit; F:structural constituent of ribosome; P:translation; P:ribosome biogenesis
ESTAGB1WB003819	F:transferase activity
ESTAGB1WB003822	C:endoplasmic reticulum membrane; P:GPI anchor biosynthetic process; C:integral to membrane; P:cell division
ESTAGB1WB003832	F:actin binding; C:cytoskeleton; F:tropomyosin binding
ESTAGB1WB003834	C:Golgi membrane; F:GTP binding; C:cytoplasmic vesicle membrane; F:protein binding; C:early endosome membrane; C:endoplasmic reticulum; P:small GTPase mediated signal transduction; P:protein transport
ESTAGB1WB003836	F:chromatin binding; C:chromatin; P:chromatin assembly or disassembly; C:nucleus
ESTAGB1WB003837	F:molecular_function; C:cellular_component
ESTAGB1WB003839	F:endopeptidase activity; C:proteasome regulatory particle; P:regulation of exit from mitosis; P:proteolysis
ESTAGB1WB003843	F:nucleic acid binding; F:nucleotide binding
ESTAGB1WB003849	C:cytoplasm; F:guanosine-diphosphatase activity; F:uridine-diphosphatase activity
ESTAGB1WB003853	F:nucleic acid binding
ESTAGB1WB003854	P:protein amino acid phosphorylation; P:reproduction; P:adaptation of rhodopsin mediated signaling; P:metarhodopsin inactivation; P:embryonic development ending in birth or egg hatching; P:centriole replication; P:positive regulation of growth rate; P:kinetochore organization; P:mitotic spindle organization; P:positive regulation of NFAT protein import into nucleus; C:rhabdomere; F:calcium ion bi…
ESTAGB1WB003860	F:structural constituent of cuticle
ESTAGB1WB003862	F:molecular_function; P:biological_process; F:protein binding; C:cellular_component
ESTAGB1WB003865	C:lipid particle; F:electron carrier activity; C:mitochondrial matrix; P:oxidation reduction; P:fatty acid beta-oxidation; F:acyl-CoA dehydrogenase activity; F:FAD binding; P:electron transport chain
ESTAGB1WB003867	C:nucleus; F:DNA binding; C:intracellular
ESTAGB1WB003869	F:protein binding; P:intracellular protein transport; P:phagocytosis, engulfment; C:COPI vesicle coat; F:structural molecule activity
ESTAGB1WB003875	F:receptor activity; P:regulation of protein ubiquitination; P:signal transduction
ESTAGB1WB003885	P:axon guidance; P:dorsal closure, amnioserosa morphology change; P:regulation of cell shape; F:protein binding; P:transforming growth factor beta receptor signaling pathway; P:cellularization; P:dorsal appendage formation; P:dendrite morphogenesis; C:rhabdomere; F:GTP binding; P:cell division; P:actin filament polymerization; F:sphingomyelin phosphodiesterase activity; P:phagocytosis, engulfment…
ESTAGB1WB003893	F:chitin binding; P:chitin metabolic process; C:extracellular region
ESTAGB1WB003894	F:protein binding; C:nucleus; C:nucleolus
ESTAGB1WB003900	F:protein N-terminus binding; P:Wnt receptor signaling pathway; F:beta-catenin binding; F:protein serine/threonine kinase activity; F:protein phosphatase regulator activity; F:ATP binding; P:protein amino acid autophosphorylation; C:Sin3 complex; C:catenin complex; P:serine family amino acid metabolic process
ESTAGB1WB003907	P:response to oxidative stress; C:cytosol; P:transport; P:positive regulation of apoptosis; C:mitochondrial respiratory chain; C:soluble fraction; F:lipid binding; P:activation of caspase activity by cytochrome c; F:electron transporter, transferring electrons from CoQH2-cytochrome c reductase complex and cytochrome c oxidase complex activity; P:DNA fragmentation involved in apoptosis; F:heme bin…
ESTAGB1WB003910	F:hydrogen-exporting ATPase activity, phosphorylative mechanism; F:hydrogen ion transporting ATP synthase activity, rotational mechanism; C:mitochondrial proton-transporting ATP synthase complex, catalytic core F(1); P:ATP synthesis coupled proton transport; P:growth; P:spermatid development; P:phagocytosis, engulfment; F:ATP binding; F:proton-transporting ATPase activity, rotational mechanism; C…
ESTAGB1WB003912	F:inositol-1(or 4)-monophosphatase activity; P:streptomycin biosynthetic process
ESTAGB1WB003915	C:integral to membrane; F:gap junction channel activity; C:gap junction; P:transport; P:cell-cell signaling
ESTAGB1WB003918	C:intracellular membrane-bounded organelle; C:cytoplasmic part
ESTAGB1WB003923	C:protein complex; P:transcription; C:nucleus
ESTAGB1WB003936	P:actomyosin structure organization; F:actin binding
ESTAGB1WB003937	C:mRNA cap binding complex; F:RNA 7-methylguanosine cap binding; C:RNA-induced silencing complex; F:endoribonuclease activity, cleaving siRNA-paired mRNA; P:gene silencing by miRNA, negative regulation of translation; C:micro-ribonucleoprotein complex; F:siRNA binding; P:negative regulation of translational initiation; P:pre-microRNA processing; P:gene silencing by miRNA, mRNA cleavage; C:RNA pol…
ESTAGB1WB003938	C:cytoskeleton; C:cytoplasm; F:ATP binding; F:protein binding
ESTAGB1WB003939	C:cytoplasm; C:nucleolus; C:heterogeneous nuclear ribonucleoprotein complex; C:nucleoplasm; F:RNA binding; F:protein binding; F:single-stranded DNA binding; P:signal transduction; P:nuclear mRNA splicing, via spliceosome
ESTAGB1WB003943	F:metal ion binding; P:developmental process; C:intracellular part
ESTAGB1WB003946	F:molecular_function; C:cellular_component
ESTAGB1WB003950	F:oxidoreductase activity; F:transition metal ion binding
ESTAGB1WB003963	P:cell cycle arrest; C:cytosol; P:ubiquitin-dependent protein catabolic process; C:SCF ubiquitin ligase complex; F:ubiquitin protein ligase binding; P:organ morphogenesis; P:negative regulation of cell proliferation; F:ubiquitin-protein ligase activity; P:induction of apoptosis by intracellular signals; P:positive regulation of ubiquitin-protein ligase activity during mitotic cell cycle; P:G1/S t…
ESTAGB1WB003964	C:perinuclear region of cytoplasm; C:nucleus; C:polytene chromosome interband
ESTAGB1WB003967	F:aldehyde dehydrogenase [NAD(P)+] activity; F:retinal dehydrogenase activity; C:cytoplasm; P:oxidation reduction; P:gluconeogenesis; P:glycolysis; P:histidine metabolic process; P:L-phenylalanine metabolic process; P:tyrosine metabolic process; P:retinol metabolic process
ESTAGB1WB003970	P:GPI anchor biosynthetic process; P:protein amino acid O-linked mannosylation; F:dolichyl-phosphate beta-D-mannosyltransferase activity; F:dolichyl-phosphate-mannose-protein mannosyltransferase activity; C:endoplasmic reticulum membrane; C:alpha-1,6-mannosyltransferase complex
ESTAGB1WB003972	C:cytoplasm; C:nucleolus; F:GTP binding; F:protein binding; P:mitosis; F:ATP binding; P:rRNA processing
ESTAGB1WB003976	C:A band
ESTAGB1WB003979	P:cell cycle; P:'de novo' pyrimidine base biosynthetic process; F:transcription regulator activity; P:pyrimidine nucleotide biosynthetic process; P:regulation of transcription
ESTAGB1WB003981	P:regulation of membrane potential; F:potassium ion binding; F:inward rectifier potassium channel activity; P:potassium ion transport; C:voltage-gated potassium channel complex
ESTAGB1WB003986	P:gluconeogenesis; F:fructose 1,6-bisphosphate 1-phosphatase activity; F:magnesium ion binding; P:fructose metabolic process; P:mannose metabolic process; P:glycolysis; P:pentose-phosphate shunt; P:carbon utilization
ESTAGB1WB003989	C:lipid particle; F:heme binding; C:membrane
ESTAGB1WB003990	P:metabolic process; F:catalytic activity
ESTAGB1WB003991	P:fatty acid metabolic process; F:oxidoreductase activity; F:binding
ESTAGB1WB004000	P:regulation of heart contraction; F:protein serine/threonine kinase activity; P:erythrocyte development; F:nucleotide binding; C:cytoplasm; P:serine family amino acid metabolic process; P:phosphorylation
ESTAGB1WB004006	C:exocyst; P:exocytosis
ESTAGB1WB004007	F:nucleic acid binding; C:intracellular
ESTAGB1WB004009	P:transport; F:lipid binding; F:transporter activity
ESTAGB1WB004015	P:mesoderm development; F:structural constituent of muscle; P:myofibril assembly; F:motor activity; C:striated muscle thick filament
ESTAGB1WB004016	F:malic enzyme activity; F:metal ion binding; P:oxidation reduction; P:malate metabolic process; F:NAD or NADH binding; F:oxidoreductase activity, acting on the CH-OH group of donors, NAD or NADP as acceptor; P:tricarboxylic acid cycle
ESTAGB1WB004017	F:ATP binding; F:phosphonate transmembrane-transporting ATPase activity; C:membrane; P:phosphonate transport; P:organophosphate ester transport
ESTAGB1WB004020	C:mitochondrial inner membrane; F:oxidoreductase activity
ESTAGB1WB004022	P:regulation of transcription; F:DNA binding; F:transcription factor activity; C:nucleus
ESTAGB1WB004025	F:binding; C:cytoplasmic part
ESTAGB1WB004027	F:binding
ESTAGB1WB004028	C:gap junction; P:morphogenesis of embryonic epithelium; C:integral to membrane; P:olfactory behavior; F:gap junction channel activity; P:foregut morphogenesis; P:transport; P:cell-cell signaling
ESTAGB1WB004032	P:calcitonin catabolic process; P:regulation of systemic arterial blood pressure by endothelin; P:embryonic digit morphogenesis; P:bradykinin catabolic process; F:peptide hormone binding; P:ear development; P:substance P catabolic process; P:heart development; C:membrane fraction; C:Weibel-Palade body; P:positive regulation of receptor recycling; P:regulation of vasoconstriction; P:positive regul…
ESTAGB1WB004036	C:membrane
ESTAGB1WB004041	C:gap junction
ESTAGB1WB004042	F:transcription corepressor activity; C:histone deacetylase complex; C:transcription factor complex; P:negative regulation of transcription
ESTAGB1WB004043	P:DNA replication; F:molecular_function; P:cell cycle; P:biological_process; F:DNA binding; C:nucleus
ESTAGB1WB004046	F:metal ion binding; F:lactoylglutathione lyase activity; F:lyase activity
ESTAGB1WB004051	C:ribosome; C:intracellular membrane-bounded organelle
ESTAGB1WB004055	P:regulation of actin filament polymerization; C:cytoskeleton; P:phagocytosis, engulfment; C:lamellipodium
ESTAGB1WB004063	F:transferase activity
ESTAGB1WB004065	C:mitochondrial small ribosomal subunit; F:structural constituent of ribosome; P:ribosome biogenesis
ESTAGB1WB004067	C:extracellular space; C:oligosaccharyltransferase complex; F:dolichyl-diphosphooligosaccharide-protein glycotransferase activity; P:protein amino acid N-linked glycosylation via asparagine
ESTAGB1WB004080	F:electron carrier activity; C:mitochondrial matrix; F:short-branched-chain-acyl-CoA dehydrogenase activity; P:oxidation reduction; P:fatty acid metabolic process; F:FAD binding; P:electron transport chain
ESTAGB1WB004082	F:cytochrome-c oxidase activity; P:mitochondrial electron transport, cytochrome c to oxygen; P:proton transport; C:respiratory chain complex IV
ESTAGB1WB004085	P:cellular amino acid biosynthetic process
ESTAGB1WB004086	F:actin binding; C:intracellular
ESTAGB1WB004087	F:nucleotide binding; F:catalytic activity; P:cellular metabolic process
ESTAGB1WB004089	F:zinc ion binding
ESTAGB1WB004090	F:calcium ion binding; F:motor activity; F:ATPase activity, coupled; C:muscle myosin complex
ESTAGB1WB004091	P:positive regulation of transcription; F:DNA-dependent ATPase activity; F:protein binding; F:nucleotide binding; P:ecdysone receptor-mediated signaling pathway; P:dendrite morphogenesis; F:general RNA polymerase II transcription factor activity; P:nucleosome positioning; P:muscle organ development; C:transcription factor complex; F:nucleic acid binding; C:NURF complex; C:ACF complex; C:chromatin…
ESTAGB1WB004097	F:hydrogen ion transmembrane transporter activity; C:integral to membrane; P:ATP synthesis coupled proton transport; F:lipid binding; C:proton-transporting ATP synthase complex, coupling factor F(o)
ESTAGB1WB004098	F:metalloendopeptidase activity; P:proteolysis; F:zinc ion binding
ESTAGB1WB004099	C:eukaryotic translation initiation factor 3 complex; P:salivary gland cell autophagic cell death; F:translation initiation factor activity; C:ribosome; P:regulation of translational initiation
ESTAGB1WB004101	F:L-cystine transmembrane transporter activity; F:protein binding; P:signal transduction; C:lysosomal membrane; P:L-cystine transport
ESTAGB1WB004109	C:nucleolus
ESTAGB1WB004110	F:acyltransferase activity; C:cell part; F:protein binding; P:acyl-carrier-protein biosynthetic process
ESTAGB1WB004126	F:protein kinase activity; P:cellular process; F:nucleotide binding
ESTAGB1WB004130	C:mitochondrial intermembrane space; F:adenylate kinase activity; F:ATP binding; P:purine base metabolic process; P:ATP metabolic process
ESTAGB1WB004133	F:adenylosuccinate synthase activity; P:purine nucleotide biosynthetic process; F:magnesium ion binding; F:GTP binding; P:purine base metabolic process; P:alanine metabolic process; P:aspartate metabolic process
ESTAGB1WB004136	F:hydrolase activity
ESTAGB1WB004140	P:ATP-dependent chromatin remodeling; P:positive regulation of transcription; F:DNA-dependent ATPase activity; F:protein binding; F:nucleosome binding; F:ATP-dependent helicase activity; P:ecdysone receptor-mediated signaling pathway; P:dendrite morphogenesis; F:general RNA polymerase II transcription factor activity; P:nucleosome positioning; F:transferase activity; P:muscle organ development; C…
ESTAGB1WB004148	F:RNA 7-methylguanosine cap binding; F:protein binding; F:translation initiation factor activity; C:nucleus; C:RNA polymerase complex; C:ribosome; P:regulation of translational initiation
ESTAGB1WB004154	F:binding; F:malic enzyme activity; F:oxidoreductase activity, acting on the CH-OH group of donors, NAD or NADP as acceptor; P:tricarboxylic acid cycle; P:malate metabolic process
ESTAGB1WB004161	F:ubiquinol-cytochrome-c reductase activity; F:zinc ion binding; C:mitochondrial respiratory chain complex III; F:metalloendopeptidase activity; P:proteolysis; P:mitochondrial electron transport, ubiquinol to cytochrome c; P:protein processing; C:mitochondrial processing peptidase complex; C:lipid particle; P:electron transport chain; P:proton transport;
ESTAGB1WB004163	F:molecular_function; C:ribosome; C:cellular_component
ESTAGB1WB004165	F:transferase activity
ESTAGB1WB004166	C:proton-transporting ATP synthase complex, catalytic core F(1); F:hydrogen ion transporting ATP synthase activity, rotational mechanism; P:ATP synthesis coupled proton transport; F:proton-transporting ATPase activity, rotational mechanism
ESTAGB1WB004167	F:binding
ESTAGB1WB004173	P:protein amino acid phosphorylation; F:ATP binding; F:cGMP-dependent protein kinase activity; P:serine family amino acid metabolic process
ESTAGB1WB004175	C:ATP-binding cassette (ABC) transporter complex; C:integral to membrane; F:ATPase activity; F:ATP binding; F:transporter activity; P:transport
ESTAGB1WB004184	P:mitotic spindle elongation; P:centrosome organization; C:proteasome core complex; P:cell proliferation; C:nucleus; C:cytosol; F:threonine-type endopeptidase activity; P:proteolysis involved in cellular protein catabolic process
ESTAGB1WB004186	C:cytoplasm; P:dendrite morphogenesis; F:transcription coactivator activity; P:central nervous system development; F:sequence-specific DNA binding; P:open tracheal system development; C:transcription factor complex; P:positive regulation of transcription
ESTAGB1WB004188	P:regulation of transcription from RNA polymerase II promoter; C:transcriptional repressor complex; C:nucleolus; P:chromatin assembly or disassembly; F:protein C-terminus binding; F:DNA binding; C:chromatin; C:SWI/SNF complex; F:transcription coactivator activity; P:negative regulation of transcription, DNA-dependent; P:positive regulation of transcription, DNA-dependent; F:chromatin binding; P:c…
ESTAGB1WB004191	P:regulation of protein catabolic process; F:endopeptidase activity; F:binding; C:proteasome regulatory particle; F:enzyme regulator activity; P:proteolysis; C:cytosol
ESTAGB1WB004193	F:catalytic activity; C:lipid particle
ESTAGB1WB004194	C:mitochondrial outer membrane
ESTAGB1WB004200	F:adenylate kinase activity; F:protein binding; C:nucleus; C:cytosol; F:nucleotide binding; F:nucleoside kinase activity; P:purine base metabolic process; P:ATP metabolic process
ESTAGB1WB004202	F:hydrolase activity, hydrolyzing O-glycosyl compounds; P:response to sucrose stimulus; P:response to iron(II) ion; P:response to estrogen stimulus; P:response to nutrient; C:brush border; P:response to drug; P:response to starvation; P:response to lead ion; P:response to nickel ion; P:response to ethanol; F:transferase activity; P:response to hypoxia; P:carbohydrate metabolic process
ESTAGB1WB004204	F:oxidoreductase activity
ESTAGB1WB004205	P:metabolic process; F:oxidoreductase activity
ESTAGB1WB004209	P:spermatid development; C:integral to membrane; C:membrane; P:ossification; F:molecular_function; P:multicellular organismal development; P:cell differentiation; C:extracellular region; F:protein binding
ESTAGB1WB004212	F:glutamine-fructose-6-phosphate transaminase (isomerizing) activity; P:carbohydrate biosynthetic process; C:cytoplasm; F:sugar binding; P:amino sugar metabolic process
ESTAGB1WB004214	C:eukaryotic translation initiation factor 3 complex; F:translation initiation factor activity; C:cytosol; C:ribosome; P:regulation of translational initiation
ESTAGB1WB004215	C:cytoplasm; P:mRNA catabolic process; F:U6 snRNA binding; C:ribonucleoprotein complex; C:nucleus; F:protein heterodimerization activity; P:nuclear mRNA splicing, via spliceosome
ESTAGB1WB004219	P:translation; C:cytoplasmic membrane-bounded vesicle; F:hydrolase activity; F:aminoacyl-tRNA hydrolase activity; P:positive regulation of growth rate
ESTAGB1WB004226	P:lipid metabolic process; F:hydrolase activity; F:catalytic activity
ESTAGB1WB004229	C:mitochondrial respiratory chain complex I
ESTAGB1WB004232	P:regulation of pole plasm oskar mRNA localization; C:nascent polypeptide-associated complex
ESTAGB1WB004236	F:molecular_function; P:biological_process
ESTAGB1WB004237	F:protein tyrosine phosphatase activity; C:synaptosome; P:synaptic transmission; F:SH3 domain binding; P:protein amino acid dephosphorylation; P:tyrosine metabolic process
ESTAGB1WB004239	F:protein phosphatase type 2A regulator activity; C:protein phosphatase type 2A complex; P:signal transduction; P:anti-apoptosis
ESTAGB1WB004240	F:translation elongation factor activity; F:GTP binding; P:signal transduction; F:GTPase activity; C:ribosome; P:regulation of translational elongation
ESTAGB1WB004241	F:protein binding; P:cellular metabolic process; P:cell cycle; C:nucleus
ESTAGB1WB004245	C:mitochondrial envelope; P:transport; P:cellular process; C:membrane; F:transporter activity
ESTAGB1WB004251	P:organ development
ESTAGB1WB004256	C:cell wall; C:cell surface; C:membrane
ESTAGB1WB004258	F:molecular_function; C:cellular_component
ESTAGB1WB004260	P:response to oxidative stress; P:determination of adult life span; F:hydrogen-exporting ATPase activity, phosphorylative mechanism; F:hydrogen ion transporting ATP synthase activity, rotational mechanism; C:mitochondrial proton-transporting ATP synthase complex, catalytic core F(1); P:ATP synthesis coupled proton transport; F:proton-transporting ATPase activity, rotational mechanism
ESTAGB1WB004266	F:sequence-specific DNA binding; F:protein dimerization activity; P:cell cycle; P:signal transduction; F:transcription factor activity; P:regulation of transcription, DNA-dependent; P:interspecies interaction between organisms; C:transcription factor complex
ESTAGB1WB004272	P:transport; C:integral to membrane
ESTAGB1WB004277	C:cytosol; F:translation initiation factor activity; C:ribosome; P:regulation of translational initiation
ESTAGB1WB004280	F:3-hydroxyacyl-CoA dehydrogenase activity; F:binding; C:mitochondrial matrix; P:isoleucine catabolic process; P:leucine catabolic process; P:lysine catabolic process; P:tryptophan metabolic process; P:valine catabolic process; P:fatty acid biosynthetic process; P:benzoate metabolic process
ESTAGB1WB004281	P:Golgi organization; C:Golgi apparatus; C:cytosol
ESTAGB1WB004286	P:lipid biosynthetic process; C:integral to membrane; C:membrane; P:fatty acid biosynthetic process
ESTAGB1WB004289	F:protein binding
ESTAGB1WB004304	P:dendrite morphogenesis; P:muscle organ development; F:protein binding; F:transcription factor activity; F:zinc ion binding; C:transcription factor complex; P:regulation of transcription
ESTAGB1WB004305	C:extracellular region
ESTAGB1WB004306	P:biological_process; C:cellular_component
ESTAGB1WB004314	P:nematode larval development; F:protein binding; C:mitochondrial matrix; P:positive regulation of growth rate; P:fatty acid beta-oxidation; F:lyase activity
ESTAGB1WB004318	P:negative regulation of ubiquitin-protein ligase activity during mitotic cell cycle; C:nucleolus; C:proteasome regulatory particle; P:anaphase-promoting complex-dependent proteasomal ubiquitin-dependent protein catabolic process; P:positive regulation of ubiquitin-protein ligase activity during mitotic cell cycle; C:cytoplasm
ESTAGB1WB004319	P:protein transport
ESTAGB1WB004325	F:Ran GTPase binding; P:protein export from nucleus; C:nuclear pore; F:nuclear export signal receptor activity; C:cytoplasm; P:signal transduction
ESTAGB1WB004332	P:cell motility; P:organ morphogenesis; P:cell adhesion; P:cell differentiation; P:open tracheal system development
ESTAGB1WB004337	C:striated muscle thin filament; F:actin binding
ESTAGB1WB004342	P:cellular aldehyde metabolic process; P:oxidation reduction; F:aldehyde dehydrogenase [NAD(P)+] activity; P:gluconeogenesis; P:glycolysis; P:histidine metabolic process; P:L-phenylalanine metabolic process; P:tyrosine metabolic process
ESTAGB1WB004346	F:deoxyhypusine monooxygenase activity; F:binding; P:peptidyl-lysine modification to hypusine
ESTAGB1WB004355	F:receptor activity; C:integral to membrane; P:biological_process
ESTAGB1WB004360	F:acyl-CoA binding
ESTAGB1WB004369	F:structural constituent of cuticle
ESTAGB1WB004382	F:metal ion binding
ESTAGB1WB004386	C:mitochondrion; P:ubiquinone biosynthetic process; P:biological_process; C:cellular_component
ESTAGB1WB004388	F:metalloendopeptidase activity; F:ATP binding; F:microtubule-severing ATPase activity; C:integral to membrane; P:proteolysis; F:zinc ion binding
ESTAGB1WB004390	P:regulation of cell proliferation; F:transcription corepressor activity; F:histone acetyltransferase activity; P:chromatin silencing; P:regulation of Wnt receptor signaling pathway; C:Ino80 complex; C:NuA4 histone acetyltransferase complex; P:histone exchange; F:ATP binding; F:DNA helicase activity; P:DNA replication; P:histone acetylation; C:transcription factor complex; P:acyl-carrier-protein …
ESTAGB1WB004393	C:membrane; F:cation transmembrane transporter activity; P:cation transport
ESTAGB1WB004395	P:apoptosis; P:response to stress; C:nucleus; P:RNA splicing; F:protein binding
ESTAGB1WB004398	P:cell adhesion; F:protein binding
ESTAGB1WB004401	F:binding; F:fatty-acid synthase activity; F:oxidoreductase activity; C:fatty acid synthase complex; P:fatty acid biosynthetic process; P:acyl-carrier-protein biosynthetic process
ESTAGB1WB004402	F:molecular_function; P:biological_process; C:cellular_component
ESTAGB1WB004405	F:binding; C:intracellular part
ESTAGB1WB004411	C:nucleolus; F:RNA binding
ESTAGB1WB004414	F:identical protein binding; C:nucleus
ESTAGB1WB004418	P:translation; F:zinc ion binding; F:structural constituent of ribosome; F:ubiquitin-protein ligase activity; P:protein ubiquitination; C:mitochondrial small ribosomal subunit; F:protein binding; C:ubiquitin ligase complex; P:ribosome biogenesis
ESTAGB1WB004425	P:protein amino acid glycosylation in endoplasmic reticulum; C:endoplasmic reticulum lumen; P:negative regulation of Notch signaling pathway; F:glycogenin glucosyltransferase activity
ESTAGB1WB004434	P:vesicle-mediated transport; P:negative regulation of dendrite morphogenesis; P:chitin-based larval cuticle pattern formation; C:ER to Golgi transport vesicle; P:embryonic heart tube development; F:GTPase activity; P:intracellular protein transport; C:lipid particle; C:endoplasmic reticulum; F:GTP binding
ESTAGB1WB004435	F:chitin binding; P:chitin metabolic process; C:extracellular region
ESTAGB1WB004436	P:cellular process; P:proteolysis; F:cobalt ion binding; F:metalloexopeptidase activity; F:aminopeptidase activity
ESTAGB1WB004438	P:positive regulation of cell cycle; P:regulation of protein complex assembly; F:identical protein binding; P:reactivation of latent virus; F:transcription factor activity; C:MLL5-L complex; F:transcription coactivator activity; C:cytoplasm; P:transcription from RNA polymerase II promoter; C:transcription factor complex; P:positive regulation of transcription
ESTAGB1WB004440	P:ATP-dependent chromatin remodeling; P:positive regulation of transcription; F:DNA-dependent ATPase activity; F:protein binding; F:nucleosome binding; F:ATP-dependent helicase activity; P:ecdysone receptor-mediated signaling pathway; P:dendrite morphogenesis; F:general RNA polymerase II transcription factor activity; P:nucleosome positioning; P:muscle organ development; C:transcription factor co…
ESTAGB1WB004448	F:translation initiation factor activity; P:integrin-mediated signaling pathway; C:lamin filament; F:ribosome binding; F:protein binding; P:mature ribosome assembly; C:ribosome; P:regulation of translational initiation
ESTAGB1WB004449	F:binding
ESTAGB1WB004458	F:nucleoside-triphosphatase activity
ESTAGB1WB004459	F:electron carrier activity; P:metabolic process; F:catalytic activity; C:membrane; F:NADH dehydrogenase (ubiquinone) activity
ESTAGB1WB004462	F:transferase activity; F:glutathione transferase activity
ESTAGB1WB004469	F:ubiquinol-cytochrome-c reductase activity; P:oxidation reduction; F:oxidoreductase activity; P:mitochondrial electron transport, ubiquinol to cytochrome c
ESTAGB1WB004474	P:apical protein localization; C:subapical complex; C:lamellipodium; C:filopodium; P:pole plasm protein localization; P:olfactory behavior; P:establishment or maintenance of epithelial cell apical/basal polarity; P:establishment or maintenance of polarity of larval imaginal disc epithelium; F:actin binding; C:ruffle; C:fusome; P:regulation of membrane potential in photoreceptor cell; C:cytoskelet…
ESTAGB1WB004476	C:ribosome; C:mitochondrion
ESTAGB1WB004483	P:nucleotide catabolic process; F:hydrolase activity
ESTAGB1WB004490	P:negative regulation of smoothened signaling pathway; F:protein serine/threonine kinase activity; P:phagocytosis, engulfment; F:ATP binding; P:regulation of Wnt receptor signaling pathway; P:regulation of proteolysis; C:cytoplasm; C:nucleus; P:protein amino acid phosphorylation; P:serine family amino acid metabolic process
ESTAGB1WB004492	C:cytosol; F:ubiquitin thiolesterase activity; P:negative regulation of ubiquitin-protein ligase activity during mitotic cell cycle; F:zinc ion binding; F:endopeptidase activity; P:protein K63-linked deubiquitination; F:metallopeptidase activity; P:anaphase-promoting complex-dependent proteasomal ubiquitin-dependent protein catabolic process; P:positive regulation of ubiquitin-protein ligase acti…
ESTAGB1WB004494	F:nucleic acid binding
ESTAGB1WB004503	F:nucleoside-triphosphatase activity; P:metabolic process; F:serine-type peptidase activity; F:nucleotide binding
ESTAGB1WB004508	F:molecular_function; P:biological_process
ESTAGB1WB004510	F:molecular_function; P:biological_process; C:cellular_component
ESTAGB1WB004511	C:myosin complex; F:nucleotide binding
ESTAGB1WB004512	C:integral to membrane; C:membrane
ESTAGB1WB004515	F:translation elongation factor activity; C:mitochondrion; F:nucleotide binding; F:GTPase activity; C:ribosome; P:regulation of translational elongation
ESTAGB1WB004522	F:molecular_function; C:integral to membrane; C:membrane; P:biological_process
ESTAGB1WB004523	C:mitochondrion
ESTAGB1WB004527	C:mitochondrial proton-transporting ATP synthase complex, coupling factor F(o); C:lipid particle; P:proton transport
ESTAGB1WB004531	F:binding; C:mitochondrion; P:regulation of apoptosis
ESTAGB1WB004537	F:sugar binding
ESTAGB1WB004539	F:RNA binding; F:ATP binding; F:5-formyltetrahydrofolate cyclo-ligase activity; F:nucleotide binding; P:folic acid and derivative biosynthetic process
ESTAGB1WB004540	C:nucleus; F:protein binding; F:DNA binding
ESTAGB1WB004542	F:protein transporter activity; P:compound eye pigmentation; P:synaptic vesicle coating; C:synaptic vesicle; P:ommochrome biosynthetic process; P:neurotransmitter secretion; C:membrane coat; F:protein binding; P:intracellular protein transport; P:lysosome organization
ESTAGB1WB004547	F:ligase activity; P:lipid metabolic process; F:nucleotide binding
ESTAGB1WB004551	F:transporter activity; C:intracellular; P:transport
ESTAGB1WB004552	F:metal ion binding
ESTAGB1WB004556	F:binding
ESTAGB1WB004558	P:localization; P:germarium-derived egg chamber formation; C:germline ring canal; P:learning or memory; P:cell differentiation; P:organ development; P:ring canal formation
ESTAGB1WB004559	F:zinc ion binding; P:chromatin assembly or disassembly; F:enzyme binding; P:myeloid cell differentiation; C:kinetochore; C:chromatin; F:transcription factor binding; P:negative regulation of transcription; F:histone acetyltransferase activity; P:histone acetylation; F:chromatin binding; P:positive regulation of transcription; C:transcription factor complex; C:histone acetyltransferase complex; P…
ESTAGB1WB004562	F:nucleic acid binding; F:ATP binding; F:ATP-dependent helicase activity
ESTAGB1WB004570	P:phototransduction; F:voltage-gated anion channel activity; C:Nebenkern; C:lipid particle; C:membrane; P:anion transport
ESTAGB1WB004573	C:integral to membrane; P:copper ion transport; F:copper ion transmembrane transporter activity
ESTAGB1WB004576	C:integral to membrane; P:copper ion transport; F:copper ion transmembrane transporter activity
ESTAGB1WB004578	P:transport; C:integral to membrane; F:transporter activity
ESTAGB1WB004581	P:cell redox homeostasis; F:electron carrier activity; F:protein disulfide oxidoreductase activity; C:cellular_component
ESTAGB1WB004582	C:mitochondrion
ESTAGB1WB004584	F:monooxygenase activity; C:cytoplasmic part
ESTAGB1WB004588	C:cell part
ESTAGB1WB004592	F:ligase activity
ESTAGB1WB004593	P:R8 cell differentiation; P:imaginal disc-derived wing vein morphogenesis; P:protein import into nucleus, docking; P:wing cell fate specification; P:rhabdomere development; P:cell proliferation; F:Ran GTPase binding; P:epidermal growth factor receptor signaling pathway; F:protein transmembrane transporter activity; P:negative regulation of neuron apoptosis; C:nuclear pore; P:compound eye cone ce…
ESTAGB1WB004595	P:wing disc dorsal/ventral pattern formation; P:regulation of cell shape; P:actin polymerization or depolymerization; F:actin binding; P:oocyte microtubule cytoskeleton polarization; P:bristle morphogenesis; P:compound eye development
ESTAGB1WB004601	P:rRNA modification; F:rRNA (adenine-N6,N6-)-dimethyltransferase activity
ESTAGB1WB004605	F:lysozyme activity
ESTAGB1WB004607	C:cytoplasm; F:beta-catenin binding; P:negative regulation of Wnt receptor signaling pathway; P:eye-antennal disc morphogenesis; P:phagocytosis, engulfment; P:oogenesis; C:catenin complex
ESTAGB1WB004612	C:neuromuscular junction; F:amino acid transmembrane transporter activity; P:glutamine transport; P:taurine transport; P:male courtship behavior; C:integral to membrane; P:chemosensory behavior; P:glutamate secretion; P:L-glutamate transport
ESTAGB1WB004614	F:6,7-dihydropteridine reductase activity; P:folic acid biosynthetic process
ESTAGB1WB004615	F:binding
ESTAGB1WB004616	F:nucleic acid binding
ESTAGB1WB004617	P:apoptosis; F:calcium ion binding; P:biological_process; C:nucleus
ESTAGB1WB004626	P:one-carbon compound metabolic process; F:zinc ion binding; F:lyase activity; F:carbonate dehydratase activity
ESTAGB1WB004627	F:binding
ESTAGB1WB004628	P:mitotic spindle elongation; F:microtubule binding; F:small GTPase regulator activity; C:microtubule associated complex; P:flight behavior; P:spindle assembly; C:midbody; P:sensory organ development; C:spindle microtubule; P:establishment of mitotic spindle localization; P:chromosome segregation; C:cytoplasmic microtubule; P:positive regulation of gene-specific transcription; C:cytoplasm; C:tubu…
ESTAGB1WB004631	F:protein binding
ESTAGB1WB004635	C:integral to membrane; P:sphingomyelin biosynthetic process
ESTAGB1WB004636	P:dorsal closure, amnioserosa morphology change; P:germ cell migration; P:Wnt receptor signaling pathway; P:cellularization; P:dendrite morphogenesis; P:branch fusion, open tracheal system; P:dorsal closure, spreading of leading edge cells; F:GTP binding; P:neuroblast proliferation; P:germ-band extension; P:myofibril assembly; P:establishment of imaginal disc-derived wing hair orientation; P:epid…
ESTAGB1WB004642	F:serine-type peptidase activity; F:ATP-dependent peptidase activity; F:mitochondrial light strand promoter anti-sense binding; F:mitochondrial light strand promoter sense binding; F:mitochondrial heavy strand promoter anti-sense binding; P:aging; P:response to aluminum ion; F:ADP binding; P:oxidation-dependent protein catabolic process; F:single-stranded DNA binding; C:mitochondrial nucleoid; F:…
ESTAGB1WB004644	F:transcription regulator activity; P:regulation of transcription; C:nucleus
ESTAGB1WB004646	C:plasma membrane; F:binding; P:mesoderm development
ESTAGB1WB004651	C:ribosome
ESTAGB1WB004655	F:hydrogen-exporting ATPase activity, phosphorylative mechanism; F:hydrogen ion transporting ATP synthase activity, rotational mechanism; C:mitochondrial proton-transporting ATP synthase complex, catalytic core F(1); P:ATP synthesis coupled proton transport; P:phagocytosis, engulfment; F:proton-transporting ATPase activity, rotational mechanism; C:lipid particle
ESTAGB1WB004674	F:chitin binding; P:chitin metabolic process; C:extracellular region
ESTAGB1WB004675	F:glycine dehydrogenase (decarboxylating) activity; F:pyridoxal phosphate binding; P:oxidation reduction; F:lyase activity; C:glycine cleavage complex; P:glycine metabolic process; P:L-serine metabolic process; P:threonine metabolic process
ESTAGB1WB004681	F:ubiquinol-cytochrome-c reductase activity; F:zinc ion binding; C:mitochondrial respiratory chain complex III; F:metalloendopeptidase activity; P:proteolysis; P:mitochondrial electron transport, ubiquinol to cytochrome c; P:protein processing; C:mitochondrial processing peptidase complex; C:lipid particle; P:electron transport chain; P:proton transport;
ESTAGB1WB004689	P:response to arsenic
ESTAGB1WB004694	F:hydrolase activity
ESTAGB1WB004697	C:integral to membrane
ESTAGB1WB004705	P:nuclear-transcribed mRNA catabolic process, nonsense-mediated decay; F:manganese ion binding; P:gene silencing by miRNA; F:RNA binding; F:hydrolase activity; C:cytoplasmic mRNA processing body
ESTAGB1WB004706	C:cytosol; P:negative regulation of ubiquitin-protein ligase activity during mitotic cell cycle; F:zinc ion binding; P:cell division; P:anaphase-promoting complex-dependent proteasomal ubiquitin-dependent protein catabolic process; F:ubiquitin-protein ligase activity; P:protein ubiquitination; P:positive regulation of ubiquitin-protein ligase activity during mitotic cell cycle; F:protein binding;…
ESTAGB1WB004709	P:DNA replication; F:DNA binding; F:ATP binding; F:DNA ligase (ATP) activity; P:DNA recombination; P:DNA repair
ESTAGB1WB004711	F:metal ion binding; P:protein modification process; F:acid-amino acid ligase activity
ESTAGB1WB004713	F:hydrolase activity; P:biological_process; F:peptidase activity
ESTAGB1WB004714	P:male germ-line stem cell division
ESTAGB1WB004718	F:GTP binding; P:Golgi to plasma membrane transport; P:vesicle fusion; P:intracellular protein transport; C:nucleus; C:cytosol; F:GTPase activity
ESTAGB1WB004725	P:nuclear envelope organization; P:organ morphogenesis; C:nuclear envelope
ESTAGB1WB004729	F:binding
ESTAGB1WB004730	P:proteolysis; C:lipid particle; F:cysteine-type endopeptidase activity
ESTAGB1WB004732	C:integral to membrane
ESTAGB1WB004736	F:receptor activity; P:transcription; P:regulation of transcription; C:nucleus
ESTAGB1WB004750	C:ribosome
ESTAGB1WB004753	F:molecular_function; P:biological_process
ESTAGB1WB004754	P:cell proliferation
ESTAGB1WB004755	F:aspartic-type endopeptidase activity; P:salivary gland cell autophagic cell death; P:proteolysis
ESTAGB1WB004761	F:monosaccharide binding; P:pentose-phosphate shunt, oxidative branch; F:6-phosphogluconolactonase activity
ESTAGB1WB004768	P:antimicrobial humoral response
ESTAGB1WB004771	P:neuromuscular synaptic transmission; P:actin filament organization; F:cyclic nucleotide binding; F:cAMP-dependent protein kinase regulator activity; P:oocyte microtubule cytoskeleton polarization; F:kinase activity; P:cAMP-mediated signaling; P:regulation of protein amino acid phosphorylation; P:molting cycle, chitin-based cuticle; P:olfactory learning; C:cAMP-dependent protein kinase complex; …
ESTAGB1WB004773	F:ATPase activity, coupled to transmembrane movement of ions; P:ion transport
ESTAGB1WB004778	F:biliverdin reductase activity; P:chlorophyll metabolic process
ESTAGB1WB004780	F:nucleic acid binding; P:regulation of transcription, DNA-dependent; F:metal ion binding; P:transcription; P:biological_process; F:zinc ion binding; C:intracellular; C:nucleus
ESTAGB1WB004784	F:oxidoreductase activity; P:oxidation reduction
ESTAGB1WB004787	P:transcription
ESTAGB1WB004788	P:protein amino acid phosphorylation; F:RNA polymerase II carboxy-terminal domain kinase activity; F:protein binding; F:ATP binding; F:cyclin-dependent protein kinase activity; P:cell division; P:serine family amino acid metabolic process;
ESTAGB1WB004789	F:receptor activity; F:ER retention sequence binding; P:protein retention in ER lumen; P:vesicle-mediated transport; C:integral to membrane; C:endoplasmic reticulum; P:protein transport; P:signal transduction
ESTAGB1WB004791	C:nucleolus; P:rRNA methylation; F:nucleic acid binding; F:methyltransferase activity
ESTAGB1WB004797	C:nucleolus; F:DNA binding; F:double-stranded RNA binding; F:protein binding; P:positive regulation of transcription, DNA-dependent; F:RNA polymerase II transcription factor activity; C:transcription factor complex; P:regulation of transcription from RNA polymerase II promoter
ESTAGB1WB004802	P:regulation of protein catabolic process; P:response to virus; P:mRNA transport; C:Cajal body; F:protein binding; P:multicellular organismal development; P:protein import into nucleus, docking; F:protein transporter activity; P:protein export from nucleus; C:nucleolus; C:cytosol; C:nuclear pore; C:kinetochore; F:RNA binding; C:annulate lamellae; P:regulation of centrosome duplication; C:ribonucl…
ESTAGB1WB004808	F:hydrolase activity; F:carboxylesterase activity
ESTAGB1WB004813	P:inflammatory response; F:dopachrome isomerase activity; C:cytoplasm; F:cytokine activity; F:phenylpyruvate tautomerase activity; C:extracellular region; F:isomerase activity; P:innate immune response; C:extracellular space; P:immune response
ESTAGB1WB004814	F:cysteine-type peptidase activity; P:proteolysis
ESTAGB1WB004821	F:carboxylesterase activity
ESTAGB1WB004822	C:nuclear pore; F:binding; C:cytoplasm; P:protein import into nucleus, docking; P:intracellular protein transport; C:nucleus; F:protein transporter activity
ESTAGB1WB004826	P:modification-dependent protein catabolic process; P:protein modification process; C:intracellular; F:acid-amino acid ligase activity; F:protein binding
ESTAGB1WB004828	P:protein refolding; P:protein targeting to mitochondrion; P:response to heat; F:ATP binding; C:mitochondrial matrix; F:unfolded protein binding; P:'de novo' protein folding; C:lipid particle
ESTAGB1WB004831	C:eukaryotic translation initiation factor 3 complex; P:regulation of translational initiation; F:translation initiation factor activity; C:ribosome
ESTAGB1WB004845	F:nucleic acid binding; F:nucleotide binding
ESTAGB1WB004853	F:Notch binding; P:regulation of R8 cell spacing in compound eye; P:negative regulation of neurogenesis; P:dorsal/ventral lineage restriction, imaginal disc; C:endocytic vesicle; P:actin filament organization; P:negative regulation of terminal cell fate specification, open tracheal system; P:ectodermal cell fate specification; P:mesodermal cell fate specification; P:immune response; P:oocyte ante…
ESTAGB1WB004857	F:calcium ion binding
ESTAGB1WB004858	F:receptor activity; P:signal transduction
ESTAGB1WB004863	P:axon guidance; F:cell adhesion molecule binding; P:maintenance of epithelial integrity, open tracheal system; P:regulation of cell shape; P:heterophilic cell adhesion; P:tracheal outgrowth, open tracheal system; P:myofibril assembly; P:midgut development; P:maintenance of protein location; C:integrin complex; P:muscle attachment; P:epithelial cell migration, open tracheal system; F:receptor act…
ESTAGB1WB004865	F:transferase activity; F:Rho guanyl-nucleotide exchange factor activity; P:regulation of Rho protein signal transduction; C:intracellular
ESTAGB1WB004870	F:ATP binding; P:response to stress
ESTAGB1WB004874	F:molecular_function; C:cellular_component
ESTAGB1WB004885	F:protein kinase activity; F:ATP binding; F:nucleotide binding; C:mitochondrial respiratory chain complex I; F:protein tyrosine kinase activity; P:protein amino acid phosphorylation; P:biological_process
ESTAGB1WB004886	C:cytoplasm; C:cell-cell junction; C:basolateral plasma membrane; P:morphogenesis of embryonic epithelium; F:protein binding; P:asymmetric protein localization; P:astrocyte cell migration
ESTAGB1WB004887	F:nucleoside-triphosphatase activity; C:membrane part; F:nucleotide binding
ESTAGB1WB004889	C:integral to membrane; C:membrane
ESTAGB1WB004893	F:DNA binding; C:nucleus
ESTAGB1WB004894	C:cytoplasm; P:Rac protein signal transduction; P:neuron remodeling; F:Rho guanyl-nucleotide exchange factor activity; P:regulation of GTPase activity
ESTAGB1WB004896	P:peptide metabolic process; C:secretory granule; C:axon; C:soluble fraction; P:acetylcholine secretion; F:carboxypeptidase activity; F:cobalt ion binding; C:cell soma; C:extracellular space; C:membrane fraction; F:protein binding; P:insulin processing; C:Golgi apparatus
ESTAGB1WB004899	C:cytoplasmic vesicle
ESTAGB1WB004900	F:ATP binding; P:cellular metal ion homeostasis
ESTAGB1WB004906	P:dorsal closure; P:head involution; P:negative regulation of JNK cascade; C:cell leading edge; F:zinc ion binding; P:embryonic pattern specification
ESTAGB1WB004907	F:molecular_function; C:cellular_component
ESTAGB1WB004909	P:axon guidance; P:oxidation reduction; P:phagocytosis, engulfment; P:GMP biosynthetic process; F:IMP dehydrogenase activity; P:purine base metabolic process; C:mitochondrial inner membrane peptidase complex
ESTAGB1WB004913	F:acyl carrier activity; P:cellular metabolic process; P:lipid biosynthetic process; F:cofactor binding; F:phosphopantetheine binding; P:transport; P:acyl-carrier-protein biosynthetic process
ESTAGB1WB004914	C:mitochondrion; P:metabolic process; F:catalytic activity; F:lyase activity
ESTAGB1WB004915	P:Ras protein signal transduction; P:compound eye photoreceptor cell differentiation; P:oocyte microtubule cytoskeleton polarization; P:olfactory learning; P:cell proliferation; C:cytoplasm; C:germline ring canal; F:protein domain specific binding; F:protein kinase C inhibitor activity; P:chromosome segregation; P:mitotic cell cycle, embryonic; F:tryptophan hydroxylase activator activity; C:nucle…
ESTAGB1WB004927	P:maternal specification of dorsal/ventral axis, oocyte, germ-line encoded; P:transport; C:integral to membrane
ESTAGB1WB004928	F:ATP binding; F:ATPase activity; F:nucleotide binding; F:nucleoside-triphosphatase activity
ESTAGB1WB004929	C:cell part
ESTAGB1WB004931	C:intracellular part
ESTAGB1WB004934	F:molecular_function; C:cellular_component
ESTAGB1WB004943	F:structural constituent of ribosome; P:translation; C:mitochondrial large ribosomal subunit; C:ribosome
ESTAGB1WB004951	F:binding; C:mitochondrion; P:regulation of apoptosis; P:cellular homeostasis
ESTAGB1WB004956	P:regulation of DNA replication; C:membrane; P:ceramide metabolic process; C:protein phosphatase type 2A complex; P:protein complex assembly; F:antigen binding; P:response to organic substance; C:microtubule cytoskeleton; P:negative regulation of tyrosine phosphorylation of Stat3 protein; P:regulation of cell adhesion; C:cytosol; F:protein heterodimerization activity; P:regulation of Wnt receptor…
ESTAGB1WB004960	C:eukaryotic translation initiation factor 3 complex; F:RNA binding; F:protein binding; P:regulation of translational initiation; F:translation initiation factor activity; C:nucleus; C:cytosol; F:ribosome binding; C:ribosome
ESTAGB1WB004963	F:binding
ESTAGB1WB004973	F:phosphorus-oxygen lyase activity; P:cellular process
ESTAGB1WB004974	F:polydeoxyribonucleotide kinase activity; F:transition metal ion binding; P:mRNA 3'-end processing; F:ATP binding; P:RNA interference, siRNA loading onto RISC; F:ATP-dependent polyribonucleotide 5'-hydroxyl-kinase activity; P:nuclear mRNA splicing, via spliceosome; C:tRNA-intron endonuclease complex; P:RNA interference, targeting of mRNA for destruction; P:tRNA splicing, via endonucleolytic clea…
ESTAGB1WB004978	F:hydrogen ion transmembrane transporter activity; P:ATP synthesis coupled proton transport; C:mitochondrial proton-transporting ATP synthase complex, coupling factor F(o); P:proton transport; C:mitochondrial proton-transporting ATP synthase, central stalk; F:hydrogen-exporting ATPase activity, phosphorylative mechanism
ESTAGB1WB004984	F:molecular_function; F:binding; P:regulation of ARF protein signal transduction; F:protein binding; F:ARF guanyl-nucleotide exchange factor activity; C:cellular_component; C:intracellular
ESTAGB1WB004986	C:cytosol; C:proteasome regulatory particle, lid subcomplex; P:proteolysis; F:endopeptidase activity
ESTAGB1WB004991	C:membrane
ESTAGB1WB004992	F:protein binding
ESTAGB1WB004997	F:molecular_function; C:cellular_component
ESTAGB1WB005000	C:mitochondrial respiratory chain complex I; P:mitochondrial electron transport, NADH to ubiquinone; F:NADH dehydrogenase activity
ESTAGB1WB005003	P:signal transduction; C:intracellular
ESTAGB1WB005006	F:GTP binding; C:plasma membrane; F:protein binding; P:small GTPase mediated signal transduction; F:GTPase activity; P:protein transport
ESTAGB1WB005018	F:identical protein binding; P:positive regulation of Wnt receptor signaling pathway; P:I-kappaB kinase/NF-kappaB cascade; F:protein kinase regulator activity; F:protein domain specific binding; C:protein kinase CK2 complex; F:protein serine/threonine kinase activity; P:regulation of protein kinase activity; P:serine family amino acid metabolic process
ESTAGB1WB005020	P:protein folding; C:cytoplasm; F:ATP binding; P:response to stress; F:protein binding
ESTAGB1WB005021	C:cytosol; F:phosphopantetheine binding; P:fatty acid biosynthetic process; F:enoyl-[acyl-carrier-protein] reductase (NADPH, B-specific) activity; F:zinc ion binding; P:oxidation reduction; F:acyl carrier activity; F:[acyl-carrier-protein] S-malonyltransferase activity; F:oleoyl-[acyl-carrier-protein] hydrolase activity; C:melanosome; F:3-hydroxypalmitoyl-[acyl-carrier-protein] dehydratase activi…
ESTAGB1WB005025	P:cellular macromolecule metabolic process; P:biopolymer catabolic process; C:endoplasmic reticulum
ESTAGB1WB005026	F:transporter activity; C:intracellular; P:transport
ESTAGB1WB005027	C:membrane
ESTAGB1WB005030	P:protein folding; C:chaperonin-containing T-complex; C:lipid particle; P:mitotic spindle organization; F:ATP binding; F:unfolded protein binding
ESTAGB1WB005034	C:intracellular part
ESTAGB1WB005035	P:oocyte fate determination; P:regulation of meiosis
ESTAGB1WB005036	F:peptidase activity; P:signal peptide processing; C:integral to membrane; C:signal peptidase complex
ESTAGB1WB005037	F:transporter activity; C:intracellular; P:transport
ESTAGB1WB005038	F:hydrolase activity, acting on glycosyl bonds
ESTAGB1WB005039	F:antioxidant activity; P:removal of superoxide radicals; C:mitochondrial matrix; F:superoxide dismutase activity; P:determination of adult life span
ESTAGB1WB005040	P:microtubule-based process; C:microtubule
ESTAGB1WB005041	F:nucleic acid binding
ESTAGB1WB005043	F:translation release factor activity; F:transferase activity; C:ribosome; ; P:regulation of translational termination; C:translation release factor complex
ESTAGB1WB005044	F:DNA-directed RNA polymerase activity; C:DNA-directed RNA polymerase II, core complex; F:DNA binding; P:transcription from RNA polymerase II promoter; C:nucleolus; P:purine base metabolic process; P:pyrimidine base metabolic process
ESTAGB1WB005054	F:RNA binding; P:cystoblast division; P:regulation of cell cycle; P:regulation of alternative nuclear mRNA splicing, via spliceosome; P:mRNA splice site selection; C:nucleus
ESTAGB1WB005060	C:cytoplasm
ESTAGB1WB005061	F:transferase activity; P:phosphorylation; P:isoprenoid biosynthetic process; F:nucleotide binding; C:cytoplasm; F:ATP binding; F:kinase activity; P:metabolic process; F:phosphotransferase activity, alcohol group as acceptor; F:mevalonate kinase activity
ESTAGB1WB005064	F:acetyl-CoA carboxylase activity; P:tissue homeostasis; C:soluble fraction; P:acetyl-CoA metabolic process; F:biotin binding; F:ATP binding; F:protein binding; P:response to organic cyclic substance; P:response to drug; P:lipid homeostasis; C:lipid particle; P:multicellular organismal protein metabolic process; P:pyruvate metabolic process; P:fatty acid biosynthetic process; C:acetyl-CoA carboxy…
ESTAGB1WB005067	P:carbohydrate metabolic process; F:phosphotransferase activity, alcohol group as acceptor; F:kinase activity; F:nucleotide binding
ESTAGB1WB005069	P:imaginal disc development; F:hydrolase activity, hydrolyzing O-glycosyl compounds; P:chitin catabolic process; C:extracellular region
ESTAGB1WB005074	F:binding
ESTAGB1WB005079	F:structural constituent of ribosome; C:mitochondrial large ribosomal subunit; C:ribosome
ESTAGB1WB005081	F:metallopeptidase activity; P:proteolysis; F:zinc ion binding
ESTAGB1WB005088	F:zinc ion binding; P:oxidation reduction; F:L-iditol 2-dehydrogenase activity; P:fructose metabolic process; P:mannose metabolic process
ESTAGB1WB005098	C:integral to membrane
ESTAGB1WB005103	P:phosphate metabolic process; C:cytoplasm; F:inorganic diphosphatase activity
ESTAGB1WB005106	C:mitochondrion
ESTAGB1WB005107	P:smooth muscle cell proliferation; C:cytoplasm; F:protein binding
ESTAGB1WB005118	F:zinc ion binding; C:intracellular
ESTAGB1WB005120	C:mitochondrial oxoglutarate dehydrogenase complex; C:mitochondrial membrane; P:tricarboxylic acid cycle; P:glycolysis; F:oxoglutarate dehydrogenase (succinyl-transferring) activity; F:thiamin pyrophosphate binding; P:lysine catabolic process; P:tryptophan metabolic process
ESTAGB1WB005126	F:metal ion binding
ESTAGB1WB005127	P:small GTPase mediated signal transduction; P:regulation of transcription, DNA-dependent; P:nucleocytoplasmic transport; F:ATP binding; F:GTPase activity; F:transcription factor binding; P:intracellular protein transport; F:GTP binding; C:transcription factor complex
ESTAGB1WB005132	C:cell part; F:transferase activity
ESTAGB1WB005134	P:anatomical structure morphogenesis; C:membrane; C:intracellular membrane-bounded organelle; P:cell surface receptor linked signal transduction; P:organ development; P:endocytosis; F:binding; P:metabolic process
ESTAGB1WB005143	P:ossification; P:skeletal system development; P:multicellular organismal development; C:proteinaceous extracellular matrix; C:extracellular region; F:collagen binding; F:extracellular matrix structural constituent; F:calcium ion binding; P:biomineral formation
ESTAGB1WB005155	C:eukaryotic translation initiation factor 3 complex; F:translation initiation factor activity; C:cytosol; C:ribosome; P:regulation of translational initiation
ESTAGB1WB005161	F:metalloendopeptidase activity; P:ovarian follicle cell stalk formation; P:proteolysis; F:zinc ion binding
ESTAGB1WB005162	F:fumarylacetoacetase activity; F:metal ion binding; P:tyrosine catabolic process; C:cytosol; P:styrene catabolic process
ESTAGB1WB005166	P:biosynthetic process; F:transferase activity; F:transferase activity, transferring glycosyl groups
ESTAGB1WB005169	F:transferase activity
ESTAGB1WB005170	C:Golgi apparatus
ESTAGB1WB005172	F:zinc ion binding; F:DNA binding
ESTAGB1WB005175	F:hydrolase activity; C:cellular_component
ESTAGB1WB005176	P:apoptosis; F:protein binding; C:intracellular
ESTAGB1WB005178	P:fatty acid biosynthetic process; F:metal ion binding; P:pyruvate metabolic process; C:mitochondrial inner membrane; C:lipid particle; P:mitotic spindle organization; F:acetyl-CoA C-acetyltransferase activity; P:isoleucine catabolic process; P:leucine catabolic process; P:lysine catabolic process; P:tryptophan metabolic process; P:valine catabolic process; P:benzoate metabolic process; P:acyl-ca…
ESTAGB1WB005180	P:axon ensheathment; P:axon extension; C:lateral plasma membrane; P:regulation of tube size, open tracheal system; P:establishment of endothelial blood-brain barrier; F:calcium ion binding; P:mushroom body development; P:septate junction assembly; P:synapse organization; P:nerve maturation; P:neuron adhesion; C:pleated septate junction; P:imaginal disc morphogenesis; P:dendrite morphogenesis; P:e…
ESTAGB1WB005188	F:binding; P:primary metabolic process; F:catalytic activity
ESTAGB1WB005192	C:membrane; F:nucleoside transmembrane transporter activity; P:transport
ESTAGB1WB005200	F:ATPase activator activity; C:cytoplasm; P:response to stress; F:chaperone binding
ESTAGB1WB005206	F:identical protein binding; C:integral to peroxisomal membrane; P:peroxisomal membrane transport; F:ATPase activity, coupled to transmembrane movement of substances; P:peroxisome organization; F:nucleotide binding
ESTAGB1WB005208	P:terminal branching, open tracheal system
ESTAGB1WB005221	C:mitochondrial proton-transporting ATP synthase complex, coupling factor F(o); C:lipid particle; P:proton transport
ESTAGB1WB005231	F:metal ion binding; P:negative regulation of apoptosis
ESTAGB1WB005238	F:methyltransferase activity; F:trans-aconitate 2-methyltransferase activity; F:transferase activity; P:metabolic process
ESTAGB1WB005242	C:clathrin coat of coated pit; P:synaptic vesicle coating; C:clathrin coat of synaptic vesicle; C:clathrin coat of trans-Golgi network vesicle; P:neurotransmitter secretion; F:protein binding; P:intracellular protein transport; F:structural molecule activity; C:lipid particle; P:dsRNA transport
ESTAGB1WB005243	F:molecular_function; F:binding; P:biological_process; C:cellular_component
ESTAGB1WB005245	P:nuclear envelope organization; P:organ morphogenesis; C:nuclear envelope
ESTAGB1WB005246	P:neurotransmitter secretion
ESTAGB1WB005247	F:molecular_function; F:binding; P:biological_process; F:protein binding; C:cellular_component
ESTAGB1WB005249	C:mitochondrion; P:protein complex assembly
ESTAGB1WB005256	F:pyridoxal phosphate binding; F:transaminase activity
ESTAGB1WB005258	C:ribosome; F:structural constituent of ribosome; C:lipid particle; F:zinc ion binding; P:translation; P:ribosome biogenesis
ESTAGB1WB005270	F:ATP binding; F:ATPase activity; C:integral to membrane; F:nucleotide binding; C:membrane; F:nucleoside-triphosphatase activity; P:transport
ESTAGB1WB005278	F:ATPase activity, coupled to transmembrane movement of substances; P:transport; F:ATP binding; C:integral to membrane
ESTAGB1WB005279	C:nuclear speck
ESTAGB1WB005281	P:protein transport
ESTAGB1WB005283	F:nucleic acid binding; C:DNA replication factor A complex; F:DNA binding
ESTAGB1WB005285	P:positive regulation of mitotic centrosome separation; P:mushroom body development; P:mitotic spindle stabilization; F:microtubule motor activity; P:mitochondrion distribution; P:cystoblast division; C:dynein complex; P:mitosis; P:centrosome localization; P:maintenance of RNA location; F:ATPase activity, coupled; P:microtubule-based movement; F:ATP binding; P:ovarian fusome organization; C:micro…
ESTAGB1WB005286	F:hydrolase activity, acting on acid anhydrides
ESTAGB1WB005287	C:mitochondrial small ribosomal subunit; F:structural constituent of ribosome; P:ribosome biogenesis
ESTAGB1WB005289	F:nucleic acid binding; F:translation initiation factor activity
ESTAGB1WB005305	F:nucleic acid binding; F:ATP binding; P:embryonic development via the syncytial blastoderm; F:ATP-dependent helicase activity
ESTAGB1WB005307	F:binding; F:zinc ion binding; F:DNA binding; C:intracellular
ESTAGB1WB005308	F:cation transmembrane transporter activity; C:membrane; P:cation transport
ESTAGB1WB005309	P:reproduction; P:growth; P:embryonic development ending in birth or egg hatching; P:nematode larval development; P:locomotion; P:gastrulation with mouth forming first
ESTAGB1WB005310	F:actin binding; C:cytoplasm
ESTAGB1WB005314	P:regulation of Rac GTPase activity; P:determination of adult life span; P:peptidyl-threonine phosphorylation; P:ruffle organization; P:response to insulin stimulus; P:regulation of protein kinase activity; P:protein amino acid autophosphorylation; F:phosphoprotein binding; C:TORC2 complex; P:positive regulation of stress fiber formation; F:protein self-association; P:gonad development; P:negativ…
ESTAGB1WB005315	C:mitochondrial inner membrane; F:ubiquinol-cytochrome-c reductase activity; P:electron transport chain; P:oxidative phosphorylation; P:proton transport;
ESTAGB1WB005316	P:mitochondrial electron transport, NADH to ubiquinone; C:mitochondrial respiratory chain complex I; F:NADH dehydrogenase activity; P:electron transport chain
ESTAGB1WB005317	P:regulation of transcription from RNA polymerase II promoter; F:protein complex scaffold; P:chromatin-mediated maintenance of transcription; C:SWI/SNF complex; F:transcription coactivator activity; C:transcription factor complex
ESTAGB1WB005319	F:actin binding; F:calcium-dependent phospholipid binding; F:calcium ion binding; P:wing disc dorsal/ventral pattern formation
ESTAGB1WB005327	F:binding
ESTAGB1WB005329	F:translation initiation factor activity; C:ribosome; P:regulation of translational initiation
ESTAGB1WB005346	F:zinc ion binding; F:protein binding; F:RNA binding
ESTAGB1WB005347	F:receptor activity; P:protein stabilization; F:enzyme regulator activity; C:extracellular region; F:protein binding
ESTAGB1WB005352	F:GTP binding; C:intracellular
ESTAGB1WB005360	F:acyltransferase activity; F:protein serine/threonine kinase activity; F:nucleotide binding; P:acyl-carrier-protein biosynthetic process; P:serine family amino acid metabolic process; P:phosphorylation
ESTAGB1WB005362	C:nucleus
ESTAGB1WB005363	F:microtubule motor activity; P:anterograde synaptic vesicle transport; P:neuromuscular junction development; C:microtubule; P:larval locomotory behavior; P:vesicle transport along microtubule; F:ATP binding; C:kinesin complex; C:cytoplasm
ESTAGB1WB005364	F:calcium ion binding
ESTAGB1WB005365	F:hydrolase activity
ESTAGB1WB005367	F:molecular_function; C:integral to membrane
ESTAGB1WB005368	F:biotin-protein ligase activity; C:polytene chromosome; P:response to heat; C:mitochondrion
ESTAGB1WB005374	P:cellular alcohol metabolic process; F:oxidoreductase activity, acting on CH-OH group of donors
ESTAGB1WB005376	F:hydrolase activity
ESTAGB1WB005378	F:protein binding
ESTAGB1WB005380	C:nucleolus; F:RNA binding; F:snoRNP binding; P:rRNA modification; F:pseudouridylate synthase activity; C:small nucleolar ribonucleoprotein complex; P:pyrimidine base metabolic process
ESTAGB1WB005381	C:COPI vesicle coat; C:cytosol; P:retrograde vesicle-mediated transport, Golgi to ER; P:intra-Golgi vesicle-mediated transport; C:clathrin adaptor complex; F:protein binding; P:COPI coating of Golgi vesicle; P:intracellular protein transport
ESTAGB1WB005385	F:mannose-6-phosphate isomerase activity; P:carbohydrate metabolic process; F:zinc ion binding; F:isomerase activity
ESTAGB1WB005387	P:synaptic vesicle endocytosis
ESTAGB1WB005393	P:axonogenesis
ESTAGB1WB005394	F:binding; F:RNA helicase activity; P:rRNA processing
ESTAGB1WB005395	C:integral to membrane
ESTAGB1WB005396	P:cytokinesis; C:intercellular bridge; P:small GTPase mediated signal transduction; P:regulation of transcription, DNA-dependent; C:coated pit; F:phosphatidylinositol-4,5-bisphosphate binding; P:phagocytosis, engulfment; C:melanosome; F:ATP binding; C:cell projection membrane; F:transcription factor binding; P:endosome transport; C:lipid particle; C:clathrin-coated endocytic vesicle; P:protein tr…
ESTAGB1WB005398	F:ferrochelatase activity; C:mitochondrial inner membrane; F:iron ion binding; P:protoporphyrinogen IX biosynthetic process; P:chlorophyll metabolic process
ESTAGB1WB005406	P:Golgi vesicle transport; C:cytoplasmic part; P:membrane organization
ESTAGB1WB005412	C:mitochondrion; P:pigmentation; F:molecular_function; C:nucleus; C:cellular_component
ESTAGB1WB005413	P:mitotic cell cycle; P:regulation of DNA replication initiation; P:DNA unwinding during replication; P:regulation of transcription; C:MCM complex; P:cell division; F:DNA binding; F:ATP binding; C:chromatin; F:ATPase activity; F:protein binding; P:negative regulation of apoptosis; F:chromatin binding
ESTAGB1WB005414	P:positive regulation of transcription from RNA polymerase II promoter; P:spermatogenesis; F:DNA binding; C:endoplasmic reticulum
ESTAGB1WB005415	P:microtubule-based movement; C:heterotrimeric G-protein complex; F:signal transducer activity; F:ATP binding; P:G-protein coupled receptor protein signaling pathway; C:kinesin complex; F:microtubule motor activity; C:microtubule
ESTAGB1WB005416	F:nucleotide binding; C:ribosome
ESTAGB1WB005419	C:eukaryotic translation initiation factor 3 complex; F:protein binding; F:translation initiation factor activity; C:cytosol; C:ribosome; P:regulation of translational initiation
ESTAGB1WB005421	C:integral to membrane
ESTAGB1WB005422	C:cytoplasm; F:endopeptidase activity; C:proteasome core complex
ESTAGB1WB005425	P:proteoglycan metabolic process; P:embryonic skeletal system morphogenesis; F:protein binding, bridging; P:ossification; P:detection of mechanical stimulus involved in sensory perception of sound; P:inner ear morphogenesis; P:ventricular cardiac muscle tissue morphogenesis; F:extracellular matrix binding; C:collagen type XI; P:visual perception; P:cell adhesion; P:collagen fibril organization; P…
ESTAGB1WB005429	C:extracellular region; F:chitin binding; F:hydrolase activity, acting on carbon-nitrogen (but not peptide) bonds; P:chitin metabolic process
ESTAGB1WB005438	F:catalytic activity
ESTAGB1WB005439	F:structural constituent of cuticle
ESTAGB1WB005440	P:protein folding; F:unfolded protein binding; F:heat shock protein binding
ESTAGB1WB005444	P:open tracheal system development; P:signal transduction; F:heparan sulfate 2-O-sulfotransferase activity
ESTAGB1WB005445	F:aminoacyl-tRNA ligase activity; P:tRNA aminoacylation for protein translation; F:nucleotide binding
ESTAGB1WB005447	F:arginine kinase activity; P:arginine metabolic process; P:proline metabolic process
ESTAGB1WB005449	F:5'-3' exonuclease activity; F:damaged DNA binding; F:double-stranded DNA binding; C:mitochondrion; F:manganese ion binding; P:double-strand break repair; P:UV protection; P:DNA replication, removal of RNA primer; F:5'-flap endonuclease activity; F:double-stranded DNA specific exodeoxyribonuclease activity; F:protein binding; F:magnesium ion binding; F:ribonuclease H activity; P:phosphoinositide…
ESTAGB1WB005454	F:specific transcriptional repressor activity; F:heparin binding; P:regulation of transforming growth factor beta receptor signaling pathway; P:zygotic determination of anterior/posterior axis, embryo; P:torso signaling pathway; C:extracellular region; P:negative regulation of transcription; C:transcriptional repressor complex
ESTAGB1WB005455	C:mitochondrial respiratory chain complex I; F:NADH dehydrogenase activity
ESTAGB1WB005456	F:RNA binding; P:RNA processing; F:3'-5'-exoribonuclease activity; P:regulation of RNA metabolic process
ESTAGB1WB005459	C:cytoplasmic part; P:cellular process
ESTAGB1WB005463	C:integral to membrane; F:structural molecule activity; C:membrane
ESTAGB1WB005464	F:transmembrane receptor activity; F:receptor activity; F:G-protein coupled receptor activity; C:integral to membrane; P:cell surface receptor linked signal transduction; C:membrane; P:G-protein coupled receptor protein signaling pathway
ESTAGB1WB005470	C:oligosaccharyltransferase complex; P:protein amino acid N-linked glycosylation via asparagine; C:microsome; F:protein binding; P:response to cytokine stimulus; P:T cell activation; P:protein amino acid terminal N-glycosylation; F:dolichyl-diphosphooligosaccharide-protein glycotransferase activity
ESTAGB1WB005473	F:transferase activity
ESTAGB1WB005474	F:DNA helicase activity; P:regulation of phosphorylation; P:DNA unwinding during replication; P:regulation of transcription; C:MCM complex; F:protein binding; F:nucleotide binding; F:single-stranded DNA binding; P:cell proliferation; C:cytoplasm; P:response to DNA damage stimulus
ESTAGB1WB005477	P:proteolysis; F:cysteine-type endopeptidase activity
ESTAGB1WB005479	F:hydrolase activity
ESTAGB1WB005486	P:mesoderm morphogenesis; P:gastrulation; F:protein binding; P:central nervous system development; P:heart development; P:vasculature development; F:protein kinase activity; P:odontogenesis; P:determination of bilateral symmetry; C:cytoplasm; P:tube development; P:dorsal/ventral pattern formation; P:anatomical structure formation involved in morphogenesis; C:integral to plasma membrane; P:BMP sig…
ESTAGB1WB005489	P:anaphase-promoting complex-dependent proteasomal ubiquitin-dependent protein catabolic process; P:positive regulation of ubiquitin-protein ligase activity during mitotic cell cycle; P:negative regulation of ubiquitin-protein ligase activity during mitotic cell cycle; C:dendrite; F:protein binding; C:proteasome regulatory particle; C:cytosol
ESTAGB1WB005500	F:catalytic activity
ESTAGB1WB005501	C:mitochondrial small ribosomal subunit; F:structural constituent of ribosome; P:translation; P:ribosome biogenesis
ESTAGB1WB005503	F:translation initiation factor activity; C:ribosome; P:regulation of translational initiation
ESTAGB1WB005509	F:heat shock protein binding
ESTAGB1WB005520	C:synapse; P:exocytosis; F:protein binding; P:regulation of muscle contraction; P:rhabdomere membrane biogenesis; C:cytoplasm; P:synaptic vesicle endocytosis; P:protein localization; C:plasma membrane
ESTAGB1WB005521	F:transcription regulator activity; P:regulation of transcription, DNA-dependent; F:transcription factor binding; C:transcription factor complex
ESTAGB1WB005524	C:intracellular; F:GTP binding; P:small GTPase mediated signal transduction
ESTAGB1WB005531	F:receptor activity; C:integral to membrane; P:signal transduction
ESTAGB1WB005534	C:exon-exon junction complex; F:RNA binding; C:spliceosome complex; P:regulation of translation; C:nuclear speck; P:oocyte microtubule cytoskeleton polarization; F:protein binding; P:nuclear mRNA splicing, via spliceosome; C:cytoplasm; P:protein localization; P:nuclear-transcribed mRNA catabolic process, nonsense-mediated decay; P:mRNA transport
ESTAGB1WB005537	P:regulation of cell shape; P:small GTPase mediated signal transduction; P:cell adhesion; P:protein amino acid ADP-ribosylation; P:neurotransmitter secretion; F:GTPase activity; P:endosome transport; P:synaptic vesicle endocytosis; P:protein transport; C:Golgi apparatus; F:GTP binding
ESTAGB1WB005539	C:intracellular; P:transport; F:transporter activity
ESTAGB1WB005542	P:endoplasmic reticulum organization; P:exocytosis; P:establishment of ER localization; P:oocyte growth; P:vitellogenesis; P:bristle morphogenesis; C:endoplasmic reticulum membrane
ESTAGB1WB005544	F:hydrolase activity; F:lyase activity; F:binding
ESTAGB1WB005546	F:nucleoside-triphosphatase activity; F:nucleotide binding
ESTAGB1WB005547	F:peptidyl-dipeptidase activity; F:binding; P:proteolysis; C:membrane; F:metallopeptidase activity
ESTAGB1WB005563	F:heme binding; F:receptor activity
ESTAGB1WB005568	F:oxidoreductase activity; F:calcium ion binding
ESTAGB1WB005569	P:regulation of cellular respiration; F:iron ion binding; C:mitochondrial outer membrane
ESTAGB1WB005578	F:binding; C:transcription elongation factor complex; F:positive transcription elongation factor activity; P:RNA elongation from RNA polymerase II promoter; F:RNA polymerase II transcription elongation factor activity; P:positive regulation of transcription
ESTAGB1WB005584	F:metal ion binding; P:modification-dependent protein catabolic process; C:intracellular; P:protein ubiquitination; F:ubiquitin-protein ligase activity; F:transferase activity
ESTAGB1WB005591	P:response to oxidative stress; F:transferase activity, transferring sulfur-containing groups; P:determination of adult life span; F:pyrimidodiazepine synthase activity; F:glutathione dehydrogenase (ascorbate) activity; P:glutathione metabolic process; P:electron transport chain; P:L-ascorbic acid metabolic process
ESTAGB1WB005593	P:cellular carbohydrate metabolic process; P:citrate metabolic process; C:lipid particle; F:ATP citrate synthase activity; F:heme binding; F:ATP binding; F:succinate-CoA ligase (ADP-forming) activity; F:oxygen binding; P:reductive tricarboxylic acid cycle; C:succinate-CoA ligase complex
ESTAGB1WB005598	P:mitotic spindle elongation; F:structural constituent of ribosome; C:lipid particle; C:cytosolic small ribosomal subunit; P:translation; P:ribosome biogenesis
ESTAGB1WB005604	C:methionine adenosyltransferase complex; P:S-adenosylmethionine biosynthetic process; F:protein binding; F:methionine adenosyltransferase regulator activity; F:catalytic activity; C:nucleus
ESTAGB1WB005605	C:integral to membrane
ESTAGB1WB005611	P:metabolic process; C:lipid particle; F:catalytic activity
ESTAGB1WB005613	P:cellular process; P:transport; P:positive regulation of growth rate; P:embryonic development ending in birth or egg hatching; C:integral to membrane; C:mitochondrial inner membrane; F:transmembrane transporter activity; P:reproduction; P:nematode larval development; F:protein binding; P:positive regulation of locomotion; C:lipid particle
ESTAGB1WB005623	P:response to hypoxia; P:insulin receptor signaling pathway; F:glucose transmembrane transporter activity; P:glucose transport; F:glucose binding; C:integral to plasma membrane
ESTAGB1WB005624	C:mitochondrial outer membrane; P:anion transport; F:voltage-gated anion channel activity; F:receptor activity
ESTAGB1WB005625	F:DNA-directed RNA polymerase activity; C:DNA-directed RNA polymerase II, core complex; F:DNA binding; F:protein dimerization activity; P:transcription from RNA polymerase II promoter; C:nucleolus; P:purine base metabolic process; P:pyrimidine base metabolic process
ESTAGB1WB005636	F:RNA binding; F:ATP binding; C:nucleus; F:ATP-dependent helicase activity
ESTAGB1WB005637	P:protein folding; F:endopeptidase activity; C:proteasome regulatory particle, base subcomplex; F:ATPase activity; F:protein binding; F:ATP binding; P:proteolysis; C:nucleus; C:cytosol
ESTAGB1WB005642	F:oxidoreductase activity, acting on CH-OH group of donors; P:cellular alcohol metabolic process; F:FAD binding
ESTAGB1WB005647	C:proteasome core complex; P:ubiquitin-dependent protein catabolic process; C:cytosol; F:threonine-type endopeptidase activity
ESTAGB1WB005650	P:protein folding; C:chaperonin-containing T-complex; C:lipid particle; P:mitotic spindle organization; F:ATP binding; F:unfolded protein binding
ESTAGB1WB005657	P:cell cycle; P:actin filament organization; P:regulation of cell shape; P:nucleocytoplasmic transport; F:sphingomyelin phosphodiesterase activity; C:nuclear microtubule; P:cell adhesion; F:protein binding; F:GTPase activity; P:signal transduction; P:intracellular protein transport; C:lipid particle; F:GTP binding; P:glycosphingolipid metabolic process
ESTAGB1WB005659	C:membrane
ESTAGB1WB005660	C:ribosome
ESTAGB1WB005661	F:binding; P:intracellular protein transport; C:mitochondrion
ESTAGB1WB005664	F:ligase activity; P:metabolic process
ESTAGB1WB005665	C:microsome; P:embryonic development; P:calcium ion homeostasis; F:protein binding; F:calcium ion binding; P:post-embryonic development; P:ER overload response; C:endoplasmic reticulum
ESTAGB1WB005670	F:chitin binding; P:chitin metabolic process; C:integral to membrane; C:membrane; C:extracellular region
ESTAGB1WB005672	F:binding
ESTAGB1WB005674	C:lipid particle; P:fatty acid metabolic process; F:hydro-lyase activity; C:mitochondrion
ESTAGB1WB005684	C:cytoplasm; F:adenine phosphoribosyltransferase activity; P:purine salvage; P:nucleoside metabolic process; P:purine base metabolic process
ESTAGB1WB005685	F:hydrolase activity
ESTAGB1WB005691	P:Golgi to endosome transport; C:cytosol; C:lysosome; C:nuclear envelope-endoplasmic reticulum network; P:small GTPase mediated signal transduction; C:Golgi stack; C:membrane fraction; C:late endosome; C:early endosome; P:neurotransmitter secretion; F:protein binding; C:rough endoplasmic reticulum; C:trans-Golgi network transport vesicle; F:GTPase activity; C:perinuclear region of cytoplasm; P:pr…
ESTAGB1WB005692	F:DNA binding; P:regulation of transcription; P:nucleotide-excision repair; C:nucleus
ESTAGB1WB005694	C:subapical complex; P:pole plasm protein localization; P:olfactory behavior; P:establishment or maintenance of epithelial cell apical/basal polarity; P:establishment or maintenance of polarity of larval imaginal disc epithelium; F:cytoskeletal protein binding; P:regulation of actin cytoskeleton organization; C:fusome; P:regulation of membrane potential in photoreceptor cell; P:determination of l…
ESTAGB1WB005700	F:molecular_function; P:biological_process; C:cellular_component; C:nucleus
ESTAGB1WB005706	P:negative regulation of transcription from RNA polymerase II promoter; P:wing disc dorsal/ventral pattern formation; F:zinc ion binding; P:imaginal disc-derived wing vein morphogenesis; P:transforming growth factor beta receptor signaling pathway; P:olfactory learning; P:compound eye morphogenesis; P:midgut development; P:negative regulation of cell proliferation; P:dorsal closure; F:RNA polymer…
ESTAGB1WB005714	F:protein binding
ESTAGB1WB005715	F:signal transducer activity; P:small GTPase mediated signal transduction; C:intracellular; P:protein amino acid ADP-ribosylation; P:neurotransmitter secretion; F:GTPase activity; F:NAD(P)+-protein-arginine ADP-ribosyltransferase activity; P:endosome transport; P:synaptic vesicle endocytosis; P:protein transport; F:GTP binding
ESTAGB1WB005717	P:positive regulation of transcription from RNA polymerase II promoter; F:DNA binding; F:RNA polymerase II transcription mediator activity; C:Srb-mediator complex; F:transcription coactivator activity; C:transcription factor complex
ESTAGB1WB005719	F:protein kinase activity; F:ATP binding; P:apoptosis
ESTAGB1WB005730	C:intracellular; F:binding
ESTAGB1WB005731	F:sodium ion binding; P:amino acid transport; C:integral to membrane; P:sodium ion transport; C:membrane; P:transport
ESTAGB1WB005734	P:protein amino acid phosphorylation; F:RNA polymerase II carboxy-terminal domain kinase activity; F:ATP binding; F:cyclin-dependent protein kinase activity; P:serine family amino acid metabolic process;
ESTAGB1WB005735	C:membrane; P:steroid biosynthetic process; F:oxidoreductase activity; F:iron ion binding; F:electron carrier activity; P:electron transport chain
ESTAGB1WB005736	P:spermatogenesis; C:intracellular membrane-bounded organelle; C:cytoplasmic part; C:integral to membrane
ESTAGB1WB005740	P:proteolysis; F:metallopeptidase activity; F:aminopeptidase activity; F:hydrolase activity; F:zinc ion binding
ESTAGB1WB005744	F:hydrolase activity
ESTAGB1WB005746	F:electron carrier activity; F:FAD binding; P:electron transport chain
ESTAGB1WB005750	C:mitochondrial outer membrane; P:anion transport; F:voltage-gated anion channel activity; F:receptor activity
ESTAGB1WB005754	C:cytoplasm; C:nucleolus; P:RNA processing
ESTAGB1WB005755	F:cytochrome-b5 reductase activity; P:nematode larval development; F:electron carrier activity; P:positive regulation of growth rate; P:oxidation reduction; P:embryonic development ending in birth or egg hatching; C:integral to membrane; P:sterol biosynthetic process; P:amino sugar metabolic process; P:electron transport chain
ESTAGB1WB005768	C:paraspeckles; F:RNA binding; F:protein binding; C:mRNA cleavage factor complex; F:hydrolase activity; C:centrosome; P:nuclear mRNA splicing, via spliceosome
ESTAGB1WB005769	P:pancreatic juice secretion; C:COPI vesicle coat; C:cytosol; C:soluble fraction; F:calcium ion binding; P:protein folding; P:retrograde vesicle-mediated transport, Golgi to ER; C:extracellular space; C:microsome; P:COPI coating of Golgi vesicle; F:unfolded protein binding; P:intracellular protein transport; F:structural molecule activity; F:hormone activity; C:endoplasmic reticulum; P:signal tra…
ESTAGB1WB005785	P:R8 cell differentiation; P:imaginal disc-derived wing vein morphogenesis; P:wing cell fate specification; P:rhabdomere development; P:cell proliferation; P:epidermal growth factor receptor signaling pathway; P:negative regulation of neuron apoptosis; P:compound eye cone cell differentiation; P:imaginal disc-derived wing vein specification; P:nuclear translocation of MAPK; C:perinuclear region o…
ESTAGB1WB005800	P:purine ribonucleoside salvage; F:copper ion binding; P:response to cadmium ion; C:plasma membrane; C:chloroplast; F:adenosine kinase activity; C:apoplast; C:mitochondrion; P:purine base metabolic process
ESTAGB1WB005803	C:transcription elongation factor complex
ESTAGB1WB005811	F:unfolded protein binding; P:protein folding; F:heat shock protein binding
ESTAGB1WB005814	P:Ras protein signal transduction; F:protein kinase activity; P:metamorphosis; P:spermatogenesis; P:response to bacterium; P:torso signaling pathway; P:terminal region determination; P:ovarian follicle cell development; C:cytoplasm; C:extrinsic to plasma membrane
ESTAGB1WB005817	P:regulation of transcription
ESTAGB1WB005820	F:transferase activity, transferring glycosyl groups
ESTAGB1WB005823	P:response to hypoxia; P:heme biosynthetic process; F:glycine binding; C:mitochondrial inner membrane; F:5-aminolevulinate synthase activity; P:oxygen homeostasis; P:cellular iron ion homeostasis; P:erythrocyte differentiation; F:protein binding; P:hemoglobin biosynthetic process; F:coenzyme binding; P:glycine metabolic process; P:L-serine metabolic process; P:threonine metabolic process; P:acyl-…
ESTAGB1WB005824	F:receptor activity; C:plasma membrane; C:membrane part; C:synapse; F:ion channel activity; P:signal transduction; P:ion transport
ESTAGB1WB005830	C:small ribosomal subunit
ESTAGB1WB005831	F:hydrolase activity, acting on ester bonds; C:cytoplasmic vesicle
ESTAGB1WB005840	F:sulfate adenylyltransferase (ATP) activity; P:blood coagulation; F:protein binding; F:ATP binding; P:sulfate assimilation; F:adenylylsulfate kinase activity; P:bone development; P:purine base metabolic process
ESTAGB1WB005841	C:mitochondrial envelope; C:membrane
ESTAGB1WB005846	P:nucleotide-excision repair, DNA damage removal; P:cell cycle checkpoint; F:damaged DNA binding; F:protein binding; C:nucleoplasm; C:cytoplasm; P:protein ubiquitination during ubiquitin-dependent protein catabolic process
ESTAGB1WB005847	C:cytoplasm; P:translation
ESTAGB1WB005855	F:molecular_function; P:biological_process; C:extracellular region; C:cellular_component
ESTAGB1WB005863	P:response to inorganic substance; C:cytosol; P:purine nucleotide biosynthetic process; F:metal ion binding; F:phosphoribosylamine-glycine ligase activity; F:protein binding; P:organ development; F:nucleotide binding; F:phosphoribosylformylglycinamidine cyclo-ligase activity; F:phosphoribosylglycinamide formyltransferase activity; P:response to organic substance; P:purine base metabolic process; …
ESTAGB1WB005864	C:cytoplasm; P:modification-dependent protein catabolic process; P:protein modification process; F:acid-amino acid ligase activity; F:protein binding
ESTAGB1WB005870	F:peptidase activity
ESTAGB1WB005872	F:transferase activity
ESTAGB1WB005873	F:binding
ESTAGB1WB005874	F:binding
ESTAGB1WB005877	P:oocyte fate determination; P:regulation of meiosis; C:cellular_component
ESTAGB1WB005878	P:muscle organ development; F:RNA polymerase II transcription mediator activity; P:dendrite morphogenesis; F:receptor activity; F:nucleotide binding; P:transcription; P:regulation of transcription; C:nucleus
ESTAGB1WB005879	P:oxidation reduction; F:NAD(P)H oxidase activity; F:calcium ion binding
ESTAGB1WB005893	F:methylmalonate-semialdehyde dehydrogenase (acylating) activity; F:malonate-semialdehyde dehydrogenase (acetylating) activity; P:oxidation reduction; P:thymine metabolic process; P:brown fat cell differentiation; C:mitochondrion; P:inositol metabolic process; P:isoleucine catabolic process; P:leucine catabolic process; P:valine catabolic process; P:alanine metabolic process; P:aspartate metaboli…
ESTAGB1WB005899	F:structural constituent of ribosome; F:RNA binding; P:translation; C:mitochondrial large ribosomal subunit; P:RNA processing; F:3'-5'-exoribonuclease activity; C:ribosome
ESTAGB1WB005902	P:neuropeptide signaling pathway; C:extracellular region
ESTAGB1WB005907	F:protein binding
ESTAGB1WB005908	C:cytosol; P:negative regulation of ubiquitin-protein ligase activity during mitotic cell cycle; F:endopeptidase activity; C:proteasome regulatory particle; P:anaphase-promoting complex-dependent proteasomal ubiquitin-dependent protein catabolic process; F:ATP binding; F:ATPase activity; P:positive regulation of ubiquitin-protein ligase activity during mitotic cell cycle; F:protein binding; P:int…
ESTAGB1WB005913	F:translation initiation factor activity; C:nucleolus; P:protein deneddylation; C:signalosome; C:eukaryotic translation initiation factor 3 complex; F:metallopeptidase activity; F:transcription coactivator activity; P:transcription from RNA polymerase II promoter; C:ribosome; P:regulation of translational initiation; C:transcription factor complex; P:positive regulation of transcription
ESTAGB1WB005914	F:thiamin pyrophosphate binding; F:lyase activity; F:magnesium ion binding
ESTAGB1WB005921	C:microsome; F:monooxygenase activity; C:cytosol; C:mitochondrion
ESTAGB1WB005922	F:oxidoreductase activity
ESTAGB1WB005932	C:nucleus; F:zinc ion binding
ESTAGB1WB005939	F:nucleoside-triphosphatase activity; F:nucleotide binding
ESTAGB1WB005941	F:oxidoreductase activity; F:binding
ESTAGB1WB005949	P:karyosome formation; P:sister chromatid cohesion; F:binding
ESTAGB1WB005950	F:protein binding
ESTAGB1WB005951	F:aminoacyl-tRNA ligase activity; F:binding; P:tRNA aminoacylation for protein translation
ESTAGB1WB005952	P:protein folding; C:lipid particle; P:response to stress; F:ATP binding; F:unfolded protein binding; C:endoplasmic reticulum
ESTAGB1WB005958	C:ribosome; F:structural constituent of ribosome; F:RNA binding; P:translation; P:ribosome biogenesis
ESTAGB1WB005961	F:Ran GTPase binding; C:nucleus
ESTAGB1WB005966	P:positive regulation of growth rate; F:RNA binding; P:oviposition; P:embryonic development ending in birth or egg hatching; P:negative regulation of vulval development; P:gonad development
ESTAGB1WB005975	F:transferase activity; P:isoprenoid biosynthetic process
ESTAGB1WB005980	C:cytoplasm; F:nucleic acid binding; F:lysine-tRNA ligase activity; P:lysyl-tRNA aminoacylation; F:ATP binding; P:lysine biosynthetic process
ESTAGB1WB005992	F:mRNA binding; C:mRNA cap binding complex; P:regulation of translation; F:single-stranded RNA binding; C:chromatoid body; P:spermatid development; F:piRNA binding; P:gene silencing by RNA; F:protein binding; C:P granule; P:piRNA metabolic process; C:polysome; P:anatomical structure morphogenesis
ESTAGB1WB006002	C:chromatin; P:determination of adult life span; F:histone deacetylase activity; F:protein binding; P:dendrite morphogenesis; P:histone methylation; P:histone deacetylation; C:ESC/E(Z) complex; P:muscle organ development; P:chromatin silencing; P:blastoderm segmentation; C:Myb complex; C:histone deacetylase complex
ESTAGB1WB006006	C:nucleoplasm; C:cytoplasm; C:nucleus; C:nucleolus; P:transport; P:protein transport
ESTAGB1WB006007	C:cytoplasmic part
ESTAGB1WB006010	P:phagocytosis, engulfment; C:intracellular; F:GTP binding
ESTAGB1WB006016	P:regulation of transcription, DNA-dependent; P:muscle organ development; C:polytene chromosome; P:regulation of histone acetylation; F:histone acetyltransferase activity; P:dendrite morphogenesis; C:H4/H2A histone acetyltransferase complex; P:acyl-carrier-protein biosynthetic process
ESTAGB1WB006017	P:nuclear pore organization; P:transport; P:attachment of spindle microtubules to kinetochore during mitosis; P:mitotic metaphase plate congression; C:kinetochore; C:Nup107-160 complex
ESTAGB1WB006023	C:cytoplasm; F:serine-type endopeptidase activity; F:ATP binding; P:proteolysis
ESTAGB1WB006029	F:nucleic acid binding; C:intracellular; F:exonuclease activity
ESTAGB1WB006033	C:cytoplasm; P:mitochondrial outer membrane translocase complex assembly; P:cellular chaperone-mediated protein complex assembly; P:response to unfolded protein; F:ATP binding; C:nucleus; P:response to heat
ESTAGB1WB006037	C:ribosome
ESTAGB1WB006044	C:integral to membrane
ESTAGB1WB006051	F:receptor activity; C:integral to membrane; C:endoplasmic reticulum; P:intracellular protein transport
ESTAGB1WB006052	C:sarcoplasmic reticulum; F:calcium-transporting ATPase activity; P:neuromuscular synaptic transmission; P:regulation of sequestering of calcium ion; C:integral to membrane; P:ATP biosynthetic process; F:ATP binding; F:protein binding; P:calcium ion transport; C:nuclear envelope; C:lipid particle; C:endoplasmic reticulum membrane
ESTAGB1WB006054	F:transferase activity
ESTAGB1WB006055	F:calcium ion binding
ESTAGB1WB006062	P:transcription; P:regulation of transcription; P:regulation of growth; C:nucleus
ESTAGB1WB006066	P:protein transport
ESTAGB1WB006068	F:catalytic activity
ESTAGB1WB006069	P:cellular process
ESTAGB1WB006070	C:cytoplasm; F:arginine-tRNA ligase activity; P:arginyl-tRNA aminoacylation; F:ATP binding; P:arginine metabolic process; P:proline metabolic process
ESTAGB1WB006074	C:mitochondrial inner membrane; C:respiratory chain
ESTAGB1WB006082	P:estrogen metabolic process; P:oxidation reduction; C:membrane fraction; F:estradiol 17-beta-dehydrogenase activity; F:transcription factor binding; P:steroid biosynthetic process; F:nuclear hormone receptor binding; C:mitochondrial envelope; P:androgen metabolic process; C:plasma membrane; F:testosterone 17-beta-dehydrogenase activity; C:transcription factor complex; P:signal transduction
ESTAGB1WB006087	F:ATP binding; F:nucleotide binding; F:ATPase activity, coupled; F:motor activity; C:myosin complex; F:protein binding
ESTAGB1WB006089	F:diazepam binding; P:cellular acyl-CoA homeostasis; F:enzyme inhibitor activity; F:acyl-CoA binding
ESTAGB1WB006099	F:oxidoreductase activity; P:lipid biosynthetic process
ESTAGB1WB006100	P:transport
ESTAGB1WB006104	F:histone acetyltransferase activity; P:signal transduction; C:histone acetyltransferase complex; P:acyl-carrier-protein biosynthetic process
ESTAGB1WB006113	F:structural constituent of ribosome; C:mitochondrial small ribosomal subunit
ESTAGB1WB006116	C:septate junction; P:homophilic cell adhesion; P:morphogenesis of embryonic epithelium; C:extrinsic to membrane; P:regulation of tube size, open tracheal system; P:maintenance of epithelial integrity, open tracheal system
ESTAGB1WB006120	P:traversing start control point of mitotic cell cycle; F:p53 binding; P:protein ubiquitination during ubiquitin-dependent protein catabolic process; C:nucleoplasm; P:negative regulation of transcription from RNA polymerase II promoter; F:zinc ion binding; P:protein complex assembly; C:insoluble fraction; C:nucleolus; C:cytosol; P:positive regulation of proteasomal ubiquitin-dependent protein cat…
ESTAGB1WB006125	F:RNA binding
ESTAGB1WB006156	F:hydrolase activity, hydrolyzing O-glycosyl compounds; P:carbohydrate metabolic process
ESTAGB1WB006161	F:nucleic acid binding; F:mRNA binding; F:nucleotide binding
ESTAGB1WB006169	P:mitochondrial electron transport, NADH to ubiquinone; C:mitochondrial respiratory chain complex I; F:NADH dehydrogenase activity; P:electron transport chain
ESTAGB1WB006173	F:nucleic acid binding; F:nucleotide binding; C:ribonucleoprotein complex
ESTAGB1WB006181	P:mitochondrial electron transport, NADH to ubiquinone; F:NADH dehydrogenase (ubiquinone) activity; C:mitochondrial respiratory chain complex I; P:ubiquinone biosynthetic process; P:sodium ion transport; P:proton transport
ESTAGB1WB006182	C:cell part
ESTAGB1WB006188	F:DNA binding; C:nucleus
ESTAGB1WB006190	F:metal ion binding; P:superoxide metabolic process
ESTAGB1WB006194	C:mitochondrial small ribosomal subunit; F:structural constituent of ribosome; P:translation; P:ribosome biogenesis
ESTAGB1WB006197	C:cytosol; F:purine ribonucleotide binding; P:negative regulation of transcription; C:nucleus; C:plasma membrane
ESTAGB1WB006199	C:small nucleolar ribonucleoprotein complex; F:protein binding; P:ribosome biogenesis; P:pseudouridine synthesis; C:nuclear lumen
ESTAGB1WB006200	P:translation; F:dihydrolipoyllysine-residue acetyltransferase activity; P:detection of light stimulus; P:acetyl-CoA biosynthetic process from pyruvate; F:pyruvate dehydrogenase activity; F:nucleotide binding; C:mitochondrial pyruvate dehydrogenase complex; P:gluconeogenesis; P:glycolysis; P:acyl-carrier-protein biosynthetic process
ESTAGB1WB006204	P:protein amino acid phosphorylation; P:Wnt receptor signaling pathway; C:plasma membrane; F:ATP binding; F:protein serine/threonine kinase activity; P:glial cell migration; P:serine family amino acid metabolic process
ESTAGB1WB006227	C:cytoplasm; P:metabolic process; F:3-chloroallyl aldehyde dehydrogenase activity
ESTAGB1WB006233	P:cell cycle; P:cell division; P:mitosis; C:nucleus
ESTAGB1WB006239	F:protein binding; C:signalosome
ESTAGB1WB006240	P:organelle organization
ESTAGB1WB006241	C:ribonucleoprotein complex
ESTAGB1WB006246	F:hydrolase activity, acting on acid anhydrides, in phosphorus-containing anhydrides; P:regulation of alternative nuclear mRNA splicing, via spliceosome; C:nucleus
ESTAGB1WB006248	F:hydrogen ion transmembrane transporter activity; C:mitochondrial proton-transporting ATP synthase complex, coupling factor F(o); P:ATP synthesis coupled proton transport; C:lipid particle
ESTAGB1WB006251	P:intracellular protein transport; C:mitochondrial inner membrane presequence translocase complex; C:mitochondrial inner membrane; F:P-P-bond-hydrolysis-driven protein transmembrane transporter activity; F:protein transporter activity; P:protein transport
ESTAGB1WB006252	P:protein transport
ESTAGB1WB006254	C:cytoplasm; F:protein binding; C:signalosome
ESTAGB1WB006269	F:methylmalonate-semialdehyde dehydrogenase (acylating) activity; F:malonate-semialdehyde dehydrogenase (acetylating) activity; F:acyl-CoA binding; P:thymine metabolic process; C:mitochondrion; P:inositol metabolic process; P:isoleucine catabolic process; P:leucine catabolic process; P:valine catabolic process; P:alanine metabolic process; P:aspartate metabolic process; P:3-chloroacrylic acid met…
ESTAGB1WB006275	P:cellular carbohydrate metabolic process; P:citrate metabolic process; C:lipid particle; F:ATP citrate synthase activity; F:ATP binding; F:succinate-CoA ligase (ADP-forming) activity; P:reductive tricarboxylic acid cycle; C:succinate-CoA ligase complex
ESTAGB1WB006279	F:protein binding
ESTAGB1WB006284	C:cytosol; C:TORC2 complex; P:regulation of Rac GTPase activity; F:protein binding; P:positive regulation of TOR signaling pathway; P:positive regulation of peptidyl-tyrosine phosphorylation; C:TORC1 complex; P:positive regulation of actin filament polymerization
ESTAGB1WB006293	P:cellular process; P:lipid metabolic process; F:endopeptidase activity; F:serine-type peptidase activity; C:intracellular organelle part; C:Golgi apparatus
ESTAGB1WB006299	F:phosphoprotein phosphatase activity; P:protein amino acid dephosphorylation
ESTAGB1WB006313	F:calcium channel activity; P:calcium ion transport
ESTAGB1WB006323	C:intracellular; P:transport; F:transporter activity
ESTAGB1WB006326	C:cytoplasm; P:oxidation reduction; F:iron ion binding; P:inositol catabolic process; F:inositol oxygenase activity
ESTAGB1WB006328	P:compound eye development; P:negative regulation of JNK cascade; P:negative regulation of programmed cell death; P:negative regulation of Wnt receptor signaling pathway; P:eye-antennal disc development
ESTAGB1WB006329	F:5-aminolevulinate synthase activity; F:pyridoxal phosphate binding; P:heme biosynthetic process; C:mitochondrial matrix; F:transferase activity, transferring nitrogenous groups; P:glycine metabolic process; P:L-serine metabolic process; P:threonine metabolic process; P:acyl-carrier-protein biosynthetic process
ESTAGB1WB006337	C:protein complex; C:intracellular part
ESTAGB1WB006339	F:binding
ESTAGB1WB006341	F:transferase activity; F:protein binding
ESTAGB1WB006344	P:methylation; F:transferase activity
ESTAGB1WB006356	F:phosphoprotein phosphatase activity; P:mRNA processing; F:nucleotidyltransferase activity; P:protein amino acid dephosphorylation
ESTAGB1WB006357	F:molecular_function; C:cellular_component
ESTAGB1WB006359	F:acyltransferase activity; C:lipid particle; P:fatty acid beta-oxidation; C:mitochondrion; P:acyl-carrier-protein biosynthetic process
ESTAGB1WB006364	C:mitochondrial large ribosomal subunit; F:structural constituent of ribosome; P:ribosome biogenesis
ESTAGB1WB006366	F:oxidoreductase activity
ESTAGB1WB006374	P:chromosome segregation; F:GTP binding; F:beta-tubulin binding; C:midbody; C:late endosome membrane; C:lysosomal membrane; F:alpha-tubulin binding; C:spindle midzone; P:small GTPase mediated signal transduction; F:GDP binding; F:GTPase activity; C:tubulin complex
ESTAGB1WB006380	F:peptidase activity, acting on L-amino acid peptides
ESTAGB1WB006386	F:N-acetyltransferase activity; F:hyalurononglucosaminidase activity; P:acyl-carrier-protein biosynthetic process; P:carbohydrate metabolic process
ESTAGB1WB006387	P:acetyl-CoA metabolic process; C:lipid particle; F:transferase activity
ESTAGB1WB006390	C:lipid particle; C:RNA-induced silencing complex
ESTAGB1WB006391	C:intracellular
ESTAGB1WB006392	P:axon guidance; P:locomotor rhythm; P:behavioral response to cocaine; P:behavioral response to ethanol; F:protein binding; C:cytoplasm
ESTAGB1WB006402	P:regulation of transcription; F:DNA binding; F:protein binding; C:nucleus
ESTAGB1WB006404	P:protein transport; P:transport
ESTAGB1WB006408	P:cellular process; C:intracellular organelle; F:binding; F:catalytic activity
ESTAGB1WB006409	P:nucleosome mobilization; P:ecdysone receptor-mediated signaling pathway; F:magnesium ion binding; F:inorganic diphosphatase activity; C:cytoplasm; P:transcription; C:NURF complex; P:oxidative phosphorylation
ESTAGB1WB006421	F:molecular_function; C:cellular_component
ESTAGB1WB006422	F:hydrolase activity; P:metabolic process
ESTAGB1WB006431	F:hydrolase activity; P:metabolic process
ESTAGB1WB006436	C:integral to membrane; P:amino acid transport
ESTAGB1WB006440	F:protein kinase activity
ESTAGB1WB006447	P:biological_process; F:phosphopantetheine binding; C:cellular_component
ESTAGB1WB006455	C:cytoplasm; C:adherens junction; P:Wnt receptor signaling pathway; P:segment polarity determination; P:neuroblast fate commitment; P:cell adhesion; F:transcription factor binding; F:cadherin binding; C:transcription factor complex
ESTAGB1WB006471	C:cytoplasm; F:RNA polymerase II transcription mediator activity; P:regulation of transcription from RNA polymerase II promoter, global; C:transcription factor complex
ESTAGB1WB006484	P:positive regulation of multicellular organism growth; F:ARF guanyl-nucleotide exchange factor activity; P:regulation of ARF protein signal transduction; C:intracellular; P:regulation of GTPase activity
ESTAGB1WB006488	C:cytoplasm; F:actin binding; F:protein binding
ESTAGB1WB006494	P:cellular developmental process; P:system development; F:protein kinase activity; P:cell death; F:nucleotide binding; P:regulation of cellular process; P:cellular component organization
ESTAGB1WB006495	F:phosphoprotein phosphatase activity; P:protein amino acid dephosphorylation
ESTAGB1WB006498	F:transferase activity
ESTAGB1WB006499	F:methyltransferase activity; F:transferase activity
ESTAGB1WB006501	P:mesoderm development; F:structural constituent of muscle; P:myofibril assembly; F:motor activity; C:striated muscle thick filament
ESTAGB1WB006521	C:ribosome
ESTAGB1WB006530	P:apoptosis; P:transcription initiation from RNA polymerase II promoter; P:regulation of cell cycle; F:transcription factor activity; F:transcription factor binding; F:RNA polymerase II transcription factor activity; C:transcription factor complex; P:regulation of transcription from RNA polymerase II promoter
ESTAGB1WB006531	F:protein binding; C:ribonucleoprotein complex; C:mitochondrion
ESTAGB1WB006535	P:gamete generation; P:positive regulation of growth rate; F:RNA binding; P:determination of adult life span; F:ATP-dependent RNA helicase activity; P:embryonic development ending in birth or egg hatching; C:cytoplasmic mRNA processing body; P:mRNA metabolic process; P:hermaphrodite genitalia development; P:cytoplasmic mRNA processing body assembly; P:anti-apoptosis; F:ATP binding; P:nematode lar…
ESTAGB1WB006536	F:calcium ion binding; C:cytoplasm
ESTAGB1WB006544	P:germ-band shortening; P:head involution; P:ecdysone biosynthetic process; P:instar larval development; P:response to symbiont; P:lymph gland development; P:Golgi organization; P:molting cycle, chitin-based cuticle; P:progression of morphogenetic furrow during compound eye morphogenesis; P:oogenesis; P:chitin-based embryonic cuticle biosynthetic process
ESTAGB1WB006545	P:cytokinesis; P:muscle organ development; C:brahma complex; F:transcription coactivator activity; P:dendrite morphogenesis; C:transcription factor complex; P:positive regulation of transcription
ESTAGB1WB006546	C:nucleolus; F:receptor activity; C:signalosome; F:transcription corepressor activity; P:signal transduction; P:negative regulation of transcription; P:cell proliferation; C:cytoplasm; P:neuron differentiation; P:transcription from RNA polymerase II promoter; C:transcription factor complex
ESTAGB1WB006547	F:calcium ion binding
ESTAGB1WB006551	F:peptidase activity; F:metal ion binding; F:receptor activity; F:protein binding; P:transcription; P:signal transduction
ESTAGB1WB006555	F:oxidoreductase activity; F:iron ion binding
ESTAGB1WB006559	P:regulation of nuclear mRNA splicing, via spliceosome; P:regulation of cell cycle; P:muscle organ development; F:protein binding; P:nucleosome assembly; C:RCAF complex; P:dendrite morphogenesis
ESTAGB1WB006562	C:eukaryotic translation initiation factor 3 complex; F:mRNA binding; P:regulation of translational initiation; F:translation initiation factor activity; C:cytosol; F:nucleotide binding; C:ribosome
ESTAGB1WB006571	F:metal ion binding; F:transferase activity; F:zinc ion binding; C:nucleus
ESTAGB1WB006578	F:zinc ion binding; F:protein-methionine-R-oxide reductase activity; F:peptide-methionine-(S)-S-oxide reductase activity; P:protein modification process
ESTAGB1WB006579	P:oxidation reduction; F:peptide-methionine-(S)-S-oxide reductase activity; F:peptide-methionine (R)-S-oxide reductase activity; P:protein modification process
ESTAGB1WB006587	C:mitochondrial large ribosomal subunit
ESTAGB1WB006605	C:cytoskeleton; C:cytoplasm; F:actin binding; F:structural molecule activity; C:extrinsic to membrane
ESTAGB1WB006607	C:DNA-directed RNA polymerase I complex
ESTAGB1WB006624	C:mitochondrial large ribosomal subunit; F:structural constituent of ribosome; P:translation; P:ribosome biogenesis
ESTAGB1WB006626	P:transcription initiation from RNA polymerase II promoter; P:nucleotide-excision repair, DNA damage removal; P:protein amino acid phosphorylation; F:protein C-terminus binding; F:cyclin-dependent protein kinase activity; P:cell proliferation; P:androgen receptor signaling pathway; P:regulation of cyclin-dependent protein kinase activity; P:mitosis; F:transcription coactivator activity; P:RNA elo…
ESTAGB1WB006628	P:oxidation reduction; F:oxidoreductase activity; C:integral to membrane; F:binding
ESTAGB1WB006629	C:dense fibrillar component; F:mRNA binding; C:Cajal body; C:small nucleolar ribonucleoprotein complex; P:rRNA processing; F:methyltransferase activity
ESTAGB1WB006631	C:actin cap; P:cellularization; P:germ-band extension; P:posterior midgut invagination; P:pole cell development; C:lateral plasma membrane; P:actin filament organization; C:apical cortex; C:basal part of cell; P:morphogenesis of embryonic epithelium; P:ventral furrow formation; P:actin cytoskeleton reorganization; P:regulation of embryonic cell shape; F:Rho guanyl-nucleotide exchange factor activ…
ESTAGB1WB006659	C:mitochondrial intermembrane space; P:copper ion transport; F:copper chaperone activity
ESTAGB1WB006662	P:ubiquinone biosynthetic process; C:mitochondrion; F:methyltransferase activity
ESTAGB1WB006667	F:zinc ion binding; C:intracellular
ESTAGB1WB006668	C:ribosome; F:structural constituent of ribosome; P:translation; P:ribosome biogenesis
ESTAGB1WB006671	C:mitochondrial large ribosomal subunit; F:structural constituent of ribosome; P:translation; P:ribosome biogenesis
ESTAGB1WB006675	P:regulation of viral reproduction; F:DNA binding; P:provirus integration; C:chromosome; C:nucleus; C:cytosol; P:response to virus; P:initiation of viral infection
ESTAGB1WB006681	F:calcium ion binding
ESTAGB1WB006688	F:dUTP diphosphatase activity; P:dUTP metabolic process; P:pyrimidine base metabolic process
ESTAGB1WB006693	C:transcription elongation factor complex; F:RNA polymerase II transcription elongation factor activity; P:in utero embryonic development; P:RNA elongation from RNA polymerase II promoter
ESTAGB1WB006694	F:structural molecule activity
ESTAGB1WB006695	F:signal transducer activity; C:membrane; P:signal transduction
ESTAGB1WB006696	F:hydrogen ion transporting ATP synthase activity, rotational mechanism; C:mitochondrial proton-transporting ATP synthase complex, catalytic core F(1); P:ATP synthesis coupled proton transport; F:proton-transporting ATPase activity, rotational mechanism; C:lipid particle
ESTAGB1WB006697	F:DNA binding; C:brahma complex; F:transcription coactivator activity; P:positive regulation of transcription, DNA-dependent; P:chromatin remodeling; C:transcription factor complex
ESTAGB1WB006700	F:metal ion binding; C:mitochondrion; F:copper ion binding
ESTAGB1WB006705	C:tricarboxylic acid cycle enzyme complex; C:mitochondrial matrix; P:homeostasis of number of cells within a tissue; P:fumarate metabolic process; P:malate metabolic process; F:fumarate hydratase activity; P:reductive tricarboxylic acid cycle
ESTAGB1WB006716	F:mRNA binding; F:nucleotide binding; F:calcium ion binding
ESTAGB1WB006726	P:segmentation; P:positive regulation of cell growth; P:negative regulation of Notch signaling pathway; P:compound eye photoreceptor cell differentiation; P:dorsal appendage formation; P:negative regulation of cell fate specification; P:ovarian follicle cell migration; C:cytoplasm; F:RNA polymerase II transcription factor activity; P:positive regulation of cell proliferation; P:peripheral nervous…
ESTAGB1WB006727	P:axon midline choice point recognition; F:signal transducer activity; P:phototransduction; P:activation of phospholipase C activity; C:heterotrimeric G-protein complex; P:rhodopsin mediated signaling pathway; C:inaD signaling complex; F:GTP binding; P:protein amino acid ADP-ribosylation; P:negative regulation of compound eye retinal cell programmed cell death; F:GTPase activity
ESTAGB1WB006729	C:eukaryotic translation initiation factor 2 complex; F:translation initiation factor activity; P:ribosome assembly; F:ribosome binding; F:tRNA binding; C:ribosome; P:regulation of translational initiation
ESTAGB1WB006745	F:microtubule motor activity; P:sperm individualization; P:actin filament bundle formation; C:microtubule; C:myosin complex; F:ATPase activity, coupled; P:imaginal disc-derived wing morphogenesis; C:cytoplasmic dynein complex; P:microtubule-based movement; F:dynein intermediate chain binding; C:P granule; F:protein homodimerization activity; P:bristle morphogenesis; P:spermatid nucleus elongation…
ESTAGB1WB006754	F:aldehyde dehydrogenase [NAD(P)+] activity; F:aldehyde dehydrogenase (NAD) activity; F:electron carrier activity; C:mitochondrial matrix; P:oxidation reduction; P:gluconeogenesis; P:glycolysis; P:histidine metabolic process; P:L-phenylalanine metabolic process; P:tyrosine metabolic process
ESTAGB1WB006756	P:proteolysis; C:cytoplasm; P:protein metabolic process; F:aminopeptidase activity; F:metalloexopeptidase activity; F:manganese ion binding; C:intracellular
ESTAGB1WB006758	F:ATP binding
ESTAGB1WB006761	P:phagocytosis, engulfment
ESTAGB1WB006768	F:RNA binding; C:cytoplasm; P:RNA metabolic process; F:catalytic activity; P:regulation of transcription; C:intracellular
ESTAGB1WB006771	C:mitochondrial large ribosomal subunit; F:structural constituent of ribosome; P:translation; P:ribosome biogenesis
ESTAGB1WB006779	F:nucleoside-triphosphatase activity; F:ATP binding; F:peptidase activity
ESTAGB1WB006789	C:integral to membrane; C:membrane
ESTAGB1WB006796	F:calcium-dependent cysteine-type endopeptidase activity; F:cysteine-type endopeptidase activity; C:cytoplasm; P:phagocytosis, engulfment; P:protein autoprocessing; P:proteolysis; C:intracellular; F:calcium ion binding; P:actin cytoskeleton organization
ESTAGB1WB006807	C:membrane; F:sugar binding
ESTAGB1WB006828	F:phosphoinositide binding; P:activation of caspase activity; P:clathrin coat assembly; C:membrane fraction; C:Golgi apparatus; F:clathrin binding; P:induction of apoptosis; P:positive regulation of receptor-mediated endocytosis; C:cytoskeleton; F:structural constituent of cytoskeleton
ESTAGB1WB006832	F:transferase activity, transferring sulfur-containing groups; F:glutathione dehydrogenase (ascorbate) activity; F:pyrimidodiazepine synthase activity; P:electron transport chain; P:glutathione metabolic process; P:L-ascorbic acid metabolic process
ESTAGB1WB006851	P:aminophospholipid transport; C:integral to membrane; F:ATPase activity, coupled to transmembrane movement of ions, phosphorylative mechanism; P:ATP biosynthetic process; F:cation-transporting ATPase activity; F:ATP binding; P:phospholipid transport; F:magnesium ion binding; F:phospholipid-translocating ATPase activity; P:cation transport
ESTAGB1WB006855	P:cell proliferation
ESTAGB1WB006888	C:cytoplasm; P:tRNA modification; F:protein binding
ESTAGB1WB006892	C:cytoplasm; F:binding; C:intracellular membrane-bounded organelle
ESTAGB1WB006901	C:extracellular region
ESTAGB1WB006902	C:cytoplasm; F:transcription coactivator activity; F:transcription factor activity; P:transcription from RNA polymerase II promoter; C:transcription factor complex; P:positive regulation of transcription
ESTAGB1WB006909	C:Golgi membrane; F:oxidoreductase activity; F:protein binding
ESTAGB1WB006910	P:protein transport; C:intracellular; F:GTP binding; P:small GTPase mediated signal transduction
ESTAGB1WB006915	C:nucleolus; P:induction of apoptosis; P:somatic diversification of immunoglobulins; F:enzyme binding
ESTAGB1WB006920	P:regulation of growth; F:protein serine/threonine kinase activity; C:microtubule; C:centrosome; F:nucleotide binding; C:nuclear envelope; P:protein amino acid phosphorylation; P:serine family amino acid metabolic process
ESTAGB1WB006932	F:catalytic activity
ESTAGB1WB006942	F:ATP-dependent RNA helicase activity; F:nucleic acid binding; P:ribosome biogenesis; F:ATP binding; C:nucleus
ESTAGB1WB006952	C:extracellular matrix
ESTAGB1WB006961	C:cytoplasm; F:adenylosuccinate synthase activity; F:GTP binding; P:immune system process; P:AMP biosynthetic process; F:magnesium ion binding; F:phosphate binding; P:purine base metabolic process; P:alanine metabolic process; P:aspartate metabolic process
ESTAGB1WB006963	F:structural constituent of cuticle
ESTAGB1WB006967	C:mitochondrial ribosome
ESTAGB1WB006976	P:microtubule bundle formation; C:fusome; C:spindle pole; P:spindle pole body organization; C:spindle microtubule; C:plus-end kinesin complex; P:mitotic spindle organization; P:mitotic centrosome separation; C:chromatin remodeling complex; F:ATP binding; P:plus-end directed microtubule sliding; P:mitosis; P:Golgi organization; P:protein homotetramerization; F:plus-end-directed microtubule motor a…
ESTAGB1WB006978	F:nucleic acid binding; F:nucleotide binding
ESTAGB1WB006982	P:angiogenesis; P:positive regulation of T cell cytokine production; P:neural tube formation; F:MAP kinase kinase activity; F:protein binding; P:activation of MAPKK activity; P:transforming growth factor beta receptor signaling pathway; P:positive regulation of interleukin-2 production; C:cytosol; F:metal ion binding; P:positive regulation of I-kappaB kinase/NF-kappaB cascade; P:T cell receptor s…
ESTAGB1WB006990	C:peroxisome; F:electron carrier activity; P:fatty acid beta-oxidation; F:acyl-CoA dehydrogenase activity; F:FAD binding; F:acyl-CoA oxidase activity; P:electron transport chain; P:acyl-CoA metabolic process
ESTAGB1WB007000	C:cytoplasm; C:soluble fraction; P:regulation of transcription from RNA polymerase II promoter; F:protein binding; F:RNA polymerase II transcription mediator activity; C:transcription factor complex
ESTAGB1WB007002	F:GTP binding; F:GTPase activity
ESTAGB1WB007005	C:intracellular membrane-bounded organelle; P:erythrocyte maturation; F:glucose-6-phosphate dehydrogenase activity; P:glucose 6-phosphate utilization; F:glucose binding; C:cytosol; F:NADP or NADPH binding; P:ribose phosphate biosynthetic process; P:cytokine production; P:pentose-phosphate shunt, oxidative branch; P:cholesterol biosynthetic process; C:centrosome; P:glutathione metabolic process; P…
ESTAGB1WB007007	F:nucleic acid binding; F:nucleotide binding
ESTAGB1WB007008	F:DNA-directed RNA polymerase activity; F:zinc ion binding; P:transcription initiation from RNA polymerase II promoter; C:DNA-directed RNA polymerase II, core complex; F:DNA binding; F:magnesium ion binding; P:RNA elongation from RNA polymerase II promoter; P:nuclear mRNA splicing, via spliceosome; F:ribonucleoside binding; C:nucleolus; P:purine base metabolic process; P:pyrimidine base metabolic…
ESTAGB1WB007010	P:hemocyte migration; P:MAPKKK cascade; C:intracellular; P:regulation of embryonic cell shape; P:imaginal disc-derived wing morphogenesis; F:guanyl-nucleotide exchange factor activity; P:axon target recognition; P:substrate-bound cell migration, cell extension; F:protein binding; P:regulation of small GTPase mediated signal transduction; P:oogenesis; P:regulation of compound eye photoreceptor dev…
ESTAGB1WB007013	C:mitochondrial large ribosomal subunit; F:structural constituent of ribosome; P:translation; P:ribosome biogenesis
ESTAGB1WB007027	F:pyridoxal phosphate binding; F:transferase activity, transferring nitrogenous groups; F:1-aminocyclopropane-1-carboxylate synthase activity; P:biosynthetic process; P:cellular amino acid and derivative metabolic process
ESTAGB1WB007030	F:peroxidase activity; P:peroxidase reaction; P:response to oxidative stress
ESTAGB1WB007031	C:ribosome; F:structural constituent of ribosome; P:translation; C:mitochondrion; P:ribosome biogenesis
ESTAGB1WB007035	F:cytoskeletal protein binding; C:integral to membrane; C:focal adhesion; P:motor axon guidance; P:detection of light stimulus involved in visual perception; C:extracellular region; F:transmembrane receptor activity; P:signal transduction
ESTAGB1WB007040	F:RNA binding; F:structural constituent of ribosome; P:translation; P:RNA processing; C:ribosome; C:intracellular
ESTAGB1WB007042	F:transferase activity
ESTAGB1WB007043	P:protein transport; C:late endosome membrane
ESTAGB1WB007053	F:hydrolase activity
ESTAGB1WB007055	C:mitochondrial small ribosomal subunit; F:structural constituent of ribosome; F:RNA binding; P:translation; P:ribosome biogenesis
ESTAGB1WB007059	C:mitochondrial small ribosomal subunit; F:structural constituent of ribosome; P:ribosome biogenesis
ESTAGB1WB007070	F:DNA binding; F:zinc ion binding; P:regulation of transcription, DNA-dependent
ESTAGB1WB007074	P:metabolic process; F:hydrolase activity; F:catalytic activity; C:cellular_component
ESTAGB1WB007079	C:mitochondrial small ribosomal subunit; F:structural constituent of ribosome; P:translation; P:ribosome biogenesis
ESTAGB1WB007081	P:ribosomal large subunit biogenesis; C:nucleolus
ESTAGB1WB007082	F:metal ion binding; F:zinc ion binding
ESTAGB1WB007091	F:DNA-directed RNA polymerase activity; F:transcription regulator activity; F:zinc ion binding; P:regulation of transcription; C:DNA-directed RNA polymerase II, core complex; F:DNA binding; P:transcription from RNA polymerase II promoter; C:nucleolus; P:purine base metabolic process; P:pyrimidine base metabolic process
ESTAGB1WB007097	F:molecular_function; C:integral to membrane; C:membrane
ESTAGB1WB007107	C:intracellular; F:GTP binding; P:small GTPase mediated signal transduction
ESTAGB1WB007110	P:cytoskeletal anchoring at plasma membrane; C:focal adhesion; F:calcium ion binding; P:actin cytoskeleton reorganization; F:actin filament binding; P:actin filament bundle formation
ESTAGB1WB007121	F:DNA binding; C:intracellular
ESTAGB1WB007135	C:nucleolus; C:mitochondrial large ribosomal subunit; F:mRNA binding; F:structural constituent of ribosome; P:translation; P:ribosome biogenesis
ESTAGB1WB007137	P:oxidation reduction; F:ligase activity; F:oxidoreductase activity
ESTAGB1WB007140	P:dorsal closure, amnioserosa morphology change; P:myosin II filament assembly; C:myosin II complex; P:Malpighian tubule morphogenesis; P:dorsal closure, spreading of leading edge cells; P:sarcomere organization; P:cuticle pattern formation; P:muscle contraction; P:dorsal closure, leading edge cell differentiation; F:myosin light chain binding; P:head involution; P:protein oligomerization; P:musc…
ESTAGB1WB007141	F:protein binding; C:endoplasmic reticulum
ESTAGB1WB007152	P:citrate metabolic process; F:iron ion binding; F:4 iron, 4 sulfur cluster binding; F:aconitate hydratase activity; C:mitochondrion; P:reductive tricarboxylic acid cycle; P:glyoxylate metabolic process
ESTAGB1WB007162	C:endosome; C:plasma membrane; F:protein binding; C:cytosol; C:trans-Golgi network; C:mitochondrion; P:positive regulation of TOR signaling pathway
ESTAGB1WB007166	C:lipid particle; P:metabolic process; F:catalytic activity
ESTAGB1WB007176	P:spermatogenesis
ESTAGB1WB007184	P:cysteine biosynthetic process; F:carbon-oxygen lyase activity
ESTAGB1WB007193	F:protein binding
ESTAGB1WB007201	P:transcription
ESTAGB1WB007203	P:intracellular protein transmembrane transport; C:mitochondrion; C:membrane; C:mitochondrial inner membrane; P:transport; P:protein transport
ESTAGB1WB007205	F:binding; P:cellular lipid metabolic process; P:cellular biosynthetic process; P:lipid biosynthetic process; F:catalytic activity
ESTAGB1WB007212	P:isoprenoid biosynthetic process; F:transferase activity
ESTAGB1WB007213	F:RNA binding; C:eukaryotic translation initiation factor 2 complex; F:translation initiation factor activity; C:ribosome; P:regulation of translational initiation
ESTAGB1WB007218	C:ribosome
ESTAGB1WB007219	P:mycelium development
ESTAGB1WB007220	F:zinc ion binding; C:intracellular
ESTAGB1WB007235	P:locomotion involved in locomotory behavior; P:regulation of alternative nuclear mRNA splicing, via spliceosome; P:startle response; P:sex differentiation; P:chitin-based embryonic cuticle biosynthetic process; P:protein amino acid autophosphorylation; F:protein serine/threonine/tyrosine kinase activity; P:photoreceptor cell maintenance; P:bristle morphogenesis; F:protein serine/threonine kinase…
ESTAGB1WB007236	C:nuclear lumen; P:RNA processing
ESTAGB1WB007242	C:lamellipodium; P:actin filament reorganization during cell cycle; P:phagocytosis, engulfment; P:regulation of actin filament polymerization; P:cytoplasmic transport, nurse cell to oocyte; F:actin binding; C:Arp2/3 protein complex; P:pseudocleavage during syncytial blastoderm formation; P:axonal fasciculation; P:ovarian ring canal stabilization; F:ATP binding; F:structural constituent of cytoske…
ESTAGB1WB007245	P:transport; F:lipid binding; F:transporter activity
ESTAGB1WB007249	F:tumor necrosis factor receptor binding; C:membrane; P:immune response
ESTAGB1WB007257	F:protein binding; P:steroid metabolic process; F:catalytic activity; C:mitochondrion
ESTAGB1WB007260	P:myofibril assembly; F:actin binding; F:calcium ion binding; F:hydrolase activity; P:gastrulation involving germ band extension
ESTAGB1WB007263	P:proteolysis; F:metallopeptidase activity; F:zinc ion binding
ESTAGB1WB007269	C:ribosome; C:mitochondrion
ESTAGB1WB007275	F:kinase activity; P:maintenance of apical/basal cell polarity; P:neuron maintenance
ESTAGB1WB007276	F:oxidoreductase activity; P:oxidation reduction
ESTAGB1WB007290	F:NAD or NADH binding; C:mitochondrial matrix; P:oxidation reduction; F:magnesium ion binding; P:tricarboxylic acid cycle; F:isocitrate dehydrogenase (NAD+) activity
ESTAGB1WB007292	F:kinase activity
ESTAGB1WB007293	F:transporter activity; C:intracellular; P:transport
ESTAGB1WB007297	F:LIM domain binding; C:nucleus
ESTAGB1WB007301	P:cytokinesis; P:muscle organ development; P:cytoskeleton organization; P:proteolysis; F:aspartic-type endopeptidase activity; C:brahma complex; C:actin filament; F:structural constituent of cytoskeleton; F:transcription coactivator activity; P:dendrite morphogenesis; C:transcription factor complex; P:positive regulation of transcription
ESTAGB1WB007303	F:endopeptidase activity; P:Notch signaling pathway; C:plasma membrane; C:integral to membrane
ESTAGB1WB007307	F:binding
ESTAGB1WB007317	P:muscle organ development; F:GTP-dependent protein binding; C:plasma membrane; P:Ras protein signal transduction; P:actin cytoskeleton organization; F:GTPase activity
ESTAGB1WB007327	P:biological_process; C:cellular_component
ESTAGB1WB007334	F:molecular_function; F:protein binding; C:cellular_component
ESTAGB1WB007337	F:cation transmembrane transporter activity; C:membrane; P:cation transport
ESTAGB1WB007342	F:catalytic activity; P:metabolic process
ESTAGB1WB007352	P:protein amino acid phosphorylation; F:ATP binding; F:protein serine/threonine kinase activity; P:serine family amino acid metabolic process
ESTAGB1WB007362	F:kinase activity; P:maintenance of apical/basal cell polarity; P:neuron maintenance
ESTAGB1WB007366	F:DNA-directed RNA polymerase activity; F:binding; P:regulation of transport; P:transcription from RNA polymerase III promoter; C:DNA-directed RNA polymerase I complex; P:transcription from RNA polymerase I promoter; C:DNA-directed RNA polymerase III complex; P:purine base metabolic process; P:pyrimidine base metabolic process
ESTAGB1WB007367	C:nucleus
ESTAGB1WB007369	C:cell part
ESTAGB1WB007378	C:chaperonin-containing T-complex; P:chaperone mediated protein folding independent of cofactor; C:lipid particle; P:mitotic spindle organization; F:ATP binding; F:unfolded protein binding; F:ATPase activity, coupled; P:centriole replication
ESTAGB1WB007382	C:lipid particle; F:4 iron, 4 sulfur cluster binding; F:aconitate hydratase activity; C:mitochondrion; P:reductive tricarboxylic acid cycle; P:glyoxylate metabolic process
ESTAGB1WB007389	P:anatomical structure development; P:response to stimulus; P:reproductive process; P:multicellular organismal development; P:locomotion; P:growth; P:positive regulation of biological process
ESTAGB1WB007393	C:ribosome; C:intracellular organelle part
ESTAGB1WB007398	C:cytoplasm
ESTAGB1WB007401	F:peptidyl-prolyl cis-trans isomerase activity
ESTAGB1WB007403	C:mitochondrion
ESTAGB1WB007411	C:lipid particle; F:catalytic activity
ESTAGB1WB007419	C:endoplasmic reticulum
ESTAGB1WB007423	F:kinase activity; F:adenosine kinase activity; P:purine ribonucleoside salvage
ESTAGB1WB007431	F:transferase activity, transferring acyl groups other than amino-acyl groups
ESTAGB1WB007440	P:fatty acid biosynthetic process; F:metal ion binding; P:pyruvate metabolic process; C:mitochondrial inner membrane; C:lipid particle; P:mitotic spindle organization; F:acetyl-CoA C-acetyltransferase activity; P:isoleucine catabolic process; P:leucine catabolic process; P:lysine catabolic process; P:tryptophan metabolic process; P:valine catabolic process; P:benzoate metabolic process; P:acyl-ca…
ESTAGB1WB007441	P:cytoskeletal anchoring at plasma membrane; C:focal adhesion; F:calcium ion binding; P:actin cytoskeleton reorganization; F:actin filament binding; P:actin filament bundle formation
ESTAGB1WB007445	C:ribosome
ESTAGB1WB007447	P:oxidation reduction; F:selenium binding; P:cellular alcohol metabolic process; F:oxidoreductase activity; F:glucose dehydrogenase activity; C:extracellular region; F:oxidoreductase activity, acting on CH-OH group of donors; F:FAD binding
ESTAGB1WB007452	P:translation; C:mitochondrial large ribosomal subunit
ESTAGB1WB007464	C:cell part
ESTAGB1WB007465	C:integral to membrane
ESTAGB1WB007474	F:molecular_function; P:biological_process
ESTAGB1WB007482	C:integral to membrane
ESTAGB1WB007485	C:eukaryotic translation initiation factor 3 complex; P:formation of translation initiation complex; P:mature ribosome assembly; F:protein binding; F:translation initiation factor activity; C:nucleus; C:cytosol; F:ribosome binding; F:structural molecule activity; C:ribosome; P:regulation of translational initiation
ESTAGB1WB007490	F:binding
ESTAGB1WB007494	P:oxidation reduction; F:binding; F:L-aminoadipate-semialdehyde dehydrogenase activity; P:lysine catabolic process; P:lysine biosynthetic process
ESTAGB1WB007496	P:neurotransmitter receptor metabolic process; P:fatty acid transport; P:aspartate catabolic process; P:glutamate catabolic process to 2-oxoglutarate; P:aspartate biosynthetic process; F:L-aspartate:2-oxoglutarate aminotransferase activity; C:mitochondrial inner membrane; P:response to ethanol; P:glutamate biosynthetic process; P:glutamate catabolic process to aspartate; P:synaptogenesis; C:mitoc…
ESTAGB1WB007499	C:integral to membrane; P:multicellular organismal development; P:cell differentiation
ESTAGB1WB007501	F:lysine-tRNA ligase activity; P:lysyl-tRNA aminoacylation; F:nucleotide binding; P:lysine biosynthetic process
ESTAGB1WB007502	P:lipopolysaccharide biosynthetic process; F:beta-1,4-mannosyltransferase activity; P:protein amino acid glycosylation; C:membrane; C:endoplasmic reticulum; C:alpha-1,6-mannosyltransferase complex
ESTAGB1WB007503	F:hydrolase activity; C:intracellular part
ESTAGB1WB007505	F:structural molecule activity; P:vesicle-mediated transport; P:intracellular protein transport; C:membrane coat; F:protein binding
ESTAGB1WB007514	F:L-malate dehydrogenase activity; P:oxidation reduction; F:oxidoreductase activity; P:carbohydrate metabolic process; F:catalytic activity; P:malate metabolic process
ESTAGB1WB007520	F:delta1-pyrroline-5-carboxylate synthetase activity; C:mitochondrial inner membrane; C:lipid particle; F:glutamate 5-kinase activity; F:glutamate-5-semialdehyde dehydrogenase activity; P:urea cycle intermediate metabolic process; P:glutamate biosynthetic process; P:phosphorylation
ESTAGB1WB007526	F:structural constituent of ribosome; P:translation; C:ribosome; C:intracellular
ESTAGB1WB007527	C:cortical cytoskeleton; P:compound eye photoreceptor cell differentiation; P:cell-cell signaling; P:regulation of cell shape; C:actin filament; P:leukocyte adhesion; P:negative regulation of organ growth; P:regulation of compound eye retinal cell programmed cell death; P:endocytic recycling; P:regulation of cell growth; P:decapentaplegic receptor signaling pathway; C:filopodium; P:cytoskeletal a…
ESTAGB1WB007532	F:transferase activity
ESTAGB1WB007545	C:cytoplasm; F:actin binding; P:cellular component organization; F:Rho GTPase binding; P:actin cytoskeleton organization
ESTAGB1WB007551	F:signal transducer activity; P:regulation of oviposition; P:negative regulation of locomotion; P:pronuclear migration; C:heterotrimeric G-protein complex; P:nematode larval development; P:embryonic development; P:signal transduction; F:histone acetyltransferase activity; P:establishment of mitotic spindle orientation; C:histone acetyltransferase complex; P:acyl-carrier-protein biosynthetic proce…
ESTAGB1WB007552	F:binding; P:biological_process
ESTAGB1WB007557	P:histidine catabolic process; P:cuticle chitin biosynthetic process; P:embryonic epithelial tube formation; P:torso signaling pathway; F:dopamine beta-monooxygenase activity; P:regulation of tube diameter, open tracheal system; P:chitin-based embryonic cuticle biosynthetic process; P:tyrosine metabolic process; P:catecholamine metabolic process
ESTAGB1WB007573	F:protein binding
ESTAGB1WB007575	C:Golgi apparatus; F:calcium ion binding; C:endoplasmic reticulum
ESTAGB1WB007578	F:cytoskeletal protein binding; C:dystrobrevin complex; F:calcium ion binding; F:zinc ion binding
ESTAGB1WB007584	F:metal ion binding; C:cell part
ESTAGB1WB007588	F:binding; P:cellular biopolymer metabolic process; P:nucleobase, nucleoside, nucleotide and nucleic acid metabolic process
ESTAGB1WB007592	F:mannose-1-phosphate guanylyltransferase activity; P:biosynthetic process; F:GTP binding; P:fructose metabolic process; P:mannose metabolic process
ESTAGB1WB007607	P:axon midline choice point recognition; P:negative regulation of microtubule depolymerization; F:phosphatidylinositol-4,5-bisphosphate binding; P:spectrosome organization; P:plasma membrane organization; C:spectrin; C:spectrosome; F:microtubule binding; C:lateral plasma membrane; C:axon; P:fusome organization; F:actin filament binding; P:long-term strengthening of neuromuscular junction; C:apico…
ESTAGB1WB007615	P:cellular carbohydrate metabolic process; F:binding; C:lipid particle; F:L-malate dehydrogenase activity; P:malate metabolic process; P:oxidation reduction; P:glycolysis; C:cytosol; P:pyruvate metabolic process; P:reductive tricarboxylic acid cycle; P:glyoxylate metabolic process
ESTAGB1WB007619	P:compound eye morphogenesis; C:membrane; C:early endosome; C:late endosome; P:regulation of compound eye pigmentation; P:protein targeting to lysosome; F:receptor activity; F:protein binding; P:Wnt receptor signaling pathway; C:plasma membrane; F:Wnt receptor activity
ESTAGB1WB007624	F:binding
ESTAGB1WB007646	F:metalloendopeptidase activity; F:ATP binding; F:microtubule-severing ATPase activity; C:integral to membrane; P:proteolysis; F:zinc ion binding; C:endoplasmic reticulum; C:mitochondrion
ESTAGB1WB007647	P:flight behavior; P:glycerol-3-phosphate metabolic process; C:lipid particle; P:glycerophosphate shuttle; F:calcium ion binding; F:glycerol-3-phosphate dehydrogenase activity; C:glycerol-3-phosphate dehydrogenase complex; C:mitochondrion; P:electron transport chain; P:glycerolipid metabolic process
ESTAGB1WB007654	F:ATP-dependent RNA helicase activity; C:spliceosome complex; F:nucleic acid binding; P:regulation of alternative nuclear mRNA splicing, via spliceosome; P:mitotic spindle organization; F:ATP binding; P:mRNA export from nucleus; F:RNA splicing factor activity, transesterification mechanism
ESTAGB1WB007658	P:protein processing; F:metallopeptidase activity; C:mitochondrion
ESTAGB1WB007661	F:binding; C:intracellular part
ESTAGB1WB007676	C:SAGA complex; C:nuclear periphery; F:transcription activator activity; F:protein binding; P:poly(A)+ mRNA export from nucleus; P:positive regulation of transcription
ESTAGB1WB007677	F:metal ion binding; P:oxidation reduction; F:oxidoreductase activity; F:electron carrier activity; F:heme binding; F:iron ion binding; F:monooxygenase activity
ESTAGB1WB007691	P:GMP biosynthetic process; F:GMP synthase activity; F:GMP synthase (glutamine-hydrolyzing) activity; F:enzyme binding; C:cytosol; F:nucleotide binding; P:purine base metabolic process; P:glutamate metabolic process
ESTAGB1WB007693	P:carbohydrate metabolic process; F:cation binding; F:catalytic activity
ESTAGB1WB007694	P:ER to Golgi vesicle-mediated transport; C:endoplasmic reticulum; C:perinuclear region of cytoplasm; C:Golgi apparatus
ESTAGB1WB007706	F:translation initiation factor activity; P:myelination; C:eukaryotic translation initiation factor 2B complex; F:guanyl-nucleotide exchange factor activity; P:ovarian follicle development; F:ATP binding; F:protein binding; P:oligodendrocyte development; P:cellular response to stimulus; F:GTP binding; C:ribosome; P:regulation of translational initiation; P:regulation of GTPase activity
ESTAGB1WB007713	P:cellular amino acid and derivative metabolic process; C:mitochondrion; P:response to toxin
ESTAGB1WB007717	C:mitochondrial ribosome; C:small ribosomal subunit
ESTAGB1WB007719	C:cytoplasm; C:intracellular non-membrane-bounded organelle; F:protein binding
ESTAGB1WB007727	F:nucleic acid binding; F:nucleotide binding
ESTAGB1WB007733	F:RNA binding; C:nuclear pore; F:protein binding; F:nucleotide binding; F:helicase activity; P:mRNA export from nucleus; C:cytoplasm; P:protein transport
ESTAGB1WB007737	C:endoplasmic reticulum
ESTAGB1WB007743	C:fusome; P:germ-line cyst formation; P:meiotic spindle organization; P:testicular fusome organization; P:cystoblast division; C:germline ring canal; P:ovarian fusome organization; P:centrosome organization; C:spectrosome; C:lipid particle; C:plasma membrane
ESTAGB1WB007745	C:striated muscle thick filament; P:striated muscle contraction; F:motor activity
ESTAGB1WB007752	P:chromatin modification; P:primary metabolic process; F:acyltransferase activity; P:cellular biopolymer metabolic process; P:acyl-carrier-protein biosynthetic process
ESTAGB1WB007764	F:structural constituent of ribosome; C:small ribosomal subunit; P:translation; P:ribosome biogenesis
ESTAGB1WB007777	F:hydrolase activity
ESTAGB1WB007785	F:zinc ion binding
ESTAGB1WB007787	F:methyltransferase activity
ESTAGB1WB007788	C:lipid particle; P:metabolic process; F:catalytic activity
ESTAGB1WB007790	F:ARF GTPase activator activity; P:regulation of ARF GTPase activity; F:zinc ion binding
ESTAGB1WB007797	F:RNA binding; C:eukaryotic translation initiation factor 2 complex; F:translation initiation factor activity; C:ribosome; P:regulation of translational initiation
ESTAGB1WB007798	P:cell redox homeostasis; F:FAD binding; C:cytoplasm; P:oxidation reduction; F:electron carrier activity; F:dihydrolipoyl dehydrogenase activity; P:electron transport chain; P:gluconeogenesis; P:glycolysis; P:tricarboxylic acid cycle; P:glycine metabolic process; P:L-serine metabolic process; P:threonine metabolic process
ESTAGB1WB007800	F:protein N-terminus binding; C:cytoplasm
ESTAGB1WB007808	F:calcium ion binding; P:mesoderm development
ESTAGB1WB007823	F:damaged DNA binding; P:nucleotide-excision repair; C:nucleus
ESTAGB1WB007832	P:glycolipid biosynthetic process; F:alpha-1,4-N-acetylgalactosaminyltransferase activity
ESTAGB1WB007833	F:oxidoreductase activity, acting on paired donors, with incorporation or reduction of molecular oxygen; P:oxidation reduction; F:L-ascorbic acid binding; F:iron ion binding; F:zinc ion binding
ESTAGB1WB007835	P:histone H4 acetylation; F:DNA helicase activity; P:regulation of transcription from RNA polymerase II promoter; P:cell cycle; P:histone H2A acetylation; P:spermatogenesis; C:NuA4 histone acetyltransferase complex; F:ATPase activity; F:protein binding; F:nucleotide binding; C:ribonucleoprotein complex; C:replication fork
ESTAGB1WB007849	P:cell redox homeostasis; C:cell cortex; F:electron carrier activity; F:protein disulfide oxidoreductase activity; F:protein binding; P:electron transport chain
ESTAGB1WB007857	F:metal ion binding; F:zinc ion binding; C:intracellular
ESTAGB1WB007858	P:transport; F:binding; P:multicellular organismal process; P:establishment of localization in cell
ESTAGB1WB007860	F:binding; C:cell part
ESTAGB1WB007864	F:dopachrome isomerase activity; F:cytokine activity; C:extracellular space; C:extracellular region; F:isomerase activity
ESTAGB1WB007866	P:proteolysis; F:aminopeptidase activity; C:intracellular
ESTAGB1WB007867	F:oxidoreductase activity; F:electron carrier activity; C:mitochondrial matrix; P:transport; F:FAD binding; P:electron transport chain; P:electron transport chain
ESTAGB1WB007872	P:carbohydrate metabolic process; F:cation binding; F:catalytic activity
ESTAGB1WB007884	P:microtubule-based movement; F:ATP binding; F:microtubule motor activity; C:microtubule
ESTAGB1WB007893	F:iron ion binding; P:iron-sulfur cluster assembly; F:structural molecule activity; C:mitochondrion; F:iron-sulfur cluster binding
ESTAGB1WB007898	F:helicase activity
ESTAGB1WB007900	F:GTP binding; F:GTPase binding; F:guanyl-nucleotide exchange factor activity
ESTAGB1WB007911	P:regulation of transcription; C:nucleus
ESTAGB1WB007918	F:protein binding
ESTAGB1WB007921	F:glycine binding; F:thienylcyclohexylpiperidine binding
ESTAGB1WB007925	C:glycine cleavage complex; P:gastrulation; P:cell redox homeostasis; F:electron carrier activity; P:sperm capacitation; P:tricarboxylic acid cycle; P:lipoamide metabolic process; P:proteolysis; P:mitochondrial electron transport, NADH to ubiquinone; C:acrosomal matrix; C:mitochondrial alpha-ketoglutarate dehydrogenase complex; C:flagellum; F:dihydrolipoyl dehydrogenase activity; P:regulation of …
ESTAGB1WB007929	P:rhodopsin biosynthetic process; F:helicase activity; F:nucleic acid binding; F:nucleotide binding
ESTAGB1WB007930	F:hydrolase activity; F:protein binding
ESTAGB1WB007936	P:RNA interference
ESTAGB1WB007939	C:integral to membrane
ESTAGB1WB007940	F:deoxyribose-phosphate aldolase activity; P:deoxyribonucleoside catabolic process; F:protein binding; P:pentose-phosphate shunt
ESTAGB1WB007953	P:regulation of transcription from RNA polymerase II promoter; P:positive regulation of cell proliferation; P:iron-sulfur cluster assembly; F:protein binding
ESTAGB1WB007958	P:cell cycle arrest; P:gastrulation; P:cyclin catabolic process; C:cullin-RING ubiquitin ligase complex; F:ubiquitin protein ligase binding; P:trophectodermal cellular morphogenesis; P:induction of apoptosis by intracellular signals; P:G1/S transition of mitotic cell cycle; P:positive regulation of cell proliferation; F:cyclin binding; C:Golgi apparatus; C:nucleus
ESTAGB1WB007959	F:nucleic acid binding; F:helicase activity; F:nucleotide binding
ESTAGB1WB007974	P:regulation of transcription from RNA polymerase II promoter; P:transcription initiation from RNA polymerase II promoter; F:cyclin-dependent protein kinase regulator activity; C:nuclear cyclin-dependent protein kinase holoenzyme complex; F:RNA polymerase II transcription mediator activity; F:protein binding; F:kinase activity; P:G1/S transition of mitotic cell cycle; ; P:regulation of protein ki…
ESTAGB1WB007991	P:female meiosis chromosome segregation; C:protein complex; F:endonuclease activity; P:nucleotide-excision repair, DNA incision; P:double-strand break repair; P:mismatch repair; P:resolution of meiotic joint molecules as recombinants; F:protein heterodimerization activity; C:nuclear part; F:structure-specific DNA binding
ESTAGB1WB007996	C:spliceosome complex; P:regulation of alternative nuclear mRNA splicing, via spliceosome; P:mRNA catabolic process; C:snRNP U6; F:U6 snRNA binding; F:protein kinase binding; C:U4/U6 x U5 tri-snRNP complex; C:cytoplasm; P:assembly of spliceosomal tri-snRNP
ESTAGB1WB008000	F:heme binding; P:oxidation reduction; F:monooxygenase activity; F:electron carrier activity; C:mitochondrion; P:electron transport chain
ESTAGB1WB008003	P:protein transport
ESTAGB1WB008021	P:protein folding; P:regulation of post-mating oviposition; F:peptidyl-prolyl cis-trans isomerase activity
ESTAGB1WB008022	C:cytoplasm; P:proteolysis; F:aminopeptidase activity
ESTAGB1WB008028	F:4 iron, 4 sulfur cluster binding; F:aconitate hydratase activity; P:reductive tricarboxylic acid cycle; P:glyoxylate metabolic process
ESTAGB1WB008029	F:RNA binding; F:ATP-dependent RNA helicase activity; C:spliceosome complex; P:regulation of alternative nuclear mRNA splicing, via spliceosome; F:ATP binding; F:RNA splicing factor activity, transesterification mechanism
ESTAGB1WB008041	F:kinase activity; P:integrin-mediated signaling pathway; F:calcium ion binding
ESTAGB1WB008044	P:nucleotide-excision repair, DNA damage removal; P:response to oxidative stress; F:damaged DNA binding; F:single-stranded DNA specific endodeoxyribonuclease activity; P:nucleotide-excision repair, DNA incision, 3'-to lesion; F:protein C-terminus binding; P:mitotic recombination; P:negative regulation of telomere maintenance; F:protein domain specific binding; C:nuclear chromosome, telomeric regi…
ESTAGB1WB008056	F:signal transducer activity; F:zinc ion binding; C:dystrophin-associated glycoprotein complex; P:regulation of short-term neuronal synaptic plasticity; P:muscle organ development; P:branch fusion, open tracheal system; F:calcium ion binding; F:transcription activator activity; F:protein heterodimerization activity; F:actin binding; F:structural constituent of muscle; F:sequence-specific DNA bind…
ESTAGB1WB008059	P:chromatin-mediated maintenance of transcription; P:axonogenesis; P:dendrite morphogenesis; F:general RNA polymerase II transcription factor activity; P:muscle organ development; P:phagocytosis, engulfment; F:helicase activity; F:transcription coactivator activity; F:DNA binding; P:imaginal disc-derived wing vein specification; P:oogenesis; P:hemocyte proliferation; C:brahma complex; F:ATP bindi…
ESTAGB1WB008061	F:molecular_function; C:cellular_component
ESTAGB1WB008066	C:plasma membrane; C:basal part of cell; F:protein binding; P:olfactory learning; P:asymmetric protein localization; C:membrane part
ESTAGB1WB008084	F:gamma-glutamyltransferase activity; F:transferase activity; P:biological_process; C:cellular_component
ESTAGB1WB008086	F:lysozyme activity; C:membrane
ESTAGB1WB008111	F:structural constituent of cuticle
ESTAGB1WB008118	C:ribosome; F:structural constituent of ribosome; P:translation; F:rRNA binding; P:ribosome biogenesis
ESTAGB1WB008145	F:zinc ion binding; F:protein binding; F:DNA binding
ESTAGB1WB008146	P:regulation of nuclear mRNA splicing, via spliceosome; P:regulation of cell cycle; P:muscle organ development; F:protein binding; P:nucleosome assembly; C:RCAF complex; P:dendrite morphogenesis
ESTAGB1WB008152	F:methyltransferase activity; F:transferase activity
ESTAGB1WB008161	C:ribosome; F:structural constituent of ribosome; P:translation; P:ribosome biogenesis
ESTAGB1WB008171	P:protein folding; P:hemopoiesis; P:protein export from nucleus; F:ATP binding; F:ATPase activity; C:mitochondrial matrix; F:unfolded protein binding; P:response to stress
ESTAGB1WB008172	C:nuclear inner membrane
ESTAGB1WB008180	P:cellular biosynthetic process; P:primary metabolic process; P:anatomical structure formation involved in morphogenesis; P:morphogenesis of follicular epithelium; F:galactosyltransferase activity; P:ovarian follicle cell development; C:membrane; F:acetylglucosaminyltransferase activity
ESTAGB1WB008191	P:coenzyme biosynthetic process; P:cellular nitrogen compound biosynthetic process; F:FMN adenylyltransferase activity; C:cytosol; P:primary metabolic process; F:nucleotide binding; P:riboflavin metabolic process
ESTAGB1WB008193	C:mitochondrial large ribosomal subunit; F:structural constituent of ribosome; P:translation; P:ribosome biogenesis
ESTAGB1WB008204	F:binding; C:integral to membrane; P:modification-dependent protein catabolic process; F:catalytic activity
ESTAGB1WB008210	P:G-protein coupled receptor protein signaling pathway; C:integral to membrane; F:G-protein coupled receptor activity
ESTAGB1WB008212	F:GTPase activator activity; F:binding; P:establishment of spindle orientation; P:signal transduction
ESTAGB1WB008227	P:cytoskeleton organization; F:protein binding; C:actin cytoskeleton
ESTAGB1WB008228	F:fumarylacetoacetase activity; P:tyrosine catabolic process; P:carbon utilization by utilization of organic compounds; P:L-phenylalanine catabolic process; P:styrene catabolic process
ESTAGB1WB008231	P:cGMP metabolic process; P:cAMP metabolic process; P:signal transduction; F:3',5'-cyclic-AMP phosphodiesterase activity; F:3',5'-cyclic-GMP phosphodiesterase activity
ESTAGB1WB008234	P:biological_process; C:cellular_component
ESTAGB1WB008257	F:signal transducer activity
ESTAGB1WB008268	F:catalytic activity; P:metabolic process
ESTAGB1WB008296	P:cytoplasmic mRNA processing body assembly; F:ATP-dependent RNA helicase activity; F:RNA binding; C:cytoplasmic mRNA processing body
ESTAGB1WB008314	F:chitin binding; P:chitin metabolic process; P:cell adhesion; C:extracellular region
ESTAGB1WB008318	P:determination of adult life span; P:reproduction; P:embryonic development ending in birth or egg hatching; F:protein binding; C:sarcoplasmic reticulum; P:regulation of muscle contraction; P:cellular calcium ion homeostasis; P:growth; P:negative regulation of heart contraction; C:membrane fraction; P:calcium ion transport; F:calcium ion binding; C:integral to membrane; C:nuclear envelope-endopla…
ESTAGB1WB008348	P:mitotic chromosome condensation; P:skeletal muscle tissue development; P:myoblast fusion; P:muscle attachment; F:actin binding; P:sister chromatid cohesion; C:Z disc; C:sarcomere; C:condensed nuclear chromosome; F:structural constituent of muscle; P:locomotion; P:sarcomere organization
ESTAGB1WB008357	C:basement membrane; P:embryonic morphogenesis; P:tissue development; F:zinc ion binding; C:proteinaceous extracellular matrix; P:organ morphogenesis; C:intracellular
ESTAGB1WB008360	C:intracellular
ESTAGB1WB008370	P:oxidation reduction; F:D-amino-acid oxidase activity; F:binding; P:electron transport chain; P:arginine metabolic process; P:glycine metabolic process; P:proline metabolic process; P:L-serine metabolic process; P:threonine metabolic process; P:ornithine metabolic process
ESTAGB1WB008382	C:mitochondrial small ribosomal subunit; F:structural constituent of ribosome; P:ribosome biogenesis
ESTAGB1WB008392	P:catecholamine metabolic process; F:dopamine beta-monooxygenase activity; P:tyrosine metabolic process
ESTAGB1WB008394	C:integral to membrane
ESTAGB1WB008397	F:metal ion binding
ESTAGB1WB008404	F:ATPase activity; P:regulation of protein complex assembly; F:ATP binding; F:unfolded protein binding; C:nucleus
ESTAGB1WB008410	P:organelle organization; P:cellular component assembly; P:cellular component morphogenesis
ESTAGB1WB008413	P:microtubule-based movement; P:mitotic spindle organization; P:mitotic sister chromatid segregation; C:kinetochore microtubule; F:ATP binding; P:mitotic anaphase A; C:spindle pole; C:kinesin complex; F:microtubule motor activity
ESTAGB1WB008421	F:catalytic activity
ESTAGB1WB008426	P:DNA-dependent DNA replication; F:DNA-directed DNA polymerase activity; F:metal ion binding; F:DNA binding; C:nucleus; F:nucleotide binding; P:DNA repair; C:DNA polymerase complex
ESTAGB1WB008433	C:cytoskeleton; F:actin binding; P:mesoderm development
ESTAGB1WB008439	F:protein serine/threonine kinase activity; F:nucleotide binding; P:serine family amino acid metabolic process; P:phosphorylation
ESTAGB1WB008453	F:DNA binding; P:regulation of transcription; C:membrane
ESTAGB1WB008464	F:acyl-CoA dehydrogenase activity; P:transcription initiation from RNA polymerase II promoter; P:oxidation reduction; F:electron carrier activity; F:RNA polymerase II transcription mediator activity; F:FAD binding; P:dendrite morphogenesis; P:electron transport chain; C:transcription factor complex; P:regulation of transcription from RNA polymerase II promoter
ESTAGB1WB008471	C:eukaryotic translation initiation factor 3 complex; P:regulation of translational initiation; F:translation initiation factor activity; C:cytosol; C:ribosome
ESTAGB1WB008477	F:ubiquitin protein ligase binding; C:cullin-RING ubiquitin ligase complex; P:ubiquitin-dependent protein catabolic process
ESTAGB1WB008480	F:binding
ESTAGB1WB008492	P:chromosome condensation; F:3'-5' DNA helicase activity; F:DNA binding; P:positive regulation of S phase of mitotic cell cycle; P:DNA replication initiation; C:pre-replicative complex; P:DNA amplification; C:cytoplasm; F:chromatin binding; C:replication fork; C:chromatin
ESTAGB1WB008496	P:axon guidance; P:neuron migration; P:negative regulation of neuron differentiation; F:protein binding; F:adenosine deaminase activity; P:regulation of cell migration; P:hindbrain development; P:oligodendrocyte cell fate specification; P:pituitary gland development; P:protein localization in organelle; P:lens development in camera-type eye; P:positive regulation of epithelial cell differentiatio…
ESTAGB1WB008524	F:p53 binding; F:signal transducer activity; P:lung development; P:positive regulation of transcription factor activity; C:outer kinetochore of condensed chromosome; F:zinc ion binding; F:histone acetyltransferase activity; F:protein C-terminus binding; C:histone acetyltransferase complex; P:protein complex assembly; C:PML body; P:heart development; F:peroxisome proliferator activated receptor bi…
ESTAGB1WB008557	F:protein disulfide isomerase activity
ESTAGB1WB008566	P:metabolic process; F:catalytic activity; F:isomerase activity
ESTAGB1WB008567	F:zinc ion transmembrane transporter activity; F:zinc ion binding; P:zinc ion transport; C:integral to membrane; P:regulation of transcription; F:nucleotide binding; C:nucleus
ESTAGB1WB008570	F:nucleic acid binding; C:intracellular organelle; P:phagocytosis, engulfment
ESTAGB1WB008577	F:metal ion binding; F:hydrolase activity; F:transferase activity; C:endosome membrane; P:endocytosis
ESTAGB1WB008584	F:ion channel activity; F:voltage-gated ion channel activity; C:integral to membrane; C:membrane; P:potassium ion transport; P:ion transport; P:transport; F:voltage-gated potassium channel activity; C:plasma membrane
ESTAGB1WB008591	C:cytoplasm; F:glycolipid transporter activity; F:glycolipid binding; P:glycolipid transport
ESTAGB1WB008605	P:histidine catabolic process; F:dopamine beta-monooxygenase activity; P:tyrosine metabolic process; P:catecholamine metabolic process
ESTAGB1WB008613	F:ligase activity; C:Golgi apparatus; F:ARF guanyl-nucleotide exchange factor activity; P:cellular protein metabolic process; P:regulation of GTPase activity
ESTAGB1WB008631	C:cytoplasm; P:histone deacetylation; P:regulation of transcription; F:zinc ion binding; F:histone deacetylase activity; C:histone deacetylase complex
ESTAGB1WB008641	P:biosynthetic process; F:ATP binding; F:ligase activity; P:folic acid and derivative biosynthetic process; F:tetrahydrofolylpolyglutamate synthase activity
ESTAGB1WB008651	C:integral to membrane; C:membrane
ESTAGB1WB008661	F:nucleic acid binding; F:zinc ion binding; P:biological_process; C:nucleus; C:intracellular
ESTAGB1WB008663	C:intracellular; F:Rab GTPase activator activity; P:regulation of Rab GTPase activity
ESTAGB1WB008666	F:structural constituent of ribosome; C:lipid particle; F:RNA binding; C:small ribosomal subunit; P:translation; P:ribosome biogenesis
ESTAGB1WB008672	F:alpha-ketoacid dehydrogenase activity; F:metal ion binding; F:3-methyl-2-oxobutanoate dehydrogenase (2-methylpropanoyl-transferring) activity; P:oxidation reduction; P:response to nutrient; F:protein complex binding; P:response to glucocorticoid stimulus; C:mitochondrial alpha-ketoglutarate dehydrogenase complex; P:positive regulation of transcription, DNA-dependent; F:cyclin-dependent protein …
ESTAGB1WB008678	P:imaginal disc-derived wing hair organization; P:cuticle pattern formation; P:antennal morphogenesis; P:neuron projection morphogenesis; P:microvillar actin bundle formation; F:actin binding; C:filamentous actin; P:bristle morphogenesis; P:oogenesis
ESTAGB1WB008679	P:peripheral nervous system development; F:binding; P:neuron projection morphogenesis; C:integral to membrane; P:response to axon injury; F:protein binding; C:extracellular region; C:plasma membrane
ESTAGB1WB008683	C:integral to membrane; C:membrane; P:Bolwig's organ morphogenesis; P:defasciculation of motor neuron axon
ESTAGB1WB008690	C:cell part
ESTAGB1WB008693	C:plasma membrane; F:beta-N-acetylglucosaminidase activity; P:carbohydrate metabolic process
ESTAGB1WB008705	C:membrane-bounded organelle; F:protein binding; C:axon; C:ciliary rootlet; C:cytoplasmic vesicle; C:cytosol; C:kinesin complex; P:axon cargo transport; F:microtubule motor activity; C:microtubule
ESTAGB1WB008708	C:kinetochore microtubule; P:mRNA transport; C:spindle pole centrosome; P:response to red light; P:kinetochore organization; P:mitotic spindle organization; P:compound eye photoreceptor fate commitment; P:rhabdomere development; P:ring gland development; P:spindle assembly; P:intracellular protein transport; C:kinetochore; P:second mitotic wave during compound eye morphogenesis; P:mitochondrion t…
ESTAGB1WB008716	C:cytoplasm; C:nucleolus; F:ATP-dependent RNA helicase activity; F:nucleic acid binding; F:ATP binding; P:RNA metabolic process
ESTAGB1WB008721	P:metabolic process; F:catalytic activity
ESTAGB1WB008724	C:postsynaptic membrane; F:protein domain specific binding
ESTAGB1WB008729	F:nucleoside-triphosphatase activity; F:ATP binding
ESTAGB1WB008736	C:integral to membrane; C:membrane
ESTAGB1WB008751	F:zinc ion binding; F:carbonate dehydratase activity; P:carbon utilization
ESTAGB1WB008774	F:receptor binding; C:cytosol; P:transmembrane receptor protein tyrosine kinase signaling pathway; P:response to peptide hormone stimulus; P:intracellular signaling cascade; P:cellular response to hormone stimulus
ESTAGB1WB008785	F:binding
ESTAGB1WB008787	F:hydrolase activity; P:proteolysis; C:membrane
ESTAGB1WB008789	F:nucleic acid binding; P:transmembrane receptor protein tyrosine kinase signaling pathway; P:endoderm development; P:antimicrobial humoral response; P:cell proliferation; C:lipid particle; P:compound eye photoreceptor cell differentiation
ESTAGB1WB008801	F:binding
ESTAGB1WB008809	P:metabolic process; F:transcription factor binding; F:catalytic activity; C:transcription factor complex
ESTAGB1WB008824	F:binding
ESTAGB1WB008834	F:ATPase activity, coupled to transmembrane movement of substances; C:ATP-binding cassette (ABC) transporter complex; F:nucleotide binding; P:transport
ESTAGB1WB008839	F:holo-[acyl-carrier-protein] synthase activity; F:protein binding; F:magnesium ion binding; C:cytosol; P:pantothenate biosynthetic process
ESTAGB1WB008843	C:cytosol; F:enoyl-[acyl-carrier-protein] reductase (NADPH, B-specific) activity; F:[acyl-carrier-protein] S-malonyltransferase activity; F:oleoyl-[acyl-carrier-protein] hydrolase activity; F:protein binding; F:3-oxoacyl-[acyl-carrier-protein] reductase activity; F:3-oxoacyl-[acyl-carrier-protein] synthase activity; C:Golgi apparatus; F:[acyl-carrier-protein] S-acetyltransferase activity; C:fatty…
ESTAGB1WB008847	F:kinase activity; F:nucleotide binding
ESTAGB1WB008868	C:integral to membrane; C:transport vesicle
ESTAGB1WB008883	F:tubulin-tyrosine ligase activity; P:protein modification process
ESTAGB1WB008888	F:binding
ESTAGB1WB008894	F:nucleic acid binding; F:methyltransferase activity; P:methylation
ESTAGB1WB008901	F:molecular_function; C:cellular_component
ESTAGB1WB008906	C:cytoplasm; P:regulation of protein catabolic process; P:modification-dependent protein catabolic process; P:protein modification process; F:acid-amino acid ligase activity; F:protein binding; P:locomotion; P:embryonic development ending in birth or egg hatching
ESTAGB1WB008908	P:axon midline choice point recognition; P:negative regulation of microtubule depolymerization; F:phosphatidylinositol-4,5-bisphosphate binding; C:spectrosome; F:microtubule binding; C:lateral plasma membrane; C:axon; P:long-term strengthening of neuromuscular junction; P:neuromuscular synaptic transmission; C:lipid particle; P:maintenance of presynaptic active zone structure; C:tubulin complex
ESTAGB1WB008915	F:metalloendopeptidase activity; F:ATP binding; F:nucleoside-triphosphatase activity; P:proteolysis; C:membrane
ESTAGB1WB008926	P:DNA replication; P:cell cycle; F:DNA binding; C:nucleus
ESTAGB1WB008934	F:zinc ion binding
ESTAGB1WB008937	F:DNA binding; P:DNA duplex unwinding; C:mitochondrial matrix; F:DNA helicase activity; F:ATP binding; C:nucleus; C:replication fork
ESTAGB1WB008947	F:ATP binding; F:nucleoside-triphosphatase activity
ESTAGB1WB008949	F:chitin binding
ESTAGB1WB008957	C:endoplasmic reticulum
ESTAGB1WB008963	P:pharyngeal system development; P:regulation of histone deacetylation; P:cartilage development; P:regulation of fibroblast growth factor receptor signaling pathway; C:histone deacetylase complex; F:protein binding; P:chromatin remodeling
ESTAGB1WB008965	C:membrane; F:nucleoside transmembrane transporter activity; P:transport
ESTAGB1WB008987	F:heme binding; F:monooxygenase activity; F:electron carrier activity; P:electron transport chain
ESTAGB1WB008988	P:glutamyl-tRNA aminoacylation; C:mitochondrion; F:ATP binding; F:glutamate-tRNA ligase activity; C:glutamate-tRNA ligase complex; P:chlorophyll metabolic process
ESTAGB1WB008991	F:metal ion binding; F:molecular_function; P:integrin-mediated signaling pathway; P:biological_process; F:zinc ion binding; C:cellular_component
ESTAGB1WB008995	P:protein folding; F:unfolded protein binding; F:heat shock protein binding
ESTAGB1WB008996	P:protein amino acid phosphorylation; C:nucleoplasm; F:1-phosphatidylinositol-3-kinase activity; P:lipoprotein catabolic process; P:heart development; P:somitogenesis; P:positive regulation of neuron apoptosis; P:mitotic cell cycle spindle assembly checkpoint; F:protein N-terminus binding; P:DNA damage response, signal transduction resulting in induction of apoptosis; C:cytoplasm; C:spindle; P:br…
ESTAGB1WB009003	P:cell cycle arrest; C:cytosol; F:calcium channel activity; C:membrane fraction; P:negative regulation of cell proliferation; C:Cul5-RING ubiquitin ligase complex; F:ubiquitin-protein ligase activity; P:response to osmotic stress; P:induction of apoptosis by intracellular signals; F:protein binding; F:vasopressin activated calcium mobilizing receptor activity; P:G1/S transition of mitotic cell cy…
ESTAGB1WB009006	P:compound eye development; P:cell-cell adhesion; C:intracellular; P:adherens junction maintenance; F:protein binding; F:zinc ion binding; P:regulation of MAPKKK cascade
ESTAGB1WB009009	F:microtubule motor activity; P:microtubule bundle formation; C:fusome; P:mitotic spindle organization; P:mitotic centrosome separation; P:plus-end directed microtubule sliding; P:Golgi organization; C:kinesin complex; P:protein homotetramerization; C:Golgi apparatus; C:endoplasmic reticulum; C:microtubule
ESTAGB1WB009021	P:nucleosome mobilization; F:metal ion binding; P:hemopoiesis; P:ecdysone receptor-mediated signaling pathway; P:nucleosome assembly; P:pupariation; F:ligand-dependent nuclear receptor binding; P:dendrite morphogenesis; P:transcription; C:NURF complex
ESTAGB1WB009034	P:muscle organ development; P:dendrite morphogenesis
ESTAGB1WB009039	P:growth; P:nematode larval development
ESTAGB1WB009041	P:organelle organization; P:negative regulation of insulin-like growth factor receptor signaling pathway; P:positive regulation of transcription from RNA polymerase II promoter; P:negative regulation of phosphorylation; F:protein binding; C:cytoplasm; F:chromatin binding; C:nucleus; C:chromatin
ESTAGB1WB009046	F:phosphopantetheine binding; P:fatty acid biosynthetic process; F:enoyl-[acyl-carrier-protein] reductase (NADPH, B-specific) activity; F:zinc ion binding; P:oxidation reduction; F:acyl carrier activity; F:[acyl-carrier-protein] S-malonyltransferase activity; F:oleoyl-[acyl-carrier-protein] hydrolase activity; F:3-hydroxypalmitoyl-[acyl-carrier-protein] dehydratase activity; F:3-oxoacyl-[acyl-car…
ESTAGB1WB009050	F:molecular_function; P:biological_process; C:cellular_component
ESTAGB1WB009054	F:transcription coactivator activity; P:regulation of transcription from RNA polymerase II promoter; F:RNA polymerase II transcription mediator activity; P:transcription initiation from RNA polymerase II promoter; C:transcription factor complex; P:positive regulation of transcription
ESTAGB1WB009055	C:cytoplasm; F:metal ion binding; P:phosphatidylinositol biosynthetic process; P:signal transduction; F:inositol-1(or 4)-monophosphatase activity; C:membrane; P:phosphate metabolic process; P:streptomycin biosynthetic process
ESTAGB1WB009065	C:mitochondrial matrix; F:iron ion binding; F:electron carrier activity; F:2 iron, 2 sulfur cluster binding; P:electron transport chain
ESTAGB1WB009068	F:transferase activity, transferring acyl groups other than amino-acyl groups
ESTAGB1WB009074	C:cytoplasm; P:embryonic cleavage; C:cleavage furrow; C:nucleus; C:microtubule
ESTAGB1WB009087	F:glucose transmembrane transporter activity; C:integral to membrane; F:substrate-specific transmembrane transporter activity; C:membrane; P:transmembrane transport; F:transporter activity; P:transport
ESTAGB1WB009090	P:primary metabolic process; P:chromosome organization; P:cellular biopolymer metabolic process; P:sexual reproduction; P:reproductive process
ESTAGB1WB009096	F:chloride ion binding; F:voltage-gated chloride channel activity; C:lysosome; F:protein binding; F:ATP binding; C:integral to membrane; F:antiporter activity; P:chloride transport
ESTAGB1WB009098	C:membrane; P:proteolysis; F:serine-type peptidase activity
ESTAGB1WB009117	P:rRNA methylation; F:nucleic acid binding; F:methyltransferase activity
ESTAGB1WB009119	F:binding
ESTAGB1WB009121	P:DNA fragmentation involved in apoptosis; C:nucleus
ESTAGB1WB009122	P:regulation of ARF GTPase activity; F:ARF GTPase activator activity; F:zinc ion binding
ESTAGB1WB009130	F:hydrolase activity, acting on glycosyl bonds; F:glycogen debranching enzyme activity; F:transferase activity; P:metabolic process
ESTAGB1WB009134	F:binding; P:regulation of transcription from RNA polymerase II promoter; F:ATP-dependent DNA helicase activity; C:replication fork
ESTAGB1WB009135	F:protein serine/threonine kinase activity; P:regulation of cell shape; P:regulation of cell cycle; P:histone phosphorylation; F:ATP binding; P:cell adhesion; F:protein binding; P:antimicrobial humoral response; P:mitotic cell cycle, embryonic; P:protein amino acid autophosphorylation; C:nucleus; P:serine family amino acid metabolic process
ESTAGB1WB009143	F:protein binding; F:kinase activity
ESTAGB1WB009147	P:transport
ESTAGB1WB009157	F:GTP binding; F:translation elongation factor activity; F:GTPase activity; F:nucleotide binding
ESTAGB1WB009161	C:cytoplasm; F:metallocarboxypeptidase activity; P:proteolysis; C:nucleus; F:zinc ion binding
ESTAGB1WB009166	C:integral to membrane
ESTAGB1WB009167	C:cytosol; P:mitotic sister chromatid segregation; P:negative regulation of ubiquitin-protein ligase activity during mitotic cell cycle; C:nucleolus; P:anaphase-promoting complex-dependent proteasomal ubiquitin-dependent protein catabolic process; C:kinetochore; F:protein binding; P:cell proliferation; P:mitotic cell cycle checkpoint
ESTAGB1WB009175	C:membrane; F:metal ion binding; P:metabolic process; F:catalytic activity; F:iron-sulfur cluster binding
ESTAGB1WB009186	P:steroid biosynthetic process; C:mitochondrial inner membrane; F:electron carrier activity; F:protein binding; C:mitochondrial matrix; P:transport; P:cholesterol metabolic process; F:ferredoxin-NADP+ reductase activity; P:electron transport chain; P:electron transport chain
ESTAGB1WB009191	F:mannosyltransferase activity; C:alpha-1,6-mannosyltransferase complex
ESTAGB1WB009203	P:negative regulation of transcription from RNA polymerase II promoter; F:protein binding; F:zinc ion binding; P:humoral immune response; C:cytoplasm; C:ubiquitin ligase complex; P:histone ubiquitination; P:brain development; C:nuclear body; F:ubiquitin-protein ligase activity; P:somatic stem cell division; P:rostrocaudal neural tube patterning; P:positive regulation of immature T cell proliferat…
ESTAGB1WB009205	F:receptor activity; C:plasma membrane; C:membrane part; C:synapse; F:ion channel activity; P:signal transduction; P:ion transport
ESTAGB1WB009207	P:cellular alcohol metabolic process; F:oxidoreductase activity, acting on CH-OH group of donors; F:FAD binding
ESTAGB1WB009211	F:hydrolase activity
ESTAGB1WB009215	P:phagocytosis, engulfment; C:NuA4 histone acetyltransferase complex
ESTAGB1WB009217	F:polydeoxyribonucleotide kinase activity; F:transition metal ion binding; P:mRNA 3'-end processing; F:ATP binding; P:RNA interference, siRNA loading onto RISC; F:ATP-dependent polyribonucleotide 5'-hydroxyl-kinase activity; P:nuclear mRNA splicing, via spliceosome; C:tRNA-intron endonuclease complex; P:RNA interference, targeting of mRNA for destruction; P:tRNA splicing, via endonucleolytic clea…
ESTAGB1WB009232	F:molecular_function; P:biological_process
ESTAGB1WB009235	F:binding; F:transferase activity
ESTAGB1WB009236	F:transferase activity; F:protein binding
ESTAGB1WB009257	F:Rac GTPase binding; C:basal part of cell; F:receptor activity; F:guanyl-nucleotide exchange factor activity; P:microtubule cytoskeleton organization; P:axonogenesis; C:growth cone; F:GTP binding; P:positive regulation of peptidyl-serine phosphorylation; P:establishment of neuroblast polarity; P:activation of Rac GTPase activity
ESTAGB1WB009259	F:mannosyl-oligosaccharide 1,2-alpha-mannosidase activity; F:calcium ion binding; P:ER-associated protein catabolic process; C:membrane; P:carbohydrate metabolic process
ESTAGB1WB009263	F:ATP binding; P:response to stress
ESTAGB1WB009267	F:transcription coactivator activity; C:nucleus
ESTAGB1WB009331	F:geranyltranstransferase activity; P:steroid biosynthetic process; P:terpenoid biosynthetic process
ESTAGB1WB009339	F:GTPase activity; F:GTP binding
ESTAGB1WB009362	F:glutamate-tRNA ligase activity; P:glutamyl-tRNA aminoacylation; F:ATP binding; C:glutamate-tRNA ligase complex; P:chlorophyll metabolic process
ESTAGB1WB009364	F:calmodulin binding; C:calcium- and calmodulin-dependent protein kinase complex; P:nucleocytoplasmic transport; F:ATP binding; P:nervous system development; P:cell differentiation; P:signal transduction; C:cytoplasm; F:calmodulin-dependent protein kinase activity; C:nucleus; P:protein amino acid phosphorylation; P:serine family amino acid metabolic process
ESTAGB1WB009366	C:lipid particle; C:membrane
ESTAGB1WB009370	P:proteolysis; F:serine-type endopeptidase activity; F:catalytic activity
ESTAGB1WB009372	F:guanyl-nucleotide exchange factor activity; P:regulation of cell shape; F:metal ion binding; P:actin filament organization; F:Rho GTPase activator activity; P:Rho protein signal transduction; C:intracellular; P:cell adhesion; P:regulation of GTPase activity
ESTAGB1WB009374	C:6-phosphofructokinase complex; F:6-phosphofructokinase activity; F:DNA binding; F:ATP binding; C:polytene chromosome; F:protein binding; P:glycolysis; P:chromatin remodeling; C:nucleus; P:fructose metabolic process; P:galactose metabolic process; P:mannose metabolic process; P:gluconeogenesis; P:pentose-phosphate shunt
ESTAGB1WB009375	P:organ development
ESTAGB1WB009390	P:cell redox homeostasis; C:cytoplasm; F:electron carrier activity; C:cell cortex; F:protein disulfide oxidoreductase activity; F:protein binding
ESTAGB1WB009391	F:metal ion binding; F:phosphatase activity
ESTAGB1WB009397	F:oxidoreductase activity; F:FAD binding
ESTAGB1WB009405	C:cell part
ESTAGB1WB009407	P:cytokinesis; P:muscle organ development; P:cytoskeleton organization; C:brahma complex; F:structural constituent of cytoskeleton; C:actin filament; F:transcription coactivator activity; P:dendrite morphogenesis; C:transcription factor complex; P:positive regulation of transcription
ESTAGB1WB009436	F:1-acylglycerophosphocholine O-acyltransferase activity; C:Golgi stack; P:platelet activating factor biosynthetic process; F:1-alkylglycerophosphocholine O-acetyltransferase activity; F:calcium ion binding; P:membrane organization; C:membrane; C:endoplasmic reticulum; P:acyl-carrier-protein biosynthetic process
ESTAGB1WB009454	C:membrane; F:cation transmembrane transporter activity; P:cation transport
ESTAGB1WB009455	F:binding; P:protein folding; F:chaperone binding; C:microtubule
ESTAGB1WB009457	F:receptor activity
ESTAGB1WB009463	C:cytosol; P:regulation of cell adhesion; F:heat shock protein binding; P:positive regulation of apoptosis; P:cytoplasmic sequestering of NF-kappaB; F:NF-kappaB binding; P:positive regulation of protein complex assembly; P:regulation of protein catabolic process; F:protein domain specific binding; F:protein kinase binding; C:perinuclear region of cytoplasm; C:nuclear envelope; C:transcription fac…
ESTAGB1WB009466	C:membrane
ESTAGB1WB009468	F:NAD+ ADP-ribosyltransferase activity; C:nucleus
ESTAGB1WB009469	F:Rho guanyl-nucleotide exchange factor activity; F:signal transducer activity; C:intracellular; F:protein binding; P:positive regulation of I-kappaB kinase/NF-kappaB cascade; P:regulation of Rho protein signal transduction; P:regulation of GTPase activity
ESTAGB1WB009517	F:nucleoside-triphosphatase activity; F:protein binding; F:nucleotide binding; P:signal transduction; C:cytoplasm
ESTAGB1WB009549	F:zinc ion binding; F:protein binding
ESTAGB1WB009551	F:transferase activity; P:isoprenoid biosynthetic process
ESTAGB1WB009556	P:negative regulation of DNA replication; C:nucleus
ESTAGB1WB009559	P:phagocytosis, engulfment
ESTAGB1WB009572	C:cytoplasm; P:protein complex assembly; C:cytoskeleton; C:catenin complex; F:beta-catenin binding; P:signal transduction
ESTAGB1WB009574	C:basolateral plasma membrane; P:embryonic development; C:apical plasma membrane; F:voltage-gated calcium channel activity; P:calcium ion transport; P:muscle contraction; F:calcium ion binding; P:epithelial fluid transport; C:voltage-gated calcium channel complex
ESTAGB1WB009582	F:translation elongation factor activity; F:GTP binding; C:mitochondrion; F:GTPase activity; C:ribosome; P:regulation of translational elongation
ESTAGB1WB009589	P:vesicle-mediated transport; P:chorion-containing eggshell formation; F:microtubule binding; F:zinc ion binding; P:karyosome formation; C:cell cortex; P:pole plasm oskar mRNA localization; F:actin binding; P:actin nucleation; C:tubulin complex
ESTAGB1WB009595	F:aminoacyl-tRNA ligase activity; P:tRNA aminoacylation for protein translation; F:nucleotide binding
ESTAGB1WB009609	P:peptide cross-linking; F:acyltransferase activity; F:transferase activity; F:protein-glutamine gamma-glutamyltransferase activity
ESTAGB1WB009621	C:protein complex; F:RNA binding; F:protein homodimerization activity; F:nucleotide binding
ESTAGB1WB009635	P:blood coagulation; P:embryonic forelimb morphogenesis; P:embryonic digit morphogenesis
ESTAGB1WB009638	F:cysteine-type peptidase activity; P:proteolysis
ESTAGB1WB009658	P:signal transduction
ESTAGB1WB009659	P:regulation of growth; P:histone H4 acetylation; P:histone H2A acetylation; P:regulation of transcription; P:proteolysis; C:NuA4 histone acetyltransferase complex; F:ATP binding; F:protein binding; P:signal transduction; F:aspartic-type endopeptidase activity; C:SWI/SNF complex; F:chromatin binding; P:chromatin remodeling; C:plasma membrane; C:chromatin
ESTAGB1WB009660	F:amylo-alpha-1,6-glucosidase activity; F:binding; F:transferase activity; C:cytosol; C:isoamylase complex; P:starch metabolic process; P:sucrose metabolic process
ESTAGB1WB009669	F:microtubule-severing ATPase activity; F:ATP binding
ESTAGB1WB009676	F:transferase activity
ESTAGB1WB009677	P:dephosphorylation; F:phosphatase activity
ESTAGB1WB009687	F:hydrolase activity, hydrolyzing O-glycosyl compounds; P:carbohydrate metabolic process; C:alpha-glucosidase II complex
ESTAGB1WB009691	F:methyltransferase activity; P:metabolic process
ESTAGB1WB009695	C:membrane
ESTAGB1WB009723	C:mitochondrial large ribosomal subunit; P:translation
ESTAGB1WB009725	F:phosphoinositide binding; P:metabolic process; P:cell communication; F:catalytic activity; F:protein binding
ESTAGB1WB009739	C:membrane; F:hydrolase activity, acting on glycosyl bonds; P:biological_process
ESTAGB1WB009744	F:chitinase activity; P:chitin catabolic process; F:cation binding; F:chitin binding; C:integral to membrane; C:extracellular region; P:cell wall macromolecule catabolic process
ESTAGB1WB009746	C:cell part
ESTAGB1WB009749	F:protein binding
ESTAGB1WB009754	P:carbohydrate metabolic process; F:hydrolase activity, acting on glycosyl bonds
ESTAGB1WB009758	P:positive regulation of growth rate; C:lateral plasma membrane; F:hydrolase activity, hydrolyzing O-glycosyl compounds; P:carbohydrate metabolic process; P:dorsal/ventral axon guidance; P:body morphogenesis; F:protein binding; P:positive regulation of locomotion; P:signal transduction; F:phospholipase A2 activity; P:positive regulation of multicellular organism growth; P:phospholipid catabolic p…
ESTAGB1WB009776	F:binding; F:ATP-dependent helicase activity; P:DNA repair
ESTAGB1WB009780	P:positive regulation of growth rate; P:embryonic development ending in birth or egg hatching; C:mitochondrion; C:large ribosomal subunit; P:nematode larval development
ESTAGB1WB009795	F:binding
ESTAGB1WB009797	P:steroid metabolic process; C:membrane; F:metallopeptidase activity
ESTAGB1WB009803	C:integral to membrane; C:mitochondrial inner membrane; F:ATPase activity, coupled to transmembrane movement of substances; P:heme transport; P:iron-sulfur cluster assembly; C:ATP-binding cassette (ABC) transporter complex; F:heme transporter activity; F:ATP binding
ESTAGB1WB009804	F:binding; C:nuclear cap binding complex; C:nucleus; P:nuclear mRNA splicing, via spliceosome
ESTAGB1WB009816	F:molecular_function; P:biological_process
ESTAGB1WB009823	F:GPI-anchor transamidase activity; F:protein binding; C:GPI-anchor transamidase complex; F:cysteine-type endopeptidase activity; P:proteolysis
ESTAGB1WB009827	F:heme binding; C:membrane; P:oxidation reduction; F:monooxygenase activity; F:electron carrier activity; P:electron transport chain
ESTAGB1WB009832	C:integral to membrane; C:membrane
ESTAGB1WB009833	F:binding
ESTAGB1WB009837	F:structural constituent of ribosome; C:mitochondrial large ribosomal subunit; P:ribosome biogenesis
ESTAGB1WB009848	P:protein amino acid phosphorylation; P:protein folding; C:chaperonin-containing T-complex; P:mitotic spindle organization; F:protein kinase activity; F:ATP binding; F:unfolded protein binding; F:ATPase activity, coupled
ESTAGB1WB009850	F:binding; C:lipid particle; C:mitochondrial envelope; P:transport; C:membrane; F:transporter activity
ESTAGB1WB009859	F:oxidoreductase activity
ESTAGB1WB009860	P:modification-dependent protein catabolic process; C:nucleus
ESTAGB1WB009868	P:DNA replication; F:DNA-directed RNA polymerase activity; C:nucleolus; P:purine base metabolic process; P:pyrimidine base metabolic process; P:transcription, DNA-dependent
ESTAGB1WB009870	F:myosin heavy chain kinase activity; C:cytoplasm; C:nucleus; F:microtubule binding; P:serine family amino acid metabolic process; P:phosphorylation; C:myosin complex; C:tubulin complex
ESTAGB1WB009879	C:endoplasmic reticulum membrane; P:GPI anchor biosynthetic process; C:integral to membrane; P:cell division
ESTAGB1WB009884	F:binding; P:cellular hormone metabolic process; P:oxidation reduction; F:steroid dehydrogenase activity, acting on the CH-OH group of donors, NAD or NADP as acceptor; P:steroid metabolic process; P:fatty acid metabolic process
ESTAGB1WB009885	F:protein binding
ESTAGB1WB009886	F:metal ion binding; P:pyrimidine nucleotide metabolic process; F:dCMP deaminase activity; C:cytosol; P:pyrimidine base metabolic process
ESTAGB1WB009897	F:metal ion binding
ESTAGB1WB009903	F:hydrolase activity; F:binding
ESTAGB1WB009906	C:integral to membrane; C:membrane
ESTAGB1WB009950	P:proteolysis; P:regulation of catalytic activity; F:cysteine-type endopeptidase activity
ESTAGB1WB009965	F:binding; F:transferase activity
ESTAGB1WB009967	P:nuclear-transcribed mRNA catabolic process, deadenylation-dependent decay; F:RNA binding; C:mitochondrion; F:enoyl-CoA hydratase activity; P:isoleucine catabolic process; P:leucine catabolic process; P:lysine catabolic process; P:tryptophan metabolic process; P:valine catabolic process; P:fatty acid biosynthetic process; P:benzoate metabolic process; P:beta-alanine metabolic process; P:limonene…
ESTAGB1WB009975	P:synaptic vesicle targeting; P:regulation of cell shape; P:establishment or maintenance of cell polarity; P:synaptic vesicle docking during exocytosis; C:calcium- and calmodulin-dependent protein kinase complex; F:guanylate kinase activity; F:ATP binding; P:cell adhesion; F:protein binding; P:adult walking behavior; F:calmodulin-dependent protein kinase activity; C:membrane; P:protein amino acid…
ESTAGB1WB009988	F:calcium ion binding
ESTAGB1WB009991	P:transport
ESTAGB1WB009993	P:biological_process; F:protein binding
ESTAGB1WB010012	P:vesicle-mediated transport; F:protein transporter activity; P:positive regulation of NK T cell differentiation; C:membrane coat; F:protein binding; P:intracellular protein transport; P:antigen processing and presentation, exogenous lipid antigen via MHC class Ib; P:eye pigment biosynthetic process; C:Golgi apparatus
ESTAGB1WB010016	F:oxidoreductase activity; C:cytoplasm; P:metabolic process; F:monooxygenase activity
ESTAGB1WB010042	F:peptidase activity, acting on L-amino acid peptides
ESTAGB1WB010043	P:metabolic process; F:catalytic activity
ESTAGB1WB010046	F:binding
ESTAGB1WB010067	P:nucleobase, nucleoside, nucleotide and nucleic acid metabolic process; F:DNA binding; F:ATP-dependent DNA helicase activity; F:ATP binding; C:nucleus; C:replication fork
ESTAGB1WB010080	P:regulation of transcription; F:transcription regulator activity; C:nucleus
ESTAGB1WB010084	F:binding
ESTAGB1WB010099	F:transcription coactivator activity; P:embryonic development via the syncytial blastoderm; F:NAD or NADH binding; F:oxidoreductase activity, acting on the CH-OH group of donors, NAD or NADP as acceptor; P:Wnt receptor signaling pathway; C:transcription factor complex; P:positive regulation of transcription
ESTAGB1WB010100	F:transferase activity
ESTAGB1WB010104	P:cellular process; F:protein binding
ESTAGB1WB010139	F:molecular_function; P:biological_process; C:nuclear envelope; C:cellular_component
ESTAGB1WB010152	P:neuron migration; P:retrograde axon cargo transport; P:activation of Cdc42 GTPase activity; C:neurofilament cytoskeleton; P:nuclear envelope disassembly; P:neurofilament cytoskeleton organization; P:inner cell mass cell proliferation; C:cell leading edge; P:vesicle transport along microtubule; F:microtubule binding; F:alpha-tubulin binding; C:nuclear envelope; C:centrosome; P:chromosome segrega…
ESTAGB1WB010153	F:nuclease activity
ESTAGB1WB010161	P:cGMP metabolic process; P:cAMP metabolic process; P:signal transduction; F:3',5'-cyclic-AMP phosphodiesterase activity; F:3',5'-cyclic-GMP phosphodiesterase activity
ESTAGB1WB010174	F:molecular_function; C:cellular_component
ESTAGB1WB010185	C:cytoplasm; F:actin binding; C:cytoskeleton; F:protein binding
ESTAGB1WB010190	F:lysozyme activity; P:carbohydrate metabolic process
ESTAGB1WB010196	C:viral capsid
ESTAGB1WB010198	F:nucleotide binding; F:aminoacyl-tRNA ligase activity; P:tRNA aminoacylation for protein translation
ESTAGB1WB010199	F:nucleoside-triphosphatase activity; C:membrane; F:nucleotide binding
ESTAGB1WB010203	P:proteolysis; F:metallocarboxypeptidase activity; C:cytoplasm; F:zinc ion binding; C:nucleus
ESTAGB1WB010210	P:regulation of locomotion; P:adult behavior; F:tubulin-tyrosine ligase activity; P:protein modification process; P:tyrosine metabolic process
ESTAGB1WB010217	F:cysteine-type endopeptidase activity; P:proteolysis
ESTAGB1WB010228	F:hydrolase activity, acting on ester bonds; F:acyltransferase activity; F:phosphopantetheine binding; P:oxidation reduction; F:acyl carrier activity; F:oxidoreductase activity; F:cofactor binding; F:zinc ion binding; P:acyl-carrier-protein biosynthetic process; P:transport
ESTAGB1WB010250	C:integral to membrane; F:ATPase activity; F:ATP binding; F:pigment binding; P:transport
ESTAGB1WB010263	C:nucleoplasm; F:mRNA (guanine-N7-)-methyltransferase activity; P:mRNA capping; F:RNA binding; P:RNA modification
ESTAGB1WB010265	C:membrane; F:transmembrane transporter activity
[truncated: 1,031 more rows]
