# Supplementary material for: Combining Next-Generation Sequencing Strategies for Rapid Molecular Resource Development from an Invasive Aphid Species, Aphis glycines
Source: PLoS One. 2010 Jun 29;5(6):e11370. doi: 10.1371/journal.pone.0011370 (PMC2894077; doi:10.1371/journal.pone.0011370)
Supplement: Table S2 — Metabolic pathways for Aphis glycines B1 transcript sequences in Kyoto Encyclopedia of Genes and Genome (KEGG) (0.06 MB XLS) [file pone.0011370.s003.xls]

## Sheet: KEGG
KEGG pathway name	KEGG pathway map ID	Number of A. glycines B1 transcripts	A. glycines B1 transcript IDs
Glycolysis / Gluconeogenesis	map00010	27	ESTAGB1WB000124; ESTAGB1WB000137; ESTAGB1WB001273; ESTAGB1WB001971; ESTAGB1WB002338; ESTAGB1WB002465; ESTAGB1WB003036; ESTAGB1WB003347; ESTAGB1WB003916; ESTAGB1WB003967; ESTAGB1WB003986; ESTAGB1WB004146; ESTAGB1WB004199; ESTAGB1WB004313; ESTAGB1WB004342; ESTAGB1WB004994; ESTAGB1WB005912; ESTAGB1WB005936; ESTAGB1WB006180; ESTAGB1WB006200; ESTAGB1WB006754; ESTAGB1WB007798; ESTAGB1WB007925; ESTAGB1W…
Citrate cycle (TCA cycle)	map00020	37	ESTAGB1WB000073; ESTAGB1WB000124; ESTAGB1WB000151; ESTAGB1WB000216; ESTAGB1WB000228; ESTAGB1WB000428; ESTAGB1WB002465; ESTAGB1WB002485; ESTAGB1WB002486; ESTAGB1WB002530; ESTAGB1WB003369; ESTAGB1WB003427; ESTAGB1WB003585; ESTAGB1WB003588; ESTAGB1WB005120; ESTAGB1WB005341; ESTAGB1WB005388; ESTAGB1WB005593; ESTAGB1WB005912; ESTAGB1WB006200; ESTAGB1WB006275; ESTAGB1WB006620; ESTAGB1WB006705; ESTAGB1W…
Pentose phosphate pathway	map00030	22	ESTAGB1WB000026; ESTAGB1WB000137; ESTAGB1WB000473; ESTAGB1WB002083; ESTAGB1WB002387; ESTAGB1WB002595; ESTAGB1WB003347; ESTAGB1WB003914; ESTAGB1WB003986; ESTAGB1WB004199; ESTAGB1WB004591; ESTAGB1WB004761; ESTAGB1WB004990; ESTAGB1WB005867; ESTAGB1WB007005; ESTAGB1WB007652; ESTAGB1WB007770; ESTAGB1WB007940; ESTAGB1WB008094; ESTAGB1WB008828; ESTAGB1WB009374; ESTAGB1WB014093
Pentose and glucuronate interconversions	map00040	9	ESTAGB1WB002349; ESTAGB1WB003055; ESTAGB1WB003073; ESTAGB1WB004990; ESTAGB1WB007109; ESTAGB1WB007652; ESTAGB1WB008914; ESTAGB1WB011117; ESTAGB1WB015901
Fructose and mannose metabolism	map00051	12	ESTAGB1WB000137; ESTAGB1WB003055; ESTAGB1WB003347; ESTAGB1WB003703; ESTAGB1WB003986; ESTAGB1WB005088; ESTAGB1WB005936; ESTAGB1WB007592; ESTAGB1WB009374; ESTAGB1WB012165; ESTAGB1WB014068; ESTAGB1WB016276
Galactose metabolism	map00052	8	ESTAGB1WB000137; ESTAGB1WB003055; ESTAGB1WB003587; ESTAGB1WB003672; ESTAGB1WB005703; ESTAGB1WB008828; ESTAGB1WB009374; ESTAGB1WB017390
Ascorbate and aldarate metabolism	map00053	9	ESTAGB1WB001273; ESTAGB1WB001822; ESTAGB1WB002349; ESTAGB1WB003073; ESTAGB1WB005591; ESTAGB1WB006326; ESTAGB1WB006754; ESTAGB1WB006832; ESTAGB1WB011117
Fatty acid biosynthesis	map00061	8	ESTAGB1WB003435; ESTAGB1WB004401; ESTAGB1WB005021; ESTAGB1WB005064; ESTAGB1WB008843; ESTAGB1WB009046; ESTAGB1WB013744; ESTAGB1WB014020
Fatty acid elongation in mitochondria	map00062	8	ESTAGB1WB000579; ESTAGB1WB000955; ESTAGB1WB001468; ESTAGB1WB004280; ESTAGB1WB009967; ESTAGB1WB012862; ESTAGB1WB013591; ESTAGB1WB016429
Fatty acid metabolism	map00071	19	ESTAGB1WB000579; ESTAGB1WB000780; ESTAGB1WB001247; ESTAGB1WB001273; ESTAGB1WB001468; ESTAGB1WB001720; ESTAGB1WB002062; ESTAGB1WB003865; ESTAGB1WB004280; ESTAGB1WB005178; ESTAGB1WB006754; ESTAGB1WB006990; ESTAGB1WB007440; ESTAGB1WB008464; ESTAGB1WB009967; ESTAGB1WB012862; ESTAGB1WB013591; ESTAGB1WB015408; ESTAGB1WB016429
Synthesis and degradation of ketone bodies	map00072	5	ESTAGB1WB000407; ESTAGB1WB005178; ESTAGB1WB007440; ESTAGB1WB010368; ESTAGB1WB015707
Primary bile acid biosynthesis	map00120	5	ESTAGB1WB000579; ESTAGB1WB001468; ESTAGB1WB004280; ESTAGB1WB013591; ESTAGB1WB016068
Androgen and estrogen metabolism	map00150	5	ESTAGB1WB002349; ESTAGB1WB003073; ESTAGB1WB006082; ESTAGB1WB011117; ESTAGB1WB013591
Oxidative phosphorylation	map00190	59	ESTAGB1WB000069; ESTAGB1WB000119; ESTAGB1WB000134; ESTAGB1WB000149; ESTAGB1WB000178; ESTAGB1WB000267; ESTAGB1WB000495; ESTAGB1WB000511; ESTAGB1WB000540; ESTAGB1WB001174; ESTAGB1WB001285; ESTAGB1WB002017; ESTAGB1WB002106; ESTAGB1WB002483; ESTAGB1WB003432; ESTAGB1WB003498; ESTAGB1WB003773; ESTAGB1WB003781; ESTAGB1WB003910; ESTAGB1WB004001; ESTAGB1WB004052; ESTAGB1WB004073; ESTAGB1WB004082; ESTAGB1W…
Photosynthesis	map00195	14	ESTAGB1WB000267; ESTAGB1WB003773; ESTAGB1WB003781; ESTAGB1WB003910; ESTAGB1WB004001; ESTAGB1WB004166; ESTAGB1WB004260; ESTAGB1WB004343; ESTAGB1WB004655; ESTAGB1WB006696; ESTAGB1WB007992; ESTAGB1WB009186; ESTAGB1WB013789; ESTAGB1WB017421
Purine metabolism	map00230	101	ESTAGB1WB000181; ESTAGB1WB000375; ESTAGB1WB000378; ESTAGB1WB000390; ESTAGB1WB000473; ESTAGB1WB000614; ESTAGB1WB000741; ESTAGB1WB000915; ESTAGB1WB001062; ESTAGB1WB001125; ESTAGB1WB001201; ESTAGB1WB001519; ESTAGB1WB001557; ESTAGB1WB001708; ESTAGB1WB001802; ESTAGB1WB002339; ESTAGB1WB002540; ESTAGB1WB002595; ESTAGB1WB003038; ESTAGB1WB003489; ESTAGB1WB003828; ESTAGB1WB003916; ESTAGB1WB004130; ESTAGB1W…
Pyrimidine metabolism	map00240	61	ESTAGB1WB000181; ESTAGB1WB000375; ESTAGB1WB000378; ESTAGB1WB000741; ESTAGB1WB000853; ESTAGB1WB001178; ESTAGB1WB001201; ESTAGB1WB001263; ESTAGB1WB001519; ESTAGB1WB001557; ESTAGB1WB001741; ESTAGB1WB001802; ESTAGB1WB001902; ESTAGB1WB002101; ESTAGB1WB002169; ESTAGB1WB002339; ESTAGB1WB002897; ESTAGB1WB002898; ESTAGB1WB003038; ESTAGB1WB003494; ESTAGB1WB004351; ESTAGB1WB005044; ESTAGB1WB005380; ESTAGB1W…
Alanine, aspartate and glutamate metabolism	map00250	17	ESTAGB1WB000111; ESTAGB1WB000139; ESTAGB1WB001905; ESTAGB1WB004133; ESTAGB1WB004212; ESTAGB1WB005119; ESTAGB1WB006961; ESTAGB1WB007496; ESTAGB1WB012900; ESTAGB1WB013583; ESTAGB1WB013800; ESTAGB1WB015989; ESTAGB1WB016225; ESTAGB1WB016590; ESTAGB1WB016986; ESTAGB1WB017156; ESTAGB1WB017752
Tetracycline biosynthesis	map00253	1	ESTAGB1WB005064
Glycine, serine and threonine metabolism	map00260	12	ESTAGB1WB004675; ESTAGB1WB005259; ESTAGB1WB005267; ESTAGB1WB005324; ESTAGB1WB005823; ESTAGB1WB006329; ESTAGB1WB007798; ESTAGB1WB007925; ESTAGB1WB008370; ESTAGB1WB008582; ESTAGB1WB016912; ESTAGB1WB018410
Cysteine and methionine metabolism	map00270	10	ESTAGB1WB001237; ESTAGB1WB003543; ESTAGB1WB003888; ESTAGB1WB003906; ESTAGB1WB004737; ESTAGB1WB007027; ESTAGB1WB007496; ESTAGB1WB012900; ESTAGB1WB013875; ESTAGB1WB016986
Valine, leucine and isoleucine degradation	map00280	26	ESTAGB1WB000407; ESTAGB1WB000579; ESTAGB1WB000780; ESTAGB1WB001273; ESTAGB1WB001468; ESTAGB1WB001720; ESTAGB1WB003865; ESTAGB1WB004280; ESTAGB1WB005178; ESTAGB1WB005893; ESTAGB1WB006269; ESTAGB1WB006754; ESTAGB1WB006990; ESTAGB1WB007440; ESTAGB1WB007798; ESTAGB1WB007925; ESTAGB1WB008464; ESTAGB1WB008672; ESTAGB1WB009967; ESTAGB1WB010368; ESTAGB1WB013591; ESTAGB1WB013744; ESTAGB1WB014093; ESTAGB1W…
Geraniol degradation	map00281	5	ESTAGB1WB000579; ESTAGB1WB001468; ESTAGB1WB004280; ESTAGB1WB009967; ESTAGB1WB013591
Valine, leucine and isoleucine biosynthesis	map00290	7	ESTAGB1WB000124; ESTAGB1WB001426; ESTAGB1WB002465; ESTAGB1WB005912; ESTAGB1WB009209; ESTAGB1WB011342; ESTAGB1WB012222
Lysine biosynthesis	map00300	2	ESTAGB1WB007494; ESTAGB1WB012728
Lysine degradation	map00310	19	ESTAGB1WB000579; ESTAGB1WB001273; ESTAGB1WB001468; ESTAGB1WB002062; ESTAGB1WB002686; ESTAGB1WB003496; ESTAGB1WB004280; ESTAGB1WB005120; ESTAGB1WB005153; ESTAGB1WB005178; ESTAGB1WB006754; ESTAGB1WB007440; ESTAGB1WB007494; ESTAGB1WB009967; ESTAGB1WB010712; ESTAGB1WB012031; ESTAGB1WB013591; ESTAGB1WB014026; ESTAGB1WB016190
Penicillin and cephalosporin biosynthesis	map00311	2	ESTAGB1WB008370; ESTAGB1WB015160
Arginine and proline metabolism	map00330	22	ESTAGB1WB000040; ESTAGB1WB000139; ESTAGB1WB000183; ESTAGB1WB001273; ESTAGB1WB002401; ESTAGB1WB002614; ESTAGB1WB002871; ESTAGB1WB003906; ESTAGB1WB004424; ESTAGB1WB004737; ESTAGB1WB004944; ESTAGB1WB005119; ESTAGB1WB005447; ESTAGB1WB006754; ESTAGB1WB007496; ESTAGB1WB007520; ESTAGB1WB008370; ESTAGB1WB011015; ESTAGB1WB011227; ESTAGB1WB011606; ESTAGB1WB012900; ESTAGB1WB017156
Histidine metabolism	map00340	5	ESTAGB1WB001273; ESTAGB1WB003967; ESTAGB1WB004342; ESTAGB1WB006754; ESTAGB1WB014149
Tyrosine metabolism	map00350	13	ESTAGB1WB003967; ESTAGB1WB004342; ESTAGB1WB004430; ESTAGB1WB005162; ESTAGB1WB006754; ESTAGB1WB007496; ESTAGB1WB007557; ESTAGB1WB008228; ESTAGB1WB008392; ESTAGB1WB008605; ESTAGB1WB012900; ESTAGB1WB013583; ESTAGB1WB014149
Phenylalanine metabolism	map00360	13	ESTAGB1WB001018; ESTAGB1WB001287; ESTAGB1WB001329; ESTAGB1WB003549; ESTAGB1WB003967; ESTAGB1WB004342; ESTAGB1WB004672; ESTAGB1WB006754; ESTAGB1WB007030; ESTAGB1WB007496; ESTAGB1WB012900; ESTAGB1WB013813; ESTAGB1WB014149
gamma-Hexachlorocyclohexane degradation	map00361	2	ESTAGB1WB012106; ESTAGB1WB018776
Benzoate degradation via hydroxylation	map00362	1	ESTAGB1WB000579
Tryptophan metabolism	map00380	14	ESTAGB1WB000579; ESTAGB1WB001273; ESTAGB1WB001468; ESTAGB1WB002062; ESTAGB1WB004280; ESTAGB1WB005120; ESTAGB1WB005178; ESTAGB1WB005579; ESTAGB1WB006754; ESTAGB1WB007440; ESTAGB1WB009967; ESTAGB1WB010712; ESTAGB1WB013591; ESTAGB1WB016190
Phenylalanine, tyrosine and tryptophan biosynthesis	map00400	2	ESTAGB1WB007496; ESTAGB1WB012900
Novobiocin biosynthesis	map00401	2	ESTAGB1WB007496; ESTAGB1WB012900
beta-Alanine metabolism	map00410	16	ESTAGB1WB000111; ESTAGB1WB000579; ESTAGB1WB000780; ESTAGB1WB001273; ESTAGB1WB001720; ESTAGB1WB002169; ESTAGB1WB002897; ESTAGB1WB002898; ESTAGB1WB003865; ESTAGB1WB003906; ESTAGB1WB005893; ESTAGB1WB006269; ESTAGB1WB006754; ESTAGB1WB006990; ESTAGB1WB008464; ESTAGB1WB009967
Taurine and hypotaurine metabolism	map00430	1	ESTAGB1WB000111
Phosphonate and phosphinate metabolism	map00440	1	ESTAGB1WB017100
Selenoamino acid metabolism	map00450	7	ESTAGB1WB001583; ESTAGB1WB003543; ESTAGB1WB003888; ESTAGB1WB004288; ESTAGB1WB005840; ESTAGB1WB007809; ESTAGB1WB013875
Cyanoamino acid metabolism	map00460	4	ESTAGB1WB001091; ESTAGB1WB001905; ESTAGB1WB005324; ESTAGB1WB016590
D-Glutamine and D-glutamate metabolism	map00471	1	ESTAGB1WB017156
D-Arginine and D-ornithine metabolism	map00472	1	ESTAGB1WB008370
Glutathione metabolism	map00480	24	ESTAGB1WB000228; ESTAGB1WB001802; ESTAGB1WB001925; ESTAGB1WB002530; ESTAGB1WB002801; ESTAGB1WB002802; ESTAGB1WB003588; ESTAGB1WB003906; ESTAGB1WB004424; ESTAGB1WB004591; ESTAGB1WB005591; ESTAGB1WB006371; ESTAGB1WB006832; ESTAGB1WB006850; ESTAGB1WB007005; ESTAGB1WB007209; ESTAGB1WB008108; ESTAGB1WB009136; ESTAGB1WB012934; ESTAGB1WB013531; ESTAGB1WB014093; ESTAGB1WB014638; ESTAGB1WB015072; ESTAGB1W…
Starch and sucrose metabolism	map00500	15	ESTAGB1WB001091; ESTAGB1WB002303; ESTAGB1WB002349; ESTAGB1WB003073; ESTAGB1WB003672; ESTAGB1WB004199; ESTAGB1WB007109; ESTAGB1WB008828; ESTAGB1WB009660; ESTAGB1WB010087; ESTAGB1WB011117; ESTAGB1WB015901; ESTAGB1WB017100; ESTAGB1WB017390; ESTAGB1WB017834
N-Glycan biosynthesis	map00510	8	ESTAGB1WB003970; ESTAGB1WB004067; ESTAGB1WB005470; ESTAGB1WB009259; ESTAGB1WB009720; ESTAGB1WB011066; ESTAGB1WB012847; ESTAGB1WB014680
Other glycan degradation	map00511	1	ESTAGB1WB001091
O-Glycan biosynthesis	map00512	1	ESTAGB1WB011502
High-mannose type N-glycan biosynthesis	map00513	1	ESTAGB1WB009259
O-Mannosyl glycan biosynthesis	map00514	2	ESTAGB1WB003970; ESTAGB1WB014509
Amino sugar and nucleotide sugar metabolism	map00520	19	ESTAGB1WB000141; ESTAGB1WB000497; ESTAGB1WB001053; ESTAGB1WB002476; ESTAGB1WB003587; ESTAGB1WB004212; ESTAGB1WB005703; ESTAGB1WB005755; ESTAGB1WB005915; ESTAGB1WB007592; ESTAGB1WB008828; ESTAGB1WB009128; ESTAGB1WB009744; ESTAGB1WB010087; ESTAGB1WB010593; ESTAGB1WB012165; ESTAGB1WB014068; ESTAGB1WB016225; ESTAGB1WB016276
Streptomycin biosynthesis	map00521	4	ESTAGB1WB003912; ESTAGB1WB008828; ESTAGB1WB009055; ESTAGB1WB016174
Glycosaminoglycan degradation	map00531	3	ESTAGB1WB006386; ESTAGB1WB007109; ESTAGB1WB015901
Chondroitin sulfate biosynthesis	map00532	1	ESTAGB1WB013042
Heparan sulfate biosynthesis	map00534	3	ESTAGB1WB007142; ESTAGB1WB013042; ESTAGB1WB017084
Glycerolipid metabolism	map00561	9	ESTAGB1WB001273; ESTAGB1WB003055; ESTAGB1WB003520; ESTAGB1WB006754; ESTAGB1WB011337; ESTAGB1WB011344; ESTAGB1WB015785; ESTAGB1WB018109; ESTAGB1WB018335
Inositol phosphate metabolism	map00562	22	ESTAGB1WB000980; ESTAGB1WB001751; ESTAGB1WB001811; ESTAGB1WB001822; ESTAGB1WB003912; ESTAGB1WB003998; ESTAGB1WB005554; ESTAGB1WB005893; ESTAGB1WB005936; ESTAGB1WB006269; ESTAGB1WB006326; ESTAGB1WB006638; ESTAGB1WB007182; ESTAGB1WB007347; ESTAGB1WB008319; ESTAGB1WB008996; ESTAGB1WB009055; ESTAGB1WB010401; ESTAGB1WB011185; ESTAGB1WB016174; ESTAGB1WB018582; ESTAGB1WB018591
Glycerophospholipid metabolism	map00564	15	ESTAGB1WB003520; ESTAGB1WB003541; ESTAGB1WB007182; ESTAGB1WB007414; ESTAGB1WB008438; ESTAGB1WB008517; ESTAGB1WB009436; ESTAGB1WB009721; ESTAGB1WB009758; ESTAGB1WB010669; ESTAGB1WB015056; ESTAGB1WB015498; ESTAGB1WB015785; ESTAGB1WB017100; ESTAGB1WB018079
Ether lipid metabolism	map00565	5	ESTAGB1WB003690; ESTAGB1WB008517; ESTAGB1WB009436; ESTAGB1WB009721; ESTAGB1WB009758
Arachidonic acid metabolism	map00590	9	ESTAGB1WB000258; ESTAGB1WB001925; ESTAGB1WB002199; ESTAGB1WB002801; ESTAGB1WB005467; ESTAGB1WB006850; ESTAGB1WB008517; ESTAGB1WB009721; ESTAGB1WB009758
Linoleic acid metabolism	map00591	3	ESTAGB1WB008517; ESTAGB1WB009721; ESTAGB1WB009758
alpha-Linolenic acid metabolism	map00592	6	ESTAGB1WB000579; ESTAGB1WB006990; ESTAGB1WB008517; ESTAGB1WB009721; ESTAGB1WB009758; ESTAGB1WB009967
Sphingolipid metabolism	map00600	14	ESTAGB1WB000008; ESTAGB1WB000061; ESTAGB1WB001091; ESTAGB1WB001786; ESTAGB1WB002369; ESTAGB1WB002422; ESTAGB1WB003885; ESTAGB1WB004218; ESTAGB1WB004833; ESTAGB1WB005105; ESTAGB1WB005657; ESTAGB1WB014732; ESTAGB1WB016142; ESTAGB1WB017415
Pyruvate metabolism	map00620	19	ESTAGB1WB000073; ESTAGB1WB000124; ESTAGB1WB001273; ESTAGB1WB002465; ESTAGB1WB003055; ESTAGB1WB003585; ESTAGB1WB003916; ESTAGB1WB005064; ESTAGB1WB005178; ESTAGB1WB005912; ESTAGB1WB006200; ESTAGB1WB006754; ESTAGB1WB007440; ESTAGB1WB007615; ESTAGB1WB007798; ESTAGB1WB007925; ESTAGB1WB010661; ESTAGB1WB011869; ESTAGB1WB016089
Glyoxylate and dicarboxylate metabolism	map00630	7	ESTAGB1WB000073; ESTAGB1WB000428; ESTAGB1WB003427; ESTAGB1WB007152; ESTAGB1WB007382; ESTAGB1WB007615; ESTAGB1WB008028
1,2-Dichloroethane degradation	map00631	2	ESTAGB1WB001273; ESTAGB1WB006754
Benzoate degradation via CoA ligation	map00632	9	ESTAGB1WB000579; ESTAGB1WB001468; ESTAGB1WB002062; ESTAGB1WB004280; ESTAGB1WB005178; ESTAGB1WB006620; ESTAGB1WB007440; ESTAGB1WB009967; ESTAGB1WB013591
Propanoate metabolism	map00640	21	ESTAGB1WB000216; ESTAGB1WB000579; ESTAGB1WB000780; ESTAGB1WB001273; ESTAGB1WB001720; ESTAGB1WB003369; ESTAGB1WB003865; ESTAGB1WB005064; ESTAGB1WB005178; ESTAGB1WB005341; ESTAGB1WB005593; ESTAGB1WB005893; ESTAGB1WB006269; ESTAGB1WB006275; ESTAGB1WB006754; ESTAGB1WB006990; ESTAGB1WB007440; ESTAGB1WB008464; ESTAGB1WB009967; ESTAGB1WB014513; ESTAGB1WB018115
3-Chloroacrylic acid degradation	map00641	2	ESTAGB1WB001273; ESTAGB1WB006754
Ethylbenzene degradation	map00642	1	ESTAGB1WB000579
Styrene degradation	map00643	2	ESTAGB1WB005162; ESTAGB1WB008228
Butanoate metabolism	map00650	20	ESTAGB1WB000111; ESTAGB1WB000124; ESTAGB1WB000407; ESTAGB1WB000579; ESTAGB1WB001273; ESTAGB1WB001468; ESTAGB1WB002465; ESTAGB1WB004280; ESTAGB1WB005178; ESTAGB1WB005912; ESTAGB1WB006620; ESTAGB1WB006754; ESTAGB1WB007440; ESTAGB1WB009967; ESTAGB1WB010368; ESTAGB1WB013583; ESTAGB1WB013591; ESTAGB1WB015408; ESTAGB1WB015707; ESTAGB1WB015989
C5-Branched dibasic acid metabolism	map00660	5	ESTAGB1WB000216; ESTAGB1WB003369; ESTAGB1WB005341; ESTAGB1WB005593; ESTAGB1WB006275
One carbon pool by folate	map00670	8	ESTAGB1WB005259; ESTAGB1WB005324; ESTAGB1WB005863; ESTAGB1WB012757; ESTAGB1WB014828; ESTAGB1WB015898; ESTAGB1WB016912; ESTAGB1WB018410
Methane metabolism	map00680	9	ESTAGB1WB001018; ESTAGB1WB001287; ESTAGB1WB001329; ESTAGB1WB003549; ESTAGB1WB004672; ESTAGB1WB005324; ESTAGB1WB007030; ESTAGB1WB010852; ESTAGB1WB013813
Carbon fixation in photosynthetic organisms	map00710	15	ESTAGB1WB000073; ESTAGB1WB002083; ESTAGB1WB003347; ESTAGB1WB003916; ESTAGB1WB003986; ESTAGB1WB004990; ESTAGB1WB004994; ESTAGB1WB005867; ESTAGB1WB005936; ESTAGB1WB006180; ESTAGB1WB007496; ESTAGB1WB007615; ESTAGB1WB007652; ESTAGB1WB012900; ESTAGB1WB016986
Reductive carboxylate cycle (CO2 fixation)	map00720	17	ESTAGB1WB000073; ESTAGB1WB000216; ESTAGB1WB000228; ESTAGB1WB000428; ESTAGB1WB002530; ESTAGB1WB003369; ESTAGB1WB003588; ESTAGB1WB005341; ESTAGB1WB005593; ESTAGB1WB006275; ESTAGB1WB006620; ESTAGB1WB006705; ESTAGB1WB007152; ESTAGB1WB007382; ESTAGB1WB007615; ESTAGB1WB008028; ESTAGB1WB015180
Thiamine metabolism	map00730	28	ESTAGB1WB000614; ESTAGB1WB000915; ESTAGB1WB001062; ESTAGB1WB001708; ESTAGB1WB002540; ESTAGB1WB004458; ESTAGB1WB004503; ESTAGB1WB004887; ESTAGB1WB005546; ESTAGB1WB005939; ESTAGB1WB006634; ESTAGB1WB006779; ESTAGB1WB008729; ESTAGB1WB008738; ESTAGB1WB008777; ESTAGB1WB008915; ESTAGB1WB008947; ESTAGB1WB009517; ESTAGB1WB010199; ESTAGB1WB011152; ESTAGB1WB011387; ESTAGB1WB011937; ESTAGB1WB012891; ESTAGB1W…
Riboflavin metabolism	map00740	4	ESTAGB1WB001705; ESTAGB1WB004998; ESTAGB1WB008191; ESTAGB1WB014212
Vitamin B6 metabolism	map00750	1	ESTAGB1WB008582
Nicotinate and nicotinamide metabolism	map00760	4	ESTAGB1WB009105; ESTAGB1WB010735; ESTAGB1WB016660; ESTAGB1WB018317
Pantothenate and CoA biosynthesis	map00770	9	ESTAGB1WB000111; ESTAGB1WB001222; ESTAGB1WB002169; ESTAGB1WB002897; ESTAGB1WB002898; ESTAGB1WB007488; ESTAGB1WB008839; ESTAGB1WB013553; ESTAGB1WB017887
Lipoic acid metabolism	map00785	1	ESTAGB1WB014034
Folate biosynthesis	map00790	3	ESTAGB1WB004614; ESTAGB1WB012106; ESTAGB1WB018776
Retinol metabolism	map00830	4	ESTAGB1WB002349; ESTAGB1WB003073; ESTAGB1WB003967; ESTAGB1WB011117
Porphyrin and chlorophyll metabolism	map00860	20	ESTAGB1WB000691; ESTAGB1WB002065; ESTAGB1WB002349; ESTAGB1WB003073; ESTAGB1WB004778; ESTAGB1WB005398; ESTAGB1WB005823; ESTAGB1WB006329; ESTAGB1WB007109; ESTAGB1WB008988; ESTAGB1WB009362; ESTAGB1WB011117; ESTAGB1WB011429; ESTAGB1WB012222; ESTAGB1WB012316; ESTAGB1WB014144; ESTAGB1WB015055; ESTAGB1WB015901; ESTAGB1WB016512; ESTAGB1WB017924
Terpenoid backbone biosynthesis	map00900	5	ESTAGB1WB005178; ESTAGB1WB007440; ESTAGB1WB007950; ESTAGB1WB012884; ESTAGB1WB015314
Limonene and pinene degradation	map00903	4	ESTAGB1WB000579; ESTAGB1WB001273; ESTAGB1WB006754; ESTAGB1WB009967
Nitrogen metabolism	map00910	10	ESTAGB1WB000139; ESTAGB1WB001905; ESTAGB1WB005259; ESTAGB1WB011987; ESTAGB1WB016590; ESTAGB1WB016912; ESTAGB1WB017156; ESTAGB1WB017376; ESTAGB1WB018317; ESTAGB1WB018410
Sulfur metabolism	map00920	2	ESTAGB1WB005840; ESTAGB1WB007809
Caprolactam degradation	map00930	5	ESTAGB1WB000579; ESTAGB1WB001468; ESTAGB1WB004280; ESTAGB1WB009967; ESTAGB1WB013591
Phenylpropanoid biosynthesis	map00940	8	ESTAGB1WB001018; ESTAGB1WB001091; ESTAGB1WB001287; ESTAGB1WB001329; ESTAGB1WB003549; ESTAGB1WB004672; ESTAGB1WB007030; ESTAGB1WB013813
Flavone and flavonol biosynthesis	map00944	2	ESTAGB1WB007109; ESTAGB1WB015901
Isoquinoline alkaloid biosynthesis	map00950	3	ESTAGB1WB004430; ESTAGB1WB007496; ESTAGB1WB012900
Tropane, piperidine and pyridine alkaloid biosynthesis	map00960	5	ESTAGB1WB001236; ESTAGB1WB003532; ESTAGB1WB003747; ESTAGB1WB004821; ESTAGB1WB016014
Aminoacyl-tRNA biosynthesis	map00970	35	ESTAGB1WB000327; ESTAGB1WB000935; ESTAGB1WB001426; ESTAGB1WB001891; ESTAGB1WB004059; ESTAGB1WB004196; ESTAGB1WB004357; ESTAGB1WB004918; ESTAGB1WB005579; ESTAGB1WB005881; ESTAGB1WB005980; ESTAGB1WB006070; ESTAGB1WB006278; ESTAGB1WB007100; ESTAGB1WB007495; ESTAGB1WB007501; ESTAGB1WB008385; ESTAGB1WB008869; ESTAGB1WB008988; ESTAGB1WB009007; ESTAGB1WB009209; ESTAGB1WB009362; ESTAGB1WB011342; ESTAGB1W…
Metabolism of xenobiotics by cytochrome P450	map00980	8	ESTAGB1WB002349; ESTAGB1WB003073; ESTAGB1WB003967; ESTAGB1WB004342; ESTAGB1WB006754; ESTAGB1WB011117; ESTAGB1WB014149; ESTAGB1WB015213
Drug metabolism - cytochrome P450	map00982	7	ESTAGB1WB002349; ESTAGB1WB003073; ESTAGB1WB003967; ESTAGB1WB004342; ESTAGB1WB006754; ESTAGB1WB011117; ESTAGB1WB014149
Drug metabolism - other enzymes	map00983	22	ESTAGB1WB001178; ESTAGB1WB001236; ESTAGB1WB001263; ESTAGB1WB001902; ESTAGB1WB002101; ESTAGB1WB002169; ESTAGB1WB002349; ESTAGB1WB002897; ESTAGB1WB002898; ESTAGB1WB003073; ESTAGB1WB003532; ESTAGB1WB003747; ESTAGB1WB004821; ESTAGB1WB004909; ESTAGB1WB007109; ESTAGB1WB007691; ESTAGB1WB008838; ESTAGB1WB011117; ESTAGB1WB015901; ESTAGB1WB016014; ESTAGB1WB017925; ESTAGB1WB018317
Biosynthesis of unsaturated fatty acids	map01040	10	ESTAGB1WB000579; ESTAGB1WB002817; ESTAGB1WB002818; ESTAGB1WB003435; ESTAGB1WB005021; ESTAGB1WB006990; ESTAGB1WB008843; ESTAGB1WB009046; ESTAGB1WB009967; ESTAGB1WB016429
Biosynthesis of ansamycins	map01051	1	ESTAGB1WB002083
Biosynthesis of phenylpropanoids	map01061	55	ESTAGB1WB000073; ESTAGB1WB000124; ESTAGB1WB000137; ESTAGB1WB000216; ESTAGB1WB000228; ESTAGB1WB000428; ESTAGB1WB001018; ESTAGB1WB001287; ESTAGB1WB001329; ESTAGB1WB001971; ESTAGB1WB002083; ESTAGB1WB002338; ESTAGB1WB002465; ESTAGB1WB002530; ESTAGB1WB003036; ESTAGB1WB003347; ESTAGB1WB003369; ESTAGB1WB003427; ESTAGB1WB003549; ESTAGB1WB003588; ESTAGB1WB003914; ESTAGB1WB003916; ESTAGB1WB003986; ESTAGB1W…
Biosynthesis of terpenoids and steroids	map01062	52	ESTAGB1WB000073; ESTAGB1WB000124; ESTAGB1WB000137; ESTAGB1WB000151; ESTAGB1WB000216; ESTAGB1WB000228; ESTAGB1WB000428; ESTAGB1WB001971; ESTAGB1WB002338; ESTAGB1WB002465; ESTAGB1WB002485; ESTAGB1WB002486; ESTAGB1WB002530; ESTAGB1WB003036; ESTAGB1WB003347; ESTAGB1WB003369; ESTAGB1WB003427; ESTAGB1WB003588; ESTAGB1WB003916; ESTAGB1WB004146; ESTAGB1WB004199; ESTAGB1WB004313; ESTAGB1WB004994; ESTAGB1W…
Biosynthesis of alkaloids derived from shikimate pathway	map01063	51	ESTAGB1WB000073; ESTAGB1WB000124; ESTAGB1WB000137; ESTAGB1WB000151; ESTAGB1WB000216; ESTAGB1WB000228; ESTAGB1WB000428; ESTAGB1WB001971; ESTAGB1WB002083; ESTAGB1WB002338; ESTAGB1WB002465; ESTAGB1WB002485; ESTAGB1WB002486; ESTAGB1WB002530; ESTAGB1WB003036; ESTAGB1WB003347; ESTAGB1WB003369; ESTAGB1WB003427; ESTAGB1WB003588; ESTAGB1WB003914; ESTAGB1WB003916; ESTAGB1WB004146; ESTAGB1WB004199; ESTAGB1W…
Biosynthesis of alkaloids derived from ornithine, lysine and nicotinic acid	map01064	54	ESTAGB1WB000073; ESTAGB1WB000124; ESTAGB1WB000137; ESTAGB1WB000151; ESTAGB1WB000216; ESTAGB1WB000228; ESTAGB1WB000428; ESTAGB1WB001971; ESTAGB1WB002338; ESTAGB1WB002465; ESTAGB1WB002485; ESTAGB1WB002486; ESTAGB1WB002530; ESTAGB1WB002871; ESTAGB1WB003036; ESTAGB1WB003347; ESTAGB1WB003369; ESTAGB1WB003427; ESTAGB1WB003588; ESTAGB1WB003916; ESTAGB1WB004146; ESTAGB1WB004199; ESTAGB1WB004313; ESTAGB1W…
Biosynthesis of alkaloids derived from histidine and purine	map01065	63	ESTAGB1WB000073; ESTAGB1WB000124; ESTAGB1WB000137; ESTAGB1WB000151; ESTAGB1WB000216; ESTAGB1WB000228; ESTAGB1WB000428; ESTAGB1WB000473; ESTAGB1WB001971; ESTAGB1WB002338; ESTAGB1WB002465; ESTAGB1WB002485; ESTAGB1WB002486; ESTAGB1WB002530; ESTAGB1WB002595; ESTAGB1WB003036; ESTAGB1WB003347; ESTAGB1WB003369; ESTAGB1WB003427; ESTAGB1WB003588; ESTAGB1WB003916; ESTAGB1WB004133; ESTAGB1WB004146; ESTAGB1W…
Biosynthesis of alkaloids derived from terpenoid and polyketide	map01066	52	ESTAGB1WB000073; ESTAGB1WB000124; ESTAGB1WB000137; ESTAGB1WB000151; ESTAGB1WB000216; ESTAGB1WB000228; ESTAGB1WB000428; ESTAGB1WB001971; ESTAGB1WB002338; ESTAGB1WB002465; ESTAGB1WB002485; ESTAGB1WB002486; ESTAGB1WB002530; ESTAGB1WB003036; ESTAGB1WB003347; ESTAGB1WB003369; ESTAGB1WB003427; ESTAGB1WB003588; ESTAGB1WB003916; ESTAGB1WB004146; ESTAGB1WB004199; ESTAGB1WB004313; ESTAGB1WB004994; ESTAGB1W…
Biosynthesis of plant hormones	map01070	76	ESTAGB1WB000073; ESTAGB1WB000124; ESTAGB1WB000137; ESTAGB1WB000151; ESTAGB1WB000216; ESTAGB1WB000228; ESTAGB1WB000428; ESTAGB1WB000473; ESTAGB1WB000579; ESTAGB1WB001468; ESTAGB1WB001971; ESTAGB1WB002083; ESTAGB1WB002338; ESTAGB1WB002465; ESTAGB1WB002485; ESTAGB1WB002486; ESTAGB1WB002530; ESTAGB1WB002595; ESTAGB1WB003036; ESTAGB1WB003347; ESTAGB1WB003369; ESTAGB1WB003427; ESTAGB1WB003543; ESTAGB1W…
Phosphatidylinositol signaling system	map04070	26	ESTAGB1WB000980; ESTAGB1WB001751; ESTAGB1WB001811; ESTAGB1WB002711; ESTAGB1WB003520; ESTAGB1WB003912; ESTAGB1WB003998; ESTAGB1WB005554; ESTAGB1WB006638; ESTAGB1WB007182; ESTAGB1WB007347; ESTAGB1WB008319; ESTAGB1WB008996; ESTAGB1WB009055; ESTAGB1WB010135; ESTAGB1WB010401; ESTAGB1WB011185; ESTAGB1WB012232; ESTAGB1WB012544; ESTAGB1WB015785; ESTAGB1WB017588; ESTAGB1WB018079; ESTAGB1WB018216; ESTAGB1W…
mTOR signaling pathway	map04150	3	ESTAGB1WB003668; ESTAGB1WB005480; ESTAGB1WB018591
Axon guidance	map04360	23	ESTAGB1WB000130; ESTAGB1WB000221; ESTAGB1WB001282; ESTAGB1WB003500; ESTAGB1WB003896; ESTAGB1WB004788; ESTAGB1WB005480; ESTAGB1WB005734; ESTAGB1WB006299; ESTAGB1WB006356; ESTAGB1WB006495; ESTAGB1WB006626; ESTAGB1WB007771; ESTAGB1WB010689; ESTAGB1WB013183; ESTAGB1WB013914; ESTAGB1WB014011; ESTAGB1WB014447; ESTAGB1WB014707; ESTAGB1WB015216; ESTAGB1WB016497; ESTAGB1WB016518; ESTAGB1WB019011
T cell receptor signaling pathway	map04660	13	ESTAGB1WB000130; ESTAGB1WB000221; ESTAGB1WB001282; ESTAGB1WB003500; ESTAGB1WB003896; ESTAGB1WB006299; ESTAGB1WB006356; ESTAGB1WB006495; ESTAGB1WB010689; ESTAGB1WB013914; ESTAGB1WB014447; ESTAGB1WB015216; ESTAGB1WB019011
