# Supplementary material for: Combining Next-Generation Sequencing Strategies for Rapid Molecular Resource Development from an Invasive Aphid Species, Aphis glycines
Source: PLoS One. 2010 Jun 29;5(6):e11370. doi: 10.1371/journal.pone.0011370 (PMC2894077; doi:10.1371/journal.pone.0011370)
Supplement: Table S4 — Single nucleotide polymorphisms (SNPs) predicted in Aphis glycines B2 genomic sequences (0.07 MB XLS) [file pone.0011370.s005.xls]

## Sheet: Table_S4
A. glycines sequence name	Position	Reference base	Consensus base	Phred-like consensus quality	Read depth	Variant base
GMAGB2RR000007	242	A	M	50	15	C
GMAGB2RR000016	175	T	W	49	15	A
GMAGB2RR000016	176	C	M	66	17	A
GMAGB2RR000020	260	A	R	44	11	G
GMAGB2RR000034	861	C	Y	44	8	T
GMAGB2RR000044	587	A	R	85	17	G
GMAGB2RR000054	277	A	W	95	16	T
GMAGB2RR000054	444	C	M	47	10	A
GMAGB2RR000058	657	G	R	105	15	A
GMAGB2RR000058	956	A	W	52	10	T
GMAGB2RR000062	127	T	Y	60	11	C
GMAGB2RR000066	383	A	R	83	12	G
GMAGB2RR000066	388	C	S	84	13	G
GMAGB2RR000073	717	C	Y	61	23	T
GMAGB2RR000087	920	A	R	51	9	G
GMAGB2RR000090	197	T	W	104	20	A
GMAGB2RR000090	259	T	Y	86	21	C
GMAGB2RR000090	486	A	M	60	42	C
GMAGB2RR000108	247	A	R	106	22	G
GMAGB2RR000113	57	C	Y	57	22	T
GMAGB2RR000116	163	G	K	129	19	T
GMAGB2RR000125	131	T	W	79	10	A
GMAGB2RR000125	482	A	W	45	12	T
GMAGB2RR000134	565	T	K	136	28	G
GMAGB2RR000134	1242	A	R	161	30	G
GMAGB2RR000134	1503	C	Y	70	14	T
GMAGB2RR000137	116	G	R	81	14	A
GMAGB2RR000150	109	G	R	59	9	A
GMAGB2RR000150	146	T	W	58	10	A
GMAGB2RR000150	903	T	Y	54	19	C
GMAGB2RR000156	387	A	R	60	11	G
GMAGB2RR000158	278	A	R	64	18	G
GMAGB2RR000159	416	T	W	63	8	A
GMAGB2RR000163	90	G	R	58	20	A
GMAGB2RR000176	238	C	Y	58	15	T
GMAGB2RR000179	1652	C	Y	60	24	T
GMAGB2RR000190	265	A	W	72	14	T
GMAGB2RR000192	229	A	R	51	16	G
GMAGB2RR000193	820	C	Y	95	17	T
GMAGB2RR000198	203	T	W	68	9	A
GMAGB2RR000198	205	T	W	60	9	A
GMAGB2RR000198	678	C	Y	73	13	T
GMAGB2RR000198	679	T	W	75	14	A
GMAGB2RR000198	784	T	Y	187	35	C
GMAGB2RR000198	788	G	K	177	33	T
GMAGB2RR000200	41	A	W	28	10	T
GMAGB2RR000200	71	T	K	38	13	G
GMAGB2RR000200	215	C	Y	52	30	T
GMAGB2RR000200	307	T	K	44	22	G
GMAGB2RR000200	345	T	Y	63	35	C
GMAGB2RR000200	412	G	S	80	26	C
GMAGB2RR000207	709	T	W	58	11	A
GMAGB2RR000217	96	C	Y	47	15	T
GMAGB2RR000217	874	C	Y	108	17	T
GMAGB2RR000219	31	C	Y	15	8	T
GMAGB2RR000227	223	C	M	53	30	A
GMAGB2RR000227	232	A	R	78	23	G
GMAGB2RR000237	445	G	K	83	23	T
GMAGB2RR000243	819	C	M	67	16	A
GMAGB2RR000252	806	A	M	105	26	C
GMAGB2RR000257	250	A	R	61	18	G
GMAGB2RR000257	463	A	R	47	12	G
GMAGB2RR000265	592	A	R	80	12	G
GMAGB2RR000276	314	C	Y	46	15	T
GMAGB2RR000282	490	C	Y	93	17	T
GMAGB2RR000285	58	G	R	72	24	A
GMAGB2RR000285	189	T	W	116	34	A
GMAGB2RR000285	201	G	R	81	31	A
GMAGB2RR000285	339	G	R	156	46	A
GMAGB2RR000302	572	T	Y	64	17	C
GMAGB2RR000309	431	G	R	72	35	A
GMAGB2RR000310	224	C	Y	55	20	T
GMAGB2RR000320	454	C	Y	104	16	T
GMAGB2RR000331	352	C	Y	91	21	T
GMAGB2RR000331	474	A	M	40	10	C
GMAGB2RR000331	535	G	R	81	16	A
GMAGB2RR000332	605	C	Y	84	16	T
GMAGB2RR000335	164	T	W	55	10	A
GMAGB2RR000335	802	A	M	72	11	C
GMAGB2RR000335	863	T	W	61	12	A
GMAGB2RR000339	421	A	R	106	24	G
GMAGB2RR000360	247	T	W	56	10	A
GMAGB2RR000366	193	G	R	11	11	A
GMAGB2RR000368	606	G	R	69	15	A
GMAGB2RR000370	353	C	Y	72	13	T
GMAGB2RR000387	67	T	Y	116	27	C
GMAGB2RR000392	440	G	R	15	9	A
GMAGB2RR000396	139	A	R	100	15	G
GMAGB2RR000397	629	C	Y	52	13	T
GMAGB2RR000397	867	G	R	66	13	A
GMAGB2RR000397	954	A	M	58	15	C
GMAGB2RR000397	984	G	S	51	13	C
GMAGB2RR000397	987	G	S	50	14	C
GMAGB2RR000398	302	T	Y	91	41	C
GMAGB2RR000400	275	C	Y	89	15	T
GMAGB2RR000401	452	C	Y	68	11	T
GMAGB2RR000402	237	A	R	53	13	G
GMAGB2RR000403	196	C	Y	63	14	T
GMAGB2RR000437	172	C	Y	49	14	T
GMAGB2RR000446	113	T	Y	81	17	C
GMAGB2RR000451	268	C	M	72	13	A
GMAGB2RR000455	514	A	R	76	19	G
GMAGB2RR000455	540	C	Y	79	20	T
GMAGB2RR000466	483	C	Y	90	23	T
GMAGB2RR000472	317	G	R	54	11	A
GMAGB2RR000472	531	A	R	48	19	G
GMAGB2RR000475	527	T	W	56	13	A
GMAGB2RR000479	153	A	R	66	13	G
GMAGB2RR000480	91	T	Y	85	22	C
GMAGB2RR000492	147	T	Y	67	14	C
GMAGB2RR000492	306	G	R	59	22	A
GMAGB2RR000492	355	A	M	83	17	C
GMAGB2RR000492	489	G	R	56	17	A
GMAGB2RR000492	602	C	Y	55	21	T
GMAGB2RR000498	231	A	W	47	22	T
GMAGB2RR000498	347	T	Y	177	50	C
GMAGB2RR000498	376	A	R	180	39	G
GMAGB2RR000498	423	A	R	194	35	G
GMAGB2RR000510	608	G	R	64	15	A
GMAGB2RR000513	57	A	R	108	24	G
GMAGB2RR000515	156	C	M	40	20	A
GMAGB2RR000516	198	A	R	123	32	G
GMAGB2RR000516	291	A	R	117	22	G
GMAGB2RR000516	383	A	R	45	13	G
GMAGB2RR000516	547	C	Y	151	31	T
GMAGB2RR000516	699	A	R	132	33	G
GMAGB2RR000517	31	A	R	75	15	G
GMAGB2RR000517	389	C	Y	1	14	T
GMAGB2RR000523	146	G	R	8	8	A
GMAGB2RR000530	408	C	Y	40	13	T
GMAGB2RR000531	652	T	W	48	14	A
GMAGB2RR000533	398	T	Y	69	12	C
GMAGB2RR000535	147	A	R	131	25	G
GMAGB2RR000543	325	C	Y	70	13	T
GMAGB2RR000543	487	T	Y	46	12	C
GMAGB2RR000546	98	A	R	97	21	G
GMAGB2RR000546	591	T	K	99	14	G
GMAGB2RR000547	547	T	Y	86	25	C
GMAGB2RR000549	311	G	R	91	19	A
GMAGB2RR000553	228	G	R	104	23	A
GMAGB2RR000553	231	A	R	82	21	G
GMAGB2RR000556	15	A	R	46	6	G
GMAGB2RR000558	31	G	S	60	12	C
GMAGB2RR000558	319	T	Y	98	16	C
GMAGB2RR000558	334	A	W	95	17	T
GMAGB2RR000560	31	T	K	63	11	G
GMAGB2RR000578	71	G	R	89	16	A
GMAGB2RR000578	77	G	R	102	19	A
GMAGB2RR000580	255	T	Y	142	24	C
GMAGB2RR000582	253	T	K	48	14	G
GMAGB2RR000583	196	C	Y	90	22	T
GMAGB2RR000584	41	A	W	42	12	T
GMAGB2RR000584	86	T	Y	41	18	C
GMAGB2RR000584	644	G	K	45	10	T
GMAGB2RR000585	150	T	Y	49	31	C
GMAGB2RR000586	449	C	Y	55	21	T
GMAGB2RR000589	338	A	W	76	14	T
GMAGB2RR000594	73	T	Y	105	30	C
GMAGB2RR000594	144	T	Y	82	24	C
GMAGB2RR000594	222	C	Y	26	16	T
GMAGB2RR000594	363	T	Y	118	20	C
GMAGB2RR000594	474	A	R	79	20	G
GMAGB2RR000595	1282	A	R	49	9	G
GMAGB2RR000598	408	C	Y	67	15	T
GMAGB2RR000614	709	T	W	109	18	A
GMAGB2RR000614	909	A	R	109	17	G
GMAGB2RR000625	524	A	R	41	11	G
GMAGB2RR000627	172	G	R	64	11	A
GMAGB2RR000627	193	A	M	18	8	C
GMAGB2RR000627	273	T	W	41	13	A
GMAGB2RR000629	360	G	R	101	18	A
GMAGB2RR000633	87	C	M	79	12	A
GMAGB2RR000633	130	G	R	96	13	A
GMAGB2RR000633	146	G	K	92	17	T
GMAGB2RR000633	200	G	S	88	16	C
GMAGB2RR000633	270	A	W	117	24	T
GMAGB2RR000633	499	G	R	70	24	A
GMAGB2RR000633	515	A	M	156	25	C
GMAGB2RR000633	536	T	Y	62	23	C
GMAGB2RR000633	564	T	Y	69	33	C
GMAGB2RR000633	618	A	R	150	24	G
GMAGB2RR000633	795	A	W	77	23	T
GMAGB2RR000633	797	G	K	109	21	T
GMAGB2RR000633	816	T	Y	41	27	C
GMAGB2RR000633	860	G	R	107	26	A
GMAGB2RR000637	48	A	M	124	31	C
GMAGB2RR000637	178	T	Y	111	29	C
GMAGB2RR000637	338	C	M	131	22	A
GMAGB2RR000637	357	A	R	63	15	G
GMAGB2RR000637	878	C	S	87	14	G
GMAGB2RR000637	1009	C	Y	93	13	T
GMAGB2RR000640	571	T	Y	40	9	C
GMAGB2RR000646	734	T	Y	111	28	C
GMAGB2RR000655	180	G	R	121	28	A
GMAGB2RR000655	242	C	Y	113	23	T
GMAGB2RR000656	541	G	R	60	13	A
GMAGB2RR000667	1332	G	R	60	24	A
GMAGB2RR000667	1659	T	W	70	10	A
GMAGB2RR000679	173	A	R	80	17	G
GMAGB2RR000679	322	A	R	34	11	G
GMAGB2RR000685	28	C	Y	64	25	T
GMAGB2RR000685	58	G	R	50	35	A
GMAGB2RR000686	250	T	Y	187	47	C
GMAGB2RR000686	1161	G	R	47	38	A
GMAGB2RR000686	1210	A	W	64	43	T
GMAGB2RR000686	1594	T	Y	72	19	C
GMAGB2RR000689	992	T	Y	73	13	C
GMAGB2RR000696	31	C	M	78	11	A
GMAGB2RR000697	484	G	R	48	10	A
GMAGB2RR000698	226	A	R	45	15	G
GMAGB2RR000708	662	T	Y	69	16	C
GMAGB2RR000709	683	C	Y	53	21	T
GMAGB2RR000711	711	T	Y	72	12	C
GMAGB2RR000729	70	T	Y	46	11	C
GMAGB2RR000729	288	C	M	94	17	A
GMAGB2RR000729	344	A	R	47	19	G
GMAGB2RR000729	377	C	S	45	12	G
GMAGB2RR000729	461	T	Y	54	19	C
GMAGB2RR000733	73	G	R	44	9	A
GMAGB2RR000733	277	G	R	73	37	A
GMAGB2RR000733	433	A	R	92	33	G
GMAGB2RR000733	457	A	R	50	38	G
GMAGB2RR000733	484	G	R	72	31	A
GMAGB2RR000735	191	A	R	66	21	G
GMAGB2RR000750	152	A	M	76	14	C
GMAGB2RR000753	59	C	Y	41	11	T
GMAGB2RR000757	504	C	Y	128	22	T
GMAGB2RR000757	648	A	M	41	13	C
GMAGB2RR000757	892	A	R	61	11	G
GMAGB2RR000760	181	T	Y	54	17	C
GMAGB2RR000760	275	C	Y	92	16	T
GMAGB2RR000780	280	G	R	140	26	A
GMAGB2RR000780	449	A	R	60	17	G
GMAGB2RR000795	279	A	R	57	16	G
GMAGB2RR000795	379	C	Y	42	13	T
GMAGB2RR000795	533	C	Y	44	11	T
GMAGB2RR000796	163	C	Y	49	19	T
GMAGB2RR000796	291	A	R	150	23	G
GMAGB2RR000798	499	C	Y	20	6	T
GMAGB2RR000803	241	T	Y	49	21	C
GMAGB2RR000803	376	G	R	92	12	A
GMAGB2RR000803	501	T	Y	27	10	C
GMAGB2RR000808	221	G	R	61	17	A
GMAGB2RR000817	219	A	R	71	17	G
GMAGB2RR000817	494	A	R	119	19	G
GMAGB2RR000828	216	G	R	48	14	A
GMAGB2RR000828	750	T	W	50	8	A
GMAGB2RR000832	697	T	W	90	13	A
GMAGB2RR000836	363	T	Y	147	33	C
GMAGB2RR000836	452	G	R	87	25	A
GMAGB2RR000836	497	G	R	77	21	A
GMAGB2RR000839	137	A	R	85	16	G
GMAGB2RR000839	364	G	R	51	13	A
GMAGB2RR000844	503	G	K	80	14	T
GMAGB2RR000845	292	G	R	88	26	A
GMAGB2RR000846	465	G	R	62	11	A
GMAGB2RR000851	64	A	W	76	13	T
GMAGB2RR000853	497	T	Y	89	33	C
GMAGB2RR000862	41	T	W	92	25	A
GMAGB2RR000862	284	C	M	187	61	A
GMAGB2RR000862	289	A	W	120	65	T
GMAGB2RR000862	335	C	M	72	112	A
GMAGB2RR000862	406	G	R	107	184	A
GMAGB2RR000862	437	T	K	232	144	G
GMAGB2RR000865	290	A	R	40	19	G
GMAGB2RR000867	713	T	Y	71	15	C
GMAGB2RR000875	509	A	R	42	14	G
GMAGB2RR000875	745	A	R	95	15	G
GMAGB2RR000880	296	A	R	54	16	G
GMAGB2RR000881	130	A	R	76	22	G
GMAGB2RR000881	498	T	Y	75	21	C
GMAGB2RR000882	86	T	Y	116	27	C
GMAGB2RR000882	167	T	Y	136	40	C
GMAGB2RR000882	856	G	R	83	11	A
GMAGB2RR000882	926	C	Y	98	21	T
GMAGB2RR000889	471	C	Y	64	11	T
GMAGB2RR000889	593	T	Y	97	14	C
GMAGB2RR000893	93	T	Y	67	14	C
GMAGB2RR000893	159	C	Y	128	23	T
GMAGB2RR000893	167	C	Y	68	30	T
GMAGB2RR000893	210	T	Y	131	35	C
GMAGB2RR000893	343	C	Y	129	29	T
GMAGB2RR000893	399	T	Y	157	30	C
GMAGB2RR000899	349	A	R	50	21	G
GMAGB2RR000899	351	G	S	62	22	C
GMAGB2RR000900	115	G	K	65	13	T
GMAGB2RR000902	589	A	M	94	12	C
GMAGB2RR000904	230	G	R	54	15	A
GMAGB2RR000904	512	T	K	46	15	G
GMAGB2RR000906	775	C	Y	55	8	T
GMAGB2RR000907	71	A	R	73	12	G
GMAGB2RR000907	191	C	Y	5	8	T
GMAGB2RR000910	302	T	Y	62	18	C
GMAGB2RR000910	355	A	W	72	14	T
GMAGB2RR000911	440	C	M	73	20	A
GMAGB2RR000913	279	T	Y	115	20	C
GMAGB2RR000916	695	C	Y	64	11	T
GMAGB2RR000918	31	A	W	33	9	T
GMAGB2RR000918	618	G	R	68	13	A
GMAGB2RR000922	131	A	M	109	15	C
GMAGB2RR000928	255	C	M	44	11	A
GMAGB2RR000934	180	C	Y	57	22	T
GMAGB2RR000945	208	G	R	90	17	A
GMAGB2RR000962	403	A	W	47	9	T
GMAGB2RR000963	189	A	R	59	13	G
GMAGB2RR000968	231	A	M	43	36	C
GMAGB2RR000968	683	T	Y	41	12	C
GMAGB2RR000974	419	G	K	73	12	T
GMAGB2RR000994	7	A	W	88	18	T
GMAGB2RR000994	10	T	W	85	18	A
GMAGB2RR000994	161	T	W	107	18	A
GMAGB2RR000995	543	A	R	64	12	G
GMAGB2RR001005	252	G	R	99	17	A
GMAGB2RR001006	331	A	W	97	23	T
GMAGB2RR001020	603	G	R	54	10	A
GMAGB2RR001021	68	C	Y	75	21	T
GMAGB2RR001024	634	G	K	40	9	T
GMAGB2RR001030	548	G	R	86	20	A
GMAGB2RR001044	353	A	R	102	20	G
GMAGB2RR001056	352	G	R	56	13	A
GMAGB2RR001057	547	T	Y	70	20	C
GMAGB2RR001064	209	C	Y	74	13	T
GMAGB2RR001065	133	C	Y	72	14	T
GMAGB2RR001069	445	A	R	42	11	G
GMAGB2RR001080	519	T	Y	109	21	C
GMAGB2RR001080	635	T	Y	66	14	C
GMAGB2RR001082	431	C	Y	149	37	T
GMAGB2RR001082	625	C	Y	97	22	T
GMAGB2RR001082	709	A	W	58	11	T
GMAGB2RR001084	426	A	R	40	11	G
GMAGB2RR001084	451	A	R	68	13	G
GMAGB2RR001089	75	A	R	63	11	G
GMAGB2RR001090	475	A	R	117	17	G
GMAGB2RR001090	485	G	S	113	19	C
GMAGB2RR001101	380	G	R	120	22	A
GMAGB2RR001104	25	C	Y	33	9	T
GMAGB2RR001104	423	A	W	109	16	T
GMAGB2RR001106	510	C	S	45	14	G
GMAGB2RR001106	545	A	R	52	12	G
GMAGB2RR001107	20	T	Y	88	14	C
GMAGB2RR001107	52	T	Y	191	36	C
GMAGB2RR001107	106	G	R	53	33	A
GMAGB2RR001107	175	A	R	95	18	G
GMAGB2RR001107	234	T	Y	88	19	C
GMAGB2RR001107	268	G	R	41	25	A
GMAGB2RR001107	383	T	Y	85	28	C
GMAGB2RR001107	441	G	R	64	34	A
GMAGB2RR001107	459	A	R	86	34	G
GMAGB2RR001107	539	G	K	73	26	T
GMAGB2RR001107	679	T	Y	80	16	C
GMAGB2RR001107	693	T	Y	108	19	C
GMAGB2RR001107	750	T	Y	39	26	C
GMAGB2RR001111	63	G	R	105	18	A
GMAGB2RR001111	177	G	R	149	23	A
GMAGB2RR001115	460	T	Y	45	21	C
GMAGB2RR001121	116	T	Y	103	27	C
GMAGB2RR001121	349	A	M	121	29	C
GMAGB2RR001121	399	G	K	151	27	T
GMAGB2RR001121	400	C	Y	146	28	T
GMAGB2RR001122	244	T	W	137	30	A
GMAGB2RR001126	462	A	W	44	7	T
GMAGB2RR001130	199	A	R	46	12	G
GMAGB2RR001130	200	A	W	52	12	T
GMAGB2RR001131	384	T	Y	83	15	C
GMAGB2RR001154	487	C	Y	138	24	T
GMAGB2RR001154	574	T	K	59	13	G
GMAGB2RR001155	198	G	R	41	22	A
GMAGB2RR001161	31	A	M	33	9	C
GMAGB2RR001162	221	G	K	94	16	T
GMAGB2RR001163	311	C	M	45	23	A
GMAGB2RR001165	308	A	R	138	26	G
GMAGB2RR001168	444	G	R	85	14	A
GMAGB2RR001168	623	G	R	62	13	A
GMAGB2RR001171	211	T	W	84	20	A
GMAGB2RR001186	526	A	R	86	22	G
GMAGB2RR001187	31	G	R	10	5	A
GMAGB2RR001187	228	G	S	69	21	C
GMAGB2RR001188	210	T	Y	45	13	C
GMAGB2RR001195	272	T	Y	75	14	C
GMAGB2RR001195	505	T	Y	79	22	C
GMAGB2RR001195	527	G	R	60	16	A
GMAGB2RR001196	221	T	W	55	9	A
GMAGB2RR001199	410	C	M	61	12	A
GMAGB2RR001200	122	T	Y	96	15	C
GMAGB2RR001200	133	A	R	46	12	G
GMAGB2RR001200	342	G	R	41	12	A
GMAGB2RR001203	168	G	R	112	24	A
GMAGB2RR001205	99	T	Y	51	13	C
GMAGB2RR001205	329	C	Y	38	15	T
GMAGB2RR001209	615	A	R	133	19	G
GMAGB2RR001212	99	A	R	51	15	G
GMAGB2RR001212	273	T	W	68	12	A
GMAGB2RR001214	387	C	S	93	22	G
GMAGB2RR001215	330	C	Y	106	23	T
GMAGB2RR001215	474	T	Y	45	16	C
GMAGB2RR001221	128	G	R	140	28	A
GMAGB2RR001223	490	T	Y	93	21	C
GMAGB2RR001224	544	A	W	117	16	T
GMAGB2RR001227	136	G	K	42	8	T
GMAGB2RR001227	384	A	W	58	10	T
GMAGB2RR001230	132	G	R	100	23	A
GMAGB2RR001230	728	T	K	56	15	G
GMAGB2RR001231	307	G	R	76	14	A
GMAGB2RR001231	345	G	R	106	16	A
GMAGB2RR001232	190	C	M	107	25	A
GMAGB2RR001232	478	T	K	105	21	G
GMAGB2RR001232	506	A	R	93	16	G
GMAGB2RR001233	249	G	R	24	10	A
GMAGB2RR001234	527	A	R	46	16	G
GMAGB2RR001236	54	T	K	169	31	G
GMAGB2RR001236	193	G	R	118	27	A
GMAGB2RR001236	233	A	W	129	16	T
GMAGB2RR001236	597	C	Y	53	11	T
GMAGB2RR001237	27	G	R	166	25	A
GMAGB2RR001237	56	A	R	116	37	G
GMAGB2RR001237	80	A	R	77	51	G
GMAGB2RR001237	124	G	R	96	49	A
GMAGB2RR001237	350	G	R	182	55	A
GMAGB2RR001238	69	C	M	84	57	A
GMAGB2RR001238	87	G	R	50	61	A
GMAGB2RR001238	101	A	R	43	67	G
GMAGB2RR001238	215	G	R	241	81	A
GMAGB2RR001238	287	C	Y	215	68	T
GMAGB2RR001238	628	A	W	47	49	T
GMAGB2RR001238	630	T	W	46	47	A
GMAGB2RR001238	783	C	Y	109	44	T
GMAGB2RR001240	262	G	R	77	30	A
GMAGB2RR001240	299	C	Y	71	31	T
GMAGB2RR001240	483	C	S	102	22	G
GMAGB2RR001240	504	G	R	110	30	A
