# Supplementary material for: Combining Next-Generation Sequencing Strategies for Rapid Molecular Resource Development from an Invasive Aphid Species, Aphis glycines
Source: PLoS One. 2010 Jun 29;5(6):e11370. doi: 10.1371/journal.pone.0011370 (PMC2894077; doi:10.1371/journal.pone.0011370)
Supplement: Table S5 — Single nucleotide polymorphisms (SNPs) predicted in Aphis glycines B1 transcript sequences (0.03 MB XLS) [file pone.0011370.s006.xls]

## Sheet: Table_S5
A. glycines sequence name	Position	Concensus	Variant	Num of reads	Percentage of variant
ESTAGB1WB002462	422	T	C	23	0.35
ESTAGB1WB002473	283	A	G	15	0.33
ESTAGB1WB002774	463	C	T	11	0.45
ESTAGB1WB002782	445	C	T	17	0.41
ESTAGB1WB002792	157	C	T	32	0.37
ESTAGB1WB002792	762	T	G	16	0.37
ESTAGB1WB002920	609	G	T	13	0.31
ESTAGB1WB002941	1045	G	A	17	0.47
ESTAGB1WB003054	695	G	A	27	0.48
ESTAGB1WB003070	164	T	A	46	0.11
ESTAGB1WB003118	19	T	A	24	0.17
ESTAGB1WB003118	65	G	A	29	0.34
ESTAGB1WB003118	74	G	C	30	0.17
ESTAGB1WB003118	133	A	T	30	0.2
ESTAGB1WB003118	145	G	T	30	0.5
ESTAGB1WB003118	209	A	G	29	0.34
ESTAGB1WB003118	243	G	A	26	0.31
ESTAGB1WB003118	244	T	A	26	0.31
ESTAGB1WB003118	326	T	C	16	0.38
ESTAGB1WB003118	336	A	T	15	0.4
ESTAGB1WB003118	354	T	C	15	0.4
ESTAGB1WB003119	168	A	G	16	0.31
ESTAGB1WB003121	74	T	C	37	0.27
ESTAGB1WB003121	98	C	T	45	0.33
ESTAGB1WB003121	419	T	C	51	0.39
ESTAGB1WB003122	139	C	T	13	0.38
ESTAGB1WB003122	238	G	T	36	0.19
ESTAGB1WB003123	7	G	A	23	0.39
ESTAGB1WB003123	28	A	G	28	0.29
ESTAGB1WB003123	31	A	G	29	0.21
ESTAGB1WB003248	228	T	C	66	0.35
ESTAGB1WB003327	686	G	A	34	0.38
ESTAGB1WB003358	310	G	A	38	0.39
ESTAGB1WB003414	794	T	C	49	0.16
ESTAGB1WB003437	336	G	A	10	0.4
ESTAGB1WB003442	756	C	T	12	0.5
ESTAGB1WB003518	427	C	T	11	0.45
ESTAGB1WB003519	42	C	A	27	0.44
ESTAGB1WB003524	515	G	A	41	0.49
ESTAGB1WB003524	767	A	G	34	0.41
ESTAGB1WB003524	1015	T	G	17	0.35
ESTAGB1WB003543	1315	C	T	16	0.25
ESTAGB1WB003618	210	A	T	47	0.38
ESTAGB1WB003745	1292	A	T	11	0.45
ESTAGB1WB003781	533	C	T	23	0.43
ESTAGB1WB003860	607	A	G	30	0.4
ESTAGB1WB003860	769	G	A	24	0.25
ESTAGB1WB003860	835	G	A	22	0.27
ESTAGB1WB003868	192	A	T	52	0.12
ESTAGB1WB004005	220	G	A	34	0.38
ESTAGB1WB004005	326	A	G	39	0.36
ESTAGB1WB004005	344	A	G	47	0.36
ESTAGB1WB004005	353	A	G	47	0.36
ESTAGB1WB004005	416	G	A	57	0.39
ESTAGB1WB004005	452	G	A	57	0.39
ESTAGB1WB004005	458	A	G	57	0.39
ESTAGB1WB004005	509	T	C	62	0.32
ESTAGB1WB004005	536	T	A	61	0.36
ESTAGB1WB004005	593	G	A	53	0.36
ESTAGB1WB004005	623	G	A	45	0.36
ESTAGB1WB004005	638	G	A	45	0.36
ESTAGB1WB004005	656	C	T	42	0.33
ESTAGB1WB004005	665	A	G	42	0.33
ESTAGB1WB004005	719	A	G	37	0.35
ESTAGB1WB004005	758	T	C	38	0.37
ESTAGB1WB004005	806	A	T	30	0.27
ESTAGB1WB004009	674	T	C	19	0.47
ESTAGB1WB004203	154	C	T	19	0.42
ESTAGB1WB004265	322	T	C	32	0.41
ESTAGB1WB004568	494	T	C	15	0.4
ESTAGB1WB004568	497	A	G	15	0.4
ESTAGB1WB004783	987	T	C	8	0.5
ESTAGB1WB004783	1107	C	T	10	0.5
ESTAGB1WB004783	1110	T	A	10	0.5
ESTAGB1WB004783	1180	T	C	10	0.4
ESTAGB1WB004783	1254	C	T	10	0.4
ESTAGB1WB004978	260	G	A	16	0.44
ESTAGB1WB005083	812	C	A	8	0.5
ESTAGB1WB005115	362	A	T	19	0.42
ESTAGB1WB005598	243	T	C	63	0.38
ESTAGB1WB006673	342	G	A	8	0.5
ESTAGB1WB008119	129	T	C	35	0.4
ESTAGB1WB008149	574	T	G	43	0.4
ESTAGB1WB008154	80	T	C	15	0.47
ESTAGB1WB008158	373	A	G	15	0.47
ESTAGB1WB008158	520	C	T	14	0.36
