# Supplementary material for: Combining Next-Generation Sequencing Strategies for Rapid Molecular Resource Development from an Invasive Aphid Species, Aphis glycines
Source: PLoS One. 2010 Jun 29;5(6):e11370. doi: 10.1371/journal.pone.0011370 (PMC2894077; doi:10.1371/journal.pone.0011370)
Supplement: Table S7 — Microsatellite loci predicted in Aphis glycines B1 and B2 sequences (0.21 MB XLS) [file pone.0011370.s008.xls]

## Sheet: msats
A. glycines sequence name	Sequence length	start	stop	motif_units	footprint	repeat_units	motif_type	primer design feasibility
ESTAGB1WB000003	1725	238	252	(tct)5	15	5	3	Y
ESTAGB1WB000029	1615	1031	1046	(tg)8	16	8	2	Y
ESTAGB1WB000034	582	16	30	(cgc)5	15	5	3	N
ESTAGB1WB000069	2160	215	230	(ta)8	16	8	2	Y
ESTAGB1WB000069	2160	1072	1089	(taa)6	18	6	3	Y
ESTAGB1WB000069	2160	875	895	(tat)7	21	7	3	Y
ESTAGB1WB000069	2160	2071	2092	(tg)11	22	11	2	Y
ESTAGB1WB000075	1699	603	617	(tat)5	15	5	3	Y
ESTAGB1WB000091	1503	1192	1206	(aac)5	15	5	3	Y
ESTAGB1WB000094	690	597	620	(aat)8	24	8	3	N
ESTAGB1WB000097	1324	391	405	(cgc)5	15	5	3	Y
ESTAGB1WB000099	1065	38	61	(att)8	24	8	3	N
ESTAGB1WB000099	1065	189	203	(tgt)5	15	5	3	Y
ESTAGB1WB000099	1065	2	19	(tta)6	18	6	3	Y
ESTAGB1WB000104	1580	75	94	(aata)5	20	5	4	N
ESTAGB1WB000107	953	171	185	(aat)5	15	5	3	Y
ESTAGB1WB000107	953	197	214	(taa)6	18	6	3	Y
ESTAGB1WB000109	1551	1431	1457	(tta)9	27	9	3	N
ESTAGB1WB000121	1127	334	353	(ataa)5	20	5	4	Y
ESTAGB1WB000121	1127	1000	1019	(ttta)5	20	5	4	Y
ESTAGB1WB000126	1641	1531	1548	(ata)6	18	6	3	Y
ESTAGB1WB000135	801	54	75	(ta)11	22	11	2	N
ESTAGB1WB000165	1459	778	798	(tct)7	21	7	3	Y
ESTAGB1WB000173	877	144	167	(ac)12	24	12	2	Y
ESTAGB1WB000180	844	151	166	(at)8	16	8	2	Y
ESTAGB1WB000180	844	698	715	(gcg)6	18	6	3	Y
ESTAGB1WB000188	910	874	894	(att)7	21	7	3	N
ESTAGB1WB000194	1308	1275	1289	(ata)5	15	5	3	N
ESTAGB1WB000198	1750	198	215	(at)9	18	9	2	Y
ESTAGB1WB000218	1145	976	995	(gacg)5	20	5	4	Y
ESTAGB1WB000223	1292	46	61	(ta)8	16	8	2	N
ESTAGB1WB000224	1533	484	498	(tat)5	15	5	3	Y
ESTAGB1WB000232	354	257	282	(tg)13	26	13	2	Y
ESTAGB1WB000239	971	126	141	(at)8	16	8	2	Y
ESTAGB1WB000252	733	47	67	(att)7	21	7	3	N
ESTAGB1WB000261	459	34	48	(tgc)5	15	5	3	Y
ESTAGB1WB000275	886	103	117	(ata)5	15	5	3	N
ESTAGB1WB000275	886	233	247	(taa)5	15	5	3	Y
ESTAGB1WB000277	1035	2	25	(tta)8	24	8	3	Y
ESTAGB1WB000282	537	284	298	(att)5	15	5	3	Y
ESTAGB1WB000325	438	133	153	(aat)7	21	7	3	Y
ESTAGB1WB000368	442	304	327	(att)8	24	8	3	Y
ESTAGB1WB000368	442	278	301	(tat)8	24	8	3	Y
ESTAGB1WB000387	531	156	173	(tta)6	18	6	3	Y
ESTAGB1WB000411	401	38	52	(ata)5	15	5	3	N
ESTAGB1WB000419	457	417	431	(tat)5	15	5	3	N
ESTAGB1WB000424	742	93	113	(att)7	21	7	3	Y
ESTAGB1WB000455	223	175	219	(ata)15	45	15	3	N
ESTAGB1WB000456	483	314	328	(tcg)5	15	5	3	Y
ESTAGB1WB000481	535	411	425	(tat)5	15	5	3	Y
ESTAGB1WB000494	267	119	142	(tg)12	24	12	2	Y
ESTAGB1WB000500	577	291	320	(tta)10	30	10	3	Y
ESTAGB1WB000503	403	210	225	(at)8	16	8	2	N
ESTAGB1WB000503	403	78	95	(taa)6	18	6	3	N
ESTAGB1WB000513	502	2	16	(aat)5	15	5	3	Y
ESTAGB1WB000513	502	452	466	(att)5	15	5	3	Y
ESTAGB1WB000531	684	160	174	(ctt)5	15	5	3	Y
ESTAGB1WB000533	466	408	422	(ata)5	15	5	3	N
ESTAGB1WB000552	650	263	277	(tcg)5	15	5	3	Y
ESTAGB1WB000569	430	3	20	(ta)9	18	9	2	N
ESTAGB1WB000578	395	304	333	(gat)10	30	10	3	Y
ESTAGB1WB000585	366	83	97	(tat)5	15	5	3	Y
ESTAGB1WB000593	358	114	131	(ata)6	18	6	3	N
ESTAGB1WB000596	769	731	754	(taa)8	24	8	3	N
ESTAGB1WB000598	882	819	838	(ac)10	20	10	2	N
ESTAGB1WB000634	437	54	68	(gtc)5	15	5	3	Y
ESTAGB1WB000646	359	118	135	(ata)6	18	6	3	Y
ESTAGB1WB000646	359	334	348	(att)5	15	5	3	N
ESTAGB1WB000646	359	245	266	(ta)11	22	11	2	Y
ESTAGB1WB000732	735	221	244	(ttat)6	24	6	4	N
ESTAGB1WB000734	730	485	516	(ttta)8	32	8	4	Y
ESTAGB1WB000743	312	145	164	(at)10	20	10	2	Y
ESTAGB1WB000767	955	450	476	(tta)9	27	9	3	Y
ESTAGB1WB000795	476	319	342	(tat)8	24	8	3	N
ESTAGB1WB000801	577	488	508	(ata)7	21	7	3	Y
ESTAGB1WB000801	577	560	577	(ata)6	18	6	3	N
ESTAGB1WB000804	571	441	461	(taa)7	21	7	3	N
ESTAGB1WB000835	540	120	135	(at)8	16	8	2	N
ESTAGB1WB000844	519	211	226	(at)8	16	8	2	N
ESTAGB1WB000858	601	441	456	(at)8	16	8	2	Y
ESTAGB1WB000880	677	196	210	(ata)5	15	5	3	Y
ESTAGB1WB000905	666	594	608	(att)5	15	5	3	N
ESTAGB1WB000907	328	271	286	(at)8	16	8	2	N
ESTAGB1WB000907	328	151	177	(att)9	27	9	3	Y
ESTAGB1WB000925	505	366	380	(att)5	15	5	3	N
ESTAGB1WB000933	497	380	394	(aat)5	15	5	3	Y
ESTAGB1WB000942	834	278	295	(ttg)6	18	6	3	Y
ESTAGB1WB000956	318	106	120	(tat)5	15	5	3	Y
ESTAGB1WB000957	315	36	59	(ata)8	24	8	3	N
ESTAGB1WB000995	593	47	61	(tat)5	15	5	3	Y
ESTAGB1WB001023	467	322	341	(ta)10	20	10	2	Y
ESTAGB1WB001039	504	322	336	(atg)5	15	5	3	Y
ESTAGB1WB001055	546	61	80	(tg)10	20	10	2	N
ESTAGB1WB001056	593	38	52	(tta)5	15	5	3	Y
ESTAGB1WB001103	488	143	178	(att)12	36	12	3	Y
ESTAGB1WB001139	456	99	119	(ata)7	21	7	3	Y
ESTAGB1WB001146	563	440	457	(tta)6	18	6	3	Y
ESTAGB1WB001159	579	4	24	(aat)7	21	7	3	N
ESTAGB1WB001159	579	27	47	(aat)7	21	7	3	N
ESTAGB1WB001172	760	124	147	(aat)8	24	8	3	Y
ESTAGB1WB001176	642	627	641	(taa)5	15	5	3	N
ESTAGB1WB001189	334	267	286	(ac)10	20	10	2	Y
ESTAGB1WB001189	334	121	150	(att)10	30	10	3	Y
ESTAGB1WB001219	477	442	475	(ta)17	34	17	2	N
ESTAGB1WB001263	613	66	80	(aac)5	15	5	3	Y
ESTAGB1WB001269	548	336	350	(gaa)5	15	5	3	Y
ESTAGB1WB001277	512	215	229	(taa)5	15	5	3	Y
ESTAGB1WB001303	915	209	223	(tat)5	15	5	3	Y
ESTAGB1WB001317	285	129	143	(tta)5	15	5	3	Y
ESTAGB1WB001358	468	322	336	(ggc)5	15	5	3	Y
ESTAGB1WB001381	741	204	221	(aat)6	18	6	3	Y
ESTAGB1WB001407	570	13	27	(aat)5	15	5	3	N
ESTAGB1WB001443	308	275	292	(aat)6	18	6	3	N
ESTAGB1WB001445	530	451	471	(tta)7	21	7	3	N
ESTAGB1WB001447	446	164	181	(tga)6	18	6	3	Y
ESTAGB1WB001453	508	225	242	(at)9	18	9	2	Y
ESTAGB1WB001459	518	465	482	(at)9	18	9	2	N
ESTAGB1WB001460	529	201	224	(tga)8	24	8	3	Y
ESTAGB1WB001474	684	33	48	(at)8	16	8	2	N
ESTAGB1WB001479	422	248	265	(cag)6	18	6	3	Y
ESTAGB1WB001483	801	670	684	(aat)5	15	5	3	Y
ESTAGB1WB001483	801	771	800	(at)15	30	15	2	N
ESTAGB1WB001512	436	416	431	(at)8	16	8	2	N
ESTAGB1WB001514	504	213	227	(aat)5	15	5	3	Y
ESTAGB1WB001542	567	57	80	(aat)8	24	8	3	Y
ESTAGB1WB001552	426	378	392	(aat)5	15	5	3	N
ESTAGB1WB001571	376	107	124	(at)9	18	9	2	N
ESTAGB1WB001577	340	308	334	(ata)9	27	9	3	N
ESTAGB1WB001628	448	25	39	(aga)5	15	5	3	N
ESTAGB1WB001642	412	251	265	(ata)5	15	5	3	Y
ESTAGB1WB001658	468	167	184	(cga)6	18	6	3	Y
ESTAGB1WB001664	818	20	37	(ata)6	18	6	3	N
ESTAGB1WB001671	469	447	467	(aat)7	21	7	3	N
ESTAGB1WB001680	245	150	164	(tat)5	15	5	3	Y
ESTAGB1WB001683	328	71	100	(gct)10	30	10	3	Y
ESTAGB1WB001688	466	52	66	(att)5	15	5	3	N
ESTAGB1WB001688	466	276	326	(tat)17	51	17	3	Y
ESTAGB1WB001695	349	207	236	(att)10	30	10	3	Y
ESTAGB1WB001698	694	579	596	(acg)6	18	6	3	Y
ESTAGB1WB001710	455	214	231	(tca)6	18	6	3	Y
ESTAGB1WB001747	331	55	69	(ata)5	15	5	3	N
ESTAGB1WB001757	795	194	211	(aat)6	18	6	3	Y
ESTAGB1WB001759	578	491	505	(atc)5	15	5	3	Y
ESTAGB1WB001761	272	1	21	(tat)7	21	7	3	N
ESTAGB1WB001761	272	41	58	(tta)6	18	6	3	N
ESTAGB1WB001761	272	62	94	(tta)11	33	11	3	N
ESTAGB1WB001780	556	11	25	(ata)5	15	5	3	N
ESTAGB1WB001787	397	7	21	(att)5	15	5	3	N
ESTAGB1WB001799	672	3	23	(acg)7	21	7	3	N
ESTAGB1WB001814	617	197	211	(att)5	15	5	3	Y
ESTAGB1WB001833	721	615	629	(aat)5	15	5	3	Y
ESTAGB1WB001857	413	80	100	(taa)7	21	7	3	Y
ESTAGB1WB001857	413	273	287	(tat)5	15	5	3	Y
ESTAGB1WB001875	412	199	219	(att)7	21	7	3	Y
ESTAGB1WB001876	629	116	136	(att)7	21	7	3	Y
ESTAGB1WB001896	538	491	508	(tta)6	18	6	3	N
ESTAGB1WB001903	294	117	137	(tta)7	21	7	3	Y
ESTAGB1WB001979	1258	585	599	(aag)5	15	5	3	Y
ESTAGB1WB001982	964	605	619	(atc)5	15	5	3	Y
ESTAGB1WB001994	1165	417	455	(ctg)13	39	13	3	Y
ESTAGB1WB001998	851	797	820	(ttat)6	24	6	4	N
ESTAGB1WB002028	934	318	338	(att)7	21	7	3	Y
ESTAGB1WB002035	510	284	298	(cgt)5	15	5	3	Y
ESTAGB1WB002052	493	277	291	(aat)5	15	5	3	Y
ESTAGB1WB002064	672	578	592	(tgt)5	15	5	3	Y
ESTAGB1WB002070	548	308	325	(tgc)6	18	6	3	Y
ESTAGB1WB002070	548	341	361	(tgc)7	21	7	3	Y
ESTAGB1WB002070	548	284	307	(tgt)8	24	8	3	Y
ESTAGB1WB002095	517	298	321	(att)8	24	8	3	Y
ESTAGB1WB002095	517	109	123	(tat)5	15	5	3	Y
ESTAGB1WB002097	1061	270	284	(acg)5	15	5	3	Y
ESTAGB1WB002097	1061	4	19	(ca)8	16	8	2	N
ESTAGB1WB002111	470	11	34	(tta)8	24	8	3	N
ESTAGB1WB002112	251	132	149	(tta)6	18	6	3	N
ESTAGB1WB002115	337	41	61	(tta)7	21	7	3	N
ESTAGB1WB002119	497	177	200	(tat)8	24	8	3	Y
ESTAGB1WB002119	497	480	497	(tta)6	18	6	3	N
ESTAGB1WB002138	421	229	243	(aat)5	15	5	3	Y
ESTAGB1WB002138	421	251	265	(aat)5	15	5	3	Y
ESTAGB1WB002143	520	15	29	(tca)5	15	5	3	N
ESTAGB1WB002175	627	382	402	(aat)7	21	7	3	Y
ESTAGB1WB002175	627	41	61	(taa)7	21	7	3	N
ESTAGB1WB002175	627	264	281	(taa)6	18	6	3	Y
ESTAGB1WB002175	627	512	531	(tg)10	20	10	2	Y
ESTAGB1WB002182	844	150	170	(tgt)7	21	7	3	Y
ESTAGB1WB002182	844	107	127	(tta)7	21	7	3	Y
ESTAGB1WB002186	712	220	237	(att)6	18	6	3	Y
ESTAGB1WB002213	609	394	423	(tta)10	30	10	3	Y
ESTAGB1WB002216	719	309	329	(cac)7	21	7	3	Y
ESTAGB1WB002216	719	344	358	(cat)5	15	5	3	Y
ESTAGB1WB002218	600	184	216	(atc)11	33	11	3	Y
ESTAGB1WB002258	740	141	161	(ata)7	21	7	3	Y
ESTAGB1WB002262	114	49	74	(ta)13	26	13	2	N
ESTAGB1WB002293	769	732	764	(aat)11	33	11	3	N
ESTAGB1WB002296	559	114	131	(ta)9	18	9	2	Y
ESTAGB1WB002297	1120	540	555	(at)8	16	8	2	Y
ESTAGB1WB002305	833	190	210	(ata)7	21	7	3	Y
ESTAGB1WB002306	525	231	255	(ttatt)5	25	5	5	Y
ESTAGB1WB002312	294	55	69	(gct)5	15	5	3	Y
ESTAGB1WB002313	391	228	243	(at)8	16	8	2	Y
ESTAGB1WB002317	915	518	532	(aag)5	15	5	3	Y
ESTAGB1WB002327	1591	780	800	(tta)7	21	7	3	Y
ESTAGB1WB002354	1983	808	822	(gaa)5	15	5	3	Y
ESTAGB1WB002354	1983	730	792	(gac)21	63	21	3	Y
ESTAGB1WB002364	1725	238	252	(tct)5	15	5	3	Y
ESTAGB1WB002390	1615	1031	1046	(tg)8	16	8	2	Y
ESTAGB1WB002395	582	16	30	(cgc)5	15	5	3	N
ESTAGB1WB002592	478	309	323	(tcg)5	15	5	3	Y
ESTAGB1WB002711	362	295	309	(att)5	15	5	3	Y
ESTAGB1WB002742	248	142	189	(ata)16	48	16	3	N
ESTAGB1WB002755	282	119	145	(tat)9	27	9	3	Y
ESTAGB1WB002767	594	77	94	(tat)6	18	6	3	N
ESTAGB1WB002804	786	346	360	(gat)5	15	5	3	Y
ESTAGB1WB002824	754	316	336	(agc)7	21	7	3	Y
ESTAGB1WB002824	754	298	315	(agt)6	18	6	3	Y
ESTAGB1WB002825	1033	308	325	(gct)6	18	6	3	Y
ESTAGB1WB002826	346	251	280	(ctg)10	30	10	3	Y
ESTAGB1WB002826	346	216	230	(tgc)5	15	5	3	Y
ESTAGB1WB002860	361	273	287	(tgc)5	15	5	3	Y
ESTAGB1WB002860	361	312	329	(tgc)6	18	6	3	Y
ESTAGB1WB002860	361	345	359	(tgc)5	15	5	3	N
ESTAGB1WB002860	361	288	311	(tgt)8	24	8	3	Y
ESTAGB1WB002861	380	173	193	(tgc)7	21	7	3	Y
ESTAGB1WB002861	380	125	139	(tgt)5	15	5	3	Y
ESTAGB1WB002861	380	155	172	(tgt)6	18	6	3	Y
ESTAGB1WB002861	380	46	60	(ttg)5	15	5	3	Y
ESTAGB1WB002879	113	1	27	(aat)9	27	9	3	N
ESTAGB1WB002885	380	1	15	(caa)5	15	5	3	N
ESTAGB1WB002922	340	124	156	(tga)11	33	11	3	Y
ESTAGB1WB002923	529	115	144	(cat)10	30	10	3	Y
ESTAGB1WB002941	1166	477	492	(ac)8	16	8	2	Y
ESTAGB1WB002994	393	157	171	(aag)5	15	5	3	Y
ESTAGB1WB002995	96	53	79	(aag)9	27	9	3	N
ESTAGB1WB003096	1438	1016	1039	(caa)8	24	8	3	Y
ESTAGB1WB003096	1438	579	593	(gac)5	15	5	3	Y
ESTAGB1WB003096	1438	1408	1427	(ttat)5	20	5	4	N
ESTAGB1WB003096	1438	1084	1107	(ttta)6	24	6	4	Y
ESTAGB1WB003097	518	429	470	(acg)14	42	14	3	Y
ESTAGB1WB003097	518	413	427	(gac)5	15	5	3	Y
ESTAGB1WB003097	518	485	511	(gac)9	27	9	3	N
ESTAGB1WB003098	991	545	562	(cgt)6	18	6	3	Y
ESTAGB1WB003100	427	186	239	(gac)18	54	18	3	Y
ESTAGB1WB003101	250	106	129	(tga)8	24	8	3	Y
ESTAGB1WB003102	195	61	93	(gtc)11	33	11	3	Y
ESTAGB1WB003102	195	98	124	(tcg)9	27	9	3	Y
ESTAGB1WB003102	195	38	58	(ttg)7	21	7	3	Y
ESTAGB1WB003318	444	296	310	(att)5	15	5	3	N
ESTAGB1WB003320	1833	1260	1274	(tta)5	15	5	3	Y
ESTAGB1WB003326	1588	449	472	(taa)8	24	8	3	Y
ESTAGB1WB003338	330	301	315	(taa)5	15	5	3	N
ESTAGB1WB003352	313	263	310	(taaa)12	48	12	4	N
ESTAGB1WB003353	911	25	72	(aat)16	48	16	3	N
ESTAGB1WB003353	911	250	264	(aat)5	15	5	3	Y
ESTAGB1WB003353	911	1	15	(taa)5	15	5	3	N
ESTAGB1WB003359	1166	122	136	(cca)5	15	5	3	Y
ESTAGB1WB003362	1405	1206	1226	(tat)7	21	7	3	Y
ESTAGB1WB003382	617	515	529	(att)5	15	5	3	Y
ESTAGB1WB003395	1439	558	572	(gca)5	15	5	3	Y
ESTAGB1WB003398	552	173	193	(aat)7	21	7	3	Y
ESTAGB1WB003403	1412	1356	1370	(aca)5	15	5	3	Y
ESTAGB1WB003424	541	460	474	(tta)5	15	5	3	Y
ESTAGB1WB003426	1361	648	662	(att)5	15	5	3	Y
ESTAGB1WB003426	1361	664	681	(tta)6	18	6	3	Y
ESTAGB1WB003444	1710	674	693	(at)10	20	10	2	Y
ESTAGB1WB003448	605	155	172	(taa)6	18	6	3	Y
ESTAGB1WB003461	497	153	185	(tat)11	33	11	3	Y
ESTAGB1WB003475	260	1	15	(att)5	15	5	3	N
ESTAGB1WB003478	1113	437	452	(ta)8	16	8	2	Y
ESTAGB1WB003484	1002	971	991	(aat)7	21	7	3	N
ESTAGB1WB003495	1040	496	513	(aat)6	18	6	3	Y
ESTAGB1WB003514	1369	1080	1097	(tta)6	18	6	3	N
ESTAGB1WB003531	726	695	710	(ta)8	16	8	2	N
ESTAGB1WB003539	2547	1898	1915	(at)9	18	9	2	Y
ESTAGB1WB003539	2547	1487	1501	(att)5	15	5	3	Y
ESTAGB1WB003543	1790	1452	1469	(att)6	18	6	3	Y
ESTAGB1WB003561	1315	897	917	(aat)7	21	7	3	Y
ESTAGB1WB003576	560	534	548	(aga)5	15	5	3	N
ESTAGB1WB003595	650	380	394	(ata)5	15	5	3	Y
ESTAGB1WB003601	2771	1781	1798	(tgt)6	18	6	3	Y
ESTAGB1WB003615	188	35	49	(tgg)5	15	5	3	Y
ESTAGB1WB003629	802	208	228	(aat)7	21	7	3	Y
ESTAGB1WB003671	1096	889	904	(at)8	16	8	2	N
ESTAGB1WB003698	764	434	454	(tat)7	21	7	3	Y
ESTAGB1WB003703	2402	10	25	(ta)8	16	8	2	N
ESTAGB1WB003733	1140	731	745	(ggc)5	15	5	3	Y
ESTAGB1WB003733	1140	784	798	(ttg)5	15	5	3	Y
ESTAGB1WB003746	690	116	130	(att)5	15	5	3	N
ESTAGB1WB003804	658	303	317	(ata)5	15	5	3	Y
ESTAGB1WB003840	1363	716	730	(att)5	15	5	3	Y
ESTAGB1WB003846	1182	1025	1039	(gtt)5	15	5	3	Y
ESTAGB1WB003846	1182	288	302	(tat)5	15	5	3	Y
ESTAGB1WB003848	1147	580	594	(aat)5	15	5	3	Y
ESTAGB1WB003854	1868	221	259	(ata)13	39	13	3	Y
ESTAGB1WB003854	1868	372	386	(att)5	15	5	3	Y
ESTAGB1WB003855	1210	131	148	(att)6	18	6	3	Y
ESTAGB1WB003855	1210	450	469	(tg)10	20	10	2	Y
ESTAGB1WB003856	459	261	284	(ata)8	24	8	3	Y
ESTAGB1WB003885	1559	615	630	(at)8	16	8	2	Y
ESTAGB1WB003886	338	188	208	(aat)7	21	7	3	Y
ESTAGB1WB003901	610	67	81	(taa)5	15	5	3	N
ESTAGB1WB003904	1003	51	74	(aaat)6	24	6	4	Y
ESTAGB1WB003917	598	254	271	(tat)6	18	6	3	Y
ESTAGB1WB003931	1367	1035	1052	(atc)6	18	6	3	Y
ESTAGB1WB003936	995	195	209	(gca)5	15	5	3	Y
ESTAGB1WB003953	1030	758	775	(tga)6	18	6	3	Y
ESTAGB1WB003959	805	788	805	(tta)6	18	6	3	N
ESTAGB1WB003975	905	709	729	(att)7	21	7	3	Y
ESTAGB1WB003975	905	69	83	(caa)5	15	5	3	N
ESTAGB1WB003975	905	807	830	(tat)8	24	8	3	Y
ESTAGB1WB003978	521	162	176	(taa)5	15	5	3	Y
ESTAGB1WB003984	1122	733	748	(ac)8	16	8	2	N
ESTAGB1WB003984	1122	462	485	(att)8	24	8	3	Y
ESTAGB1WB003984	1122	107	124	(taa)6	18	6	3	Y
ESTAGB1WB003984	1122	788	802	(tat)5	15	5	3	Y
ESTAGB1WB003995	887	592	609	(ac)9	18	9	2	Y
ESTAGB1WB004014	324	134	148	(tat)5	15	5	3	Y
ESTAGB1WB004025	1152	102	117	(at)8	16	8	2	Y
ESTAGB1WB004039	927	570	584	(aat)5	15	5	3	Y
ESTAGB1WB004040	951	849	869	(tat)7	21	7	3	Y
ESTAGB1WB004061	151	100	115	(ca)8	16	8	2	Y
ESTAGB1WB004083	398	80	103	(aat)8	24	8	3	N
ESTAGB1WB004098	623	151	165	(taa)5	15	5	3	N
ESTAGB1WB004115	530	25	44	(atac)5	20	5	4	N
ESTAGB1WB004121	2467	1936	1956	(tat)7	21	7	3	Y
ESTAGB1WB004128	667	184	198	(tta)5	15	5	3	Y
ESTAGB1WB004157	516	395	409	(gct)5	15	5	3	Y
ESTAGB1WB004157	516	478	504	(ttg)9	27	9	3	N
ESTAGB1WB004171	548	358	372	(acc)5	15	5	3	Y
ESTAGB1WB004197	577	93	113	(aat)7	21	7	3	N
ESTAGB1WB004198	482	216	230	(ata)5	15	5	3	Y
ESTAGB1WB004258	947	68	83	(ta)8	16	8	2	N
ESTAGB1WB004272	1110	1047	1066	(at)10	20	10	2	N
ESTAGB1WB004277	1688	1196	1210	(gaa)5	15	5	3	Y
ESTAGB1WB004292	1724	517	531	(ttc)5	15	5	3	Y
ESTAGB1WB004326	1088	538	552	(aat)5	15	5	3	Y
ESTAGB1WB004330	1463	692	706	(aca)5	15	5	3	Y
ESTAGB1WB004331	271	206	220	(ata)5	15	5	3	N
ESTAGB1WB004340	545	485	520	(ata)12	36	12	3	N
ESTAGB1WB004347	700	201	230	(aat)10	30	10	3	Y
ESTAGB1WB004347	700	579	596	(at)9	18	9	2	Y
ESTAGB1WB004347	700	241	261	(ata)7	21	7	3	Y
ESTAGB1WB004351	446	147	164	(tgt)6	18	6	3	Y
ESTAGB1WB004358	510	74	88	(aat)5	15	5	3	Y
ESTAGB1WB004362	586	132	146	(tta)5	15	5	3	Y
ESTAGB1WB004376	931	643	662	(tg)10	20	10	2	Y
ESTAGB1WB004380	1453	305	334	(aat)10	30	10	3	Y
ESTAGB1WB004382	1088	999	1019	(tgt)7	21	7	3	Y
ESTAGB1WB004396	2078	1342	1356	(tta)5	15	5	3	Y
ESTAGB1WB004403	1108	261	284	(att)8	24	8	3	Y
ESTAGB1WB004416	592	377	396	(attt)5	20	5	4	N
ESTAGB1WB004452	750	5	24	(at)10	20	10	2	N
ESTAGB1WB004464	415	353	370	(tta)6	18	6	3	Y
ESTAGB1WB004465	714	169	184	(ta)8	16	8	2	Y
ESTAGB1WB004473	709	61	75	(tca)5	15	5	3	Y
ESTAGB1WB004493	1483	192	207	(ta)8	16	8	2	Y
ESTAGB1WB004501	924	471	486	(ac)8	16	8	2	Y
ESTAGB1WB004501	924	219	233	(ata)5	15	5	3	Y
ESTAGB1WB004516	469	413	427	(aac)5	15	5	3	Y
ESTAGB1WB004518	1156	278	292	(agg)5	15	5	3	Y
ESTAGB1WB004519	1474	1047	1062	(at)8	16	8	2	Y
ESTAGB1WB004543	648	1	15	(tat)5	15	5	3	N
ESTAGB1WB004544	929	576	593	(att)6	18	6	3	Y
ESTAGB1WB004577	715	625	642	(att)6	18	6	3	Y
ESTAGB1WB004622	665	531	545	(tta)5	15	5	3	Y
ESTAGB1WB004639	1272	515	535	(tta)7	21	7	3	Y
ESTAGB1WB004652	567	308	331	(att)8	24	8	3	Y
ESTAGB1WB004654	975	251	265	(cag)5	15	5	3	Y
ESTAGB1WB004657	527	50	64	(att)5	15	5	3	Y
ESTAGB1WB004672	1294	949	966	(tat)6	18	6	3	Y
ESTAGB1WB004702	523	27	41	(tta)5	15	5	3	N
ESTAGB1WB004742	504	10	24	(att)5	15	5	3	N
ESTAGB1WB004749	632	30	47	(att)6	18	6	3	N
ESTAGB1WB004781	724	44	67	(taa)8	24	8	3	Y
ESTAGB1WB004799	791	725	745	(tat)7	21	7	3	N
ESTAGB1WB004806	499	420	437	(gac)6	18	6	3	Y
ESTAGB1WB004844	449	245	259	(att)5	15	5	3	Y
ESTAGB1WB004845	503	67	84	(tca)6	18	6	3	Y
ESTAGB1WB004846	474	267	281	(cgt)5	15	5	3	Y
ESTAGB1WB004878	1059	453	473	(ctt)7	21	7	3	Y
ESTAGB1WB004919	1092	455	481	(att)9	27	9	3	Y
ESTAGB1WB004919	1092	69	88	(ga)10	20	10	2	Y
ESTAGB1WB004919	1092	419	436	(tta)6	18	6	3	Y
ESTAGB1WB004958	289	1	15	(gtt)5	15	5	3	N
ESTAGB1WB005040	1265	502	516	(gaa)5	15	5	3	Y
ESTAGB1WB005045	538	481	495	(att)5	15	5	3	N
ESTAGB1WB005078	647	93	107	(tta)5	15	5	3	Y
ESTAGB1WB005097	811	233	253	(taa)7	21	7	3	Y
ESTAGB1WB005105	945	84	98	(tta)5	15	5	3	Y
ESTAGB1WB005109	345	192	206	(ctg)5	15	5	3	Y
ESTAGB1WB005116	252	1	18	(taa)6	18	6	3	N
ESTAGB1WB005131	966	750	776	(att)9	27	9	3	Y
ESTAGB1WB005156	1027	118	153	(act)12	36	12	3	Y
ESTAGB1WB005159	1361	528	542	(tta)5	15	5	3	Y
ESTAGB1WB005201	655	581	598	(tta)6	18	6	3	Y
ESTAGB1WB005202	582	415	432	(tat)6	18	6	3	Y
ESTAGB1WB005250	1039	369	388	(ca)10	20	10	2	Y
ESTAGB1WB005265	300	268	288	(att)7	21	7	3	N
ESTAGB1WB005297	1433	1411	1432	(at)11	22	11	2	N
ESTAGB1WB005322	307	187	201	(tta)5	15	5	3	Y
ESTAGB1WB005348	318	35	49	(tat)5	15	5	3	N
ESTAGB1WB005348	318	62	88	(tat)9	27	9	3	N
ESTAGB1WB005389	504	166	186	(att)7	21	7	3	Y
ESTAGB1WB005400	559	204	221	(att)6	18	6	3	Y
ESTAGB1WB005423	317	162	176	(cga)5	15	5	3	Y
ESTAGB1WB005443	908	734	748	(aat)5	15	5	3	Y
ESTAGB1WB005459	712	352	369	(aag)6	18	6	3	Y
ESTAGB1WB005478	669	221	244	(ata)8	24	8	3	Y
ESTAGB1WB005478	669	628	645	(ca)9	18	9	2	N
ESTAGB1WB005499	689	299	319	(aat)7	21	7	3	Y
ESTAGB1WB005502	736	588	611	(tta)8	24	8	3	Y
ESTAGB1WB005514	826	375	398	(agc)8	24	8	3	Y
ESTAGB1WB005521	786	115	138	(tca)8	24	8	3	Y
ESTAGB1WB005537	382	367	382	(ta)8	16	8	2	N
ESTAGB1WB005575	650	127	144	(aat)6	18	6	3	Y
ESTAGB1WB005581	486	7	26	(at)10	20	10	2	N
ESTAGB1WB005673	416	104	133	(att)10	30	10	3	Y
ESTAGB1WB005736	1296	981	1004	(att)8	24	8	3	Y
ESTAGB1WB005736	1296	857	877	(gcc)7	21	7	3	Y
ESTAGB1WB005758	629	337	357	(ata)7	21	7	3	Y
ESTAGB1WB005761	334	237	254	(tat)6	18	6	3	Y
ESTAGB1WB005763	409	386	400	(aag)5	15	5	3	N
ESTAGB1WB005776	474	201	221	(tat)7	21	7	3	Y
ESTAGB1WB005777	474	337	357	(tat)7	21	7	3	Y
ESTAGB1WB005785	1037	509	526	(tga)6	18	6	3	Y
ESTAGB1WB005789	493	371	385	(taa)5	15	5	3	N
ESTAGB1WB005796	645	544	558	(aat)5	15	5	3	N
ESTAGB1WB005818	323	251	268	(tat)6	18	6	3	Y
ESTAGB1WB005852	417	32	46	(att)5	15	5	3	N
ESTAGB1WB005869	514	450	464	(aat)5	15	5	3	N
ESTAGB1WB005888	472	367	381	(ata)5	15	5	3	Y
ESTAGB1WB005888	472	382	396	(att)5	15	5	3	Y
ESTAGB1WB005898	868	430	444	(aat)5	15	5	3	Y
ESTAGB1WB005918	302	65	79	(tgt)5	15	5	3	Y
ESTAGB1WB005928	788	712	729	(aat)6	18	6	3	N
ESTAGB1WB005928	788	731	748	(ata)6	18	6	3	N
ESTAGB1WB005928	788	591	605	(tta)5	15	5	3	Y
ESTAGB1WB005936	945	776	791	(ta)8	16	8	2	Y
ESTAGB1WB005940	1262	1079	1099	(tac)7	21	7	3	Y
ESTAGB1WB006006	383	180	197	(gat)6	18	6	3	Y
ESTAGB1WB006026	944	38	52	(tta)5	15	5	3	Y
ESTAGB1WB006103	812	91	108	(tta)6	18	6	3	Y
ESTAGB1WB006104	663	297	317	(att)7	21	7	3	Y
ESTAGB1WB006104	663	534	554	(tta)7	21	7	3	Y
ESTAGB1WB006127	299	261	278	(tat)6	18	6	3	N
ESTAGB1WB006138	617	522	542	(tta)7	21	7	3	Y
ESTAGB1WB006157	479	361	375	(tgc)5	15	5	3	Y
ESTAGB1WB006161	887	451	474	(ggt)8	24	8	3	Y
ESTAGB1WB006161	887	499	513	(ggt)5	15	5	3	Y
ESTAGB1WB006166	421	2	17	(ta)8	16	8	2	Y
ESTAGB1WB006175	372	195	209	(gac)5	15	5	3	Y
ESTAGB1WB006175	372	340	354	(taa)5	15	5	3	N
ESTAGB1WB006211	605	506	521	(ta)8	16	8	2	N
ESTAGB1WB006259	530	1	20	(ta)10	20	10	2	N
ESTAGB1WB006281	637	413	434	(ac)11	22	11	2	Y
ESTAGB1WB006298	443	347	366	(aaac)5	20	5	4	Y
ESTAGB1WB006309	507	281	313	(att)11	33	11	3	Y
ESTAGB1WB006312	382	214	228	(tta)5	15	5	3	N
ESTAGB1WB006338	702	630	656	(tta)9	27	9	3	N
ESTAGB1WB006342	755	577	594	(taa)6	18	6	3	Y
ESTAGB1WB006365	412	221	235	(tta)5	15	5	3	Y
ESTAGB1WB006383	450	37	51	(att)5	15	5	3	Y
ESTAGB1WB006396	630	459	476	(att)6	18	6	3	Y
ESTAGB1WB006396	630	429	446	(tta)6	18	6	3	Y
ESTAGB1WB006403	608	560	586	(tta)9	27	9	3	N
ESTAGB1WB006416	679	47	88	(ata)14	42	14	3	N
ESTAGB1WB006419	453	35	58	(ata)8	24	8	3	N
ESTAGB1WB006482	1148	509	526	(ata)6	18	6	3	Y
ESTAGB1WB006493	359	120	134	(aat)5	15	5	3	Y
ESTAGB1WB006511	368	323	340	(att)6	18	6	3	N
ESTAGB1WB006518	450	205	219	(tat)5	15	5	3	Y
ESTAGB1WB006528	452	203	220	(taa)6	18	6	3	Y
ESTAGB1WB006569	929	150	167	(at)9	18	9	2	Y
ESTAGB1WB006573	327	257	271	(ttg)5	15	5	3	N
ESTAGB1WB006588	444	238	255	(tta)6	18	6	3	Y
ESTAGB1WB006595	259	95	112	(ac)9	18	9	2	Y
ESTAGB1WB006599	648	194	214	(tta)7	21	7	3	Y
ESTAGB1WB006635	445	385	400	(at)8	16	8	2	N
ESTAGB1WB006653	622	320	335	(at)8	16	8	2	Y
ESTAGB1WB006656	440	348	365	(tat)6	18	6	3	N
ESTAGB1WB006666	423	296	313	(taa)6	18	6	3	Y
ESTAGB1WB006672	600	310	327	(aat)6	18	6	3	Y
ESTAGB1WB006703	441	421	440	(aaac)5	20	5	4	N
ESTAGB1WB006744	442	107	127	(att)7	21	7	3	Y
ESTAGB1WB006748	665	415	429	(ata)5	15	5	3	Y
ESTAGB1WB006760	461	130	154	(ttata)5	25	5	5	Y
ESTAGB1WB006775	440	398	413	(at)8	16	8	2	N
ESTAGB1WB006812	446	139	162	(taa)8	24	8	3	Y
ESTAGB1WB006826	327	205	237	(ata)11	33	11	3	Y
ESTAGB1WB006826	327	173	199	(taa)9	27	9	3	Y
ESTAGB1WB006839	676	538	558	(tca)7	21	7	3	Y
ESTAGB1WB006860	754	291	308	(tat)6	18	6	3	Y
ESTAGB1WB006866	418	130	147	(tat)6	18	6	3	N
ESTAGB1WB006871	421	401	415	(tat)5	15	5	3	N
ESTAGB1WB006875	601	358	372	(tat)5	15	5	3	Y
ESTAGB1WB006885	435	76	90	(tta)5	15	5	3	Y
ESTAGB1WB006896	437	87	101	(att)5	15	5	3	Y
ESTAGB1WB006904	403	387	401	(ata)5	15	5	3	N
ESTAGB1WB006948	889	422	448	(gat)9	27	9	3	Y
ESTAGB1WB006960	403	147	167	(tta)7	21	7	3	Y
ESTAGB1WB006963	303	234	248	(gtt)5	15	5	3	Y
ESTAGB1WB006988	273	82	99	(ata)6	18	6	3	Y
ESTAGB1WB006994	480	232	246	(aat)5	15	5	3	N
ESTAGB1WB006996	419	41	55	(taa)5	15	5	3	Y
ESTAGB1WB007040	657	405	419	(tga)5	15	5	3	Y
ESTAGB1WB007067	425	294	308	(tgg)5	15	5	3	Y
ESTAGB1WB007099	428	71	100	(ata)10	30	10	3	N
ESTAGB1WB007124	400	178	213	(tta)12	36	12	3	N
ESTAGB1WB007134	356	303	317	(tat)5	15	5	3	N
ESTAGB1WB007164	320	37	57	(tat)7	21	7	3	Y
ESTAGB1WB007164	320	209	223	(tat)5	15	5	3	Y
ESTAGB1WB007200	397	360	383	(taa)8	24	8	3	N
ESTAGB1WB007211	378	263	277	(tta)5	15	5	3	N
ESTAGB1WB007239	416	34	54	(aat)7	21	7	3	Y
ESTAGB1WB007298	416	201	215	(ata)5	15	5	3	Y
ESTAGB1WB007305	356	6	41	(tat)12	36	12	3	N
ESTAGB1WB007315	298	197	211	(att)5	15	5	3	N
ESTAGB1WB007348	454	300	319	(aaca)5	20	5	4	Y
ESTAGB1WB007348	454	161	181	(ata)7	21	7	3	Y
ESTAGB1WB007374	328	219	242	(ttg)8	24	8	3	Y
ESTAGB1WB007390	276	46	72	(att)9	27	9	3	N
ESTAGB1WB007432	436	408	434	(tat)9	27	9	3	N
ESTAGB1WB007435	372	221	238	(agt)6	18	6	3	Y
ESTAGB1WB007444	384	358	372	(tat)5	15	5	3	N
ESTAGB1WB007479	437	241	261	(tta)7	21	7	3	Y
ESTAGB1WB007513	429	61	78	(ata)6	18	6	3	N
ESTAGB1WB007513	429	86	115	(ata)10	30	10	3	N
ESTAGB1WB007521	391	54	71	(tta)6	18	6	3	Y
ESTAGB1WB007549	401	125	139	(ata)5	15	5	3	Y
ESTAGB1WB007588	335	115	129	(atc)5	15	5	3	Y
ESTAGB1WB007597	385	193	228	(ata)12	36	12	3	N
ESTAGB1WB007599	299	249	263	(att)5	15	5	3	N
ESTAGB1WB007637	393	348	363	(at)8	16	8	2	Y
ESTAGB1WB007657	347	35	58	(acat)6	24	6	4	N
ESTAGB1WB007657	347	15	34	(at)10	20	10	2	N
ESTAGB1WB007661	365	148	165	(ta)9	18	9	2	Y
ESTAGB1WB007665	331	243	278	(ata)12	36	12	3	N
ESTAGB1WB007689	385	237	272	(tat)12	36	12	3	Y
ESTAGB1WB007754	277	26	43	(taa)6	18	6	3	N
ESTAGB1WB007762	279	57	74	(tat)6	18	6	3	Y
ESTAGB1WB007766	329	198	215	(att)6	18	6	3	Y
ESTAGB1WB007767	319	33	58	(ac)13	26	13	2	N
ESTAGB1WB007806	349	85	102	(at)9	18	9	2	Y
ESTAGB1WB007808	308	27	47	(ata)7	21	7	3	N
ESTAGB1WB007813	292	49	72	(tat)8	24	8	3	N
ESTAGB1WB007813	292	119	136	(tat)6	18	6	3	Y
ESTAGB1WB007813	292	147	170	(tat)8	24	8	3	Y
ESTAGB1WB007824	282	177	196	(ta)10	20	10	2	N
ESTAGB1WB007826	374	245	259	(taa)5	15	5	3	Y
ESTAGB1WB007841	517	483	497	(aat)5	15	5	3	N
ESTAGB1WB007865	304	154	171	(tat)6	18	6	3	Y
ESTAGB1WB007899	308	109	126	(aat)6	18	6	3	Y
ESTAGB1WB007899	308	281	307	(taa)9	27	9	3	N
ESTAGB1WB007902	298	217	243	(tta)9	27	9	3	N
ESTAGB1WB007906	474	315	335	(taa)7	21	7	3	N
ESTAGB1WB007957	333	288	317	(ata)10	30	10	3	N
ESTAGB1WB007991	301	80	94	(gat)5	15	5	3	Y
ESTAGB1WB008031	306	197	226	(aat)10	30	10	3	Y
ESTAGB1WB008031	306	245	268	(ata)8	24	8	3	Y
ESTAGB1WB008042	321	208	225	(aat)6	18	6	3	Y
ESTAGB1WB008053	280	109	124	(at)8	16	8	2	Y
ESTAGB1WB008057	302	178	192	(ata)5	15	5	3	Y
ESTAGB1WB008071	308	127	165	(ata)13	39	13	3	N
ESTAGB1WB008075	302	224	238	(tta)5	15	5	3	N
ESTAGB1WB008077	281	27	41	(tat)5	15	5	3	N
ESTAGB1WB008096	271	237	251	(tat)5	15	5	3	N
ESTAGB1WB008098	264	89	104	(ta)8	16	8	2	N
ESTAGB1WB008200	115	1	16	(tg)8	16	8	2	N
ESTAGB1WB008231	416	44	61	(ac)9	18	9	2	Y
ESTAGB1WB008261	119	61	78	(ata)6	18	6	3	Y
ESTAGB1WB008263	68	11	25	(att)5	15	5	3	N
ESTAGB1WB008264	54	5	20	(ta)8	16	8	2	N
ESTAGB1WB008328	523	4	18	(tta)5	15	5	3	N
ESTAGB1WB008390	354	337	354	(at)9	18	9	2	N
ESTAGB1WB008405	196	179	196	(tac)6	18	6	3	N
ESTAGB1WB008483	358	292	311	(aaat)5	20	5	4	N
ESTAGB1WB008517	529	495	509	(ata)5	15	5	3	Y
ESTAGB1WB008528	454	282	297	(at)8	16	8	2	Y
ESTAGB1WB008535	93	70	90	(ata)7	21	7	3	N
ESTAGB1WB008586	168	89	106	(aat)6	18	6	3	N
ESTAGB1WB008658	311	284	310	(aat)9	27	9	3	N
ESTAGB1WB008696	418	202	217	(ta)8	16	8	2	Y
ESTAGB1WB008709	574	551	571	(gta)7	21	7	3	N
ESTAGB1WB008713	204	180	194	(tgt)5	15	5	3	N
ESTAGB1WB008735	435	15	32	(at)9	18	9	2	N
ESTAGB1WB008809	442	40	63	(ata)8	24	8	3	N
ESTAGB1WB008848	404	122	139	(aat)6	18	6	3	Y
ESTAGB1WB008911	430	26	40	(taa)5	15	5	3	N
ESTAGB1WB008916	200	171	191	(tat)7	21	7	3	N
ESTAGB1WB008994	132	110	129	(tatt)5	20	5	4	N
ESTAGB1WB009070	384	251	265	(aca)5	15	5	3	Y
ESTAGB1WB009070	384	299	313	(aca)5	15	5	3	Y
ESTAGB1WB009075	357	225	242	(tta)6	18	6	3	Y
ESTAGB1WB009075	357	205	224	(ttta)5	20	5	4	Y
ESTAGB1WB009145	382	335	349	(tta)5	15	5	3	N
ESTAGB1WB009173	464	276	293	(cga)6	18	6	3	Y
ESTAGB1WB009182	513	354	380	(cca)9	27	9	3	Y
ESTAGB1WB009230	401	228	245	(at)9	18	9	2	Y
ESTAGB1WB009246	360	190	207	(ca)9	18	9	2	Y
ESTAGB1WB009246	360	96	116	(taa)7	21	7	3	Y
ESTAGB1WB009279	512	455	469	(aat)5	15	5	3	N
ESTAGB1WB009298	324	146	163	(aat)6	18	6	3	N
ESTAGB1WB009317	481	131	155	(actat)5	25	5	5	Y
ESTAGB1WB009355	486	1	20	(ttta)5	20	5	4	N
ESTAGB1WB009371	409	45	65	(tat)7	21	7	3	N
ESTAGB1WB009371	409	126	140	(tat)5	15	5	3	Y
ESTAGB1WB009382	403	56	73	(tat)6	18	6	3	N
ESTAGB1WB009449	416	242	259	(tat)6	18	6	3	Y
ESTAGB1WB009476	399	127	144	(aat)6	18	6	3	Y
ESTAGB1WB009476	399	184	198	(taa)5	15	5	3	Y
ESTAGB1WB009481	223	181	198	(tg)9	18	9	2	N
ESTAGB1WB009521	190	161	175	(aat)5	15	5	3	N
ESTAGB1WB009529	312	4	18	(tat)5	15	5	3	N
ESTAGB1WB009539	513	461	475	(aac)5	15	5	3	N
ESTAGB1WB009546	415	291	311	(tat)7	21	7	3	Y
ESTAGB1WB009604	193	120	134	(gaa)5	15	5	3	Y
ESTAGB1WB009610	360	56	71	(at)8	16	8	2	N
ESTAGB1WB009624	263	50	69	(at)10	20	10	2	N
ESTAGB1WB009680	256	194	211	(ta)9	18	9	2	Y
ESTAGB1WB009681	376	230	244	(taa)5	15	5	3	Y
ESTAGB1WB009740	468	114	131	(at)9	18	9	2	N
ESTAGB1WB009761	55	40	55	(ta)8	16	8	2	N
ESTAGB1WB009793	333	194	211	(ac)9	18	9	2	Y
ESTAGB1WB009795	482	13	30	(cgt)6	18	6	3	N
ESTAGB1WB009816	510	44	58	(att)5	15	5	3	Y
ESTAGB1WB009816	510	62	76	(tat)5	15	5	3	Y
ESTAGB1WB009867	334	118	138	(tca)7	21	7	3	Y
ESTAGB1WB009867	334	172	186	(tca)5	15	5	3	Y
ESTAGB1WB009871	416	359	373	(aat)5	15	5	3	Y
ESTAGB1WB009875	454	19	36	(gtc)6	18	6	3	N
ESTAGB1WB009905	438	2	21	(ac)10	20	10	2	Y
ESTAGB1WB009936	387	9	23	(att)5	15	5	3	N
ESTAGB1WB009940	502	241	258	(gtc)6	18	6	3	Y
ESTAGB1WB009962	421	328	342	(cag)5	15	5	3	Y
ESTAGB1WB009979	469	213	230	(atg)6	18	6	3	Y
ESTAGB1WB010001	292	55	76	(ta)11	22	11	2	Y
ESTAGB1WB010008	314	80	97	(caa)6	18	6	3	Y
ESTAGB1WB010044	241	182	202	(tta)7	21	7	3	Y
ESTAGB1WB010053	212	48	65	(ata)6	18	6	3	Y
ESTAGB1WB010053	212	171	194	(ta)12	24	12	2	N
ESTAGB1WB010070	508	467	481	(aat)5	15	5	3	N
ESTAGB1WB010070	508	484	498	(taa)5	15	5	3	N
ESTAGB1WB010202	469	56	70	(ata)5	15	5	3	N
ESTAGB1WB010207	475	147	164	(tat)6	18	6	3	N
ESTAGB1WB010212	314	138	152	(tta)5	15	5	3	Y
ESTAGB1WB010223	454	410	424	(ata)5	15	5	3	N
ESTAGB1WB010262	461	175	198	(aat)8	24	8	3	Y
ESTAGB1WB010298	310	169	186	(at)9	18	9	2	Y
ESTAGB1WB010326	288	1	26	(ca)13	26	13	2	N
ESTAGB1WB010380	449	338	352	(tat)5	15	5	3	Y
ESTAGB1WB010387	429	378	392	(gtc)5	15	5	3	Y
ESTAGB1WB010475	426	134	148	(tta)5	15	5	3	Y
ESTAGB1WB010478	438	271	288	(aat)6	18	6	3	Y
ESTAGB1WB010483	186	118	135	(at)9	18	9	2	N
ESTAGB1WB010484	74	4	19	(ta)8	16	8	2	N
ESTAGB1WB010505	576	503	526	(aca)8	24	8	3	Y
ESTAGB1WB010505	576	544	561	(cag)6	18	6	3	N
ESTAGB1WB010620	451	13	27	(ata)5	15	5	3	N
ESTAGB1WB010625	488	168	182	(aat)5	15	5	3	Y
ESTAGB1WB010642	495	125	157	(tta)11	33	11	3	Y
ESTAGB1WB010673	378	207	227	(caa)7	21	7	3	Y
ESTAGB1WB010678	50	6	21	(at)8	16	8	2	N
ESTAGB1WB010680	413	313	330	(gaa)6	18	6	3	Y
ESTAGB1WB010719	409	363	386	(aat)8	24	8	3	N
ESTAGB1WB010752	465	295	318	(aat)8	24	8	3	Y
ESTAGB1WB010767	477	261	276	(ac)8	16	8	2	Y
ESTAGB1WB010784	244	138	157	(atac)5	20	5	4	Y
ESTAGB1WB010788	243	176	197	(at)11	22	11	2	N
ESTAGB1WB010789	382	120	137	(tgc)6	18	6	3	Y
ESTAGB1WB010819	387	58	78	(ata)7	21	7	3	N
ESTAGB1WB010819	387	213	236	(tat)8	24	8	3	Y
ESTAGB1WB010825	505	487	502	(ac)8	16	8	2	N
ESTAGB1WB010825	505	450	464	(gcg)5	15	5	3	Y
ESTAGB1WB010825	505	363	377	(ttg)5	15	5	3	Y
ESTAGB1WB010851	484	398	415	(tgc)6	18	6	3	Y
ESTAGB1WB010854	505	35	52	(ccg)6	18	6	3	Y
ESTAGB1WB010880	230	153	167	(ata)5	15	5	3	Y
ESTAGB1WB010930	457	133	153	(aat)7	21	7	3	Y
ESTAGB1WB010962	332	87	104	(aat)6	18	6	3	Y
ESTAGB1WB010963	452	74	89	(at)8	16	8	2	Y
ESTAGB1WB010997	449	428	445	(aag)6	18	6	3	N
ESTAGB1WB010997	449	153	167	(gta)5	15	5	3	Y
ESTAGB1WB010997	449	10	27	(gtc)6	18	6	3	N
ESTAGB1WB011033	325	177	194	(ta)9	18	9	2	Y
ESTAGB1WB011040	413	9	28	(ta)10	20	10	2	N
ESTAGB1WB011049	372	206	223	(cat)6	18	6	3	Y
ESTAGB1WB011049	372	97	120	(tca)8	24	8	3	Y
ESTAGB1WB011053	439	299	323	(atgta)5	25	5	5	Y
ESTAGB1WB011068	397	134	148	(tga)5	15	5	3	Y
ESTAGB1WB011122	522	19	45	(tat)9	27	9	3	N
ESTAGB1WB011153	310	116	130	(att)5	15	5	3	N
ESTAGB1WB011179	380	265	279	(ata)5	15	5	3	Y
ESTAGB1WB011208	548	355	369	(aat)5	15	5	3	Y
ESTAGB1WB011253	391	365	379	(ttc)5	15	5	3	N
ESTAGB1WB011259	511	218	233	(at)8	16	8	2	Y
ESTAGB1WB011261	475	148	162	(taa)5	15	5	3	Y
ESTAGB1WB011294	231	32	51	(tatt)5	20	5	4	N
ESTAGB1WB011354	349	70	87	(tag)6	18	6	3	Y
ESTAGB1WB011392	219	205	219	(tta)5	15	5	3	N
ESTAGB1WB011404	244	222	241	(ga)10	20	10	2	N
ESTAGB1WB011421	455	40	54	(att)5	15	5	3	N
ESTAGB1WB011463	485	410	430	(cga)7	21	7	3	Y
ESTAGB1WB011465	439	90	104	(agt)5	15	5	3	N
ESTAGB1WB011465	439	135	152	(ttg)6	18	6	3	N
ESTAGB1WB011495	321	121	135	(att)5	15	5	3	Y
ESTAGB1WB011512	590	198	212	(aat)5	15	5	3	Y
ESTAGB1WB011535	474	106	120	(gtt)5	15	5	3	Y
ESTAGB1WB011542	433	31	51	(cgt)7	21	7	3	Y
ESTAGB1WB011559	314	194	208	(ata)5	15	5	3	Y
ESTAGB1WB011571	296	30	47	(tca)6	18	6	3	N
ESTAGB1WB011584	103	17	34	(tta)6	18	6	3	N
ESTAGB1WB011591	479	52	66	(taa)5	15	5	3	N
ESTAGB1WB011629	383	281	295	(ctt)5	15	5	3	Y
ESTAGB1WB011670	89	65	89	(taatt)5	25	5	5	N
ESTAGB1WB011693	530	340	354	(ata)5	15	5	3	Y
ESTAGB1WB011699	344	228	251	(att)8	24	8	3	Y
ESTAGB1WB011721	489	388	407	(at)10	20	10	2	N
ESTAGB1WB011733	483	268	297	(taa)10	30	10	3	Y
ESTAGB1WB011739	335	115	130	(at)8	16	8	2	N
ESTAGB1WB011753	414	259	273	(tat)5	15	5	3	Y
ESTAGB1WB011753	414	301	315	(tat)5	15	5	3	N
ESTAGB1WB011760	91	65	90	(at)13	26	13	2	N
ESTAGB1WB011772	224	176	199	(at)12	24	12	2	N
ESTAGB1WB011777	344	329	343	(ata)5	15	5	3	N
ESTAGB1WB011777	344	293	328	(ta)18	36	18	2	N
ESTAGB1WB011784	516	434	449	(ac)8	16	8	2	Y
ESTAGB1WB011794	454	24	41	(cag)6	18	6	3	Y
ESTAGB1WB011827	431	373	390	(at)9	18	9	2	N
ESTAGB1WB011845	380	143	158	(ta)8	16	8	2	Y
ESTAGB1WB011850	535	490	507	(att)6	18	6	3	N
ESTAGB1WB011859	501	480	500	(att)7	21	7	3	N
ESTAGB1WB011929	411	267	287	(gtt)7	21	7	3	Y
ESTAGB1WB011970	426	178	192	(tat)5	15	5	3	Y
ESTAGB1WB011982	490	335	349	(tta)5	15	5	3	Y
ESTAGB1WB011985	330	60	74	(tta)5	15	5	3	Y
ESTAGB1WB011988	373	189	218	(atgaaa)5	30	5	6	Y
ESTAGB1WB011990	93	32	46	(tta)5	15	5	3	N
ESTAGB1WB011997	396	372	393	(ta)11	22	11	2	N
ESTAGB1WB012011	391	3	23	(aat)7	21	7	3	N
ESTAGB1WB012023	482	140	154	(aat)5	15	5	3	Y
ESTAGB1WB012024	461	446	460	(tat)5	15	5	3	N
ESTAGB1WB012069	473	80	100	(aat)7	21	7	3	Y
ESTAGB1WB012111	352	161	182	(at)11	22	11	2	Y
ESTAGB1WB012157	415	138	161	(ata)8	24	8	3	Y
ESTAGB1WB012239	451	230	251	(tg)11	22	11	2	Y
ESTAGB1WB012266	230	79	93	(tta)5	15	5	3	Y
ESTAGB1WB012283	509	280	294	(tgg)5	15	5	3	Y
ESTAGB1WB012286	231	70	87	(tta)6	18	6	3	N
ESTAGB1WB012297	306	277	302	(ta)13	26	13	2	N
ESTAGB1WB012323	214	65	79	(tta)5	15	5	3	Y
ESTAGB1WB012394	305	151	172	(ta)11	22	11	2	Y
ESTAGB1WB012487	453	206	220	(att)5	15	5	3	Y
ESTAGB1WB012542	459	16	30	(tgt)5	15	5	3	N
ESTAGB1WB012560	383	14	31	(ata)6	18	6	3	N
ESTAGB1WB012560	383	85	99	(taa)5	15	5	3	Y
ESTAGB1WB012560	383	232	251	(tttg)5	20	5	4	Y
ESTAGB1WB012573	335	224	244	(caa)7	21	7	3	Y
ESTAGB1WB012574	450	220	234	(ctg)5	15	5	3	Y
ESTAGB1WB012574	450	237	260	(gtt)8	24	8	3	Y
ESTAGB1WB012579	444	23	40	(tct)6	18	6	3	N
ESTAGB1WB012613	302	22	36	(taa)5	15	5	3	N
ESTAGB1WB012616	384	367	382	(at)8	16	8	2	N
ESTAGB1WB012624	86	47	76	(at)15	30	15	2	N
ESTAGB1WB012669	526	85	99	(cgt)5	15	5	3	Y
ESTAGB1WB012719	429	361	375	(gct)5	15	5	3	N
ESTAGB1WB012721	200	118	141	(aac)8	24	8	3	N
ESTAGB1WB012721	200	94	114	(aat)7	21	7	3	N
ESTAGB1WB012724	395	189	206	(tat)6	18	6	3	Y
ESTAGB1WB012749	326	68	85	(att)6	18	6	3	Y
ESTAGB1WB012781	239	97	111	(taa)5	15	5	3	Y
ESTAGB1WB012836	242	225	242	(at)9	18	9	2	N
ESTAGB1WB012887	131	48	65	(at)9	18	9	2	N
ESTAGB1WB012889	349	82	97	(at)8	16	8	2	Y
ESTAGB1WB012889	349	311	332	(at)11	22	11	2	N
ESTAGB1WB012919	192	87	107	(taa)7	21	7	3	Y
ESTAGB1WB012919	192	114	134	(taa)7	21	7	3	Y
ESTAGB1WB012936	317	58	73	(ca)8	16	8	2	Y
ESTAGB1WB012940	323	220	249	(ac)15	30	15	2	Y
ESTAGB1WB012951	464	274	288	(tat)5	15	5	3	Y
ESTAGB1WB012982	415	200	223	(gtc)8	24	8	3	Y
ESTAGB1WB013008	423	9	23	(att)5	15	5	3	N
ESTAGB1WB013025	407	236	257	(ta)11	22	11	2	Y
ESTAGB1WB013027	516	24	39	(at)8	16	8	2	N
ESTAGB1WB013027	516	478	493	(ta)8	16	8	2	N
ESTAGB1WB013044	481	92	107	(at)8	16	8	2	Y
ESTAGB1WB013074	509	231	246	(ta)8	16	8	2	Y
ESTAGB1WB013087	540	53	76	(taa)8	24	8	3	N
ESTAGB1WB013117	476	214	228	(aat)5	15	5	3	Y
ESTAGB1WB013127	325	281	298	(aac)6	18	6	3	N
ESTAGB1WB013142	477	375	389	(ata)5	15	5	3	Y
ESTAGB1WB013206	264	24	38	(gac)5	15	5	3	Y
ESTAGB1WB013224	384	238	252	(tta)5	15	5	3	Y
ESTAGB1WB013230	393	366	391	(at)13	26	13	2	N
ESTAGB1WB013333	405	261	278	(at)9	18	9	2	Y
ESTAGB1WB013399	376	1	18	(gtt)6	18	6	3	N
ESTAGB1WB013459	463	447	462	(ac)8	16	8	2	N
ESTAGB1WB013478	81	63	80	(gt)9	18	9	2	N
ESTAGB1WB013521	337	211	228	(at)9	18	9	2	Y
ESTAGB1WB013539	386	55	75	(ata)7	21	7	3	Y
ESTAGB1WB013541	497	469	483	(aat)5	15	5	3	N
ESTAGB1WB013542	443	163	186	(ccg)8	24	8	3	Y
ESTAGB1WB013562	61	37	56	(atac)5	20	5	4	N
ESTAGB1WB013577	266	175	198	(ata)8	24	8	3	Y
ESTAGB1WB013581	369	267	296	(att)10	30	10	3	N
ESTAGB1WB013683	348	22	48	(tat)9	27	9	3	N
ESTAGB1WB013711	434	50	67	(att)6	18	6	3	N
ESTAGB1WB013711	434	347	364	(taa)6	18	6	3	N
ESTAGB1WB013729	204	177	194	(at)9	18	9	2	N
ESTAGB1WB013731	220	179	199	(aat)7	21	7	3	Y
ESTAGB1WB013793	189	141	166	(ta)13	26	13	2	N
ESTAGB1WB013817	74	13	27	(att)5	15	5	3	N
ESTAGB1WB013827	782	686	705	(gtac)5	20	5	4	N
ESTAGB1WB013827	782	662	685	(tacg)6	24	6	4	N
ESTAGB1WB013884	442	45	71	(tta)9	27	9	3	Y
ESTAGB1WB013903	420	122	136	(cca)5	15	5	3	Y
ESTAGB1WB013908	236	137	160	(taa)8	24	8	3	Y
ESTAGB1WB013910	460	359	373	(ata)5	15	5	3	Y
ESTAGB1WB013911	434	213	242	(att)10	30	10	3	Y
ESTAGB1WB013949	509	141	170	(tta)10	30	10	3	Y
ESTAGB1WB013962	368	209	223	(aac)5	15	5	3	Y
ESTAGB1WB013967	477	1	18	(att)6	18	6	3	N
ESTAGB1WB013990	424	386	400	(ata)5	15	5	3	N
ESTAGB1WB013997	318	81	98	(at)9	18	9	2	N
ESTAGB1WB013997	318	127	147	(tat)7	21	7	3	N
ESTAGB1WB014031	142	97	116	(aaat)5	20	5	4	N
ESTAGB1WB014123	110	80	105	(ta)13	26	13	2	N
ESTAGB1WB014130	413	309	323	(tta)5	15	5	3	Y
ESTAGB1WB014248	312	236	253	(cg)9	18	9	2	Y
ESTAGB1WB014248	312	283	312	(gt)15	30	15	2	N
ESTAGB1WB014248	312	254	281	(tg)14	28	14	2	Y
ESTAGB1WB014337	345	231	257	(att)9	27	9	3	Y
ESTAGB1WB014362	373	306	327	(tg)11	22	11	2	Y
ESTAGB1WB014364	387	369	384	(ta)8	16	8	2	N
ESTAGB1WB014385	410	21	41	(ata)7	21	7	3	N
ESTAGB1WB014385	410	1	15	(taa)5	15	5	3	N
ESTAGB1WB014421	420	81	96	(ta)8	16	8	2	Y
ESTAGB1WB014449	363	101	124	(aat)8	24	8	3	Y
ESTAGB1WB014484	406	259	274	(ta)8	16	8	2	Y
ESTAGB1WB014484	406	206	223	(tat)6	18	6	3	Y
ESTAGB1WB014497	491	456	471	(ta)8	16	8	2	N
ESTAGB1WB014499	373	198	212	(tat)5	15	5	3	Y
ESTAGB1WB014541	61	1	18	(att)6	18	6	3	N
ESTAGB1WB014566	514	113	130	(att)6	18	6	3	Y
ESTAGB1WB014576	377	349	364	(at)8	16	8	2	N
ESTAGB1WB014592	325	60	95	(ata)12	36	12	3	Y
ESTAGB1WB014605	375	337	352	(at)8	16	8	2	N
ESTAGB1WB014611	501	75	98	(aat)8	24	8	3	N
ESTAGB1WB014612	309	94	120	(tta)9	27	9	3	Y
ESTAGB1WB014633	313	4	19	(ta)8	16	8	2	N
ESTAGB1WB014637	413	126	143	(ta)9	18	9	2	Y
ESTAGB1WB014651	303	129	144	(at)8	16	8	2	Y
ESTAGB1WB014651	303	61	75	(ata)5	15	5	3	N
ESTAGB1WB014653	427	301	315	(gca)5	15	5	3	Y
ESTAGB1WB014662	457	134	148	(aat)5	15	5	3	Y
ESTAGB1WB014669	387	252	284	(tta)11	33	11	3	Y
ESTAGB1WB014690	193	127	154	(ta)14	28	14	2	N
ESTAGB1WB014693	311	165	180	(ta)8	16	8	2	N
ESTAGB1WB014771	414	383	400	(tat)6	18	6	3	N
ESTAGB1WB014771	414	356	376	(tta)7	21	7	3	N
ESTAGB1WB014920	130	109	130	(at)11	22	11	2	N
ESTAGB1WB014929	355	254	274	(ata)7	21	7	3	N
ESTAGB1WB014987	410	338	358	(tta)7	21	7	3	N
ESTAGB1WB015056	348	332	346	(aat)5	15	5	3	N
ESTAGB1WB015109	448	84	101	(at)9	18	9	2	Y
ESTAGB1WB015129	484	382	401	(ta)10	20	10	2	N
ESTAGB1WB015129	484	418	456	(tat)13	39	13	3	N
ESTAGB1WB015182	123	93	114	(ta)11	22	11	2	N
ESTAGB1WB015183	331	115	129	(tat)5	15	5	3	N
ESTAGB1WB015183	331	185	199	(tat)5	15	5	3	N
ESTAGB1WB015212	419	63	77	(att)5	15	5	3	Y
ESTAGB1WB015233	414	301	315	(acg)5	15	5	3	Y
ESTAGB1WB015290	479	114	131	(aat)6	18	6	3	N
ESTAGB1WB015290	479	449	463	(aat)5	15	5	3	N
ESTAGB1WB015290	479	417	431	(taa)5	15	5	3	N
ESTAGB1WB015292	232	117	131	(aat)5	15	5	3	N
ESTAGB1WB015292	232	135	149	(aat)5	15	5	3	N
ESTAGB1WB015389	182	61	78	(ta)9	18	9	2	N
ESTAGB1WB015427	319	144	158	(tat)5	15	5	3	Y
ESTAGB1WB015436	465	341	355	(aat)5	15	5	3	Y
ESTAGB1WB015438	345	125	139	(taa)5	15	5	3	N
ESTAGB1WB015500	401	58	75	(taa)6	18	6	3	N
ESTAGB1WB015523	264	243	262	(at)10	20	10	2	N
ESTAGB1WB015560	411	140	154	(ata)5	15	5	3	Y
ESTAGB1WB015563	336	112	127	(at)8	16	8	2	Y
ESTAGB1WB015605	168	72	89	(at)9	18	9	2	Y
ESTAGB1WB015608	404	341	358	(aat)6	18	6	3	N
ESTAGB1WB015608	404	381	404	(aat)8	24	8	3	N
ESTAGB1WB015608	404	236	253	(ta)9	18	9	2	N
ESTAGB1WB015608	404	324	338	(tag)5	15	5	3	N
ESTAGB1WB015630	358	293	320	(ac)14	28	14	2	Y
ESTAGB1WB015630	358	182	205	(tat)8	24	8	3	Y
ESTAGB1WB015649	447	17	34	(acc)6	18	6	3	N
ESTAGB1WB015660	332	24	41	(ata)6	18	6	3	N
ESTAGB1WB015660	332	1	21	(taa)7	21	7	3	N
ESTAGB1WB015713	299	10	24	(tat)5	15	5	3	N
ESTAGB1WB015732	357	265	282	(aat)6	18	6	3	Y
ESTAGB1WB015761	362	267	287	(att)7	21	7	3	Y
ESTAGB1WB015767	379	52	72	(ata)7	21	7	3	Y
ESTAGB1WB015767	379	86	100	(taa)5	15	5	3	Y
ESTAGB1WB015767	379	113	127	(taa)5	15	5	3	Y
ESTAGB1WB015771	392	273	288	(at)8	16	8	2	Y
ESTAGB1WB015784	172	85	100	(ta)8	16	8	2	N
ESTAGB1WB015937	116	73	88	(at)8	16	8	2	N
ESTAGB1WB015962	323	299	313	(ata)5	15	5	3	N
ESTAGB1WB016036	463	201	227	(tta)9	27	9	3	Y
ESTAGB1WB016036	463	429	461	(tta)11	33	11	3	N
ESTAGB1WB016038	352	54	80	(ata)9	27	9	3	N
ESTAGB1WB016038	352	1	15	(taa)5	15	5	3	N
ESTAGB1WB016046	367	52	71	(acat)5	20	5	4	N
ESTAGB1WB016107	209	187	207	(cgc)7	21	7	3	N
ESTAGB1WB016108	462	304	324	(aat)7	21	7	3	Y
ESTAGB1WB016133	213	111	131	(att)7	21	7	3	Y
ESTAGB1WB016138	373	194	208	(tta)5	15	5	3	Y
ESTAGB1WB016146	227	132	149	(tat)6	18	6	3	Y
ESTAGB1WB016159	235	150	164	(tat)5	15	5	3	N
ESTAGB1WB016185	371	352	369	(aat)6	18	6	3	N
ESTAGB1WB016197	385	354	368	(tta)5	15	5	3	N
ESTAGB1WB016218	411	76	93	(gac)6	18	6	3	Y
ESTAGB1WB016234	403	332	346	(taa)5	15	5	3	Y
ESTAGB1WB016263	96	73	93	(ata)7	21	7	3	N
ESTAGB1WB016265	237	213	236	(ta)12	24	12	2	N
ESTAGB1WB016274	305	145	164	(ttat)5	20	5	4	Y
ESTAGB1WB016288	333	301	321	(tat)7	21	7	3	N
ESTAGB1WB016300	416	394	415	(at)11	22	11	2	N
ESTAGB1WB016308	345	1	30	(aat)10	30	10	3	N
ESTAGB1WB016313	105	70	85	(ta)8	16	8	2	N
ESTAGB1WB016378	65	6	21	(at)8	16	8	2	N
ESTAGB1WB016560	386	188	202	(taa)5	15	5	3	Y
ESTAGB1WB016597	337	39	53	(gac)5	15	5	3	N
ESTAGB1WB016611	207	25	48	(taa)8	24	8	3	N
ESTAGB1WB016612	232	58	75	(ac)9	18	9	2	Y
ESTAGB1WB016624	366	12	26	(aag)5	15	5	3	N
ESTAGB1WB016640	331	138	155	(aat)6	18	6	3	Y
ESTAGB1WB016649	128	64	81	(taa)6	18	6	3	N
ESTAGB1WB016655	255	26	51	(tg)13	26	13	2	N
ESTAGB1WB016750	446	1	18	(aac)6	18	6	3	N
ESTAGB1WB016756	532	507	530	(gac)8	24	8	3	N
ESTAGB1WB016773	357	132	152	(tta)7	21	7	3	N
ESTAGB1WB016775	522	427	447	(ata)7	21	7	3	Y
ESTAGB1WB016789	157	15	35	(aat)7	21	7	3	N
ESTAGB1WB016822	196	129	146	(att)6	18	6	3	N
ESTAGB1WB016822	196	147	167	(tat)7	21	7	3	N
ESTAGB1WB016921	71	51	66	(at)8	16	8	2	N
ESTAGB1WB017040	196	176	191	(ta)8	16	8	2	N
ESTAGB1WB017056	90	73	90	(ta)9	18	9	2	N
ESTAGB1WB017075	242	192	211	(ttat)5	20	5	4	N
ESTAGB1WB017079	208	27	46	(ta)10	20	10	2	N
ESTAGB1WB017083	478	103	120	(att)6	18	6	3	Y
ESTAGB1WB017168	483	110	124	(aat)5	15	5	3	Y
ESTAGB1WB017168	483	354	374	(aat)7	21	7	3	N
ESTAGB1WB017219	226	206	223	(at)9	18	9	2	N
ESTAGB1WB017247	186	110	124	(taa)5	15	5	3	N
ESTAGB1WB017276	225	144	165	(ta)11	22	11	2	Y
ESTAGB1WB017285	91	41	56	(at)8	16	8	2	N
ESTAGB1WB017303	354	10	24	(aac)5	15	5	3	N
ESTAGB1WB017318	454	247	261	(att)5	15	5	3	Y
ESTAGB1WB017336	298	181	195	(atc)5	15	5	3	Y
ESTAGB1WB017343	492	185	202	(gac)6	18	6	3	Y
ESTAGB1WB017384	248	47	61	(tat)5	15	5	3	N
ESTAGB1WB017405	343	115	129	(aat)5	15	5	3	Y
ESTAGB1WB017405	343	293	307	(tta)5	15	5	3	Y
ESTAGB1WB017410	283	233	250	(tta)6	18	6	3	N
ESTAGB1WB017410	283	254	283	(tta)10	30	10	3	N
ESTAGB1WB017461	352	139	156	(ata)6	18	6	3	N
ESTAGB1WB017472	356	112	129	(att)6	18	6	3	Y
ESTAGB1WB017504	267	249	263	(tta)5	15	5	3	N
ESTAGB1WB017522	513	449	463	(taa)5	15	5	3	N
ESTAGB1WB017567	223	98	112	(ata)5	15	5	3	N
ESTAGB1WB017567	223	146	167	(ta)11	22	11	2	N
ESTAGB1WB017633	224	88	107	(at)10	20	10	2	Y
ESTAGB1WB017667	198	172	195	(at)12	24	12	2	N
ESTAGB1WB017669	321	295	321	(cta)9	27	9	3	N
ESTAGB1WB017670	231	58	96	(ata)13	39	13	3	Y
ESTAGB1WB017671	59	24	43	(ta)10	20	10	2	N
ESTAGB1WB017684	159	86	109	(tg)12	24	12	2	N
ESTAGB1WB017726	168	61	78	(aat)6	18	6	3	N
ESTAGB1WB017735	479	204	218	(tat)5	15	5	3	Y
ESTAGB1WB017754	216	115	129	(gat)5	15	5	3	Y
ESTAGB1WB017767	347	146	166	(tat)7	21	7	3	Y
ESTAGB1WB017771	280	85	102	(ta)9	18	9	2	N
ESTAGB1WB017780	231	72	92	(att)7	21	7	3	N
ESTAGB1WB017862	329	178	192	(agc)5	15	5	3	Y
ESTAGB1WB017931	309	236	259	(ta)12	24	12	2	N
ESTAGB1WB017952	60	27	53	(att)9	27	9	3	N
ESTAGB1WB017967	111	12	29	(tta)6	18	6	3	N
ESTAGB1WB018041	405	277	291	(att)5	15	5	3	Y
ESTAGB1WB018041	405	220	237	(tta)6	18	6	3	Y
ESTAGB1WB018085	336	190	204	(att)5	15	5	3	Y
ESTAGB1WB018101	255	165	188	(tttc)6	24	6	4	Y
ESTAGB1WB018221	374	191	226	(aat)12	36	12	3	Y
ESTAGB1WB018242	323	156	170	(tat)5	15	5	3	Y
ESTAGB1WB018283	403	268	288	(tta)7	21	7	3	Y
ESTAGB1WB018297	474	267	281	(tcg)5	15	5	3	Y
ESTAGB1WB018322	328	129	152	(aaat)6	24	6	4	Y
ESTAGB1WB018329	261	80	94	(ata)5	15	5	3	Y
ESTAGB1WB018411	220	190	207	(gt)9	18	9	2	N
ESTAGB1WB018422	296	45	68	(ataa)6	24	6	4	Y
ESTAGB1WB018472	204	48	65	(cgc)6	18	6	3	Y
ESTAGB1WB018551	229	27	47	(tga)7	21	7	3	Y
ESTAGB1WB018559	57	6	23	(att)6	18	6	3	N
ESTAGB1WB018574	445	176	190	(tat)5	15	5	3	Y
ESTAGB1WB018645	86	67	84	(tat)6	18	6	3	N
ESTAGB1WB018660	216	150	165	(at)8	16	8	2	Y
ESTAGB1WB018685	377	252	269	(gt)9	18	9	2	Y
ESTAGB1WB018685	377	109	124	(ta)8	16	8	2	Y
ESTAGB1WB018693	87	44	64	(tta)7	21	7	3	N
ESTAGB1WB018699	194	90	104	(taa)5	15	5	3	Y
ESTAGB1WB018731	290	269	283	(tta)5	15	5	3	N
ESTAGB1WB018830	380	231	251	(tta)7	21	7	3	N
ESTAGB1WB018841	149	97	129	(ata)11	33	11	3	N
ESTAGB1WB018845	325	308	325	(ta)9	18	9	2	N
ESTAGB1WB018849	172	65	82	(ta)9	18	9	2	N
ESTAGB1WB019023	194	120	137	(ttc)6	18	6	3	N
ESTAGB1WB019066	207	192	206	(tta)5	15	5	3	N
ESTAGB1WB019089	305	130	162	(ata)11	33	11	3	Y
ESTAGB1WB019107	454	105	119	(att)5	15	5	3	Y
ESTAGB1WB019107	454	88	102	(tta)5	15	5	3	Y
ESTAGB1WB019121	406	273	287	(tta)5	15	5	3	N
ESTAGB1WB019135	279	188	202	(tat)5	15	5	3	Y
ESTAGB1WB019169	259	50	64	(att)5	15	5	3	N
ESTAGB1WB019176	89	1	26	(ac)13	26	13	2	N
ESTAGB1WB019197	244	157	172	(ta)8	16	8	2	N
ESTAGB1WB019253	383	278	295	(tat)6	18	6	3	Y
ESTAGB1WB019264	243	226	243	(ta)9	18	9	2	N
ESTAGB1WB019285	77	30	71	(tta)14	42	14	3	N
GMAGB2RR000010	1134	614	629	(tg)8	16	8	2	Y
GMAGB2RR000018	959	521	541	(cgc)7	21	7	3	Y
GMAGB2RR000020	811	229	244	(gt)8	16	8	2	Y
GMAGB2RR000024	552	248	262	(tcg)5	15	5	3	Y
GMAGB2RR000029	526	291	305	(tgc)5	15	5	3	Y
GMAGB2RR000031	709	116	139	(gca)8	24	8	3	Y
GMAGB2RR000031	709	546	560	(ggc)5	15	5	3	Y
GMAGB2RR000039	1175	961	975	(tat)5	15	5	3	Y
GMAGB2RR000046	506	1	16	(at)8	16	8	2	N
GMAGB2RR000056	981	775	792	(gcg)6	18	6	3	Y
GMAGB2RR000056	981	1	27	(gtg)9	27	9	3	N
GMAGB2RR000060	1846	1831	1845	(cgg)5	15	5	3	N
GMAGB2RR000062	1019	689	703	(tat)5	15	5	3	Y
GMAGB2RR000065	623	1	22	(at)11	22	11	2	N
GMAGB2RR000067	1453	304	318	(tat)5	15	5	3	Y
GMAGB2RR000069	1141	1065	1079	(aat)5	15	5	3	Y
GMAGB2RR000072	550	127	141	(cgg)5	15	5	3	Y
GMAGB2RR000072	550	1	21	(gct)7	21	7	3	N
GMAGB2RR000078	553	324	338	(ata)5	15	5	3	Y
GMAGB2RR000080	902	807	821	(tat)5	15	5	3	Y
GMAGB2RR000081	512	426	440	(ata)5	15	5	3	Y
GMAGB2RR000081	512	467	481	(gac)5	15	5	3	Y
GMAGB2RR000085	1062	173	188	(tc)8	16	8	2	Y
GMAGB2RR000088	554	439	458	(ac)10	20	10	2	Y
GMAGB2RR000096	805	699	716	(ccg)6	18	6	3	Y
GMAGB2RR000096	805	335	349	(gcg)5	15	5	3	Y
GMAGB2RR000101	1204	765	779	(ata)5	15	5	3	Y
GMAGB2RR000101	1204	1074	1094	(att)7	21	7	3	Y
GMAGB2RR000107	1216	640	655	(ac)8	16	8	2	Y
GMAGB2RR000109	1406	1202	1216	(aat)5	15	5	3	Y
GMAGB2RR000114	1311	1048	1062	(gtc)5	15	5	3	Y
GMAGB2RR000116	903	181	198	(tg)9	18	9	2	Y
GMAGB2RR000121	525	1	16	(ta)8	16	8	2	N
GMAGB2RR000124	903	615	630	(ag)8	16	8	2	Y
GMAGB2RR000124	903	335	352	(tcg)6	18	6	3	Y
GMAGB2RR000124	903	405	422	(tg)9	18	9	2	Y
GMAGB2RR000127	532	1	24	(tac)8	24	8	3	N
GMAGB2RR000129	615	71	88	(atg)6	18	6	3	Y
GMAGB2RR000131	574	550	573	(ag)12	24	12	2	N
GMAGB2RR000134	1688	95	109	(aat)5	15	5	3	Y
GMAGB2RR000134	1688	495	509	(ctg)5	15	5	3	Y
GMAGB2RR000137	593	13	28	(ca)8	16	8	2	N
GMAGB2RR000140	1424	959	973	(tta)5	15	5	3	Y
GMAGB2RR000142	1029	1	24	(aat)8	24	8	3	N
GMAGB2RR000144	868	701	718	(gc)9	18	9	2	Y
GMAGB2RR000144	868	849	866	(gtc)6	18	6	3	N
GMAGB2RR000144	868	461	481	(tcg)7	21	7	3	Y
GMAGB2RR000150	1324	579	593	(tat)5	15	5	3	Y
GMAGB2RR000154	600	585	599	(cgc)5	15	5	3	N
GMAGB2RR000157	606	1	24	(ccg)8	24	8	3	N
GMAGB2RR000167	667	645	666	(ac)11	22	11	2	N
GMAGB2RR000169	732	518	541	(caga)6	24	6	4	Y
GMAGB2RR000169	732	404	421	(tat)6	18	6	3	Y
GMAGB2RR000193	1001	492	507	(ac)8	16	8	2	Y
GMAGB2RR000193	1001	540	554	(tta)5	15	5	3	Y
GMAGB2RR000196	702	679	702	(ac)12	24	12	2	N
GMAGB2RR000198	833	722	737	(at)8	16	8	2	Y
GMAGB2RR000201	582	1	16	(ta)8	16	8	2	N
GMAGB2RR000206	1138	1088	1105	(at)9	18	9	2	N
GMAGB2RR000210	548	313	333	(ata)7	21	7	3	Y
GMAGB2RR000212	1034	218	232	(aat)5	15	5	3	Y
GMAGB2RR000212	1034	95	115	(gct)7	21	7	3	Y
GMAGB2RR000217	986	1	20	(ta)10	20	10	2	N
GMAGB2RR000220	1056	966	986	(att)7	21	7	3	Y
GMAGB2RR000221	788	1	26	(ca)13	26	13	2	N
GMAGB2RR000225	888	1	21	(att)7	21	7	3	N
GMAGB2RR000241	817	1	26	(ac)13	26	13	2	N
GMAGB2RR000247	542	102	116	(cag)5	15	5	3	Y
GMAGB2RR000252	865	839	864	(tg)13	26	13	2	N
GMAGB2RR000261	824	393	412	(tc)10	20	10	2	Y
GMAGB2RR000262	674	646	672	(tat)9	27	9	3	N
GMAGB2RR000263	1678	156	170	(cgt)5	15	5	3	Y
GMAGB2RR000263	1678	885	899	(ctg)5	15	5	3	Y
GMAGB2RR000266	995	114	128	(ata)5	15	5	3	Y
GMAGB2RR000267	655	259	276	(agc)6	18	6	3	Y
GMAGB2RR000267	655	1	20	(at)10	20	10	2	N
GMAGB2RR000268	1290	1050	1065	(at)8	16	8	2	Y
GMAGB2RR000268	1290	1226	1241	(at)8	16	8	2	Y
GMAGB2RR000269	1632	1553	1568	(ac)8	16	8	2	Y
GMAGB2RR000269	1632	1604	1630	(acg)9	27	9	3	N
GMAGB2RR000273	1509	1495	1509	(gac)5	15	5	3	N
GMAGB2RR000276	565	542	565	(ta)12	24	12	2	N
GMAGB2RR000292	628	454	468	(tat)5	15	5	3	Y
GMAGB2RR000293	526	479	494	(ta)8	16	8	2	N
GMAGB2RR000293	526	503	526	(tat)8	24	8	3	N
GMAGB2RR000297	852	294	317	(ata)8	24	8	3	Y
GMAGB2RR000305	814	13	27	(aat)5	15	5	3	N
GMAGB2RR000308	713	491	506	(tg)8	16	8	2	Y
GMAGB2RR000310	531	285	300	(ac)8	16	8	2	Y
GMAGB2RR000311	1185	1122	1139	(att)6	18	6	3	Y
GMAGB2RR000313	989	337	356	(at)10	20	10	2	Y
GMAGB2RR000328	737	575	592	(tat)6	18	6	3	Y
GMAGB2RR000328	737	699	719	(tat)7	21	7	3	N
GMAGB2RR000338	522	475	489	(taa)5	15	5	3	N
GMAGB2RR000345	512	117	134	(ac)9	18	9	2	Y
GMAGB2RR000346	590	340	355	(at)8	16	8	2	Y
GMAGB2RR000348	688	380	397	(tg)9	18	9	2	Y
GMAGB2RR000351	2133	264	279	(ca)8	16	8	2	Y
GMAGB2RR000352	938	489	503	(ttg)5	15	5	3	Y
GMAGB2RR000361	660	1	18	(ta)9	18	9	2	N
GMAGB2RR000365	712	475	490	(ta)8	16	8	2	Y
GMAGB2RR000372	535	313	327	(tat)5	15	5	3	Y
GMAGB2RR000373	928	875	890	(at)8	16	8	2	N
GMAGB2RR000384	562	58	72	(tat)5	15	5	3	Y
GMAGB2RR000388	607	501	518	(ata)6	18	6	3	Y
GMAGB2RR000388	607	289	308	(ta)10	20	10	2	Y
GMAGB2RR000390	992	108	122	(taa)5	15	5	3	Y
GMAGB2RR000391	853	349	363	(tat)5	15	5	3	Y
GMAGB2RR000392	614	443	458	(ta)8	16	8	2	Y
GMAGB2RR000395	500	1	24	(tat)8	24	8	3	N
GMAGB2RR000396	949	928	949	(ca)11	22	11	2	N
GMAGB2RR000397	1186	968	982	(tct)5	15	5	3	Y
GMAGB2RR000397	1186	898	912	(ttg)5	15	5	3	Y
GMAGB2RR000403	676	528	542	(cga)5	15	5	3	Y
GMAGB2RR000406	975	831	851	(tta)7	21	7	3	Y
GMAGB2RR000407	994	1	21	(tat)7	21	7	3	N
GMAGB2RR000410	608	167	182	(ag)8	16	8	2	Y
GMAGB2RR000410	608	593	608	(ta)8	16	8	2	N
GMAGB2RR000411	579	15	30	(ta)8	16	8	2	N
GMAGB2RR000411	579	564	579	(ta)8	16	8	2	N
GMAGB2RR000414	708	86	103	(ta)9	18	9	2	Y
GMAGB2RR000417	668	169	186	(gtc)6	18	6	3	Y
GMAGB2RR000420	613	6	29	(ta)12	24	12	2	N
GMAGB2RR000420	613	382	405	(tg)12	24	12	2	Y
GMAGB2RR000423	563	283	297	(ata)5	15	5	3	Y
GMAGB2RR000423	563	535	561	(taa)9	27	9	3	N
GMAGB2RR000423	563	504	518	(tcg)5	15	5	3	N
GMAGB2RR000425	514	456	470	(att)5	15	5	3	N
GMAGB2RR000430	581	3	18	(tg)8	16	8	2	N
GMAGB2RR000433	722	456	471	(at)8	16	8	2	Y
GMAGB2RR000437	692	470	490	(aat)7	21	7	3	Y
GMAGB2RR000452	540	390	405	(at)8	16	8	2	Y
GMAGB2RR000454	588	302	316	(tta)5	15	5	3	Y
GMAGB2RR000457	1111	225	245	(tat)7	21	7	3	Y
GMAGB2RR000465	508	1	15	(gcg)5	15	5	3	N
GMAGB2RR000473	729	711	728	(gt)9	18	9	2	N
GMAGB2RR000475	967	513	528	(ta)8	16	8	2	Y
GMAGB2RR000475	967	940	955	(ta)8	16	8	2	N
GMAGB2RR000476	578	248	262	(att)5	15	5	3	Y
GMAGB2RR000477	860	27	42	(ta)8	16	8	2	N
GMAGB2RR000484	717	1	24	(ata)8	24	8	3	N
GMAGB2RR000487	612	96	119	(ta)12	24	12	2	Y
GMAGB2RR000490	540	107	121	(ata)5	15	5	3	Y
GMAGB2RR000496	871	375	390	(at)8	16	8	2	Y
GMAGB2RR000497	505	96	110	(tat)5	15	5	3	N
GMAGB2RR000499	722	70	84	(cta)5	15	5	3	Y
GMAGB2RR000503	1303	94	109	(ga)8	16	8	2	Y
GMAGB2RR000503	1303	1	24	(tcg)8	24	8	3	N
GMAGB2RR000505	810	21	36	(at)8	16	8	2	N
GMAGB2RR000509	511	1	18	(tc)9	18	9	2	N
GMAGB2RR000510	715	369	386	(ata)6	18	6	3	Y
GMAGB2RR000510	715	450	464	(gcc)5	15	5	3	Y
GMAGB2RR000512	630	601	630	(cagcaa)5	30	5	6	N
GMAGB2RR000518	658	545	559	(gcc)5	15	5	3	Y
GMAGB2RR000518	658	161	178	(tat)6	18	6	3	Y
GMAGB2RR000519	1512	643	658	(cg)8	16	8	2	Y
GMAGB2RR000521	505	249	264	(tg)8	16	8	2	Y
GMAGB2RR000522	764	368	382	(tat)5	15	5	3	Y
GMAGB2RR000524	650	624	649	(tg)13	26	13	2	N
GMAGB2RR000532	532	1	27	(acg)9	27	9	3	N
GMAGB2RR000534	780	268	287	(ac)10	20	10	2	Y
GMAGB2RR000539	548	434	449	(gt)8	16	8	2	Y
GMAGB2RR000540	529	266	289	(ata)8	24	8	3	Y
GMAGB2RR000540	529	1	27	(att)9	27	9	3	N
GMAGB2RR000545	1340	667	681	(aat)5	15	5	3	Y
GMAGB2RR000545	1340	553	572	(tc)10	20	10	2	Y
GMAGB2RR000548	568	543	568	(ac)13	26	13	2	N
GMAGB2RR000549	513	427	448	(ta)11	22	11	2	Y
GMAGB2RR000563	611	462	477	(at)8	16	8	2	Y
GMAGB2RR000569	917	895	916	(ac)11	22	11	2	N
GMAGB2RR000569	917	16	30	(gta)5	15	5	3	N
GMAGB2RR000569	917	1	15	(tta)5	15	5	3	N
GMAGB2RR000570	577	282	299	(at)9	18	9	2	Y
GMAGB2RR000575	506	422	439	(ta)9	18	9	2	Y
GMAGB2RR000578	548	523	540	(gcg)6	18	6	3	N
GMAGB2RR000583	598	1	20	(ct)10	20	10	2	N
GMAGB2RR000585	733	318	335	(ac)9	18	9	2	Y
GMAGB2RR000592	783	310	324	(ata)5	15	5	3	Y
GMAGB2RR000592	783	760	783	(ata)8	24	8	3	N
GMAGB2RR000595	1486	934	948	(ata)5	15	5	3	Y
GMAGB2RR000602	640	127	142	(ca)8	16	8	2	Y
GMAGB2RR000603	1015	748	763	(gt)8	16	8	2	Y
GMAGB2RR000604	625	369	383	(tat)5	15	5	3	Y
GMAGB2RR000609	910	1	22	(ac)11	22	11	2	N
GMAGB2RR000610	503	1	26	(gt)13	26	13	2	N
GMAGB2RR000610	503	240	263	(tg)12	24	12	2	Y
GMAGB2RR000613	665	374	388	(aca)5	15	5	3	Y
GMAGB2RR000613	665	315	332	(tcg)6	18	6	3	Y
GMAGB2RR000616	552	423	437	(gtc)5	15	5	3	Y
GMAGB2RR000616	552	536	551	(tg)8	16	8	2	N
GMAGB2RR000618	509	472	489	(tta)6	18	6	3	N
GMAGB2RR000619	1658	1489	1506	(ata)6	18	6	3	Y
GMAGB2RR000619	1658	962	979	(gtc)6	18	6	3	Y
GMAGB2RR000619	1658	937	960	(tcg)8	24	8	3	Y
GMAGB2RR000630	508	186	200	(cag)5	15	5	3	Y
GMAGB2RR000630	508	486	506	(cag)7	21	7	3	N
GMAGB2RR000630	508	386	403	(cca)6	18	6	3	Y
GMAGB2RR000637	1138	297	311	(aat)5	15	5	3	Y
GMAGB2RR000637	1138	364	384	(tta)7	21	7	3	Y
GMAGB2RR000650	502	148	173	(ag)13	26	13	2	Y
GMAGB2RR000652	607	478	498	(taa)7	21	7	3	Y
GMAGB2RR000653	635	1	26	(ca)13	26	13	2	N
GMAGB2RR000660	764	443	457	(tat)5	15	5	3	Y
GMAGB2RR000672	653	636	653	(gt)9	18	9	2	N
GMAGB2RR000682	995	730	744	(cat)5	15	5	3	Y
GMAGB2RR000687	571	522	539	(aat)6	18	6	3	N
GMAGB2RR000689	1118	336	350	(tat)5	15	5	3	Y
GMAGB2RR000693	653	513	527	(tat)5	15	5	3	Y
GMAGB2RR000697	617	1	26	(gt)13	26	13	2	N
GMAGB2RR000700	554	1	24	(ac)12	24	12	2	N
GMAGB2RR000700	554	535	554	(gt)10	20	10	2	N
GMAGB2RR000702	626	572	587	(cg)8	16	8	2	N
GMAGB2RR000703	676	616	633	(taa)6	18	6	3	Y
GMAGB2RR000708	839	2	25	(ata)8	24	8	3	Y
GMAGB2RR000714	805	408	422	(aat)5	15	5	3	Y
GMAGB2RR000718	688	444	461	(att)6	18	6	3	Y
GMAGB2RR000720	1017	5	19	(att)5	15	5	3	N
GMAGB2RR000720	1017	471	485	(tat)5	15	5	3	Y
GMAGB2RR000725	588	517	534	(ta)9	18	9	2	Y
GMAGB2RR000727	771	1	20	(ca)10	20	10	2	N
GMAGB2RR000730	511	260	275	(gc)8	16	8	2	Y
GMAGB2RR000731	534	164	181	(ata)6	18	6	3	Y
GMAGB2RR000736	882	114	131	(tta)6	18	6	3	Y
GMAGB2RR000741	608	550	569	(ac)10	20	10	2	Y
GMAGB2RR000744	658	198	212	(cag)5	15	5	3	Y
GMAGB2RR000760	765	745	765	(att)7	21	7	3	N
GMAGB2RR000761	551	531	545	(ggc)5	15	5	3	N
GMAGB2RR000772	523	1	22	(gt)11	22	11	2	N
GMAGB2RR000776	804	775	798	(acg)8	24	8	3	N
GMAGB2RR000778	518	1	22	(ac)11	22	11	2	N
GMAGB2RR000778	518	494	511	(tat)6	18	6	3	N
GMAGB2RR000781	676	635	649	(att)5	15	5	3	Y
GMAGB2RR000783	549	315	334	(ta)10	20	10	2	Y
GMAGB2RR000793	1018	496	513	(cg)9	18	9	2	Y
GMAGB2RR000793	1018	1001	1018	(gtg)6	18	6	3	N
GMAGB2RR000796	804	10	31	(ga)11	22	11	2	N
GMAGB2RR000797	860	174	188	(ata)5	15	5	3	Y
GMAGB2RR000797	860	8	27	(tg)10	20	10	2	N
GMAGB2RR000799	590	2	17	(ta)8	16	8	2	Y
GMAGB2RR000802	511	415	432	(acg)6	18	6	3	Y
GMAGB2RR000802	511	391	414	(aga)8	24	8	3	Y
GMAGB2RR000807	698	451	466	(tc)8	16	8	2	Y
GMAGB2RR000813	822	1	24	(at)12	24	12	2	N
GMAGB2RR000816	653	323	337	(ata)5	15	5	3	Y
GMAGB2RR000817	705	685	704	(ac)10	20	10	2	N
GMAGB2RR000829	508	1	26	(ca)13	26	13	2	N
GMAGB2RR000829	508	119	140	(ca)11	22	11	2	Y
GMAGB2RR000839	547	1	26	(ac)13	26	13	2	N
GMAGB2RR000844	565	323	338	(gt)8	16	8	2	Y
GMAGB2RR000853	570	334	349	(ta)8	16	8	2	Y
GMAGB2RR000858	562	479	499	(tat)7	21	7	3	Y
GMAGB2RR000859	751	144	161	(aat)6	18	6	3	Y
GMAGB2RR000860	528	509	526	(aat)6	18	6	3	N
GMAGB2RR000865	818	463	477	(taa)5	15	5	3	Y
GMAGB2RR000867	830	762	781	(tg)10	20	10	2	Y
GMAGB2RR000870	541	387	404	(tg)9	18	9	2	Y
GMAGB2RR000872	530	22	36	(aat)5	15	5	3	N
GMAGB2RR000876	515	15	30	(at)8	16	8	2	N
GMAGB2RR000876	515	473	490	(ta)9	18	9	2	Y
GMAGB2RR000879	1133	31	46	(at)8	16	8	2	N
GMAGB2RR000879	1133	901	915	(ata)5	15	5	3	Y
GMAGB2RR000879	1133	536	553	(ccg)6	18	6	3	Y
GMAGB2RR000884	548	1	22	(ca)11	22	11	2	N
GMAGB2RR000889	644	615	630	(tg)8	16	8	2	N
GMAGB2RR000897	517	434	448	(cga)5	15	5	3	Y
GMAGB2RR000897	517	488	517	(gtt)10	30	10	3	N
GMAGB2RR000899	537	62	76	(cgt)5	15	5	3	Y
GMAGB2RR000904	815	730	744	(aat)5	15	5	3	Y
GMAGB2RR000905	545	261	280	(ta)10	20	10	2	Y
GMAGB2RR000906	889	872	889	(ata)6	18	6	3	N
GMAGB2RR000906	889	15	29	(att)5	15	5	3	N
GMAGB2RR000907	794	43	57	(gct)5	15	5	3	Y
GMAGB2RR000913	574	116	133	(tcg)6	18	6	3	Y
GMAGB2RR000914	715	513	527	(tta)5	15	5	3	Y
GMAGB2RR000920	528	219	236	(tat)6	18	6	3	Y
GMAGB2RR000926	558	241	255	(tat)5	15	5	3	Y
GMAGB2RR000928	945	318	332	(tta)5	15	5	3	Y
GMAGB2RR000929	601	579	600	(at)11	22	11	2	N
GMAGB2RR000942	502	114	128	(cgg)5	15	5	3	Y
GMAGB2RR000943	619	588	607	(at)10	20	10	2	N
GMAGB2RR000962	857	1	20	(ac)10	20	10	2	N
GMAGB2RR000964	918	780	794	(tta)5	15	5	3	Y
GMAGB2RR000973	1255	600	617	(ta)9	18	9	2	Y
GMAGB2RR000973	1255	159	174	(tg)8	16	8	2	Y
GMAGB2RR000985	638	621	638	(ga)9	18	9	2	N
GMAGB2RR000990	507	54	68	(cgg)5	15	5	3	Y
GMAGB2RR000991	918	323	338	(ta)8	16	8	2	Y
GMAGB2RR000999	989	269	283	(gtc)5	15	5	3	Y
GMAGB2RR000999	989	1	16	(tg)8	16	8	2	N
GMAGB2RR001004	532	152	169	(cgt)6	18	6	3	Y
GMAGB2RR001004	532	317	331	(tat)5	15	5	3	Y
GMAGB2RR001022	690	212	232	(aat)7	21	7	3	Y
GMAGB2RR001022	690	115	129	(gtc)5	15	5	3	Y
GMAGB2RR001023	529	412	427	(ta)8	16	8	2	Y
GMAGB2RR001031	533	436	450	(aat)5	15	5	3	Y
GMAGB2RR001031	533	370	387	(ta)9	18	9	2	Y
GMAGB2RR001032	582	494	514	(att)7	21	7	3	Y
GMAGB2RR001032	582	102	123	(ca)11	22	11	2	Y
GMAGB2RR001040	700	679	700	(at)11	22	11	2	N
GMAGB2RR001040	700	429	444	(gt)8	16	8	2	Y
GMAGB2RR001042	588	368	382	(ccg)5	15	5	3	Y
GMAGB2RR001049	898	692	709	(ag)9	18	9	2	Y
GMAGB2RR001058	604	25	46	(tc)11	22	11	2	Y
GMAGB2RR001059	571	1	26	(gt)13	26	13	2	N
GMAGB2RR001059	571	355	372	(tat)6	18	6	3	Y
GMAGB2RR001060	536	511	534	(tat)8	24	8	3	N
GMAGB2RR001060	536	491	505	(tta)5	15	5	3	N
GMAGB2RR001061	670	68	88	(tat)7	21	7	3	Y
GMAGB2RR001063	550	1	16	(ca)8	16	8	2	N
GMAGB2RR001066	529	1	28	(tc)14	28	14	2	N
GMAGB2RR001069	536	290	304	(cgg)5	15	5	3	Y
GMAGB2RR001075	707	35	49	(ggc)5	15	5	3	N
GMAGB2RR001075	707	1	24	(ta)12	24	12	2	N
GMAGB2RR001076	549	461	476	(at)8	16	8	2	Y
GMAGB2RR001082	730	706	729	(ca)12	24	12	2	N
GMAGB2RR001093	711	112	127	(at)8	16	8	2	Y
GMAGB2RR001093	711	1	27	(ata)9	27	9	3	N
GMAGB2RR001093	711	93	108	(ca)8	16	8	2	Y
GMAGB2RR001098	787	401	421	(tat)7	21	7	3	Y
GMAGB2RR001099	559	360	381	(ta)11	22	11	2	Y
GMAGB2RR001104	560	533	559	(tac)9	27	9	3	N
GMAGB2RR001109	1013	788	808	(gtc)7	21	7	3	Y
GMAGB2RR001109	1013	707	724	(ta)9	18	9	2	Y
GMAGB2RR001113	906	95	109	(ata)5	15	5	3	Y
GMAGB2RR001114	1026	405	422	(aat)6	18	6	3	Y
GMAGB2RR001114	1026	623	637	(acg)5	15	5	3	Y
GMAGB2RR001114	1026	507	527	(cag)7	21	7	3	Y
GMAGB2RR001115	583	277	292	(gt)8	16	8	2	Y
GMAGB2RR001122	525	1	24	(at)12	24	12	2	N
GMAGB2RR001122	525	496	513	(at)9	18	9	2	N
GMAGB2RR001124	603	298	312	(aat)5	15	5	3	Y
GMAGB2RR001133	536	6	29	(ac)12	24	12	2	N
GMAGB2RR001142	525	498	525	(tg)14	28	14	2	N
GMAGB2RR001143	515	496	515	(tg)10	20	10	2	N
GMAGB2RR001145	523	397	414	(ata)6	18	6	3	Y
GMAGB2RR001146	684	184	201	(aat)6	18	6	3	Y
GMAGB2RR001148	643	79	94	(ta)8	16	8	2	Y
GMAGB2RR001151	504	1	26	(ac)13	26	13	2	N
GMAGB2RR001154	713	13	33	(gcg)7	21	7	3	N
GMAGB2RR001161	514	116	130	(taa)5	15	5	3	Y
GMAGB2RR001163	611	1	24	(aca)8	24	8	3	N
GMAGB2RR001165	662	112	131	(aaat)5	20	5	4	Y
GMAGB2RR001166	705	70	84	(aat)5	15	5	3	Y
GMAGB2RR001166	705	55	69	(att)5	15	5	3	Y
GMAGB2RR001172	706	1	21	(tat)7	21	7	3	N
GMAGB2RR001178	523	121	135	(gag)5	15	5	3	Y
GMAGB2RR001179	510	487	510	(ca)12	24	12	2	N
GMAGB2RR001181	518	123	138	(at)8	16	8	2	Y
GMAGB2RR001184	534	326	341	(at)8	16	8	2	Y
GMAGB2RR001191	536	399	413	(aat)5	15	5	3	Y
GMAGB2RR001194	529	24	39	(at)8	16	8	2	N
GMAGB2RR001198	612	593	610	(tta)6	18	6	3	N
GMAGB2RR001200	550	416	435	(ta)10	20	10	2	Y
GMAGB2RR001207	530	432	451	(tg)10	20	10	2	Y
GMAGB2RR001208	640	422	442	(aat)7	21	7	3	Y
GMAGB2RR001213	527	163	178	(ta)8	16	8	2	Y
GMAGB2RR001213	527	372	387	(ta)8	16	8	2	Y
GMAGB2RR001217	663	403	420	(tta)6	18	6	3	Y
