# Supplementary material for: Combining Next-Generation Sequencing Strategies for Rapid Molecular Resource Development from an Invasive Aphid Species, Aphis glycines
Source: PLoS One. 2010 Jun 29;5(6):e11370. doi: 10.1371/journal.pone.0011370 (PMC2894077; doi:10.1371/journal.pone.0011370)
Supplement: Table S8 — Potential Buchnera sequences in Aphis glycines B1 and B2 sequences (0.03 MB XLS) [file pone.0011370.s009.xls]

## Sheet: Buchnera
A. glycines sequence name	Hit accession	Hit protein name	Hit description	Organism	E value	Similarity (%)
ESTAGB1WB014352	AAC97354	HisG	ATP phosphoribosyltransferase	Buchnera aphidicola	2.83e-10	97
ESTAGB1WB015486	ABZ89693	MurE	UDP-N-acetylmuramoylalanyl-D-glutamate--2,6-diaminopimelate ligase	Buchnera aphidicola	1.34e-41	80
ESTAGB1WB017047	AAC38108	GyrB	DNA gyrase subunit B	Buchnera aphidicola	5.32e-18	90
ESTAGB1WB010682	YP_002467788	YidC	60 kDa inner-membrane protein	Buchnera aphidicola str. 5A (Acyrthosiphon pisum)	6.18e-66	87
ESTAGB1WB014418	YP_002468108	Uup	ABC transporter ATP-binding protein Uup	Buchnera aphidicola str. 5A (Acyrthosiphon pisum)	3.19e-06	70
ESTAGB1WB018312	YP_002467784	GyrB	DNA gyrase subunit B	Buchnera aphidicola str. 5A (Acyrthosiphon pisum)	1.2e-13	97
ESTAGB1WB001840	NP_240398	IlvC	ketol-acid reductoisomerase	Buchnera aphidicola str. APS (Acyrthosiphon pisum)	7.57e-52	89
ESTAGB1WB007157	NP_240075	Gpt	xanthine phosphoribosyltransferase	Buchnera aphidicola str. APS (Acyrthosiphon pisum)	8.51e-23	91
ESTAGB1WB010088	NP_240111	GcpE	GcpE protein	Buchnera aphidicola str. APS (Acyrthosiphon pisum)	1.5e-40	73
ESTAGB1WB014299	NP_240042	YadR	hypothetical protein	Buchnera aphidicola str. APS (Acyrthosiphon pisum)	7.42e-19	86
ESTAGB1WB015910	NP_240213	TrmD	tRNA (guanine-N1)-methyltransferase	Buchnera aphidicola str. APS (Acyrthosiphon pisum)	1.64e-31	84
ESTAGB1WB016352	NP_239945	RnfA	hypothetical protein BUAP5A_111	Buchnera aphidicola str. APS (Acyrthosiphon pisum)	1.17e-08	91
ESTAGB1WB018780	NP_239951	Nth	endonuclease III	Buchnera aphidicola str. APS (Acyrthosiphon pisum)	3.45e-07	80
ESTAGB1WB010786	YP_802755	RpsA	30S ribosomal protein S1	Buchnera aphidicola str. Cc (Cinara cedri)	1.83e-25	84
ESTAGB1WB000431	NP_660503	DnaK	DNAK protein (heat shock protein 70)	Buchnera aphidicola str. Sg (Schizaphis graminum)	3.62e-67	98
ESTAGB1WB000695	NP_660542	ThrA	bifunctional aspartokinase/homoserine dehydrogenase	Buchnera aphidicola str. Sg (Schizaphis graminum)	3.51e-35	67
ESTAGB1WB001584	NP_660396	RplL	50S ribosomal protein L7/L12	Buchnera aphidicola str. Sg (Schizaphis graminum)	1.96e-39	92
ESTAGB1WB005743	NP_660616	TrpD	anthranilate phosphoribosyltransferase	Buchnera aphidicola str. Sg (Schizaphis graminum)	3.44e-16	87
ESTAGB1WB006080	NP_660794	PpiD	peptidyl-prolyl cis-trans isomerase D	Buchnera aphidicola str. Sg (Schizaphis graminum)	2.59e-12	59
ESTAGB1WB007776	NP_660643	RpsA	30S ribosomal protein S1	Buchnera aphidicola str. Sg (Schizaphis graminum)	1.72e-34	83
ESTAGB1WB009273	NP_660645	SerC	phosphoserine aminotransferase	Buchnera aphidicola str. Sg (Schizaphis graminum)	1.11e-14	88
ESTAGB1WB010251	NP_660616	TrpD	anthranilate phosphoribosyltransferase	Buchnera aphidicola str. Sg (Schizaphis graminum)	6.07e-37	86
ESTAGB1WB010399	NP_660545	PanB	3-methyl-2-oxobutanoate hydroxymethyltransferase	Buchnera aphidicola str. Sg (Schizaphis graminum)	3.61e-18	72
ESTAGB1WB011036	NP_660770	RecC	exodeoxyribonuclease V 125 kD polypeptide	Buchnera aphidicola str. Sg (Schizaphis graminum)	1.06e-30	73
ESTAGB1WB011222	NP_660796	MdlA	multidrug resistance-like ATP-binding protein	Buchnera aphidicola str. Sg (Schizaphis graminum)	5.2e-25	89
ESTAGB1WB013317	NP_660483	YajC	hypothetical 11.9 kDa protein	Buchnera aphidicola str. Sg (Schizaphis graminum)	4.9e-23	64
ESTAGB1WB013479	NP_660762	HolA	DNA polymerase III delta subunit	Buchnera aphidicola str. Sg (Schizaphis graminum)	2.83e-10	59
ESTAGB1WB013694	NP_660694	Uup	ABC transporter ATP-binding protein Uup	Buchnera aphidicola str. Sg (Schizaphis graminum)	1.82e-17	64
ESTAGB1WB013926	NP_660626	BioB	biotin synthase	Buchnera aphidicola str. Sg (Schizaphis graminum)	7.36e-35	93
ESTAGB1WB014488	NP_660546	DksA	DNAK suppressor protein	Buchnera aphidicola str. Sg (Schizaphis graminum)	4.43e-29	94
ESTAGB1WB015133	NP_660484	GlyS	glyS: glycyl-tRNA synthetase beta chain	Buchnera aphidicola str. Sg (Schizaphis graminum)	2.08e-13	60
ESTAGB1WB015458	NP_660678	Rne	ribonuclease E	Buchnera aphidicola str. Sg (Schizaphis graminum)	5.23e-18	96
ESTAGB1WB016853	NP_660611	IspZ	probable intracellular septation protein	Buchnera aphidicola str. Sg (Schizaphis graminum)	4.78e-10	62
ESTAGB1WB016860	NP_660679	RluC	ribosomal large subunit pseudouridine synthase	Buchnera aphidicola str. Sg (Schizaphis graminum)	2.43e-28	86
ESTAGB1WB016910	NP_660761	LeuS	leucyl-tRNA synthetase	Buchnera aphidicola str. Sg (Schizaphis graminum)	6.5e-34	77
ESTAGB1WB017129	NP_660854	DeoB	phosphopentomutase	Buchnera aphidicola str. Sg (Schizaphis graminum)	1.17e-37	81
ESTAGB1WB017380	NP_660738	GlnS	glutaminyl-tRNA synthetase	Buchnera aphidicola str. Sg (Schizaphis graminum)	8.7e-20	72
ESTAGB1WB017747	NP_660740	Eno	enolase	Buchnera aphidicola str. Sg (Schizaphis graminum)	1.29e-20	96
ESTAGB1WB018172	NP_660653	YebA	hypothetical protein BUsg310	Buchnera aphidicola str. Sg (Schizaphis graminum)	6.98e-16	77
ESTAGB1WB018432	NP_660762	HolA	DNA polymerase III delta subunit	Buchnera aphidicola str. Sg (Schizaphis graminum)	6.07e-11	82
ESTAGB1WB018818	NP_660758	YleA	hypothetical 53.7 kDa protein	Buchnera aphidicola str. Sg (Schizaphis graminum)	1.92e-22	81
ESTAGB1WB018865	NP_660675	FlgI	flagellar P-ring protein precursor	Buchnera aphidicola str. Sg (Schizaphis graminum)	2.41e-14	62
ESTAGB1WB001487	YP_002468763	Tig	trigger factor	Buchnera aphidicola str. Tuc7 (Acyrthosiphon pisum)	3.13e-22	69
ESTAGB1WB007850	YP_002468856	AmiB	N-acetylmuramoyl-L-alanine amidase precursor	Buchnera aphidicola str. Tuc7 (Acyrthosiphon pisum)	2.39e-17	70
ESTAGB1WB008755	YP_002468717	CysI	sulfite reductase (NADPH) hemoprotein beta-component	Buchnera aphidicola str. Tuc7 (Acyrthosiphon pisum)	1.31e-54	92
ESTAGB1WB013381	YP_002468494	GyrA	DNA gyrase subunit A	Buchnera aphidicola str. Tuc7 (Acyrthosiphon pisum)	1.09e-26	88
ESTAGB1WB009327	CAC86955	GroEL	GroEL protein	Buchnera sp.	1.6e-42	73
GMAGB2RR000011	NP_660402	MurB	UDP-N-acetylenolpyruvoylglucosamine reductase	Buchnera aphidicola str. Sg (Schizaphis graminum)	3e-31	0.74
GMAGB2RR000012	NP_660776	ThiL	thiamine-monophosphate kinase	Buchnera aphidicola str. Sg (Schizaphis graminum)	1e-119	0.8
GMAGB2RR000021	P42388	TrpG	Anthranilate synthase component 2	Buchnera aphidicola	1e-47	0.96
GMAGB2RR000037	NP_240395	Rho	transcription termination factor Rho	Buchnera aphidicola str. 5A (Acyrthosiphon pisum)	1e-166	1
GMAGB2RR000049	NP_660402	MurB	UDP-N-acetylenolpyruvoylglucosamine reductase	Buchnera aphidicola str. Sg (Schizaphis graminum)	5e-68	0.8
GMAGB2RR000055	NP_660834	RplB	50S ribosomal protein L2	Buchnera aphidicola str. Sg (Schizaphis graminum)	1e-78	0.89
GMAGB2RR000064	NP_660378	TrmE	tRNA modification GTPase TrmE	Buchnera aphidicola str. Sg (Schizaphis graminum)	7e-37	0.72
GMAGB2RR000130	NP_660806	AroE	shikimate 5-dehydrogenase	Buchnera aphidicola str. Sg (Schizaphis graminum)	1e-102	0.82
GMAGB2RR000139	AAO33048	GroEL	GroEL	Buchnera aphidicola	1e-148	0.88
GMAGB2RR000162	P42387	TrpE	Anthranilate synthase component 1	Buchnera aphidicola	0	0.84
GMAGB2RR000166	NP_660893	DapF	diaminopimelate epimerase	Buchnera aphidicola str. Sg (Schizaphis graminum)	1e-46	0.75
GMAGB2RR000214	YP_002468255	RplD	50S ribosomal protein L4	Buchnera aphidicola str. 5A (Acyrthosiphon pisum)	1e-85	0.9
GMAGB2RR000249	NP_240333	TufB	elongation factor Tu	Buchnera aphidicola str. 5A (Acyrthosiphon pisum)	1e-122	0.88
GMAGB2RR000271	NP_660403	MetF	5,10-methylenetetrahydrofolate reductase	Buchnera aphidicola str. Sg (Schizaphis graminum)	5e-97	0.89
GMAGB2RR000675	NP_660586	GloB	hydroxyacylglutathione hydrolase	Buchnera aphidicola str. Sg (Schizaphis graminum)	8e-53	0.67
GMAGB2RR000789	NP_660394	RpoC	DNA-directed RNA polymerase subunit beta'	Buchnera aphidicola str. Sg (Schizaphis graminum)	1e-109	0.94
GMAGB2RR000812	NP_660589	GmhA	phosphoheptose isomerase	Buchnera aphidicola str. Sg (Schizaphis graminum)	1e-45	0.91
GMAGB2RR000819	NP_660585	ArgS	arginyl-tRNA synthetase	Buchnera aphidicola str. Sg (Schizaphis graminum)	4e-64	0.82
GMAGB2RR000852	NP_660733	GshA	glutamate--cysteine ligase	Buchnera aphidicola str. Sg (Schizaphis graminum)	3e-58	0.87
GMAGB2RR000901	NP_660587	RnhA	ribonuclease H	Buchnera aphidicola str. Sg (Schizaphis graminum)	6e-57	0.8
GMAGB2RR001116	NP_660817	SecY	preprotein translocase subunit SecY	Buchnera aphidicola str. Sg (Schizaphis graminum)	1e-69	0.69
